# Supplementary material
Source: publisher figshare collection journal article supplement (https://acs.figshare.com/ndownloader/files/3712432)
Supplement: Supplementary file 1 [file 3712432]

# Supplementary Material (ESI) for Inorganic Chemistry
 
data_global

_audit_update_record
;
2015-12-21 # Formatted by publCIF

;

# publcif _publ_body_element loop start
loop_
_publ_body_element
_publ_body_title
_publ_body_contents

 section 
;
Introduction
; 
;

;
 section 
;
Experimental
; 
;

;
 subsection 
;
Synthesis and crystallization
; 
;

;
 subsection 
;
Refinement
;
;
Crystal data, data collection and structure refinement details are summarized
in Table 1.
;

 section 
;
Results and discussion
; 
;

;
# publcif _publ_body_element loop end

_publ_requested_journal         'Inorg. Chem'
_publ_contact_author_name        'Prof Dirk Volkmer'
_publ_contact_author_address     
;
Institute of Physics,
Chair of Solid State and Material Science
Augsburg University
Universitaetsstrasse 1,
D-86135 Augsburg,
Germany
;
_publ_contact_author_email       dirk.volkmer@uni-ulm.de
_publ_contact_author_fax         '+49 (0)821 598 5955'
_publ_contact_author_phone       '+49 (0)821 598 3006'

loop_
_publ_author_name
_publ_author_address
'Tamas W. Werner'
;
Institute of Physics,
Chair of Solid State and Materials Chemistry
Augsburg University
Universitaetsstrasse 1,
D-86159 Augsburg,
Germany
;

'Stephan Reschke'
;
Experimental Physics V
Center for Electronic Correlations and Magnetism
Institute for Physics
Augsburg University
Universitaetsstrasse 1
D-86159 Augsburg
Germany
;

'Hana Bunzen'
;
Institute of Physics,
Chair of Solid State and Materials Chemistry
Augsburg University
Universitaetsstrasse 1,
D-86159 Augsburg,
Germany
;

'Hans-Albrecht Krug von Nidda'
;
Experimental Physics V
Center for Electronic Correlations and Magnetism
Institute for Physics
Augsburg University
Universitaetsstrasse 1
D-86159 Augsburg
Germany
;

'Joachim Deisenhofer'
;
Experimental Physics V
Center for Electronic Correlations and Magnetism
Institute for Physics
Augsburg University
Universitaetsstrasse 1
D-86159 Augsburg
Germany
;

'Alois Loidl'
;
Experimental Physics V
Center for Electronic Correlations and Magnetism
Institute for Physics
Augsburg University
Universitaetsstrasse 1
D-86159 Augsburg
Germany
;

'Dirk Volkmer'
;
Institute of Physics,
Chair of Solid State and Materials Chemistry
Augsburg University
Universitaetsstrasse 1,
D-86159 Augsburg,
Germany
;

_publ_section_title              
;
[Co5Tp*4(Me2bta)6]: A highly symmetrical pentanuclear Kuratowski complex
featuring tris(pyrazolyl)borate and benzotriazolate ligands
;

_publ_section_abstract
;
The pentanuclear Co(II) complex [Co5Tp*4(Me2bta)6] containing N-donor ligands
(5,6-dimethyl-benzotriazolate; Me2bta6) and N-donor capping ligands
(tris(3,5-dimethyl-1-pyrazolyl)borate; Tp*) was prepared by a simple and
efficientligand exchange reaction from [Co5Cl4(Me2bta)6] and
tetra-<i>n</i>-butyl ammonium tris(3,5-dimethyl-1-pyrazolyl)borate. Compared
to the precursor complex [Co5Cl4(Me2bta)6], which contains one Co(II) ion in
octahedral and four Co(II) ions in tetrahedral coordination geometry, the
title compound features all five Co(II) ions in an octahedral coordination
environment while keeping a high complex symmetry. This results in modified
properties including improved solubility and distinct magnetic behavior as
com-pared to the precursor complex. The molecular structure and phase purity
of the compound was verified by XRPD, UV-Vis, ESI-MS, IR and NMR measurements.
Thermal stability of the compound was determined <i>via</i> TGA. The magnetic
properties of here reported novel complex [Co5Tp*4(Me2bta)6] as well as its
precursor [Co5Cl4(Me2bta)6] were examined in detail <i>via</i> ESR and SQUID
measurements, which indicated weak antiferromagnetic exchange interactions
between high-spin Co(II) centers at T < 20 K and 50 K, respectively.
; 

data_Co5Tp4Me2bta6
 
_audit_creation_method            SHELXL-2013
_chemical_name_systematic
?
_chemical_name_common             ?
_chemical_melting_point           ?
_chemical_formula_moiety          'C108 H136 B4 Co5 N42'
_chemical_formula_sum             'C108 H136 B4 Co5 N42' 
_chemical_formula_weight          2360.47

loop_
 _atom_type_symbol
 _atom_type_description
 _atom_type_scat_dispersion_real
 _atom_type_scat_dispersion_imag
 _atom_type_scat_source
 'C'  'C'   0.0033   0.0016
 'International Tables Vol C Tables 4.2.6.8 and 6.1.1.4'
 'H'  'H'   0.0000   0.0000
 'International Tables Vol C Tables 4.2.6.8 and 6.1.1.4'
 'B'  'B'   0.0013   0.0007
 'International Tables Vol C Tables 4.2.6.8 and 6.1.1.4'
 'Co'  'Co'   0.3494   0.9721
 'International Tables Vol C Tables 4.2.6.8 and 6.1.1.4'
 'N'  'N'   0.0061   0.0033
 'International Tables Vol C Tables 4.2.6.8 and 6.1.1.4'
 
_space_group_crystal_system       tetragonal
_space_group_IT_number            114
_space_group_name_H-M_alt         'P -4 21 c'
_space_group_name_Hall            'P -4 2n'
 
_shelx_space_group_comment
;
The symmetry employed for this shelxl refinement is uniquely defined
by the following loop, which should always be used as a source of
symmetry information in preference to the above space-group names.
They are only intended as comments.
;
 
loop_
 _space_group_symop_operation_xyz
 'x, y, z'
 '-x, -y, z'
 'y, -x, -z'
 '-y, x, -z'
 '-x+1/2, y+1/2, -z+1/2'
 'x+1/2, -y+1/2, -z+1/2'
 '-y+1/2, -x+1/2, z+1/2'
 'y+1/2, x+1/2, z+1/2'
 
_cell_length_a                    17.4852(6)
_cell_length_b                    17.4852(6)
_cell_length_c                    19.1052(6)
_cell_angle_alpha                 90
_cell_angle_beta                  90
_cell_angle_gamma                 90
_cell_volume                      5841.1(4)
_cell_formula_units_Z             2
_cell_measurement_temperature     283(2)
_cell_measurement_reflns_used     9742 
_cell_measurement_theta_min       2.43 
_cell_measurement_theta_max       24.97 
 
_exptl_crystal_description        'block-shaped' 
_exptl_crystal_colour             yellow 
_exptl_crystal_density_meas       ? 
_exptl_crystal_density_method     'not measured'              
_exptl_crystal_density_diffrn     1.342          
_exptl_crystal_F_000              2466
_exptl_transmission_factor_min    ?                                             
_exptl_transmission_factor_max    ?                                             
_exptl_crystal_size_max           0.13 
_exptl_crystal_size_mid           0.06 
_exptl_crystal_size_min           0.05 
_exptl_absorpt_coefficient_mu     0.761
_shelx_estimated_absorpt_T_min    ?
_shelx_estimated_absorpt_T_max    ? 
_exptl_absorpt_correction_type    multi-scan 
_exptl_absorpt_correction_T_min   0.6716  
_exptl_absorpt_correction_T_max   0.7452 
_exptl_absorpt_process_details    'SADABS V2012/1 (Bruker AXS Inc.)' 
 
_exptl_special_details
?
 
_diffrn_ambient_temperature       283(2)
_diffrn_radiation_wavelength      0.71073
_diffrn_radiation_type            MoK\a
_diffrn_source                    'fine-focus sealed tube'
_diffrn_measurement_device_type   'Bruker D8 Venture' 
_diffrn_measurement_method        '\f and \w scans'
_diffrn_detector_area_resol_mean  ? 
_diffrn_reflns_number             90772
_diffrn_reflns_av_unetI/netI      0.0192
_diffrn_reflns_av_R_equivalents   0.0508
_diffrn_reflns_limit_h_min        -20
_diffrn_reflns_limit_h_max        20
_diffrn_reflns_limit_k_min        -20
_diffrn_reflns_limit_k_max        20
_diffrn_reflns_limit_l_min        -22
_diffrn_reflns_limit_l_max        20
_diffrn_reflns_theta_min          2.430
_diffrn_reflns_theta_max          25.062
_diffrn_reflns_theta_full         25.062
_diffrn_measured_fraction_theta_max   0.997
_diffrn_measured_fraction_theta_full  0.997
_diffrn_reflns_Laue_measured_fraction_max    0.997
_diffrn_reflns_Laue_measured_fraction_full   0.997
_diffrn_reflns_point_group_measured_fraction_max   0.998
_diffrn_reflns_point_group_measured_fraction_full  0.979
_reflns_number_total              5177
_reflns_number_gt                 4664
_reflns_threshold_expression      'I > 2\s(I)'
_reflns_Friedel_coverage          0.814
_reflns_Friedel_fraction_max      0.999
_reflns_Friedel_fraction_full     0.979
 
_reflns_special_details
;
 Reflections were merged by SHELXL according to the crystal
 class for the calculation of statistics and refinement.
 
 _reflns_Friedel_fraction is defined as the number of unique
 Friedel pairs measured divided by the number that would be
 possible theoretically, ignoring centric projections and
 systematic absences.
;
 
_computing_data_collection        'Bruker APEX2'
_computing_cell_refinement        'Bruker SAINT'
_computing_data_reduction         'Bruker SAINT'
_computing_structure_solution     'SHELXS-97 (Sheldrick, 1990)'
_computing_structure_refinement   'SHELXL-97 (Sheldrick, 1997)'
_computing_molecular_graphics     Mercury
_computing_publication_material   Word
 
_refine_special_details
?
_refine_ls_structure_factor_coef  Fsqd
_refine_ls_matrix_type            full
_refine_ls_weighting_scheme       calc
_refine_ls_weighting_details
'w=1/[\s^2^(Fo^2^)+(0.0680P)^2^+1.2626P] where P=(Fo^2^+2Fc^2^)/3'
_atom_sites_solution_primary      ?
_atom_sites_solution_secondary    ?
_atom_sites_solution_hydrogens    geom
_refine_ls_hydrogen_treatment     constr
_refine_ls_extinction_method      none
_refine_ls_extinction_coef        .
_refine_ls_abs_structure_details
;
 Flack x determined using 1986 quotients [(I+)-(I-)]/[(I+)+(I-)]
 (Parsons and Flack (2004), Acta Cryst. A60, s61).
;
_refine_ls_abs_structure_Flack    -0.016(4)
_chemical_absolute_configuration  ?
_refine_ls_number_reflns          5177
_refine_ls_number_parameters      368
_refine_ls_number_restraints      0
_refine_ls_R_factor_all           0.0457
_refine_ls_R_factor_gt            0.0378
_refine_ls_wR_factor_ref          0.1085
_refine_ls_wR_factor_gt           0.0997
_refine_ls_goodness_of_fit_ref    1.112
_refine_ls_restrained_S_all       1.112
_refine_ls_shift/su_max           0.014
_refine_ls_shift/su_mean          0.001
 
loop_
 _atom_site_label
 _atom_site_type_symbol
 _atom_site_fract_x
 _atom_site_fract_y
 _atom_site_fract_z
 _atom_site_U_iso_or_equiv
 _atom_site_adp_type
 _atom_site_occupancy
 _atom_site_site_symmetry_order  
 _atom_site_calc_flag
 _atom_site_refinement_flags_posn
 _atom_site_refinement_flags_adp
 _atom_site_refinement_flags_occupancy
 _atom_site_disorder_assembly
 _atom_site_disorder_group
Co1 Co 0.5000 0.5000 0.0000 0.0374(3) Uani 1 4 d S T P . .
Co2 Co 0.67805(3) 0.51477(3) 0.11383(3) 0.04563(19) Uani 1 1 d . . . . .
B1 B 0.8167(4) 0.5350(5) 0.2201(4) 0.0726(18) Uani 1 1 d . . . . .
H1 H 0.8599 0.5415 0.2522 0.087 Uiso 1 1 calc R U . . .
N1 N 0.6594(2) 0.4260(2) 0.03932(19) 0.0452(8) Uani 1 1 d . . . . .
N2 N 0.5959(2) 0.4185(2) 0.0006(2) 0.0400(7) Uani 1 1 d . . . . .
N3 N 0.5985(2) 0.3559(2) -0.03875(19) 0.0452(8) Uani 1 1 d . . . . .
N4 N 0.5000 0.5000 0.1116(2) 0.0411(10) Uani 1 2 d S T P . .
N5 N 0.5632(2) 0.5036(2) 0.15039(16) 0.0465(8) Uani 1 1 d . . . . .
N6 N 0.6967(3) 0.6062(3) 0.1912(2) 0.0602(11) Uani 1 1 d . . . . .
N7 N 0.7549(3) 0.5943(3) 0.2372(3) 0.0710(13) Uani 1 1 d . . . . .
N8 N 0.7983(2) 0.5278(2) 0.0882(2) 0.0583(10) Uani 1 1 d . . . . .
N9 N 0.8442(3) 0.5468(3) 0.1441(3) 0.0708(12) Uani 1 1 d . . . . .
N10 N 0.7193(3) 0.4354(3) 0.1918(2) 0.0609(11) Uani 1 1 d . . . . .
N11 N 0.7834(3) 0.4556(3) 0.2290(2) 0.0716(13) Uani 1 1 d . . . . .
C1 C 0.7054(3) 0.3654(3) 0.0234(2) 0.0458(10) Uani 1 1 d . . . . .
C2 C 0.7790(3) 0.3446(3) 0.0466(3) 0.0579(12) Uani 1 1 d . . . . .
H2 H 0.8045 0.3737 0.0800 0.069 Uiso 1 1 calc R U . . .
C3 C 0.8119(3) 0.2805(3) 0.0188(3) 0.0623(13) Uani 1 1 d . . . . .
C4 C 0.8924(4) 0.2593(5) 0.0410(4) 0.092(2) Uani 1 1 d . . . . .
H4A H 0.8940 0.2061 0.0532 0.137 Uiso 1 1 calc R U . . .
H4B H 0.9069 0.2895 0.0808 0.137 Uiso 1 1 calc R U . . .
H4C H 0.9271 0.2689 0.0031 0.137 Uiso 1 1 calc R U . . .
C5 C 0.7714(3) 0.2339(3) -0.0304(3) 0.0617(13) Uani 1 1 d . . . . .
C6 C 0.8059(4) 0.1603(4) -0.0576(4) 0.0875(19) Uani 1 1 d . . . . .
H6A H 0.7727 0.1385 -0.0922 0.131 Uiso 1 1 calc R U . . .
H6B H 0.8121 0.1249 -0.0196 0.131 Uiso 1 1 calc R U . . .
H6C H 0.8549 0.1708 -0.0782 0.131 Uiso 1 1 calc R U . . .
C7 C 0.7002(3) 0.2535(3) -0.0527(3) 0.0554(11) Uani 1 1 d . . . . .
H7 H 0.6739 0.2234 -0.0847 0.067 Uiso 1 1 calc R U . . .
C8 C 0.6673(2) 0.3215(3) -0.0254(2) 0.0452(10) Uani 1 1 d . . . . .
C9 C 0.5392(3) 0.5022(3) 0.21902(19) 0.0483(10) Uani 1 1 d . . . . .
C10 C 0.5805(3) 0.5054(3) 0.2821(2) 0.0574(12) Uani 1 1 d . . . . .
H10 H 0.6336 0.5089 0.2820 0.069 Uiso 1 1 calc R U . . .
C11 C 0.5402(3) 0.5033(3) 0.3438(2) 0.0570(11) Uani 1 1 d . . . . .
C12 C 0.5832(4) 0.5099(4) 0.4114(2) 0.0777(17) Uani 1 1 d . . . . .
H12A H 0.5643 0.5529 0.4374 0.117 Uiso 1 1 calc R U . . .
H12B H 0.6366 0.5170 0.4019 0.117 Uiso 1 1 calc R U . . .
H12C H 0.5762 0.4640 0.4383 0.117 Uiso 1 1 calc R U . . .
C13 C 0.6516(4) 0.6596(4) 0.2188(3) 0.0731(16) Uani 1 1 d . . . . .
C14 C 0.5817(4) 0.6896(4) 0.1832(4) 0.0864(19) Uani 1 1 d . . . . .
H14A H 0.5499 0.7152 0.2168 0.130 Uiso 1 1 calc R U . . .
H14B H 0.5539 0.6479 0.1628 0.130 Uiso 1 1 calc R U . . .
H14C H 0.5964 0.7249 0.1472 0.130 Uiso 1 1 calc R U . . .
C15 C 0.6799(5) 0.6810(4) 0.2847(4) 0.091(2) Uani 1 1 d . . . . .
H15 H 0.6589 0.7168 0.3151 0.110 Uiso 1 1 calc R U . . .
C16 C 0.7434(5) 0.6394(4) 0.2947(3) 0.087(2) Uani 1 1 d . . . . .
C17 C 0.7966(6) 0.6328(6) 0.3579(4) 0.121(3) Uani 1 1 d . . . . .
H17A H 0.7791 0.6662 0.3944 0.182 Uiso 1 1 calc R U . . .
H17B H 0.8476 0.6469 0.3444 0.182 Uiso 1 1 calc R U . . .
H17C H 0.7965 0.5810 0.3746 0.182 Uiso 1 1 calc R U . . .
C18 C 0.6972(4) 0.3670(4) 0.2174(3) 0.0729(16) Uani 1 1 d . . . . .
C19 C 0.6285(5) 0.3266(4) 0.1896(4) 0.097(2) Uani 1 1 d . . . . .
H19A H 0.6379 0.2725 0.1888 0.146 Uiso 1 1 calc R U . . .
H19B H 0.6180 0.3442 0.1430 0.146 Uiso 1 1 calc R U . . .
H19C H 0.5853 0.3371 0.2191 0.146 Uiso 1 1 calc R U . . .
C20 C 0.7452(5) 0.3456(5) 0.2712(4) 0.094(2) Uani 1 1 d . . . . .
H20 H 0.7422 0.3009 0.2974 0.113 Uiso 1 1 calc R U . . .
C21 C 0.7976(5) 0.4019(5) 0.2788(4) 0.088(2) Uani 1 1 d . . . . .
C22 C 0.8636(6) 0.4085(6) 0.3294(5) 0.132(4) Uani 1 1 d . . . . .
H22A H 0.8524 0.3796 0.3709 0.198 Uiso 1 1 calc R U . . .
H22B H 0.8712 0.4612 0.3415 0.198 Uiso 1 1 calc R U . . .
H22C H 0.9092 0.3887 0.3079 0.198 Uiso 1 1 calc R U . . .
C23 C 0.8379(3) 0.5394(3) 0.0302(3) 0.0674(14) Uani 1 1 d . . . . .
C24 C 0.8051(4) 0.5241(4) -0.0408(3) 0.0787(17) Uani 1 1 d . . . . .
H24A H 0.8442 0.5305 -0.0755 0.118 Uiso 1 1 calc R U . . .
H24B H 0.7642 0.5594 -0.0498 0.118 Uiso 1 1 calc R U . . .
H24C H 0.7858 0.4728 -0.0426 0.118 Uiso 1 1 calc R U . . .
C25 C 0.9099(4) 0.5681(5) 0.0487(5) 0.100(2) Uani 1 1 d . . . . .
H25 H 0.9488 0.5820 0.0181 0.120 Uiso 1 1 calc R U . . .
C26 C 0.9122(4) 0.5717(5) 0.1207(4) 0.093(2) Uani 1 1 d . . . . .
C27 C 0.9751(5) 0.6014(8) 0.1666(5) 0.150(4) Uani 1 1 d . . . . .
H27A H 1.0179 0.6160 0.1381 0.224 Uiso 1 1 calc R U . . .
H27B H 0.9906 0.5622 0.1988 0.224 Uiso 1 1 calc R U . . .
H27C H 0.9571 0.6451 0.1922 0.224 Uiso 1 1 calc R U . . .
 
loop_
 _atom_site_aniso_label
 _atom_site_aniso_U_11
 _atom_site_aniso_U_22
 _atom_site_aniso_U_33
 _atom_site_aniso_U_23
 _atom_site_aniso_U_13
 _atom_site_aniso_U_12
Co1 0.0450(4) 0.0450(4) 0.0221(4) 0.000 0.000 0.000
Co2 0.0483(3) 0.0559(4) 0.0326(3) 0.0015(2) -0.0050(3) -0.0027(3)
B1 0.062(4) 0.100(5) 0.056(3) 0.007(3) -0.019(3) -0.003(4)
N1 0.050(2) 0.050(2) 0.0357(19) 0.0018(16) -0.0031(16) -0.0014(17)
N2 0.0445(18) 0.0447(18) 0.0307(15) -0.0002(15) 0.0019(15) 0.0019(14)
N3 0.051(2) 0.048(2) 0.0373(19) -0.0050(17) 0.0003(15) 0.0037(16)
N4 0.044(2) 0.054(3) 0.025(2) 0.000 0.000 -0.002(2)
N5 0.0485(19) 0.063(2) 0.0280(15) -0.0024(18) -0.0025(14) -0.0017(18)
N6 0.065(3) 0.070(3) 0.045(2) -0.006(2) -0.009(2) -0.007(2)
N7 0.068(3) 0.087(3) 0.058(3) -0.008(2) -0.016(2) -0.012(3)
N8 0.051(2) 0.069(3) 0.055(2) 0.0045(19) -0.0003(19) -0.0020(19)
N9 0.049(2) 0.089(3) 0.074(3) 0.010(2) -0.010(2) -0.009(2)
N10 0.065(3) 0.071(3) 0.046(2) 0.008(2) -0.005(2) 0.004(2)
N11 0.070(3) 0.093(3) 0.052(3) 0.014(2) -0.016(2) 0.003(2)
C1 0.049(2) 0.049(2) 0.040(2) 0.0064(18) 0.0000(18) 0.0014(19)
C2 0.054(3) 0.063(3) 0.057(3) 0.010(2) -0.003(2) 0.003(2)
C3 0.057(3) 0.068(3) 0.062(3) 0.012(2) 0.000(2) 0.013(3)
C4 0.060(4) 0.110(5) 0.105(6) 0.001(4) -0.009(3) 0.027(4)
C5 0.062(3) 0.064(3) 0.060(3) 0.006(2) 0.013(2) 0.012(3)
C6 0.085(4) 0.087(4) 0.091(5) -0.003(4) 0.002(4) 0.034(4)
C7 0.055(3) 0.058(3) 0.054(3) -0.003(2) 0.004(2) 0.004(2)
C8 0.041(2) 0.052(2) 0.042(2) 0.0044(19) 0.0054(17) 0.006(2)
C9 0.066(2) 0.053(2) 0.0261(17) 0.001(2) -0.0028(17) -0.003(2)
C10 0.063(3) 0.076(3) 0.034(2) -0.001(2) -0.005(2) -0.001(3)
C11 0.078(3) 0.067(3) 0.0267(18) -0.001(2) -0.0028(19) 0.007(3)
C12 0.099(4) 0.100(4) 0.033(2) 0.005(3) -0.008(3) 0.005(4)
C13 0.088(4) 0.073(4) 0.059(3) -0.013(3) 0.002(3) -0.007(3)
C14 0.095(5) 0.070(4) 0.094(5) -0.013(3) -0.001(4) 0.015(3)
C15 0.121(6) 0.081(4) 0.072(4) -0.023(3) -0.006(4) -0.006(4)
C16 0.109(5) 0.089(5) 0.062(4) -0.018(3) -0.011(4) -0.023(4)
C17 0.135(7) 0.153(8) 0.076(5) -0.030(5) -0.029(5) -0.030(6)
C18 0.082(4) 0.075(4) 0.061(3) 0.016(3) 0.007(3) 0.008(3)
C19 0.117(6) 0.075(4) 0.100(5) 0.026(4) 0.000(4) -0.011(4)
C20 0.112(6) 0.094(5) 0.077(5) 0.033(4) -0.001(4) 0.019(5)
C21 0.103(5) 0.098(5) 0.062(4) 0.018(3) -0.018(4) 0.028(4)
C22 0.139(8) 0.160(8) 0.097(6) 0.026(6) -0.054(6) 0.034(7)
C23 0.069(4) 0.063(3) 0.070(3) 0.013(3) 0.010(3) 0.003(3)
C24 0.093(4) 0.084(4) 0.059(3) 0.011(3) 0.024(3) -0.001(3)
C25 0.063(4) 0.120(6) 0.116(6) 0.018(5) 0.027(4) -0.016(4)
C26 0.056(3) 0.129(6) 0.095(5) 0.008(5) -0.005(3) -0.016(3)
C27 0.082(5) 0.227(12) 0.141(8) 0.019(8) -0.025(5) -0.056(7)
 
_geom_special_details
;
 All esds (except the esd in the dihedral angle between two l.s. planes)
 are estimated using the full covariance matrix.  The cell esds are taken
 into account individually in the estimation of esds in distances, angles
 and torsion angles; correlations between esds in cell parameters are only
 used when they are defined by crystal symmetry.  An approximate (isotropic)
 treatment of cell esds is used for estimating esds involving l.s. planes.
;
 
loop_
 _geom_bond_atom_site_label_1
 _geom_bond_atom_site_label_2
 _geom_bond_distance
 _geom_bond_site_symmetry_2
 _geom_bond_publ_flag
Co1 N4 2.133(4) 3_565 ?
Co1 N4 2.133(4) . ?
Co1 N2 2.202(3) . ?
Co1 N2 2.202(3) 4_655 ?
Co1 N2 2.202(3) 3_565 ?
Co1 N2 2.202(3) 2_665 ?
Co2 N1 2.131(4) . ?
Co2 N3 2.135(4) 4_655 ?
Co2 N5 2.136(4) . ?
Co2 N10 2.161(4) . ?
Co2 N8 2.170(4) . ?
Co2 N6 2.201(4) . ?
B1 N11 1.516(9) . ?
B1 N7 1.533(9) . ?
B1 N9 1.544(9) . ?
N1 N2 1.339(5) . ?
N1 C1 1.365(6) . ?
N2 N3 1.328(5) . ?
N3 C8 1.368(6) . ?
N3 Co2 2.135(4) 3_565 ?
N4 N5 1.331(4) . ?
N4 N5 1.331(4) 2_665 ?
N5 C9 1.377(5) . ?
N6 C13 1.331(7) . ?
N6 N7 1.361(6) . ?
N7 C16 1.368(8) . ?
N8 C23 1.322(7) . ?
N8 N9 1.377(6) . ?
N9 C26 1.342(8) . ?
N10 C18 1.349(8) . ?
N10 N11 1.372(7) . ?
N11 C21 1.360(8) . ?
C1 C8 1.380(7) . ?
C1 C2 1.409(7) . ?
C2 C3 1.368(7) . ?
C3 C5 1.432(8) . ?
C3 C4 1.515(8) . ?
C5 C7 1.360(7) . ?
C5 C6 1.514(8) . ?
C7 C8 1.419(7) . ?
C9 C9 1.374(10) 2_665 ?
C9 C10 1.405(6) . ?
C10 C11 1.375(6) . ?
C11 C11 1.412(11) 2_665 ?
C11 C12 1.499(7) . ?
C13 C15 1.402(9) . ?
C13 C14 1.494(9) . ?
C15 C16 1.342(11) . ?
C16 C17 1.528(10) . ?
C18 C20 1.379(10) . ?
C18 C19 1.492(10) . ?
C20 C21 1.351(11) . ?
C21 C22 1.511(10) . ?
C23 C25 1.400(9) . ?
C23 C24 1.496(8) . ?
C25 C26 1.378(10) . ?
C26 C27 1.500(11) . ?
 
loop_
 _geom_angle_atom_site_label_1
 _geom_angle_atom_site_label_2
 _geom_angle_atom_site_label_3
 _geom_angle
 _geom_angle_site_symmetry_1
 _geom_angle_site_symmetry_3
 _geom_angle_publ_flag
N4 Co1 N4 180.0 3_565 . ?
N4 Co1 N2 90.32(11) 3_565 . ?
N4 Co1 N2 89.68(11) . . ?
N4 Co1 N2 89.68(11) 3_565 4_655 ?
N4 Co1 N2 90.32(11) . 4_655 ?
N2 Co1 N2 90.003(2) . 4_655 ?
N4 Co1 N2 89.68(11) 3_565 3_565 ?
N4 Co1 N2 90.32(11) . 3_565 ?
N2 Co1 N2 90.001(1) . 3_565 ?
N2 Co1 N2 179.4(2) 4_655 3_565 ?
N4 Co1 N2 90.32(11) 3_565 2_665 ?
N4 Co1 N2 89.68(11) . 2_665 ?
N2 Co1 N2 179.4(2) . 2_665 ?
N2 Co1 N2 90.002(1) 4_655 2_665 ?
N2 Co1 N2 90.002(2) 3_565 2_665 ?
N1 Co2 N3 90.46(13) . 4_655 ?
N1 Co2 N5 90.45(14) . . ?
N3 Co2 N5 91.18(15) 4_655 . ?
N1 Co2 N10 92.52(16) . . ?
N3 Co2 N10 175.81(16) 4_655 . ?
N5 Co2 N10 91.74(16) . . ?
N1 Co2 N8 94.24(15) . . ?
N3 Co2 N8 92.63(15) 4_655 . ?
N5 Co2 N8 173.93(14) . . ?
N10 Co2 N8 84.22(17) . . ?
N1 Co2 N6 179.63(17) . . ?
N3 Co2 N6 89.64(16) 4_655 . ?
N5 Co2 N6 89.19(16) . . ?
N10 Co2 N6 87.39(17) . . ?
N8 Co2 N6 86.11(17) . . ?
N11 B1 N7 109.0(5) . . ?
N11 B1 N9 110.4(6) . . ?
N7 B1 N9 109.2(5) . . ?
N2 N1 C1 106.8(4) . . ?
N2 N1 Co2 124.6(3) . . ?
C1 N1 Co2 128.6(3) . . ?
N3 N2 N1 111.4(3) . . ?
N3 N2 Co1 123.8(3) . . ?
N1 N2 Co1 124.7(3) . . ?
N2 N3 C8 106.7(4) . . ?
N2 N3 Co2 125.9(3) . 3_565 ?
C8 N3 Co2 127.3(3) . 3_565 ?
N5 N4 N5 112.4(4) . 2_665 ?
N5 N4 Co1 123.8(2) . . ?
N5 N4 Co1 123.8(2) 2_665 . ?
N4 N5 C9 106.1(3) . . ?
N4 N5 Co2 127.1(2) . . ?
C9 N5 Co2 126.8(3) . . ?
C13 N6 N7 107.1(5) . . ?
C13 N6 Co2 133.5(4) . . ?
N7 N6 Co2 115.7(4) . . ?
N6 N7 C16 108.8(5) . . ?
N6 N7 B1 119.6(5) . . ?
C16 N7 B1 131.6(6) . . ?
C23 N8 N9 107.9(4) . . ?
C23 N8 Co2 135.4(4) . . ?
N9 N8 Co2 114.6(3) . . ?
C26 N9 N8 109.7(5) . . ?
C26 N9 B1 129.3(5) . . ?
N8 N9 B1 121.0(4) . . ?
C18 N10 N11 105.9(5) . . ?
C18 N10 Co2 136.4(4) . . ?
N11 N10 Co2 117.7(4) . . ?
C21 N11 N10 109.5(5) . . ?
C21 N11 B1 129.9(6) . . ?
N10 N11 B1 119.4(5) . . ?
N1 C1 C8 107.3(4) . . ?
N1 C1 C2 132.0(5) . . ?
C8 C1 C2 120.7(4) . . ?
C3 C2 C1 118.3(5) . . ?
C2 C3 C5 120.9(5) . . ?
C2 C3 C4 118.8(6) . . ?
C5 C3 C4 120.3(5) . . ?
C7 C5 C3 121.0(5) . . ?
C7 C5 C6 118.2(6) . . ?
C3 C5 C6 120.8(5) . . ?
C5 C7 C8 117.9(5) . . ?
N3 C8 C1 107.8(4) . . ?
N3 C8 C7 131.0(4) . . ?
C1 C8 C7 121.2(4) . . ?
C9 C9 N5 107.7(2) 2_665 . ?
C9 C9 C10 121.0(3) 2_665 . ?
N5 C9 C10 131.2(4) . . ?
C11 C10 C9 118.1(5) . . ?
C10 C11 C11 120.9(3) . 2_665 ?
C10 C11 C12 118.8(5) . . ?
C11 C11 C12 120.4(3) 2_665 . ?
N6 C13 C15 109.6(6) . . ?
N6 C13 C14 123.3(6) . . ?
C15 C13 C14 127.1(6) . . ?
C16 C15 C13 106.0(6) . . ?
C15 C16 N7 108.6(6) . . ?
C15 C16 C17 131.2(7) . . ?
N7 C16 C17 120.1(7) . . ?
N10 C18 C20 109.6(6) . . ?
N10 C18 C19 121.4(6) . . ?
C20 C18 C19 128.9(7) . . ?
C21 C20 C18 107.2(6) . . ?
C20 C21 N11 107.7(6) . . ?
C20 C21 C22 130.0(7) . . ?
N11 C21 C22 122.3(7) . . ?
N8 C23 C25 108.3(6) . . ?
N8 C23 C24 122.1(5) . . ?
C25 C23 C24 129.5(6) . . ?
C26 C25 C23 107.1(6) . . ?
N9 C26 C25 107.0(6) . . ?
N9 C26 C27 124.5(7) . . ?
C25 C26 C27 128.4(7) . . ?
 
_refine_diff_density_max    0.449
_refine_diff_density_min   -0.217
_refine_diff_density_rms    0.064

_shelxl_version_number 2013-3

_shelx_res_file
;
TITL mo_TW_161_pp_2_0m in P-42(1)c
CELL 0.71073  17.48520  17.48520  19.10520  90.0000  90.0000  90.0000
ZERR 2 0.00060 0.00060 0.00060 0.0000 0.0000 0.0000
LATT -1
SYMM -X, -Y, Z
SYMM Y, -X, -Z
SYMM -Y, X, -Z
SYMM 0.5-X, 0.5+Y, 0.5-Z
SYMM 0.5+X, 0.5-Y, 0.5-Z
SYMM 0.5-Y, 0.5-X, 0.5+Z
SYMM 0.5+Y, 0.5+X, 0.5+Z
SFAC C  H  B  Co N
UNIT 216  272  8  10  84
LIST 6 ! automatically inserted. Change 6 to 4 for CHECKCIF!!
omit 0 2 0
omit 0 2 2
omit 0 4 1
omit 0 3 3
L.S. 10
ACTA
BOND
FMAP 2
PLAN 20
TEMP 10.180
WGHT    0.068000    1.262600
FVAR       0.06953
CO1   4    0.500000    0.500000    0.000000    10.25000    0.04501    0.04501 =
         0.02210    0.00000    0.00000    0.00000
CO2   4    0.678053    0.514770    0.113835    11.00000    0.04831    0.05595 =
         0.03264    0.00151   -0.00495   -0.00270
B1    3    0.816692    0.535012    0.220084    11.00000    0.06214    0.09962 =
         0.05597    0.00653   -0.01907   -0.00293
AFIX  13
H1    2    0.859930    0.541509    0.252175    11.00000   -1.20000
AFIX   0
N1    5    0.659375    0.426032    0.039324    11.00000    0.05020    0.04977 =
         0.03571    0.00183   -0.00314   -0.00143
N2    5    0.595938    0.418453    0.000638    11.00000    0.04446    0.04470 =
         0.03073   -0.00018    0.00190    0.00188
N3    5    0.598547    0.355908   -0.038747    11.00000    0.05065    0.04777 =
         0.03726   -0.00499    0.00029    0.00374
N4    5    0.500000    0.500000    0.111626    10.50000    0.04428    0.05388 =
         0.02517    0.00000    0.00000   -0.00213
N5    5    0.563162    0.503635    0.150386    11.00000    0.04851    0.06306 =
         0.02804   -0.00237   -0.00251   -0.00170
N6    5    0.696663    0.606208    0.191155    11.00000    0.06482    0.07040 =
         0.04548   -0.00625   -0.00883   -0.00731
N7    5    0.754909    0.594324    0.237160    11.00000    0.06841    0.08685 =
         0.05773   -0.00827   -0.01625   -0.01172
N8    5    0.798271    0.527763    0.088198    11.00000    0.05074    0.06877 =
         0.05525    0.00450   -0.00032   -0.00199
N9    5    0.844247    0.546826    0.144086    11.00000    0.04947    0.08929 =
         0.07376    0.00980   -0.01044   -0.00938
N10   5    0.719347    0.435376    0.191820    11.00000    0.06535    0.07115 =
         0.04616    0.00766   -0.00463    0.00394
N11   5    0.783377    0.455581    0.229030    11.00000    0.06981    0.09293 =
         0.05193    0.01353   -0.01558    0.00259
C1    1    0.705400    0.365394    0.023414    11.00000    0.04853    0.04866 =
         0.04035    0.00640   -0.00004    0.00140
C2    1    0.778986    0.344620    0.046628    11.00000    0.05434    0.06263 =
         0.05664    0.00990   -0.00336    0.00335
AFIX  43
H2    2    0.804517    0.373749    0.079988    11.00000   -1.20000
AFIX   0
C3    1    0.811911    0.280494    0.018829    11.00000    0.05687    0.06782 =
         0.06208    0.01241    0.00012    0.01319
C4    1    0.892350    0.259320    0.041019    11.00000    0.06049    0.10951 =
         0.10497    0.00058   -0.00912    0.02694
AFIX 137
H4A   2    0.894036    0.206082    0.053204    11.00000   -1.50000
H4B   2    0.906910    0.289527    0.080806    11.00000   -1.50000
H4C   2    0.927078    0.268934    0.003107    11.00000   -1.50000
AFIX   0
C5    1    0.771409    0.233927   -0.030411    11.00000    0.06195    0.06358 =
         0.05968    0.00636    0.01289    0.01243
C6    1    0.805910    0.160284   -0.057571    11.00000    0.08530    0.08661 =
         0.09059   -0.00296    0.00181    0.03392
AFIX 137
H6A   2    0.772673    0.138456   -0.092219    11.00000   -1.50000
H6B   2    0.812059    0.124912   -0.019555    11.00000   -1.50000
H6C   2    0.854879    0.170780   -0.078164    11.00000   -1.50000
AFIX   0
C7    1    0.700204    0.253545   -0.052662    11.00000    0.05471    0.05756 =
         0.05403   -0.00261    0.00429    0.00437
AFIX  43
H7    2    0.673905    0.223386   -0.084730    11.00000   -1.20000
AFIX   0
C8    1    0.667268    0.321499   -0.025412    11.00000    0.04108    0.05224 =
         0.04224    0.00435    0.00538    0.00574
C9    1    0.539228    0.502193    0.219019    11.00000    0.06568    0.05323 =
         0.02612    0.00134   -0.00278   -0.00306
C10   1    0.580526    0.505428    0.282053    11.00000    0.06252    0.07562 =
         0.03408   -0.00055   -0.00492   -0.00129
AFIX  43
H10   2    0.633602    0.508881    0.281988    11.00000   -1.20000
AFIX   0
C11   1    0.540241    0.503344    0.343808    11.00000    0.07762    0.06679 =
         0.02665   -0.00124   -0.00276    0.00661
C12   1    0.583193    0.509891    0.411429    11.00000    0.09926    0.10038 =
         0.03342    0.00547   -0.00776    0.00514
AFIX 137
H12A  2    0.564262    0.552878    0.437446    11.00000   -1.50000
H12B  2    0.636626    0.516964    0.401858    11.00000   -1.50000
H12C  2    0.576205    0.464025    0.438297    11.00000   -1.50000
AFIX   0
C13   1    0.651619    0.659590    0.218823    11.00000    0.08753    0.07252 =
         0.05924   -0.01285    0.00199   -0.00734
C14   1    0.581703    0.689580    0.183202    11.00000    0.09536    0.06973 =
         0.09426   -0.01311   -0.00114    0.01477
AFIX 137
H14A  2    0.549922    0.715245    0.216775    11.00000   -1.50000
H14B  2    0.553861    0.647854    0.162775    11.00000   -1.50000
H14C  2    0.596406    0.724910    0.147170    11.00000   -1.50000
AFIX   0
C15   1    0.679893    0.681018    0.284658    11.00000    0.12108    0.08069 =
         0.07220   -0.02350   -0.00585   -0.00617
AFIX  43
H15   2    0.658881    0.716773    0.315135    11.00000   -1.20000
AFIX   0
C16   1    0.743450    0.639412    0.294716    11.00000    0.10945    0.08866 =
         0.06204   -0.01797   -0.01066   -0.02263
C17   1    0.796617    0.632751    0.357884    11.00000    0.13493    0.15263 =
         0.07586   -0.02983   -0.02945   -0.02969
AFIX 137
H17A  2    0.779142    0.666219    0.394365    11.00000   -1.50000
H17B  2    0.847585    0.646883    0.344404    11.00000   -1.50000
H17C  2    0.796531    0.580964    0.374574    11.00000   -1.50000
AFIX   0
C18   1    0.697182    0.366981    0.217445    11.00000    0.08244    0.07532 =
         0.06087    0.01623    0.00661    0.00770
C19   1    0.628464    0.326595    0.189579    11.00000    0.11701    0.07493 =
         0.09966    0.02597    0.00005   -0.01123
AFIX 137
H19A  2    0.637912    0.272518    0.188772    11.00000   -1.50000
H19B  2    0.617982    0.344175    0.142953    11.00000   -1.50000
H19C  2    0.585280    0.337106    0.219080    11.00000   -1.50000
AFIX   0
C20   1    0.745244    0.345628    0.271214    11.00000    0.11191    0.09369 =
         0.07691    0.03288   -0.00118    0.01924
AFIX  43
H20   2    0.742208    0.300874    0.297371    11.00000   -1.20000
AFIX   0
C21   1    0.797560    0.401851    0.278800    11.00000    0.10294    0.09811 =
         0.06250    0.01766   -0.01776    0.02801
C22   1    0.863617    0.408455    0.329400    11.00000    0.13918    0.16014 =
         0.09691    0.02593   -0.05447    0.03441
AFIX 137
H22A  2    0.852447    0.379646    0.370935    11.00000   -1.50000
H22B  2    0.871220    0.461200    0.341493    11.00000   -1.50000
H22C  2    0.909162    0.388717    0.307929    11.00000   -1.50000
AFIX   0
C23   1    0.837854    0.539382    0.030197    11.00000    0.06894    0.06335 =
         0.06987    0.01295    0.01025    0.00295
C24   1    0.805062    0.524149   -0.040779    11.00000    0.09267    0.08394 =
         0.05936    0.01120    0.02432   -0.00065
AFIX 137
H24A  2    0.844202    0.530456   -0.075541    11.00000   -1.50000
H24B  2    0.764165    0.559437   -0.049777    11.00000   -1.50000
H24C  2    0.785776    0.472781   -0.042562    11.00000   -1.50000
AFIX   0
C25   1    0.909869    0.568058    0.048660    11.00000    0.06339    0.11978 =
         0.11579    0.01793    0.02709   -0.01573
AFIX  43
H25   2    0.948803    0.582037    0.018063    11.00000   -1.20000
AFIX   0
C26   1    0.912198    0.571667    0.120662    11.00000    0.05624    0.12911 =
         0.09466    0.00777   -0.00543   -0.01636
C27   1    0.975098    0.601421    0.166556    11.00000    0.08180    0.22661 =
         0.14058    0.01888   -0.02510   -0.05642
AFIX 137
H27A  2    1.017928    0.616029    0.138102    11.00000   -1.50000
H27B  2    0.990552    0.562209    0.198757    11.00000   -1.50000
H27C  2    0.957078    0.645072    0.192186    11.00000   -1.50000
AFIX   0
HKLF 4

REM  mo_TW_161_pp_2_0m in P-42(1)c
REM R1 =  0.0378 for    4664 Fo > 4sig(Fo)  and  0.0457 for all    5177 data
REM    368 parameters refined using      0 restraints

END

WGHT      0.0674      1.1230

REM Highest difference peak  0.449,  deepest hole -0.217,  1-sigma level  0.064
Q1    1   0.6581  0.5139  0.1105  11.00000  0.05    0.36
Q2    1   0.6622  0.4689  0.1076  11.00000  0.05    0.34
Q3    1   0.7175  0.5061  0.0882  11.00000  0.05    0.29
Q4    1   0.7767  0.6300  0.2022  11.00000  0.05    0.26
Q5    1   0.7950  0.4958  0.2106  11.00000  0.05    0.25
Q6    1   0.6837  0.3118  0.0115  11.00000  0.05    0.24
Q7    1   0.7597  0.3104  0.2320  11.00000  0.05    0.23
Q8    1   0.7592  0.6708  0.2480  11.00000  0.05    0.23
Q9    1   0.7220  0.5387  0.1454  11.00000  0.05    0.22
Q10   1   0.6780  0.5695  0.0913  11.00000  0.05    0.22
Q11   1   0.5615  0.3391 -0.0644  11.00000  0.05    0.22
Q12   1   0.7207  0.7293  0.2424  11.00000  0.05    0.21
Q13   1   0.8045  0.4475  0.2598  11.00000  0.05    0.21
Q14   1   0.8087  0.4216  0.2000  11.00000  0.05    0.20
Q15   1   0.6784  0.5696  0.1579  11.00000  0.05    0.20
Q16   1   0.7673  0.2193 -0.0101  11.00000  0.05    0.19
Q17   1   0.7356  0.2729  0.2563  11.00000  0.05    0.19
Q18   1   0.6989  0.6022  0.2159  11.00000  0.05    0.19
Q19   1   0.6806  0.6955  0.2235  11.00000  0.05    0.18
Q20   1   0.8382  0.5004  0.1210  11.00000  0.05    0.18
;
_shelx_res_checksum   72376

_shelx_hkl_file
;
   2   1   0    1.45    0.11
   1  -2   0    1.48    0.11
   2   1   0    1.35    0.10
   1  -2   0    1.41    0.11
  -1   2   0    1.58    0.12
  -1   2   0    1.37    0.11
  -2  -1   0    1.42    0.10
  -2  -1   0    1.47    0.11
   2   0   0    0.37    0.06
   0   2   0    0.45    0.06
  -2   0   0    0.43    0.07
  -1  -2   0    1.46    0.09
  -2   1   0    1.59    0.10
  -2   1   0    1.47    0.12
   2  -1   0    1.54    0.13
  -1  -2   0    1.58    0.11
   2  -1   0    1.40    0.11
   1   2   0    1.47    0.09
   1   2   0    1.52    0.11
  -1  -2   0    1.46    0.11
   2  -1   0    1.58    0.11
  -2  -2   0   21.94    0.82
   2  -2   0   21.54    0.82
  -2  -2   0   21.78    0.83
   2   2   0   21.55    0.83
  -2   2   0   21.70    0.82
   2   2   0   20.86    0.82
  -2  -2   0   22.29    0.79
   2   2   0   21.85    0.79
  -2   2   0   21.17    0.83
   2  -2   0   20.70    0.83
   2  -3   0   75.12    2.74
   2  -3   0   71.70    2.72
   3   2   0   75.46    2.72
  -2   3   0   72.44    2.72
  -3  -2   0   74.43    2.73
  -3  -2   0   73.85    2.72
   3   2   0   72.82    2.62
   3   2   0   72.93    2.73
  -2   3   0   74.63    2.74
  -3  -2   0   73.94    2.62
   1  -3   0   20.47    0.82
   3   1   0   20.62    0.81
  -1   3   0   21.25    0.81
  -1   3   0   22.21    0.82
  -1   3   0   21.11    0.82
   3   1   0   21.54    0.79
   3   1   0   21.21    0.82
  -3  -1   0   21.10    0.79
  -3  -1   0   20.04    0.81
  -3  -1   0   21.28    0.81
   1  -3   0   21.20    0.81
  -3   0   0   -0.01    0.07
  -3   0   0   -0.03    0.07
  -3   0   0   -0.01    0.06
   0   3   0   -0.02    0.06
   3   0   0    0.03    0.07
   0   3   0    0.09    0.08
   0  -3   0    0.07    0.07
   0   3   0   -0.06    0.05
   3   0   0   -0.04    0.07
   3   0   0    0.01    0.06
   0  -3   0    0.01    0.05
   0  -3   0   -0.02    0.07
  -1  -3   0   21.25    0.80
  -3   1   0   21.25    0.82
  -3   1   0   21.69    0.82
  -3   1   0   20.88    0.81
   3  -1   0   21.04    0.82
   3  -1   0   21.46    0.81
  -1  -3   0   21.61    0.82
  -1  -3   0   20.50    0.81
  -1  -3   0   21.28    0.78
   3  -1   0   21.70    0.82
   1   3   0   20.34    0.81
  -3   2   0   72.03    2.71
  -3   2   0   74.38    2.70
   3  -2   0   74.38    2.62
   3  -2   0   73.23    2.70
   2   3   0   72.49    2.70
  -2  -3   0   73.87    2.70
   2   3   0   71.94    2.69
  -2  -3   0   74.92    2.70
   3  -2   0   70.91    2.71
  -2  -3   0   71.71    2.59
   2   3   0   73.97    2.59
   3  -3   0  478.87   17.40
   3   3   0  461.14   17.27
  -3   3   0  490.86   17.38
   3   3   0  455.43   16.60
   3   3   0  458.28   17.26
   3  -3   0  476.27   17.32
  -3  -3   0  456.16   16.63
  -3   3   0  473.98   17.39
  -3  -3   0  478.51   17.33
  -3  -3   0  475.27   17.35
  -3   4   0   10.16    0.47
   3  -4   0   10.79    0.50
  -4  -3   0   10.94    0.47
   3  -4   0   10.27    0.47
  -4  -3   0   10.38    0.45
   4   3   0   10.88    0.48
   4   3   0   10.14    0.45
   4   3   0   10.43    0.47
  -3   4   0   10.76    0.49
   2  -4   0   47.92    1.84
  -4  -2   0   49.88    1.83
  -2   4   0   47.53    1.82
   4   2   0   48.77    1.83
  -4  -2   0   47.85    1.83
   4   2   0   47.42    1.83
   4   2   0   48.18    1.76
  -2   4   0   49.72    1.84
  -4  -2   0   49.17    1.77
   2  -4   0   49.37    1.83
   4   1   0   35.67    1.36
   1  -4   0   34.85    1.35
   4   1   0   34.08    1.36
  -1   4   0   35.96    1.35
  -4  -1   0   35.57    1.36
  -4  -1   0   36.62    1.36
  -1   4   0   35.37    1.37
   1  -4   0   35.97    1.37
   4   1   0   36.58    1.32
  -1   4   0   36.81    1.36
  -4  -1   0   36.00    1.32
   0  -4   0   57.00    2.05
  -4   0   0   54.41    2.08
   0   4   0   54.95    2.09
  -4   0   0   56.17    2.02
   4   0   0   56.24    2.08
   4   0   0   56.82    2.02
  -4   0   0   55.73    2.08
   0   4   0   55.93    2.05
   0   4   0   56.17    2.07
   0  -4   0   53.71    2.08
   0  -4   0   55.63    2.07
   4   0   0   55.18    2.08
  -4   1   0   34.60    1.33
  -1  -4   0   35.38    1.36
  -4   1   0   34.35    1.36
  -4   1   0   35.72    1.36
  -1  -4   0   34.39    1.35
   4  -1   0   35.17    1.33
   1   4   0   36.41    1.35
   4  -1   0   37.00    1.36
   4  -1   0   37.23    1.37
   1   4   0   36.47    1.37
  -1  -4   0   35.57    1.33
  -4   2   0   51.82    1.87
  -2  -4   0   49.28    1.86
   2   4   0   48.25    1.85
   2   4   0   48.44    1.78
   4  -2   0   48.89    1.87
  -2  -4   0   50.13    1.78
  -4   2   0   48.55    1.85
   4  -2   0   49.55    1.86
   4  -2   0   51.00    1.82
   2   4   0   47.83    1.86
  -2  -4   0   49.52    1.85
  -3  -4   0   10.63    0.45
  -4   3   0   10.29    0.49
   4  -3   0   10.54    0.49
  -3  -4   0   11.14    0.47
  -4   3   0   10.21    0.47
   4  -3   0   10.78    0.48
   3   4   0   10.79    0.49
   3   4   0   10.65    0.47
   3   4   0   10.48    0.44
   4  -3   0   10.82    0.49
  -3  -4   0   10.42    0.48
   4  -4   0    8.11    0.42
   4   4   0    8.52    0.37
  -4   4   0    7.87    0.42
   4   4   0    7.94    0.41
   4  -4   0    7.75    0.40
  -4  -4   0    7.64    0.39
  -4  -4   0    8.18    0.37
  -4  -4   0    7.95    0.40
  -4   4   0    7.97    0.39
   4   4   0    8.13    0.39
   5   4   0   10.86    0.52
  -5  -4   0   10.40    0.51
   4  -5   0   10.75    0.51
  -4   5   0   11.03    0.53
  -4   5   0   11.08    0.51
  -5  -4   0   11.69    0.50
   5   4   0   11.51    0.49
   4  -5   0   11.09    0.54
   5   3   0    9.06    0.45
  -3   5   0    9.12    0.45
   3  -5   0    9.32    0.46
  -5  -3   0    8.83    0.42
   3  -5   0    9.54    0.44
  -3   5   0    9.09    0.44
   5   3   0    9.20    0.44
  -5  -3   0    8.78    0.43
   5   3   0    9.61    0.42
   2  -5   0    5.76    0.34
   5   2   0    5.29    0.31
  -2   5   0    5.83    0.34
  -5  -2   0    5.67    0.32
  -5  -2   0    5.75    0.31
   5   2   0    6.27    0.32
  -5  -2   0    6.19    0.32
  -2   5   0    5.59    0.32
  -2   5   0    5.77    0.30
   2  -5   0    5.76    0.32
   5   1   0  185.49    6.61
  -1   5   0  200.26    6.96
  -5  -1   0  196.15    6.96
   1  -5   0  184.52    6.85
   1  -5   0  185.25    6.86
  -5  -1   0  192.33    6.96
   5   1   0  182.48    6.85
  -5  -1   0  181.05    6.61
   5   1   0  172.49    6.85
  -1   5   0  178.74    6.86
  -1   5   0  201.18    6.95
  -5   0   0   -0.18    0.09
   5   0   0   -0.16    0.10
  -5   0   0    0.27    0.13
   0  -5   0   -0.19    0.09
  -5   0   0   -0.18    0.10
   0  -5   0   -0.22    0.10
   5   0   0   -0.19    0.10
   0   5   0   -0.07    0.09
   5   0   0   -0.17    0.11
   0   5   0   -0.11    0.07
   0  -5   0   -0.03    0.07
   0   5   0   -0.14    0.11
   5  -1   0  183.40    6.64
  -1  -5   0  182.64    6.87
  -1  -5   0  178.48    6.86
   1   5   0  195.97    6.94
  -1  -5   0  194.12    6.92
  -5   1   0  186.57    6.87
   5  -1   0  193.27    6.93
   1   5   0  183.12    6.88
   5  -1   0  181.79    6.88
  -5   1   0  184.51    6.64
  -5   1   0  201.36    7.03
  -2  -5   0    5.88    0.32
  -5   2   0    6.36    0.34
   2   5   0    6.33    0.32
   5  -2   0    5.78    0.36
  -2  -5   0    6.36    0.30
   5  -2   0    6.25    0.33
  -2  -5   0    6.20    0.34
  -2  -5   0    5.85    0.28
   5  -2   0    6.47    0.34
  -5   2   0    5.77    0.32
  -3  -5   0    9.17    0.45
  -5   3   0    9.01    0.46
   3   5   0    9.48    0.44
   5  -3   0    9.27    0.47
   3   5   0    9.19    0.46
  -3  -5   0    9.10    0.44
  -3  -5   0    9.15    0.41
  -5   3   0    9.65    0.44
   5  -3   0    9.54    0.46
   5  -3   0    9.40    0.45
   3   5   0    9.42    0.41
  -5   4   0   11.22    0.52
  -4  -5   0   11.00    0.52
   5  -4   0   11.17    0.54
   5  -4   0   11.00    0.54
  -4  -5   0   11.33    0.51
   4   5   0   11.36    0.53
  -4  -5   0   11.38    0.49
   4   5   0   10.65    0.50
   4   5   0   11.03    0.48
   5  -4   0   11.42    0.52
   5  -5   0   10.71    0.50
  -5   5   0    9.94    0.49
   5   5   0   10.49    0.47
   5   5   0   10.47    0.52
  -5  -5   0   10.08    0.50
   5   5   0    9.93    0.49
  -5   5   0    9.83    0.50
   5  -5   0    9.80    0.52
  -5  -5   0   10.42    0.47
   6   5   0    6.02    0.39
   5  -6   0    6.10    0.38
  -6  -5   0    6.42    0.39
  -5   6   0    6.12    0.41
  -6  -5   0    6.61    0.37
   6   5   0    6.04    0.35
   5  -6   0    6.34    0.41
  -6  -5   0    6.53    0.38
   6   5   0    6.45    0.38
  -5   6   0    5.79    0.37
   4  -6   0   41.90    1.65
   6   4   0   39.05    1.61
   4  -6   0   41.61    1.62
  -4   6   0   42.46    1.62
  -4   6   0   43.69    1.65
  -6  -4   0   42.25    1.62
   6   4   0   41.30    1.63
   6   4   0   41.71    1.56
  -6  -4   0   42.39    1.57
  -6  -4   0   41.31    1.63
   3  -6   0    4.38    0.30
  -6  -3   0    4.40    0.30
  -6  -3   0    3.95    0.29
   3  -6   0    4.05    0.32
  -3   6   0    4.48    0.33
   6   3   0    3.98    0.28
  -3   6   0    4.04    0.28
   6   3   0    3.71    0.27
  -6  -3   0    4.18    0.29
   6   2   0   57.28    2.10
  -2   6   0   55.63    2.16
   6   2   0   56.15    2.17
  -2   6   0   56.01    2.15
  -2   6   0   57.33    2.19
  -6  -2   0   57.78    2.11
   2  -6   0   58.56    2.19
  -6  -2   0   57.33    2.17
   6   2   0   56.71    2.17
   2  -6   0   57.32    2.16
  -6  -2   0   58.97    2.17
  -6  -1   0   17.31    0.72
   6   1   0   17.41    0.72
   1  -6   0   17.18    0.72
  -1   6   0   17.12    0.72
  -1   6   0   16.99    0.69
  -1   6   0   16.67    0.74
  -6  -1   0   17.27    0.73
   6   1   0   16.85    0.73
   1  -6   0   16.41    0.74
  -6  -1   0   17.18    0.72
   6   0   0  237.21    8.62
  -6   0   0  253.69    9.00
   6   0   0  236.30    8.94
  -6   0   0  233.99    8.63
   0   6   0  227.18    8.93
   0  -6   0  239.67    8.95
   0   6   0  252.38    8.97
   0   6   0  232.97    8.95
   0  -6   0  266.86    9.10
  -6   0   0  256.59    9.01
   0  -6   0  253.24    8.98
  -6   1   0   17.50    0.73
   6  -1   0   17.80    0.74
  -6   1   0   17.57    0.76
   6  -1   0   17.74    0.75
   6  -1   0   16.81    0.74
   1   6   0   17.13    0.69
  -6   1   0   17.44    0.74
  -1  -6   0   16.84    0.69
  -1  -6   0   17.61    0.73
   2   6   0   57.08    2.19
   6  -2   0   57.96    2.18
   2   6   0   57.40    2.17
   6  -2   0   56.92    2.14
  -6   2   0   57.96    2.18
  -2  -6   0   57.99    2.14
  -2  -6   0   58.54    2.09
  -6   2   0   55.94    2.19
  -2  -6   0   58.00    2.19
  -2  -6   0   58.50    2.17
  -6   2   0   57.28    2.14
   6  -2   0   56.87    2.19
   6  -3   0    4.51    0.32
   6  -3   0    4.21    0.33
   3   6   0    4.75    0.32
   6  -3   0    4.42    0.31
  -3  -6   0    4.59    0.31
  -6   3   0    4.52    0.30
  -6   3   0    4.52    0.32
  -3  -6   0    4.34    0.27
  -4  -6   0   42.28    1.65
   4   6   0   44.27    1.64
  -6   4   0   42.31    1.66
   4   6   0   42.28    1.57
   6  -4   0   42.06    1.63
   6  -4   0   42.06    1.64
   4   6   0   42.75    1.66
  -4  -6   0   40.67    1.57
   6  -4   0   42.12    1.66
  -4  -6   0   43.33    1.64
  -6   4   0   40.99    1.64
   6  -5   0    6.16    0.40
  -5  -6   0    6.52    0.38
  -5  -6   0    5.95    0.39
  -5  -6   0    5.84    0.35
   5   6   0    6.83    0.37
   5   6   0    6.24    0.40
   5   6   0    5.91    0.34
  -6   5   0    6.40    0.41
   6  -5   0    5.99    0.40
  -6   5   0    6.06    0.38
   6  -5   0    6.37    0.39
  -6  -6   0  107.78    3.98
  -6  -6   0  110.47    4.00
  -6  -6   0  106.44    3.83
   6  -6   0  104.76    3.98
   6   6   0  109.86    3.83
   6  -6   0  103.91    4.01
  -6   6   0  106.00    4.01
   6   6   0  104.55    3.98
   6   6   0  104.05    3.99
  -6   6   0  107.26    3.98
  -7  -6   0    0.54    0.18
  -7  -6   0    0.50    0.16
   7   6   0    0.54    0.19
  -7  -6   0    0.35    0.17
   6  -7   0    0.45    0.18
   6  -7   0    0.58    0.19
  -6   7   0    0.46    0.19
  -6   7   0    0.30    0.17
   7   6   0    0.29    0.15
   7   6   0    0.70    0.18
   5  -7   0   17.34    0.81
  -5   7   0   18.35    0.78
  -5   7   0   17.21    0.80
  -7  -5   0   16.45    0.75
   7   5   0   17.55    0.78
   7   5   0   16.92    0.79
   5  -7   0   17.87    0.79
  -7  -5   0   17.37    0.78
   7   5   0   17.50    0.75
  -7  -5   0   18.35    0.78
  -7  -4   0    1.80    0.25
  -7  -4   0    1.42    0.19
   4  -7   0    1.35    0.21
   7   4   0    1.86    0.21
   7   4   0    1.60    0.23
  -4   7   0    1.65    0.24
   7   4   0    1.52    0.21
  -4   7   0    1.68    0.21
   4  -7   0    1.62    0.21
  -7  -4   0    1.80    0.21
  -3   7   0    0.92    0.16
  -7  -3   0    0.98    0.18
  -3   7   0    1.18    0.17
   7   3   0    0.88    0.15
  -3   7   0    0.78    0.18
   3  -7   0    0.81    0.17
   7   3   0    0.83    0.17
   7   3   0    0.84    0.16
  -7  -3   0    0.74    0.16
  -7  -3   0    0.87    0.17
   3  -7   0    0.78    0.17
  -2   7   0   12.15    0.53
   2  -7   0   10.98    0.57
   7   2   0   10.60    0.54
  -7  -2   0   11.66    0.55
  -7  -2   0   11.27    0.54
   2  -7   0   11.58    0.55
   7   2   0   11.67    0.56
  -7  -2   0   12.11    0.56
   7   2   0   12.08    0.55
   7   1   0   82.87    3.14
  -7  -1   0   79.74    3.13
  -7  -1   0   83.54    3.05
   1  -7   0   85.39    3.13
  -1   7   0   79.25    3.10
  -1   7   0   84.08    3.13
   1  -7   0   85.51    3.16
   7   1   0   83.49    3.04
  -7  -1   0   85.82    3.14
  -1   7   0   86.36    3.16
   7   1   0   84.51    3.14
  -7   0   0   -0.13    0.12
   0  -7   0   -0.25    0.11
   0   7   0   -0.07    0.11
   7   0   0   -0.14    0.12
   0  -7   0   -0.19    0.11
   0   7   0   -0.27    0.13
   0  -7   0   -0.02    0.09
  -7   0   0   -0.35    0.13
   0   7   0   -0.15    0.09
  -7   0   0   -0.16    0.11
   7   0   0   -0.23    0.12
   7   0   0   -0.07    0.13
  -1  -7   0   81.66    3.10
   1   7   0   82.38    3.10
  -7   1   0   80.53    3.07
   7  -1   0   86.32    3.16
   1   7   0   85.68    3.17
  -1  -7   0   86.15    3.14
   7  -1   0   83.76    3.15
  -7   1   0   83.65    3.15
  -7   1   0   83.06    3.14
   7  -1   0   83.10    3.06
  -1  -7   0   86.85    3.16
   7  -2   0   11.43    0.56
  -7   2   0   11.91    0.56
  -2  -7   0   12.12    0.52
   7  -2   0   11.32    0.57
   7  -2   0   11.68    0.58
  -7   2   0   11.67    0.57
  -2  -7   0   11.65    0.50
  -2  -7   0   11.91    0.55
  -2  -7   0   11.01    0.56
  -7   2   0   12.03    0.59
   2   7   0   11.91    0.57
   2   7   0   11.88    0.55
   7  -3   0    1.22    0.21
   3   7   0    1.04    0.17
  -3  -7   0    1.18    0.18
  -3  -7   0    0.83    0.16
  -7   3   0    1.13    0.19
   3   7   0    0.88    0.15
  -3  -7   0    1.10    0.13
  -7   3   0    1.17    0.19
   7  -3   0    1.17    0.19
   7  -3   0    0.86    0.17
  -3  -7   0    1.00    0.15
   4   7   0    1.32    0.21
  -4  -7   0    1.75    0.23
  -7   4   0    1.78    0.22
   7  -4   0    2.08    0.26
  -7   4   0    1.61    0.22
   7  -4   0    1.63    0.23
   4   7   0    1.35    0.19
  -4  -7   0    1.98    0.21
   7  -4   0    1.66    0.22
  -4  -7   0    1.51    0.21
   7  -5   0   17.22    0.79
   7  -5   0   16.83    0.79
  -7   5   0   16.03    0.77
  -5  -7   0   16.68    0.71
  -7   5   0   16.70    0.76
  -5  -7   0   16.88    0.75
   5   7   0   16.93    0.75
   5   7   0   16.13    0.77
   7  -5   0   16.41    0.76
  -5  -7   0   16.55    0.77
   5   7   0   17.05    0.71
  -6  -7   0    0.63    0.17
  -6  -7   0    0.33    0.17
   7  -6   0    0.61    0.20
   6   7   0    0.56    0.18
   6   7   0    0.33    0.14
   7  -6   0    0.20    0.19
  -7   6   0    0.43    0.18
   7  -6   0    0.47    0.20
  -6  -7   0    0.36    0.15
  -7   6   0    0.38    0.17
   6   7   0    0.41    0.18
   7   7   0    0.03    0.16
  -7  -7   0    0.36    0.16
  -7   7   0    0.37    0.17
   7   7   0    0.14    0.15
   7  -7   0    0.15    0.17
  -7   7   0    0.20    0.16
   7   7   0    0.27    0.14
   7  -7   0    0.13    0.19
   7  -7   0    0.29    0.17
  -7  -7   0    0.37    0.18
  -7  -7   0    0.35    0.16
   8   7   0   26.19    1.13
  -8  -7   0   26.09    1.12
  -7   8   0   25.73    1.16
   7  -8   0   28.27    1.14
   8   7   0   24.97    1.13
  -8  -7   0   26.74    1.14
  -8  -7   0   25.74    1.10
   8   7   0   26.35    1.09
  -7   8   0   26.65    1.13
   7  -8   0   27.35    1.18
   8   6   0    3.20    0.34
   6  -8   0    3.04    0.34
  -8  -6   0    2.95    0.30
  -6   8   0    3.01    0.32
  -8  -6   0    3.43    0.32
  -8  -6   0    2.95    0.31
   6  -8   0    3.29    0.32
   8   6   0    2.92    0.30
   8   6   0    3.07    0.29
  -6   8   0    3.37    0.34
   5  -8   0   19.07    0.82
   8   5   0   18.07    0.83
   8   5   0   17.99    0.79
   8   5   0   17.73    0.81
  -8  -5   0   18.31    0.82
  -5   8   0   17.70    0.81
  -8  -5   0   18.88    0.81
   5  -8   0   17.28    0.84
  -8  -5   0   17.52    0.80
  -5   8   0   18.54    0.85
  -8  -4   0    0.49    0.16
  -8  -4   0    0.27    0.18
   8   4   0    0.29    0.15
  -4   8   0    0.33    0.16
  -4   8   0    0.32    0.18
  -4   8   0    0.41    0.16
   4  -8   0    0.41    0.17
   8   4   0    0.42    0.15
   8   4   0    0.33    0.16
  -8  -4   0    0.54    0.16
   4  -8   0    0.62    0.18
  -3   8   0    1.31    0.22
  -8  -3   0    1.43    0.21
   3  -8   0    1.37    0.21
  -3   8   0    1.49    0.20
  -3   8   0    1.61    0.21
  -8  -3   0    1.60    0.24
   8   3   0    1.28    0.20
   8   3   0    1.93    0.23
   8   3   0    1.66    0.22
   3  -8   0    1.94    0.24
  -8  -3   0    1.77    0.24
  -8  -2   0   24.77    1.02
  -2   8   0   23.65    1.05
  -2   8   0   25.50    1.02
   2  -8   0   24.52    1.05
   8   2   0   23.66    1.02
   8   2   0   23.20    1.02
  -8  -2   0   25.03    1.03
  -2   8   0   24.95    1.00
   8   2   0   24.64    1.01
   2  -8   0   24.88    1.02
  -8  -2   0   24.80    1.02
   8   1   0   27.23    1.09
   1  -8   0   25.62    1.09
  -8  -1   0   25.62    1.08
   8   1   0   26.49    1.07
  -1   8   0   25.62    1.04
  -8  -1   0   25.78    1.07
  -1   8   0   26.89    1.07
   8   1   0   26.37    1.09
   1  -8   0   25.98    1.07
  -1   8   0   25.78    1.10
  -8  -1   0   25.61    1.08
   8   0   0    4.17    0.33
   8   0   0    4.60    0.34
  -8   0   0    4.27    0.36
   8   0   0    4.60    0.35
   0  -8   0    4.31    0.35
   0  -8   0    4.23    0.32
  -8   0   0    4.50    0.34
   0   8   0    4.14    0.36
   0   8   0    4.27    0.28
  -8   0   0    4.25    0.33
   0   8   0    4.73    0.32
   0  -8   0    4.39    0.28
   8  -1   0   26.80    1.09
   1   8   0   26.32    1.03
  -1  -8   0   26.27    1.07
   8  -1   0   26.80    1.09
   8  -1   0   25.27    1.09
   1   8   0   26.04    1.10
  -1  -8   0   25.98    1.09
  -8   1   0   26.35    1.08
  -8   1   0   25.75    1.10
  -8   1   0   26.35    1.08
  -1  -8   0   25.73    1.02
  -8   2   0   24.88    1.03
   2   8   0   24.85    1.05
   8  -2   0   25.11    1.04
  -8   2   0   24.40    1.05
  -2  -8   0   24.98    0.97
  -2  -8   0   24.67    1.04
   2   8   0   24.36    1.02
  -2  -8   0   25.85    0.98
   8  -2   0   23.87    1.05
  -2  -8   0   24.39    1.02
  -8   2   0   24.09    1.03
   8  -3   0    1.31    0.22
   8  -3   0    1.60    0.24
  -3  -8   0    1.35    0.19
   3   8   0    1.47    0.21
  -3  -8   0    1.72    0.19
  -8   3   0    1.64    0.23
   3   8   0    1.72    0.21
   8  -3   0    1.77    0.27
  -3  -8   0    1.41    0.20
  -3  -8   0    1.30    0.20
  -8   3   0    1.45    0.22
  -4  -8   0    0.49    0.14
   8  -4   0    0.29    0.18
  -4  -8   0    0.62    0.13
   8  -4   0    0.43    0.18
  -4  -8   0    0.37    0.17
  -8   4   0    0.34    0.18
   8  -4   0    0.32    0.17
  -8   4   0    0.21    0.17
   4   8   0    0.22    0.14
  -4  -8   0    0.49    0.16
   4   8   0    0.40    0.18
   8  -5   0   17.55    0.84
   8  -5   0   18.29    0.82
  -5  -8   0   18.36    0.82
  -5  -8   0   18.77    0.81
   5   8   0   17.22    0.83
  -5  -8   0   17.82    0.77
  -8   5   0   18.61    0.84
  -8   5   0   17.35    0.81
   8  -5   0   18.44    0.85
   5   8   0   18.13    0.81
  -6  -8   0    3.39    0.31
   8  -6   0    3.29    0.33
   6   8   0    3.37    0.31
  -6  -8   0    3.14    0.33
  -6  -8   0    3.09    0.30
   8  -6   0    3.30    0.38
   6   8   0    2.98    0.35
   6   8   0    3.36    0.28
  -8   6   0    3.22    0.31
   8  -6   0    2.68    0.34
  -8   6   0    3.01    0.33
  -7  -8   0   26.30    1.13
  -7  -8   0   25.55    1.07
   8  -7   0   25.26    1.15
  -8   7   0   25.61    1.14
  -8   7   0   27.12    1.13
   8  -7   0   25.95    1.12
  -7  -8   0   25.94    1.11
   7   8   0   26.23    1.14
   7   8   0   25.87    1.11
   7   8   0   27.08    1.07
   8  -7   0   25.81    1.13
   8   8   0   19.90    0.93
   8  -8   0   20.47    0.94
   8  -8   0   20.89    0.97
  -8  -8   0   21.36    0.91
   8  -8   0   21.23    0.99
  -8  -8   0   20.20    0.93
  -8   8   0   21.19    0.94
   8   8   0   20.29    0.96
  -8   8   0   20.12    0.96
   8   8   0   20.74    0.90
  -8  -8   0   20.55    0.95
  -9  -8   0    8.73    0.58
  -9  -8   0    9.41    0.55
   8  -9   0    9.62    0.57
   9   8   0   10.48    0.55
  -9  -8   0    9.64    0.55
  -8   9   0   10.01    0.60
   8  -9   0    9.90    0.62
  -8   9   0    9.75    0.57
   9   8   0    9.46    0.59
   9   8   0    9.74    0.57
   8  -9   0    9.70    0.61
   7  -9   0    6.95    0.51
   7  -9   0    8.36    0.51
   9   7   0    7.50    0.50
   9   7   0    8.30    0.53
  -9  -7   0    8.10    0.51
   9   7   0    8.13    0.48
  -7   9   0    8.76    0.52
  -7   9   0    8.03    0.53
  -9  -7   0    8.73    0.50
  -9  -7   0    8.22    0.52
  -6   9   0    4.92    0.40
  -6   9   0    4.47    0.41
  -9  -6   0    4.83    0.38
  -9  -6   0    4.56    0.38
   9   6   0    5.00    0.40
   6  -9   0    5.70    0.40
   6  -9   0    4.62    0.41
   9   6   0    4.73    0.36
  -9  -6   0    4.55    0.40
   9   6   0    4.67    0.37
  -9  -5   0    0.03    0.13
   9   5   0    0.02    0.14
  -5   9   0   -0.04    0.16
  -9  -5   0   -0.05    0.15
  -5   9   0   -0.10    0.14
  -5   9   0    0.09    0.16
   5  -9   0   -0.09    0.15
  -9  -5   0   -0.12    0.15
   9   5   0    0.14    0.16
   5  -9   0   -0.12    0.14
   9   5   0   -0.16    0.13
   4  -9   0    2.00    0.25
   9   4   0    1.49    0.23
  -4   9   0    2.09    0.25
  -4   9   0    1.54    0.22
   9   4   0    1.65    0.23
  -4   9   0    1.69    0.26
   4  -9   0    1.95    0.29
  -9  -4   0    1.90    0.26
  -9  -4   0    1.78    0.23
   9   4   0    2.10    0.25
  -9  -4   0    1.98    0.25
   3  -9   0    1.97    0.27
  -3   9   0    1.75    0.22
  -3   9   0    1.89    0.26
  -9  -3   0    2.01    0.26
  -9  -3   0    1.85    0.26
   3  -9   0    1.88    0.25
   9   3   0    1.63    0.22
   9   3   0    1.85    0.26
  -3   9   0    2.47    0.32
  -9  -3   0    1.91    0.27
   9   3   0    1.89    0.27
  -9  -2   0    1.99    0.26
  -2   9   0    2.07    0.27
  -2   9   0    2.18    0.26
  -9  -2   0    2.01    0.26
   9   2   0    1.89    0.27
   9   2   0    2.15    0.27
   2  -9   0    2.12    0.29
   9   2   0    2.06    0.27
   2  -9   0    2.02    0.28
  -9  -2   0    2.51    0.30
  -2   9   0    2.30    0.25
  -9  -1   0    0.21    0.14
   1  -9   0    0.69    0.18
   9   1   0    0.49    0.17
  -1   9   0    0.56    0.16
   9   1   0    0.32    0.14
  -1   9   0    0.55    0.19
  -9  -1   0    0.41    0.17
  -9  -1   0    0.51    0.19
  -1   9   0    0.45    0.14
   1  -9   0    0.47    0.15
   9   1   0    0.23    0.16
   0   9   0   -0.08    0.11
  -9   0   0    0.02    0.14
   0  -9   0    0.00    0.15
   0  -9   0   -0.03    0.14
   9   0   0   -0.15    0.12
   9   0   0    0.08    0.14
  -9   0   0   -0.17    0.14
   0   9   0   -0.05    0.11
   0   9   0    0.02    0.15
   9   0   0   -0.11    0.14
  -9   0   0   -0.17    0.17
   9  -1   0    0.47    0.17
  -1  -9   0    0.48    0.16
  -9   1   0    0.26    0.18
   1   9   0    0.57    0.19
   1   9   0    0.30    0.11
   9  -1   0    0.47    0.19
  -1  -9   0    0.46    0.13
  -9   1   0    0.11    0.15
  -9   1   0    0.39    0.15
  -1  -9   0    0.25    0.16
   9  -1   0    0.32    0.16
  -9   2   0    2.08    0.25
   2   9   0    1.82    0.26
   2   9   0    2.05    0.27
  -9   2   0    1.99    0.28
  -2  -9   0    2.13    0.27
  -2  -9   0    2.22    0.21
  -2  -9   0    2.34    0.27
   9  -2   0    1.71    0.24
  -2  -9   0    2.45    0.25
  -9   2   0    1.75    0.26
   9  -2   0    2.28    0.29
   9  -2   0    2.13    0.29
  -3  -9   0    1.51    0.23
   9  -3   0    1.98    0.25
  -9   3   0    2.02    0.29
   9  -3   0    2.18    0.26
  -3  -9   0    1.75    0.22
   3   9   0    2.14    0.30
   9  -3   0    2.13    0.28
  -9   3   0    1.82    0.23
  -3  -9   0    1.81    0.20
  -3  -9   0    1.58    0.20
   3   9   0    2.02    0.27
   9  -4   0    1.93    0.27
   9  -4   0    1.81    0.25
   4   9   0    2.01    0.27
  -4  -9   0    1.82    0.25
  -4  -9   0    1.55    0.21
   9  -4   0    1.58    0.23
  -9   4   0    1.91    0.25
   4   9   0    1.85    0.23
  -9   4   0    1.41    0.21
  -4  -9   0    1.96    0.25
  -4  -9   0    1.81    0.21
   9  -5   0   -0.04    0.17
  -5  -9   0    0.11    0.12
   9  -5   0    0.10    0.17
   5   9   0   -0.02    0.15
  -9   5   0    0.05    0.14
  -5  -9   0   -0.01    0.12
  -9   5   0    0.05    0.16
  -5  -9   0   -0.02    0.16
   5   9   0   -0.17    0.15
  -5  -9   0    0.15    0.13
   9  -5   0   -0.29    0.14
   9  -6   0    5.11    0.42
  -6  -9   0    5.38    0.36
   9  -6   0    4.22    0.40
   6   9   0    4.95    0.37
   9  -6   0    4.75    0.39
   6   9   0    3.76    0.40
  -9   6   0    4.44    0.38
  -9   6   0    4.44    0.40
  -6  -9   0    4.59    0.40
  -6  -9   0    4.24    0.37
   7   9   0    7.43    0.46
   7   9   0    7.97    0.50
  -7  -9   0    8.01    0.49
   7   9   0    8.22    0.54
  -9   7   0    8.56    0.52
  -7  -9   0    7.98    0.52
   9  -7   0    8.30    0.55
  -9   7   0    7.49    0.51
   9  -7   0    8.16    0.54
   9  -7   0    8.14    0.52
  -7  -9   0    7.77    0.47
   8   9   0    9.60    0.54
   8   9   0    9.25    0.55
  -9   8   0    9.21    0.56
  -8  -9   0    9.18    0.58
   9  -8   0    9.67    0.59
   9  -8   0   10.48    0.63
   8   9   0   10.66    0.61
  -8  -9   0    9.20    0.55
  -9   8   0    9.29    0.58
  -8  -9   0    9.12    0.54
   9  -8   0    9.20    0.56
  -9  -9   0    1.76    0.25
   9  -9   0    2.40    0.34
  -9   9   0    1.94    0.27
   9   9   0    2.52    0.33
   9  -9   0    2.81    0.38
  -9  -9   0    1.95    0.28
   9   9   0    2.04    0.30
  -9   9   0    2.36    0.34
  -9  -9   0    1.88    0.27
   9   9   0    2.72    0.33
   9  -9   0    1.86    0.30
  -9  10   0   -0.14    0.20
  10   9   0    0.32    0.19
 -10  -9   0   -0.15    0.17
   9 -10   0    0.10    0.23
 -10  -9   0    0.17    0.20
  10   9   0   -0.11    0.19
   9 -10   0   -0.10    0.21
 -10  -9   0    0.21    0.22
  10   9   0    0.24    0.21
  -9  10   0   -0.13    0.20
   9 -10   0    0.10    0.20
  10   8   0    0.56    0.23
   8 -10   0    0.72    0.23
   8 -10   0    0.59    0.25
 -10  -8   0    0.62    0.23
 -10  -8   0    0.64    0.23
  10   8   0    0.94    0.22
 -10  -8   0    0.67    0.20
   8 -10   0    0.69    0.25
  10   8   0    0.73    0.21
  -8  10   0    1.02    0.27
  -8  10   0    0.73    0.23
  10   7   0   14.54    0.72
  10   7   0   14.21    0.74
   7 -10   0   15.48    0.79
 -10  -7   0   14.44    0.73
 -10  -7   0   15.01    0.75
 -10  -7   0   14.96    0.76
  -7  10   0   14.30    0.75
   7 -10   0   15.66    0.76
  -7  10   0   15.16    0.78
  -7  10   0   15.32    0.75
  10   7   0   14.88    0.78
  10   6   0    3.50    0.36
  10   6   0    4.56    0.39
  -6  10   0    4.84    0.39
   6 -10   0    3.52    0.39
 -10  -6   0    3.79    0.36
   6 -10   0    3.91    0.38
  10   6   0    3.94    0.36
  -6  10   0    3.20    0.37
  -6  10   0    3.95    0.41
 -10  -6   0    3.39    0.37
 -10  -6   0    4.30    0.39
  -5  10   0    4.63    0.39
  10   5   0    4.81    0.38
  10   5   0    4.10    0.37
  -5  10   0    4.24    0.37
 -10  -5   0    3.70    0.38
 -10  -5   0    3.84    0.35
  -5  10   0    3.99    0.40
 -10  -5   0    4.78    0.39
   5 -10   0    4.78    0.39
   5 -10   0    4.50    0.41
  10   5   0    4.07    0.38
 -10  -4   0    1.84    0.25
  -4  10   0    2.17    0.29
  10   4   0    2.17    0.29
  -4  10   0    1.78    0.26
   4 -10   0    1.90    0.27
 -10  -4   0    2.22    0.29
 -10  -4   0    2.24    0.30
  10   4   0    2.16    0.28
  10   4   0    1.40    0.24
   4 -10   0    1.87    0.30
  -4  10   0    2.30    0.32
   3 -10   0    0.26    0.18
 -10  -3   0    0.79    0.23
  -3  10   0    0.28    0.18
 -10  -3   0    0.41    0.19
 -10  -3   0    0.02    0.18
  10   3   0    0.87    0.20
   3 -10   0    0.08    0.19
  -3  10   0    0.31    0.22
  10   3   0    0.57    0.20
  10   3   0    0.56    0.20
 -10  -2   0   22.18    1.00
  -2  10   0   23.47    0.96
  -2  10   0   22.16    0.99
   2 -10   0   23.00    1.03
  10   2   0   22.80    1.01
 -10  -2   0   22.68    1.00
 -10  -2   0   22.04    0.99
   2 -10   0   23.14    0.99
  -2  10   0   21.92    1.02
  10   2   0   24.05    0.99
  10   2   0   22.63    1.00
  10   1   0   25.40    1.04
 -10  -1   0   23.27    1.04
 -10  -1   0   24.92    1.05
   1 -10   0   24.57    1.04
  -1  10   0   23.40    0.99
  10   1   0   24.13    1.05
  10   1   0   24.32    1.06
  -1  10   0   23.44    1.03
 -10  -1   0   24.33    1.06
  -1  10   0   23.77    1.07
   1 -10   0   24.44    1.08
   0 -10   0   53.60    2.13
  10   0   0   57.06    2.08
  10   0   0   53.76    2.11
 -10   0   0   55.20    2.10
 -10   0   0   51.73    2.10
   0  10   0   51.96    2.13
   0  10   0   53.31    2.10
   0 -10   0   54.90    2.10
  10   0   0   54.42    2.13
 -10   0   0   53.27    2.11
   0  10   0   53.99    2.06
  10  -1   0   24.29    1.05
  10  -1   0   23.72    1.04
 -10   1   0   25.43    1.08
   1  10   0   24.79    1.08
 -10   1   0   25.14    1.05
  -1 -10   0   23.84    1.06
  -1 -10   0   24.33    1.03
   1  10   0   23.85    1.03
   1  10   0   23.36    0.98
 -10   1   0   23.86    1.05
  -1 -10   0   24.16    0.97
  10  -1   0   23.22    1.06
  -2 -10   0   23.94    0.96
  -2 -10   0   23.71    1.01
  -2 -10   0   22.47    0.94
   2  10   0   24.22    1.02
  -2 -10   0   23.97    1.04
  10  -2   0   23.35    1.02
 -10   2   0   23.43    1.02
   2  10   0   23.14    1.04
 -10   2   0   23.44    1.02
  10  -2   0   23.93    1.04
  10  -2   0   22.77    1.03
 -10   2   0   22.84    1.05
  10  -3   0    1.11    0.21
  -3 -10   0    0.65    0.17
 -10   3   0    0.72    0.20
  10  -3   0    0.72    0.20
  10  -3   0    0.95    0.23
   3  10   0    0.60    0.17
   3  10   0    0.66    0.18
  -3 -10   0    0.69    0.20
 -10   3   0    0.95    0.21
  -3 -10   0    0.69    0.15
  -3 -10   0    0.74    0.18
  10  -4   0    2.35    0.33
  -4 -10   0    2.05    0.23
   4  10   0    2.45    0.30
  10  -4   0    2.40    0.29
  -4 -10   0    2.12    0.28
   4  10   0    2.26    0.27
 -10   4   0    2.18    0.27
  -4 -10   0    2.35    0.30
  -4 -10   0    1.96    0.27
  10  -4   0    1.99    0.28
 -10   4   0    1.80    0.25
  -5 -10   0    4.87    0.37
 -10   5   0    4.26    0.39
   5  10   0    4.30    0.40
  -5 -10   0    4.86    0.35
 -10   5   0    4.38    0.39
  -5 -10   0    4.92    0.32
   5  10   0    4.03    0.36
  10  -5   0    4.57    0.41
  10  -5   0    4.78    0.39
  10  -5   0    4.63    0.43
  -5 -10   0    4.53    0.41
  10  -6   0    4.36    0.42
  -6 -10   0    4.26    0.36
 -10   6   0    3.99    0.38
  -6 -10   0    4.20    0.36
  10  -6   0    4.77    0.44
   6  10   0    3.55    0.36
  10  -6   0    2.80    0.37
   6  10   0    3.80    0.36
  -6 -10   0    4.05    0.39
  -6 -10   0    4.89    0.33
 -10   6   0    4.06    0.39
  10  -7   0   15.06    0.80
 -10   7   0   14.52    0.75
  10  -7   0   15.68    0.75
  10  -7   0   14.89    0.78
   7  10   0   13.98    0.76
   7  10   0   15.08    0.74
  -7 -10   0   13.83    0.70
  -7 -10   0   15.30    0.77
 -10   7   0   14.77    0.75
 -10   8   0    0.47    0.21
  10  -8   0    1.07    0.26
   8  10   0    0.81    0.21
  -8 -10   0    0.85    0.22
 -10   8   0    0.85    0.25
   8  10   0    0.86    0.21
  -8 -10   0    1.00    0.25
  10  -8   0    0.86    0.21
  -8 -10   0    0.80    0.22
  10  -8   0    0.63    0.24
   8  10   0    0.78    0.23
 -10   9   0    0.14    0.21
 -10   9   0    0.01    0.20
  -9 -10   0    0.07    0.17
   9  10   0    0.09    0.20
   9  10   0    0.02    0.20
  10  -9   0   -0.08    0.21
  -9 -10   0    0.17    0.19
  10  -9   0    0.33    0.19
  10  -9   0    0.23    0.22
   9  10   0    0.33    0.21
  -9 -10   0    0.01    0.20
  10  10   0    0.60    0.22
 -10  10   0    0.83    0.22
 -10 -10   0    0.34    0.21
  10 -10   0    0.39    0.25
 -10  10   0    0.68    0.24
 -10 -10   0    0.67    0.25
 -10 -10   0    0.57    0.23
  10 -10   0    0.43    0.18
  10  10   0    0.57    0.25
  10  10   0    0.80    0.21
  10 -10   0    0.66    0.30
  10 -11   0    1.25    0.28
  11  10   0    1.01    0.27
 -11 -10   0    1.55    0.32
  11  10   0    1.41    0.30
  11  10   0    1.18    0.26
 -11 -10   0    1.47    0.28
 -10  11   0    1.50    0.30
 -11 -10   0    1.75    0.31
 -10  11   0    1.86    0.31
  10 -11   0    1.43    0.36
  -9  11   0    0.28    0.20
  11   9   0   -0.05    0.20
   9 -11   0   -0.10    0.22
 -11  -9   0    0.40    0.20
  11   9   0    0.51    0.24
 -11  -9   0    0.32    0.24
   9 -11   0    0.08    0.28
 -11  -9   0    0.29    0.23
  11   9   0   -0.07    0.17
  -9  11   0    0.26    0.22
   9 -11   0    0.38    0.20
 -11  -8   0    1.25    0.26
  11   8   0    0.94    0.25
 -11  -8   0    0.97    0.24
  11   8   0    1.24    0.25
  -8  11   0    0.91    0.29
  -8  11   0    0.81    0.27
  -8  11   0    1.03    0.23
   8 -11   0    0.69    0.24
 -11  -8   0    1.05    0.27
   8 -11   0    0.96    0.25
 -11  -7   0   20.27    0.96
   7 -11   0   20.47    1.01
  11   7   0   20.64    0.99
 -11  -7   0   20.20    0.98
  -7  11   0   21.62    0.98
  11   7   0   20.62    0.98
  -7  11   0   20.91    1.01
  11   7   0   21.47    0.95
 -11  -7   0   20.34    0.98
  -7  11   0   20.45    0.99
   7 -11   0   21.41    0.97
 -11  -6   0    1.17    0.26
 -11  -6   0    0.84    0.21
  11   6   0    1.35    0.25
  11   6   0    1.02    0.25
   6 -11   0    1.18    0.26
  -6  11   0    1.19    0.26
  -6  11   0    1.08    0.27
  11   6   0    1.25    0.24
 -11  -6   0    1.14    0.26
  -6  11   0    1.24    0.27
   6 -11   0    1.45    0.26
  11   5   0   17.20    0.85
  11   5   0   17.86    0.83
 -11  -5   0   17.43    0.86
   5 -11   0   17.60    0.85
 -11  -5   0   17.26    0.84
  -5  11   0   18.03    0.85
  -5  11   0   18.39    0.85
  11   5   0   17.54    0.86
 -11  -5   0   18.13    0.86
  -5  11   0   17.67    0.89
   5 -11   0   18.60    0.90
  -4  11   0    0.12    0.21
  11   4   0    0.04    0.20
  -4  11   0   -0.13    0.17
  11   4   0    0.09    0.17
 -11  -4   0   -0.08    0.18
  11   4   0    0.10    0.19
 -11  -4   0   -0.18    0.17
 -11  -4   0    0.19    0.18
  -4  11   0    0.37    0.18
   4 -11   0   -0.04    0.19
   4 -11   0   -0.02    0.21
  -3  11   0   -0.51    0.20
 -11  -3   0    0.19    0.19
   3 -11   0   -0.56    0.21
 -11  -3   0   -0.37    0.18
  11   3   0    0.05    0.17
  -3  11   0    0.17    0.16
  -2  11   0   28.59    1.16
  11   2   0   28.06    1.22
 -11  -2   0   27.44    1.20
  -2  11   0   26.98    1.23
  11   2   0   28.20    1.21
 -11  -2   0   28.89    1.22
  11   2   0   29.30    1.19
  -2  11   0   27.38    1.19
 -11  -2   0   28.40    1.21
   2 -11   0   26.73    1.22
   2 -11   0   27.44    1.20
 -11  -1   0   80.66    3.16
  11   1   0   87.56    3.16
  11   1   0   85.50    3.25
   1 -11   0   83.74    3.25
   1 -11   0   86.15    3.22
  -1  11   0   83.15    3.18
  -1  11   0   83.95    3.22
  11   1   0   83.06    3.23
 -11  -1   0   86.16    3.24
 -11  -1   0   84.97    3.23
  -1  11   0   83.35    3.26
   0  11   0   -0.07    0.15
 -11   0   0   -0.26    0.19
  11   0   0   -0.08    0.20
  11   0   0    0.15    0.18
 -11   0   0   -0.31    0.18
   0 -11   0   -0.30    0.19
 -11   0   0    0.03    0.21
  11   0   0   -0.03    0.21
   0  11   0   -0.15    0.21
   0 -11   0   -0.32    0.18
  11  -1   0   85.16    3.28
  -1 -11   0   85.47    3.29
  -1 -11   0   84.18    3.25
 -11   1   0   85.94    3.22
 -11   1   0   87.91    3.27
  11  -1   0   86.75    3.20
 -11   1   0   87.65    3.27
   1  11   0   84.84    3.25
  11  -1   0   82.64    3.26
  -1 -11   0   83.65    3.19
   1  11   0   84.55    3.29
  11  -2   0   28.33    1.23
   2  11   0   29.08    1.26
  11  -2   0   29.33    1.25
 -11   2   0   29.13    1.23
  11  -2   0   28.17    1.23
  -2 -11   0   28.35    1.16
 -11   2   0   27.96    1.25
  -2 -11   0   29.56    1.25
  -2 -11   0   29.39    1.22
   2  11   0   29.60    1.22
  -2 -11   0   26.71    1.14
 -11   2   0   28.83    1.23
 -11   3   0   -0.11    0.18
  11  -3   0   -0.29    0.18
 -11   3   0   -0.04    0.15
  -3 -11   0   -0.03    0.17
  11  -3   0   -0.08    0.16
  11  -3   0    0.04    0.16
   3  11   0    0.11    0.19
  -3 -11   0   -0.19    0.15
  -3 -11   0   -0.12    0.13
  -3 -11   0    0.11    0.16
   3  11   0    0.04    0.17
 -11   4   0    0.17    0.17
  11  -4   0    0.16    0.19
   4  11   0    0.15    0.18
 -11   4   0    0.14    0.17
   4  11   0    0.09    0.18
  -4 -11   0   -0.03    0.15
  -4 -11   0    0.40    0.16
  11  -4   0    0.34    0.22
  11  -4   0    0.21    0.21
  -4 -11   0    0.26    0.14
  -4 -11   0    0.22    0.19
   5  11   0   17.94    0.88
 -11   5   0   18.01    0.87
  11  -5   0   17.86    0.86
  -5 -11   0   18.05    0.77
 -11   5   0   17.42    0.85
  11  -5   0   18.27    0.90
   5  11   0   18.12    0.85
  11  -5   0   18.25    0.89
  -5 -11   0   17.99    0.80
  -5 -11   0   17.61    0.84
  -5 -11   0   18.42    0.88
  11  -6   0    1.39    0.28
  -6 -11   0    1.17    0.23
  11  -6   0    1.45    0.24
   6  11   0    1.33    0.24
 -11   6   0    1.52    0.26
  -6 -11   0    0.96    0.25
  -6 -11   0    1.30    0.20
 -11   6   0    1.24    0.24
   6  11   0    1.09    0.26
  11  -6   0    1.16    0.27
  -6 -11   0    1.17    0.22
  -7 -11   0   20.77    0.92
 -11   7   0   21.34    1.01
   7  11   0   21.43    0.98
  11  -7   0   20.82    1.02
  -7 -11   0   20.83    0.97
   7  11   0   21.57    1.01
  -7 -11   0   21.07    0.93
  -7 -11   0   21.78    1.01
 -11   7   0   20.52    0.98
  11  -7   0   21.06    0.98
  11  -7   0   19.73    1.01
 -11   8   0    0.91    0.25
  11  -8   0    1.11    0.27
 -11   8   0    1.13    0.26
  11  -8   0    1.15    0.31
  -8 -11   0    1.10    0.25
   8  11   0    1.25    0.25
  -8 -11   0    1.43    0.27
   9  11   0   -0.01    0.19
   9  11   0    0.11    0.20
  11  -9   0    0.14    0.22
  11  -9   0    0.17    0.18
   9  11   0    0.46    0.19
  -9 -11   0    0.33    0.24
  -9 -11   0    0.43    0.24
 -11   9   0    0.37    0.21
  -9 -11   0    0.33    0.22
 -11   9   0    0.24    0.22
 -10 -11   0    1.05    0.29
  10  11   0    1.09    0.27
 -11  10   0    1.31    0.28
  11 -10   0    1.30    0.34
  10  11   0    1.41    0.26
  10  11   0    1.21    0.27
  11 -10   0    1.42    0.27
 -10 -11   0    1.71    0.30
 -10 -11   0    1.69    0.29
 -11  10   0    1.70    0.29
  11 -10   0    1.54    0.34
  11 -11   0   16.09    0.89
 -11  11   0   15.24    0.89
 -11 -11   0   14.91    0.86
  11 -11   0   16.09    0.85
 -11 -11   0   18.12    0.92
 -11  11   0   17.42    0.89
  11  11   0   15.34    0.85
  11  11   0   16.07    0.85
  11 -11   0   15.42    0.92
 -11 -11   0   15.69    0.84
  12  11   0    0.64    0.30
  12  11   0    0.34    0.22
  11 -12   0    0.06    0.32
  11 -12   0   -0.05    0.25
 -12 -11   0    0.60    0.28
 -11  12   0    0.01    0.29
 -12 -11   0    0.52    0.32
 -11  12   0    0.61    0.30
  10 -12   0    4.45    0.44
 -10  12   0    3.82    0.49
  12  10   0    4.04    0.47
  10 -12   0    3.65    0.48
 -12 -10   0    4.05    0.48
 -12 -10   0    4.62    0.46
 -10  12   0    4.56    0.47
 -12 -10   0    4.29    0.46
  10 -12   0    3.52    0.47
  12  10   0    3.78    0.44
 -10  12   0    4.01    0.49
  -9  12   0    4.87    0.52
  12   9   0    4.84    0.50
 -12  -9   0    4.29    0.43
   9 -12   0    4.18    0.46
  12   9   0    4.49    0.48
  -9  12   0    4.48    0.45
   9 -12   0    5.38    0.47
  -9  12   0    3.75    0.44
 -12  -9   0    4.38    0.52
   9 -12   0    4.20    0.57
 -12  -9   0    4.81    0.48
  12   9   0    4.31    0.41
  -8  12   0    0.00    0.21
  12   8   0   -0.41    0.17
 -12  -8   0    0.08    0.25
   8 -12   0   -0.06    0.19
  -8  12   0    0.18    0.24
 -12  -8   0   -0.34    0.21
 -12  -8   0   -0.01    0.18
  12   8   0   -0.05    0.21
  -8  12   0    0.20    0.21
  12   8   0   -0.15    0.21
   8 -12   0    0.03    0.21
  -7  12   0    1.53    0.31
  12   7   0    1.86    0.30
 -12  -7   0    2.16    0.33
   7 -12   0    1.64    0.32
  -7  12   0    1.64    0.27
 -12  -7   0    1.46    0.28
  12   7   0    1.36    0.26
   6 -12   0    6.01    0.47
 -12  -6   0    6.73    0.50
  -6  12   0    6.86    0.51
  12   6   0    6.11    0.50
 -12  -6   0    6.03    0.54
  12   6   0    5.87    0.48
  12   6   0    6.30    0.50
  -6  12   0    6.41    0.51
   6 -12   0    5.99    0.53
 -12  -6   0    6.18    0.46
  -6  12   0    6.47    0.53
  -5  12   0    4.60    0.44
 -12  -5   0    3.93    0.46
 -12  -5   0    3.61    0.39
  12   5   0    4.22    0.43
   5 -12   0    4.51    0.41
   5 -12   0    4.60    0.46
  -5  12   0    4.76    0.41
  -5  12   0    4.83    0.45
  12   5   0    4.39    0.42
 -12  -5   0    4.71    0.43
  12   5   0    4.97    0.44
  12   4   0    4.86    0.44
 -12  -4   0    5.43    0.44
   4 -12   0    5.32    0.48
 -12  -4   0    5.76    0.48
  -4  12   0    5.18    0.47
   4 -12   0    5.41    0.44
  12   4   0    5.01    0.43
  -4  12   0    5.45    0.43
 -12  -4   0    4.65    0.41
  12   4   0    4.88    0.43
  -4  12   0    5.10    0.43
  -3  12   0    0.07    0.21
  12   3   0    0.43    0.21
 -12  -3   0    0.12    0.18
 -12  -3   0    0.38    0.24
  -3  12   0    0.07    0.22
  12   3   0   -0.01    0.17
  12   3   0   -0.14    0.19
  -3  12   0    0.60    0.20
 -12  -3   0   -0.20    0.20
   3 -12   0   -0.11    0.18
   3 -12   0   -0.25    0.23
   2 -12   0   21.67    1.07
  12   2   0   24.46    1.05
 -12  -2   0   23.77    1.08
  -2  12   0   22.57    1.08
  12   2   0   23.14    1.06
  12   2   0   23.45    1.08
 -12  -2   0   22.97    1.04
   2 -12   0   23.56    1.04
 -12  -2   0   22.28    1.05
  -2  12   0   24.05    1.01
  -2  12   0   22.58    1.03
 -12  -1   0   23.66    1.10
  -1  12   0   25.56    1.14
  12   1   0   24.98    1.13
  12   1   0   24.87    1.10
 -12  -1   0   24.49    1.10
  -1  12   0   24.14    1.03
  12   1   0   24.72    1.11
 -12  -1   0   25.12    1.13
  -1  12   0   22.76    1.08
   1 -12   0   23.59    1.09
   1 -12   0   24.99    1.14
 -12   0   0   69.72    2.72
  12   0   0   70.91    2.73
   0  12   0   68.10    2.65
 -12   0   0   72.11    2.73
  12   0   0   67.35    2.74
   0 -12   0   71.67    2.72
   0  12   0   67.81    2.71
   0 -12   0   72.63    2.76
 -12   0   0   68.36    2.70
  12   0   0   71.13    2.68
   0  12   0   68.73    2.75
 -12   1   0   24.89    1.13
  12  -1   0   25.07    1.13
   1  12   0   25.60    1.12
 -12   1   0   24.60    1.12
  12  -1   0   24.33    1.12
  -1 -12   0   24.97    1.11
 -12   1   0   25.43    1.16
  -1 -12   0   25.93    1.16
   1  12   0   26.25    1.17
  12  -1   0   25.67    1.16
   2  12   0   24.49    1.12
  -2 -12   0   24.60    1.03
  12  -2   0   23.76    1.11
 -12   2   0   24.87    1.09
  -2 -12   0   24.67    1.11
 -12   2   0   23.65    1.08
  -2 -12   0   25.33    1.08
 -12   2   0   23.73    1.12
   2  12   0   24.52    1.08
  -2 -12   0   23.41    1.00
  12  -2   0   24.19    1.09
  12  -2   0   23.66    1.10
  -3 -12   0    0.26    0.20
  -3 -12   0    0.36    0.19
   3  12   0    0.18    0.18
   3  12   0    0.31    0.21
  -3 -12   0   -0.01    0.16
  12  -3   0    0.52    0.24
  12  -3   0    0.32    0.22
  -3 -12   0    0.17    0.16
  12  -3   0    0.20    0.20
 -12   3   0    0.17    0.21
 -12   3   0    0.14    0.17
  12  -4   0    5.96    0.50
  -4 -12   0    4.94    0.40
  -4 -12   0    5.29    0.42
  -4 -12   0    5.47    0.36
 -12   4   0    5.80    0.44
  12  -4   0    4.89    0.46
  12  -4   0    5.96    0.45
 -12   4   0    5.83    0.46
   4  12   0    5.55    0.45
  -4 -12   0    5.39    0.46
   4  12   0    4.93    0.47
  -5 -12   0    4.49    0.35
  12  -5   0    4.59    0.42
   5  12   0    5.28    0.42
  -5 -12   0    4.56    0.39
  12  -5   0    4.17    0.45
  -5 -12   0    3.76    0.40
 -12   5   0    4.61    0.45
   5  12   0    5.53    0.47
 -12   5   0    5.45    0.46
  12  -5   0    5.24    0.48
  -5 -12   0    4.96    0.46
 -12   6   0    6.19    0.47
  -6 -12   0    5.70    0.40
   6  12   0    7.12    0.50
  -6 -12   0    6.49    0.48
  -6 -12   0    6.90    0.50
  12  -6   0    6.31    0.49
  -6 -12   0    6.10    0.46
   6  12   0    6.49    0.49
  12  -6   0    5.71    0.51
  12  -6   0    6.01    0.52
 -12   6   0    6.13    0.49
 -12   7   0    1.71    0.29
  -7 -12   0    1.75    0.28
  -7 -12   0    1.90    0.25
  12  -7   0    2.12    0.33
   7  12   0    1.98    0.29
  -7 -12   0    2.18    0.31
 -12   8   0    0.07    0.19
   8  12   0    0.02    0.19
  -8 -12   0    0.06    0.18
   8  12   0    0.27    0.19
  -8 -12   0    0.03    0.19
  12  -8   0   -0.07    0.22
  -8 -12   0    0.09    0.22
  12  -8   0    0.21    0.23
  -8 -12   0   -0.04    0.21
  12  -8   0    0.21    0.19
 -12   8   0    0.12    0.20
  -9 -12   0    4.55    0.47
  -9 -12   0    4.99    0.48
   9  12   0    4.25    0.45
  12  -9   0    5.10    0.52
  -9 -12   0    4.61    0.40
   9  12   0    4.73    0.45
  12  -9   0    4.36    0.49
 -12   9   0    4.05    0.46
 -12   9   0    3.90    0.47
  12  -9   0    4.05    0.44
  10  12   0    3.66    0.48
  12 -10   0    3.51    0.47
  10  12   0    4.76    0.49
 -12  10   0    3.61    0.44
 -10 -12   0    4.20    0.50
  12 -10   0    4.48    0.58
 -12  10   0    4.28    0.49
  12 -10   0    3.88    0.43
 -10 -12   0    3.25    0.41
 -11 -12   0    0.41    0.30
  12 -11   0    0.19    0.35
  11  12   0    0.29    0.24
  12 -11   0    0.61    0.29
  11  12   0    0.48    0.29
 -11 -12   0    0.94    0.29
 -12  11   0    0.29    0.28
 -12 -12   0    4.67    0.58
 -12 -12   0    5.15    0.57
  12  12   0    5.15    0.54
  12  12   0    4.30    0.50
 -12  12   0    5.55    0.58
  13  12   0    0.68    0.33
 -12  13   0   -0.15    0.32
  13  12   0    0.11    0.24
 -13 -12   0   -0.21    0.34
 -13 -12   0    0.29    0.27
  12 -13   0    0.20    0.30
 -13 -12   0    0.34    0.27
 -12  13   0   -0.09    0.28
  12 -13   0    0.10    0.29
  13  12   0   -0.07    0.32
 -12  13   0   -0.12    0.31
  13  11   0    0.12    0.25
 -13 -11   0    0.29    0.31
  11 -13   0    0.09    0.29
  11 -13   0    0.69    0.43
 -11  13   0    0.13    0.33
 -13 -11   0    0.26    0.27
 -11  13   0    0.94    0.29
  10 -13   0    6.52    0.59
 -13 -10   0    7.54    0.55
  13  10   0    6.29    0.60
  13  10   0    6.19    0.53
  10 -13   0    6.67    0.69
 -13 -10   0    6.87    0.65
 -10  13   0    7.15    0.64
 -13 -10   0    5.86    0.54
 -10  13   0    6.83    0.57
   9 -13   0    0.19    0.26
  -9  13   0   -0.10    0.30
 -13  -9   0   -0.19    0.20
   9 -13   0   -0.20    0.32
 -13  -9   0    0.05    0.30
  13   9   0    0.07    0.27
  -9  13   0    0.54    0.25
   9 -13   0    0.11    0.24
  -9  13   0    0.07    0.27
 -13  -9   0   -0.05    0.23
 -13  -8   0    0.11    0.21
 -13  -8   0    0.32    0.27
  -8  13   0    0.21    0.23
  -8  13   0    0.71    0.29
  13   8   0    0.71    0.26
  -8  13   0    0.34    0.23
   8 -13   0    0.30    0.25
   8 -13   0    0.17    0.24
  13   8   0    0.38    0.25
 -13  -8   0    0.02    0.24
  13   8   0    0.02    0.20
   7 -13   0    0.10    0.22
 -13  -7   0    0.02    0.22
  13   7   0    0.15    0.23
  13   7   0    0.25    0.23
  -7  13   0   -0.03    0.23
  -7  13   0    0.12    0.25
 -13  -7   0    0.27    0.19
 -13  -7   0    0.14    0.26
  13   7   0    0.18    0.18
   7 -13   0    0.34    0.21
  -7  13   0    0.28    0.23
 -13  -6   0   -0.30    0.17
   6 -13   0    0.18    0.19
  -6  13   0   -0.28    0.22
 -13  -6   0   -0.23    0.23
  13   6   0    0.16    0.24
 -13  -6   0    0.07    0.22
  13   6   0    0.00    0.19
  -6  13   0    0.14    0.19
  -6  13   0    0.04    0.23
  13   6   0    0.05    0.19
   6 -13   0    0.04    0.20
   5 -13   0    6.28    0.53
 -13  -5   0    6.04    0.49
  13   5   0    6.40    0.51
  -5  13   0    5.97    0.50
  -5  13   0    7.10    0.49
  13   5   0    5.43    0.53
  13   5   0    6.63    0.49
 -13  -5   0    6.43    0.55
   4 -13   0   13.50    0.77
  13   4   0   13.15    0.74
  13   4   0   14.17    0.74
 -13  -4   0   13.53    0.74
  -4  13   0   12.80    0.71
   4 -13   0   14.39    0.74
 -13  -4   0   13.19    0.77
 -13  -4   0   12.18    0.70
  -4  13   0   14.32    0.73
  -4  13   0   13.63    0.77
  13   3   0    0.48    0.22
  13   3   0    0.28    0.19
 -13  -3   0    0.53    0.25
   3 -13   0    0.12    0.22
 -13  -3   0    0.16    0.18
 -13  -3   0    0.42    0.23
   3 -13   0    0.24    0.19
  -3  13   0    0.54    0.25
  -3  13   0    0.25    0.19
  13   3   0    0.30    0.21
  -3  13   0    0.47    0.21
   2 -13   0    2.24    0.34
 -13  -2   0    2.19    0.32
  -2  13   0    2.12    0.31
  13   2   0    2.69    0.36
  13   2   0    2.66    0.34
  -2  13   0    1.49    0.24
   2 -13   0    2.24    0.31
 -13  -2   0    1.92    0.28
 -13  -2   0    2.56    0.37
  13   2   0    2.09    0.31
  -2  13   0    2.42    0.34
  13   1   0    9.31    0.57
  -1  13   0    8.44    0.52
   1 -13   0    9.41    0.60
  -1  13   0    9.19    0.54
 -13  -1   0    9.00    0.58
 -13  -1   0    8.31    0.60
  13   1   0    8.70    0.57
   1 -13   0    8.43    0.54
 -13  -1   0    8.95    0.56
  -1  13   0    8.91    0.59
  13   1   0    9.38    0.58
  13   0   0    0.08    0.20
   0  13   0   -0.05    0.19
  13   0   0    0.04    0.18
   0 -13   0   -0.29    0.15
 -13   0   0    0.19    0.18
 -13   0   0   -0.21    0.19
   0  13   0    0.03    0.15
  13   0   0    0.08    0.21
 -13   0   0   -0.43    0.20
   0 -13   0   -0.40    0.16
  13  -1   0    9.14    0.60
   1  13   0    9.18    0.56
  -1 -13   0    8.74    0.58
 -13   1   0    8.77    0.63
  13  -1   0    9.74    0.59
   1  13   0    9.01    0.60
  -1 -13   0    8.94    0.56
 -13   1   0    8.53    0.57
 -13   1   0    9.51    0.58
  13  -1   0    8.93    0.57
  13  -2   0    2.10    0.31
  -2 -13   0    1.82    0.29
 -13   2   0    1.73    0.28
  13  -2   0    2.28    0.32
  -2 -13   0    2.33    0.34
   2  13   0    2.53    0.36
  13  -2   0    1.82    0.28
   2  13   0    2.14    0.33
  -2 -13   0    2.74    0.35
  13  -3   0   -0.11    0.18
   3  13   0    0.00    0.21
  -3 -13   0    0.22    0.23
  -3 -13   0    0.40    0.21
  -3 -13   0   -0.06    0.18
  13  -3   0   -0.03    0.20
  13  -3   0    0.26    0.22
   3  13   0    0.09    0.21
 -13   3   0    0.42    0.23
 -13   3   0   -0.02    0.19
  -3 -13   0    0.14    0.16
  13  -4   0   12.91    0.74
   4  13   0   13.71    0.72
  -4 -13   0   12.86    0.73
 -13   4   0   13.00    0.70
  -4 -13   0   12.67    0.70
 -13   4   0   12.80    0.72
  -4 -13   0   12.85    0.67
  -4 -13   0   12.31    0.61
  13  -5   0    6.46    0.56
  13  -5   0    6.19    0.51
   5  13   0    7.67    0.50
 -13   5   0    6.26    0.49
  -5 -13   0    6.43    0.53
  -5 -13   0    6.14    0.46
  -5 -13   0    6.22    0.41
 -13   6   0    0.45    0.21
  13  -6   0   -0.14    0.18
  -6 -13   0    0.02    0.20
  13  -6   0    0.08    0.24
   6  13   0    0.17    0.19
  -6 -13   0   -0.21    0.17
 -13   6   0    0.07    0.20
   6  13   0    0.38    0.20
  -6 -13   0    0.07    0.20
  -6 -13   0    0.14    0.18
  13  -6   0   -0.08    0.20
 -13   7   0    0.34    0.22
  13  -7   0   -0.19    0.23
  -7 -13   0   -0.02    0.21
   7  13   0    0.03    0.20
  13  -7   0    0.24    0.22
  -7 -13   0    0.10    0.22
   7  13   0    0.13    0.21
  13  -7   0    0.06    0.22
 -13   7   0   -0.10    0.22
  -7 -13   0    0.49    0.19
  -7 -13   0    0.28    0.19
  -8 -13   0    0.25    0.25
 -13   8   0    0.24    0.24
   8  13   0   -0.07    0.21
  -8 -13   0    0.52    0.22
 -13   8   0    0.04    0.24
  -8 -13   0    0.31    0.25
  -8 -13   0    0.27    0.19
  13  -8   0   -0.25    0.25
  13  -8   0    0.16    0.23
   8  13   0    0.34    0.24
  13  -8   0    0.13    0.24
  -9 -13   0    0.36    0.23
  -9 -13   0   -0.21    0.22
  -9 -13   0    0.26    0.24
 -13   9   0    0.17    0.23
 -13   9   0   -0.44    0.23
  13  -9   0   -0.11    0.26
  13  -9   0    0.36    0.29
  -9 -13   0    0.14    0.21
  13 -10   0    6.57    0.63
  10  13   0    6.75    0.55
 -10 -13   0    7.78    0.61
 -13  10   0    6.46    0.57
 -10 -13   0    7.00    0.57
 -10 -13   0    6.79    0.56
  13 -10   0    5.63    0.63
 -11 -13   0    0.48    0.29
 -13  11   0    0.51    0.26
  11  13   0    0.51    0.24
 -11 -13   0    0.32    0.31
  13 -11   0    1.20    0.34
  13 -12   0    0.65    0.31
 -12 -13   0   -0.23    0.33
  12  13   0    0.13    0.24
  12  13   0    0.45    0.30
 -13  12   0   -0.10    0.26
 -12 -13   0    0.98    0.30
  13 -12   0    0.68    0.27
 -13  12   0    0.56    0.30
 -13 -13   0    0.83    0.36
  13 -13   0    0.89    0.31
  13  13   0    0.78    0.40
 -13  13   0    0.53    0.37
  13  13   0    0.46    0.28
 -13 -13   0    0.70    0.33
  13  13   0    0.13    0.36
  13 -13   0    0.16    0.32
 -13  13   0    1.44    0.32
 -13  13   0    0.67    0.39
 -13 -13   0    1.04    0.33
  13 -13   0    0.42    0.41
 -13  14   0    0.45    0.32
 -13  14   0   -0.03    0.38
  13 -14   0   -0.39    0.44
  14  13   0    0.40    0.41
 -14 -13   0   -0.21    0.32
  13 -14   0   -0.17    0.34
 -14 -13   0    0.09    0.43
 -14 -13   0   -0.03    0.33
  14  13   0    0.63    0.32
 -13  14   0   -0.43    0.35
  13 -14   0    0.60    0.33
  14  13   0   -0.16    0.28
 -12  14   0   -0.19    0.29
  14  12   0    0.17    0.28
 -14 -12   0   -0.09    0.31
 -12  14   0   -0.76    0.34
 -14 -12   0   -0.15    0.36
 -14 -12   0   -0.59    0.28
  14  12   0    0.20    0.32
 -12  14   0    0.24    0.37
  14  12   0   -0.34    0.34
  12 -14   0    0.08    0.42
  12 -14   0    0.61    0.32
 -14 -11   0    0.75    0.32
  11 -14   0   -0.22    0.27
 -11  14   0    0.89    0.32
 -14 -11   0    0.15    0.28
 -14 -11   0    0.76    0.38
  14  11   0    0.03    0.24
  14  11   0    0.03    0.30
 -11  14   0    0.39    0.32
  11 -14   0    0.05    0.31
  14  11   0    0.30    0.33
 -10  14   0    0.13    0.31
 -14 -10   0   -0.19    0.25
  10 -14   0    0.36    0.39
  14  10   0    0.09    0.30
 -10  14   0   -0.26    0.26
 -14 -10   0    0.11    0.31
  14  10   0   -0.53    0.25
  10 -14   0    0.01    0.29
  -9  14   0    6.42    0.63
   9 -14   0    4.53    0.59
  14   9   0    5.11    0.55
  14   9   0    5.51    0.52
 -14  -9   0    5.08    0.59
 -14  -9   0    5.04    0.58
  -9  14   0    5.90    0.56
   9 -14   0    5.47    0.66
   8 -14   0    0.36    0.24
  -8  14   0    0.25    0.32
 -14  -8   0    0.43    0.24
  -8  14   0    0.12    0.28
 -14  -8   0    0.05    0.29
  14   8   0    0.25    0.29
 -14  -7   0    3.83    0.42
  14   7   0    2.30    0.34
  -7  14   0    3.28    0.44
  -7  14   0    3.79    0.43
   7 -14   0    3.75    0.43
  -7  14   0    2.80    0.38
 -14  -7   0    3.11    0.44
 -14  -7   0    3.44    0.46
   7 -14   0    4.12    0.51
  -6  14   0    1.90    0.34
  14   6   0    1.74    0.32
 -14  -6   0    1.19    0.26
 -14  -6   0    1.62    0.29
  14   6   0    1.52    0.29
  -6  14   0    1.54    0.33
 -14  -6   0    1.71    0.36
   6 -14   0    1.46    0.29
   6 -14   0    1.38    0.33
  -6  14   0    2.15    0.32
   5 -14   0    0.06    0.23
 -14  -5   0   -0.12    0.22
 -14  -5   0   -0.10    0.26
  14   5   0    0.07    0.24
  -5  14   0    0.02    0.25
  14   5   0    0.03    0.20
 -14  -5   0   -0.33    0.18
  -5  14   0   -0.17    0.24
  -5  14   0   -0.16    0.21
   5 -14   0    0.30    0.21
  14   5   0    0.06    0.21
   4 -14   0    0.23    0.24
  -4  14   0    0.20    0.20
   4 -14   0    0.21    0.20
  14   4   0   -0.07    0.22
  -4  14   0    0.03    0.21
  -4  14   0   -0.32    0.22
 -14  -4   0   -0.01    0.27
 -14  -4   0   -0.14    0.20
 -14  -4   0   -0.30    0.20
  14   4   0    0.10    0.19
  14   4   0   -0.12    0.21
 -14  -3   0    0.26    0.19
 -14  -3   0    0.57    0.25
  -3  14   0    0.45    0.21
  -3  14   0    0.64    0.21
  14   3   0    0.66    0.23
   3 -14   0   -0.09    0.21
  14   3   0    0.33    0.23
 -14  -3   0    0.58    0.29
  -3  14   0    0.92    0.29
  14   3   0    0.43    0.22
   3 -14   0    0.82    0.24
   2 -14   0    0.87    0.28
  14   2   0    0.62    0.23
  14   2   0    0.94    0.25
  14   2   0    1.07    0.27
 -14  -2   0    0.99    0.31
  -2  14   0    0.58    0.19
 -14  -2   0    0.51    0.23
  -2  14   0    0.69    0.28
 -14  -2   0    0.96    0.26
   2 -14   0    1.02    0.24
  -2  14   0    0.94    0.24
  14   1   0    8.04    0.56
  14   1   0    6.38    0.52
  -1  14   0    7.37    0.50
   1 -14   0    8.55    0.57
   1 -14   0    7.22    0.54
  -1  14   0    7.70    0.59
  -1  14   0    7.45    0.50
  14   1   0    7.14    0.54
 -14  -1   0    7.81    0.63
 -14  -1   0    7.65    0.54
 -14   0   0    0.29    0.28
  14   0   0    0.51    0.24
   0  14   0    1.07    0.28
   0  14   0    0.57    0.20
 -14   0   0    0.59    0.23
   0  14   0    0.68    0.22
  14   0   0    0.99    0.27
   0 -14   0    0.77    0.26
   1  14   0    7.83    0.59
  14  -1   0    7.45    0.55
   1  14   0    8.02    0.53
 -14   1   0    7.84    0.60
 -14   1   0    7.84    0.56
  -1 -14   0    8.00    0.57
  14  -1   0    8.15    0.57
 -14   2   0    1.09    0.26
  14  -2   0    0.67    0.26
  -2 -14   0    0.63    0.20
  14  -2   0    0.74    0.26
  -2 -14   0    0.93    0.26
   2  14   0    1.15    0.24
 -14   2   0    0.85    0.24
  -2 -14   0    0.81    0.23
  14  -2   0    0.54    0.24
   2  14   0    0.74    0.25
  14  -3   0    0.59    0.23
 -14   3   0    1.13    0.26
  -3 -14   0    0.72    0.20
  14  -3   0    0.77    0.23
   3  14   0    0.16    0.21
  14  -3   0    0.56    0.24
   3  14   0    0.64    0.22
  -3 -14   0    1.10    0.27
  -3 -14   0    0.45    0.22
  -3 -14   0    0.60    0.24
 -14   3   0    0.90    0.27
  14  -4   0    0.49    0.21
 -14   4   0   -0.08    0.19
 -14   4   0    0.21    0.21
  -4 -14   0    0.09    0.22
   4  14   0    0.06    0.20
  -4 -14   0    0.10    0.18
   4  14   0    0.17    0.23
  14  -4   0    0.26    0.23
  -4 -14   0   -0.21    0.21
  14  -4   0    0.11    0.23
  -4 -14   0   -0.13    0.17
   5  14   0   -0.14    0.20
  -5 -14   0   -0.19    0.17
 -14   5   0    0.42    0.23
   5  14   0    0.18    0.20
  14  -5   0   -0.09    0.19
  -5 -14   0   -0.05    0.24
 -14   5   0   -0.06    0.21
  -5 -14   0    0.14    0.18
  14  -5   0    0.42    0.33
  -5 -14   0   -0.11    0.20
  14  -5   0   -0.02    0.22
  -6 -14   0    1.88    0.29
 -14   6   0    1.56    0.31
  -6 -14   0    1.47    0.27
  -6 -14   0    1.85    0.25
   6  14   0    1.69    0.30
  -6 -14   0    1.56    0.33
  14  -6   0    1.27    0.27
  14  -6   0    1.12    0.28
 -14   6   0    1.82    0.33
   6  14   0    1.70    0.29
 -14   7   0    4.42    0.47
   7  14   0    3.20    0.42
   7  14   0    3.54    0.46
  -7 -14   0    3.41    0.38
 -14   7   0    3.29    0.44
  -7 -14   0    3.82    0.46
  -7 -14   0    2.84    0.38
  14  -7   0    2.34    0.40
  -7 -14   0    3.32    0.42
  14  -8   0    0.36    0.29
 -14   8   0    0.15    0.26
  -8 -14   0    0.35    0.28
  -8 -14   0    0.23    0.22
  -8 -14   0    0.36    0.22
   9  14   0    6.19    0.54
  -9 -14   0    5.35    0.50
  -9 -14   0    5.60    0.55
 -14   9   0    4.45    0.51
  -9 -14   0    5.31    0.55
  14  -9   0    4.72    0.58
 -10 -14   0    0.00    0.26
 -10 -14   0    0.48    0.28
  10  14   0    0.09    0.25
 -10 -14   0    0.28    0.31
 -14  10   0    0.27    0.27
  14 -10   0   -0.50    0.26
 -14  11   0   -0.38    0.29
 -11 -14   0    0.28    0.27
 -14  11   0    0.46    0.28
  11  14   0    0.55    0.28
 -11 -14   0    0.77    0.32
 -11 -14   0    0.77    0.33
  14 -11   0    0.06    0.27
  11  14   0    0.30    0.30
  14 -11   0    0.81    0.32
 -11 -14   0    0.03    0.33
  14 -11   0    1.31    0.44
 -12 -14   0    0.02    0.29
 -12 -14   0    0.41    0.32
  14 -12   0    0.20    0.32
  12  14   0   -0.60    0.34
 -12 -14   0   -0.14    0.35
  14 -12   0   -0.01    0.40
  12  14   0   -0.21    0.27
 -14  12   0    0.63    0.28
  14 -12   0   -0.28    0.28
 -14  12   0   -0.10    0.35
 -13 -14   0    0.02    0.32
 -14  13   0    0.00    0.40
 -14  13   0    0.04    0.31
  14 -13   0   -0.45    0.32
  14 -13   0   -0.52    0.43
  13  14   0    0.52    0.31
 -13 -14   0    0.04    0.38
  13  14   0    0.50    0.34
 -13 -14   0   -0.10    0.32
 -14  13   0   -0.72    0.37
  14 -13   0   -0.07    0.32
  14 -14   0   -0.10    0.33
 -14  14   0   -0.39    0.40
  14  14   0   -0.55    0.38
  14 -14   0    0.02    0.37
 -14 -14   0    0.05    0.34
 -14  14   0    0.29    0.32
  14 -14   0   -0.48    0.52
 -14  14   0   -0.17    0.43
  15  14   0   -0.07    0.34
 -15 -14   0   -0.73    0.36
  15  14   0   -0.31    0.46
 -14  15   0    0.15    0.38
 -14  15   0   -0.50    0.45
  14 -15   0    0.45    0.53
 -14  15   0    0.01    0.51
 -15 -14   0    0.89    0.51
  14 -15   0   -0.13    0.37
  15  14   0    0.25    0.49
  14 -15   0    0.91    0.40
 -13  15   0   -0.68    0.41
 -13  15   0   -0.37    0.44
  13 -15   0   -0.32    0.33
  13 -15   0   -0.09    0.57
 -13  15   0    0.64    0.36
  15  13   0    0.34    0.43
 -15 -13   0   -0.29    0.42
  15  13   0   -0.66    0.32
 -15 -13   0   -0.12    0.35
  15  13   0   -0.15    0.38
 -15 -13   0   -0.63    0.35
  13 -15   0    0.14    0.42
  12 -15   0    1.81    0.39
 -12  15   0    1.69    0.47
 -12  15   0    1.19    0.34
  15  12   0    0.72    0.32
 -15 -12   0    1.25    0.37
  15  12   0    0.97    0.43
 -12  15   0    1.57    0.44
  12 -15   0    1.30    0.40
  12 -15   0    1.23    0.57
  15  12   0    1.47    0.41
 -15 -12   0    0.18    0.36
 -15 -11   0   -0.10    0.31
  11 -15   0    0.67    0.36
  11 -15   0    0.02    0.31
 -11  15   0   -0.31    0.35
 -15 -11   0    0.18    0.31
  11 -15   0    0.01    0.47
 -11  15   0    0.33    0.37
 -11  15   0    0.37    0.32
  15  11   0    0.01    0.34
 -15 -11   0    0.33    0.43
  15  11   0   -0.48    0.33
  15  11   0   -0.21    0.28
 -10  15   0    0.33    0.38
  10 -15   0    0.36    0.31
  15  10   0    0.24    0.33
 -15 -10   0   -0.45    0.29
 -15 -10   0    0.08    0.34
  15  10   0    0.27    0.32
  10 -15   0    0.61    0.29
 -15 -10   0   -0.13    0.27
 -10  15   0   -0.42    0.30
 -10  15   0    0.27    0.28
  15   9   0   -0.21    0.27
  -9  15   0   -0.41    0.25
   9 -15   0    0.19    0.23
  -9  15   0    0.06    0.35
  15   9   0   -0.33    0.27
 -15  -9   0   -0.30    0.34
 -15  -9   0    0.02    0.30
  15   9   0   -0.05    0.30
   9 -15   0   -0.38    0.29
   9 -15   0    0.10    0.44
 -15  -8   0    4.32    0.51
  15   8   0    4.07    0.53
  -8  15   0    5.11    0.63
  -8  15   0    4.46    0.54
 -15  -8   0    5.21    0.55
  15   8   0    3.52    0.44
   8 -15   0    5.82    0.60
   7 -15   0   -0.42    0.30
 -15  -7   0    0.24    0.33
  -7  15   0   -0.27    0.29
 -15  -7   0   -0.56    0.23
  15   7   0   -0.52    0.22
  -7  15   0   -0.18    0.23
  15   7   0   -0.21    0.27
  -6  15   0    2.16    0.37
  -6  15   0    1.67    0.34
  15   6   0    1.59    0.35
 -15  -6   0    1.23    0.39
 -15  -6   0    0.93    0.27
   6 -15   0    1.82    0.33
  15   5   0    0.24    0.28
   5 -15   0    1.12    0.25
  -5  15   0    0.56    0.28
 -15  -5   0    0.64    0.27
 -15  -5   0    0.38    0.23
   5 -15   0    0.85    0.29
  -5  15   0    0.55    0.28
 -15  -5   0    0.92    0.35
  -5  15   0    0.74    0.31
 -15  -4   0    1.01    0.27
  -4  15   0    1.71    0.33
   4 -15   0    1.30    0.31
 -15  -4   0    1.00    0.35
  15   4   0    1.30    0.31
  -4  15   0    1.40    0.27
  15   4   0    1.12    0.30
 -15  -4   0    1.49    0.32
  -4  15   0    1.61    0.34
   4 -15   0    1.51    0.30
   3 -15   0    0.80    0.22
 -15  -3   0    0.39    0.25
 -15  -3   0    0.03    0.21
  -3  15   0    0.17    0.18
  -3  15   0    0.23    0.25
 -15  -3   0   -0.29    0.28
  -3  15   0    0.61    0.26
  15   3   0    0.20    0.23
  15   3   0   -0.03    0.23
   3 -15   0    0.31    0.26
  -2  15   0    3.47    0.47
   2 -15   0    4.44    0.40
  15   2   0    4.94    0.47
  15   2   0    3.71    0.49
 -15  -2   0    4.65    0.45
  15   2   0    4.59    0.43
  -2  15   0    3.79    0.40
   2 -15   0    3.32    0.47
  -2  15   0    4.47    0.45
 -15  -2   0    3.83    0.46
 -15  -2   0    4.55    0.54
  -1  15   0    1.95    0.33
  -1  15   0    2.32    0.30
   1 -15   0    3.15    0.43
 -15  -1   0    2.52    0.35
  15   1   0    2.54    0.36
  -1  15   0    2.67    0.34
  15   1   0    1.77    0.29
 -15  -1   0    2.48    0.35
   1 -15   0    1.85    0.29
 -15  -1   0    1.92    0.36
  15   1   0    2.44    0.34
  15   0   0   -0.44    0.20
   0 -15   0    0.18    0.21
 -15   0   0   -0.29    0.21
   0  15   0    0.04    0.21
 -15   0   0    0.25    0.21
  15   0   0   -0.05    0.20
   0  15   0    0.23    0.24
 -15   0   0    0.25    0.27
   0 -15   0    0.44    0.26
  15   0   0   -0.07    0.22
  -1 -15   0    2.76    0.38
 -15   1   0    2.54    0.36
  -1 -15   0    2.39    0.35
 -15   1   0    2.84    0.38
 -15   1   0    2.63    0.40
   1  15   0    2.15    0.33
  15  -1   0    2.40    0.33
  15  -1   0    2.10    0.31
  -1 -15   0    2.42    0.32
  15  -1   0    3.04    0.40
   1  15   0    1.91    0.30
 -15   2   0    4.03    0.46
  15  -2   0    3.19    0.45
   2  15   0    3.78    0.48
   2  15   0    4.79    0.42
  15  -2   0    4.33    0.46
 -15   2   0    4.72    0.46
  -2 -15   0    4.48    0.46
  15  -2   0    3.97    0.45
  -2 -15   0    3.90    0.49
  -2 -15   0    3.88    0.42
  15  -3   0    0.27    0.25
  15  -3   0    0.16    0.23
  -3 -15   0    0.19    0.23
   3  15   0    0.37    0.26
 -15   3   0    0.02    0.22
  -3 -15   0    0.43    0.27
   3  15   0    0.35    0.23
  -3 -15   0    0.03    0.20
  15  -3   0   -0.06    0.21
 -15   3   0    0.32    0.23
   4  15   0    1.27    0.32
 -15   4   0    1.38    0.28
  -4 -15   0    1.04    0.27
   4  15   0    1.49    0.28
  -4 -15   0    1.45    0.22
  15  -4   0    1.17    0.33
 -15   4   0    0.90    0.27
  -4 -15   0    1.76    0.34
  -4 -15   0    1.46    0.26
  15  -5   0    0.45    0.30
 -15   5   0    0.52    0.25
  -5 -15   0    0.87    0.22
  -5 -15   0    0.61    0.24
   5  15   0    0.68    0.26
  -5 -15   0    0.91    0.26
 -15   5   0    0.85    0.27
   5  15   0    0.89    0.28
  -5 -15   0    0.73    0.30
  -6 -15   0    1.86    0.32
 -15   6   0    1.47    0.30
  -6 -15   0    1.20    0.25
  -6 -15   0    1.08    0.29
  15  -7   0   -0.62    0.25
  -7 -15   0   -0.11    0.21
  -7 -15   0    0.05    0.26
 -15   7   0   -0.37    0.23
   7  15   0   -0.50    0.22
  -7 -15   0   -0.25    0.25
  15  -8   0    4.36    0.55
  -8 -15   0    4.67    0.45
  -8 -15   0    4.86    0.56
 -15   8   0    5.52    0.55
   8  15   0    3.95    0.48
  -8 -15   0    5.02    0.57
  -9 -15   0    0.20    0.30
  15  -9   0    0.33    0.27
  -9 -15   0    0.04    0.25
  15  -9   0   -0.21    0.24
 -15   9   0   -0.30    0.26
  -9 -15   0   -0.51    0.33
   9  15   0    0.18    0.25
  15  -9   0    0.47    0.29
   9  15   0    0.31    0.28
 -10 -15   0    0.10    0.28
 -10 -15   0    0.62    0.31
 -10 -15   0   -0.06    0.25
  10  15   0    0.29    0.27
 -15  10   0   -0.11    0.30
  15 -10   0    0.04    0.36
  15 -10   0    0.13    0.30
 -10 -15   0    0.21    0.35
  15 -10   0    0.24    0.30
 -15  10   0   -0.35    0.25
  10  15   0    0.28    0.31
 -11 -15   0    0.32    0.29
  11  15   0    0.18    0.28
  11  15   0    0.21    0.34
  15 -11   0    0.72    0.32
 -11 -15   0    0.16    0.32
 -11 -15   0   -0.07    0.39
 -15  11   0    0.34    0.29
 -11 -15   0    0.86    0.32
  15 -11   0    0.26    0.32
 -15  11   0   -0.24    0.36
  15 -11   0    0.03    0.38
  12  15   0    0.51    0.31
  15 -12   0    1.34    0.37
 -12 -15   0    1.33    0.36
 -12 -15   0    0.87    0.41
  12  15   0    1.54    0.38
 -12 -15   0    0.79    0.36
  15 -12   0    1.79    0.41
 -15  12   0    1.76    0.37
 -15  12   0    1.68    0.45
  15 -12   0    0.35    0.45
 -12 -15   0    1.60    0.43
  15 -13   0    0.24    0.33
  13  15   0    0.02    0.29
 -13 -15   0    0.33    0.36
 -15  13   0    0.44    0.37
  13  15   0   -0.42    0.39
 -13 -15   0   -0.06    0.42
 -13 -15   0    0.22    0.40
  15 -13   0   -0.21    0.43
  15 -13   0    0.45    0.36
 -13 -15   0    0.41    0.36
 -15  13   0   -0.48    0.40
 -15  13   0   -0.22    0.41
 -15  14   0    0.58    0.53
  15 -14   0    0.52    0.54
 -14 -15   0    1.33    0.40
 -15  14   0    0.53    0.37
 -14 -15   0    0.28    0.50
 -14 -15   0   -0.22    0.40
  14  15   0   -0.93    0.45
  15 -14   0   -0.43    0.39
  14  15   0    0.46    0.35
 -15  14   0    0.27    0.51
  15 -14   0   -0.08    0.40
  16  13   0    0.37    0.48
  16  13   0    0.72    0.38
 -13  16   0   -0.99    0.49
  13 -16   0   -0.40    0.64
 -13  16   0    1.44    0.54
 -16 -13   0    0.49    0.43
 -13  16   0    1.14    0.40
  13 -16   0    0.71    0.43
  13 -16   0    0.97    0.45
 -16 -13   0    0.23    0.41
 -16 -13   0    1.12    0.54
  16  13   0    0.74    0.50
  16  12   0    1.12    0.44
 -16 -12   0    0.21    0.42
 -12  16   0    1.24    0.49
 -12  16   0    0.65    0.49
  12 -16   0    0.09    0.39
 -16 -12   0   -0.38    0.38
  12 -16   0    0.22    0.36
  12 -16   0    0.04    0.55
  16  12   0    0.10    0.34
 -16 -12   0   -0.01    0.45
  16  12   0    0.12    0.44
  11 -16   0   -0.18    0.55
 -11  16   0    0.04    0.41
 -11  16   0   -0.22    0.42
  16  11   0    0.32    0.38
  11 -16   0   -0.10    0.36
 -11  16   0    0.54    0.35
  11 -16   0    0.81    0.36
  16  11   0   -0.13    0.32
  16  11   0   -0.13    0.39
 -16 -11   0   -0.18    0.43
 -16 -11   0    0.09    0.35
 -10  16   0    2.97    0.40
 -16 -10   0    2.68    0.50
  16  10   0    3.06    0.51
 -10  16   0    2.75    0.46
  10 -16   0    2.08    0.43
 -16 -10   0    2.18    0.41
 -16 -10   0    2.35    0.41
  16  10   0    3.14    0.45
  10 -16   0    1.78    0.35
  16  10   0    2.19    0.37
 -16  -9   0    1.32    0.35
  16   9   0    0.55    0.31
  16   9   0    0.69    0.38
   9 -16   0    1.07    0.31
  -9  16   0    0.79    0.42
  -9  16   0    0.62    0.35
  -9  16   0    1.26    0.33
 -16  -9   0    1.07    0.34
   9 -16   0    0.66    0.33
  16   9   0    1.25    0.37
  16   8   0    2.89    0.41
  -8  16   0    2.24    0.45
  -8  16   0    3.43    0.49
 -16  -8   0    2.51    0.38
  16   8   0    2.13    0.39
 -16  -8   0    1.95    0.34
  -8  16   0    2.65    0.40
   8 -16   0    3.02    0.41
   8 -16   0    1.58    0.42
  16   8   0    2.24    0.41
 -16  -7   0    2.20    0.39
  -7  16   0    2.58    0.43
  -7  16   0    2.14    0.36
   7 -16   0    2.06    0.40
 -16  -7   0    2.07    0.48
  16   7   0    2.17    0.42
  16   7   0    1.88    0.36
  -6  16   0    4.05    0.56
 -16  -6   0    5.72    0.69
  16   6   0    5.46    0.63
  -6  16   0    4.87    0.59
 -16  -6   0    4.07    0.55
  16   6   0    4.06    0.51
   6 -16   0    4.12    0.53
  -5  16   0    1.03    0.27
   5 -16   0    0.92    0.30
 -16  -5   0    1.25    0.40
 -16  -5   0    1.39    0.32
  16   5   0    0.73    0.35
  16   5   0    0.68    0.30
  -5  16   0    0.32    0.32
  -4  16   0    4.59    0.53
 -16  -4   0    4.50    0.53
   4 -16   0    4.18    0.60
  -4  16   0    4.22    0.47
  16   4   0    5.33    0.52
 -16  -4   0    4.97    0.63
  16   4   0    5.15    0.56
  -3  16   0    0.26    0.28
 -16  -3   0   -0.33    0.24
   3 -16   0    0.51    0.24
  16   3   0    0.16    0.27
  -3  16   0   -0.33    0.19
  16   3   0   -0.19    0.24
  -3  16   0    0.10    0.27
 -16  -3   0    0.27    0.31
  16   2   0    6.08    0.57
  -2  16   0    5.45    0.50
   2 -16   0    5.32    0.49
  -2  16   0    4.59    0.54
 -16  -2   0    4.44    0.48
 -16  -2   0    4.60    0.62
 -16  -1   0    1.47    0.36
 -16  -1   0    1.22    0.29
  -1  16   0    1.64    0.29
  -1  16   0    0.66    0.30
  16   1   0    1.59    0.32
   1 -16   0    1.52    0.28
   0 -16   0    1.61    0.30
   0  16   0    1.72    0.34
 -16   0   0    1.59    0.31
 -16   0   0    1.59    0.39
  16   0   0    1.34    0.31
 -16   0   0    1.02    0.32
  -1 -16   0    1.63    0.33
  -1 -16   0    1.57    0.28
 -16   1   0    1.53    0.29
  16  -1   0    0.74    0.25
   1  16   0    1.10    0.29
   2  16   0    5.60    0.56
 -16   2   0    5.30    0.53
  -2 -16   0    5.88    0.51
  -2 -16   0    5.66    0.54
  16  -2   0    4.64    0.49
  16  -3   0    0.26    0.24
  -3 -16   0    0.20    0.25
  -3 -16   0    0.06    0.23
 -16   3   0   -0.04    0.25
   3  16   0    0.11    0.22
  16  -3   0    0.06    0.22
  -4 -16   0    4.24    0.54
   4  16   0    4.23    0.51
  -4 -16   0    3.98    0.50
  16  -4   0    5.12    0.52
 -16   4   0    4.10    0.47
  -5 -16   0    0.74    0.29
  -5 -16   0    0.53    0.23
   5  16   0    0.85    0.27
 -16   5   0    0.62    0.28
  16  -5   0    0.16    0.27
  -5 -16   0    0.73    0.27
 -16   6   0    4.54    0.50
  -6 -16   0    4.04    0.44
   6  16   0    4.97    0.52
  -6 -16   0    4.58    0.55
  -6 -16   0    5.18    0.58
  16  -6   0    4.40    0.53
  -7 -16   0    2.07    0.38
  16  -7   0    1.75    0.38
   7  16   0    3.39    0.46
 -16   7   0    2.03    0.35
  -7 -16   0    1.84    0.39
  -7 -16   0    2.12    0.31
   8  16   0    2.46    0.42
 -16   8   0    4.10    0.57
  -8 -16   0    4.23    0.55
  -8 -16   0    2.15    0.42
   8  16   0    3.79    0.50
  -8 -16   0    3.37    0.47
  16  -8   0    3.58    0.47
 -16   8   0    2.72    0.42
  -8 -16   0    2.19    0.33
  16  -8   0    4.17    0.59
  16  -9   0    1.04    0.33
 -16   9   0    1.10    0.32
  -9 -16   0    1.29    0.35
  -9 -16   0    0.55    0.29
  -9 -16   0    0.66    0.29
  -9 -16   0    0.44    0.36
  16  -9   0    0.71    0.32
  16  -9   0    1.71    0.42
   9  16   0    1.06    0.31
   9  16   0    0.91    0.32
 -16   9   0    1.21    0.36
 -10 -16   0    1.66    0.37
  10  16   0    2.59    0.38
  16 -10   0    3.02    0.45
 -16  10   0    2.33    0.41
  16 -10   0    1.75    0.41
 -10 -16   0    2.98    0.44
  16 -10   0    2.14    0.37
  10  16   0    2.31    0.37
 -10 -16   0    2.59    0.38
 -10 -16   0    2.41    0.47
 -16  10   0    2.22    0.43
  16 -11   0    0.42    0.44
 -16  11   0   -0.01    0.40
  16 -11   0    0.23    0.38
 -11 -16   0    0.57    0.36
 -11 -16   0    0.20    0.33
 -11 -16   0    0.24    0.41
  11  16   0    0.40    0.30
 -16  11   0    0.04    0.33
  11  16   0    0.55    0.39
 -11 -16   0    0.05    0.32
  16 -11   0    0.09    0.35
  12  16   0    1.05    0.32
  12  16   0    0.55    0.41
  16 -12   0    1.00    0.41
 -12 -16   0    0.11    0.45
 -12 -16   0    0.82    0.39
  16 -12   0   -0.70    0.47
 -16  12   0    1.13    0.40
 -12 -16   0    0.68    0.37
 -16  12   0   -0.22    0.44
 -12 -16   0    0.70    0.40
  16 -12   0    0.71    0.37
 -13 -16   0    1.97    0.46
 -13 -16   0    0.90    0.43
  16 -13   0    1.21    0.45
  16 -13   0   -0.18    0.56
  13  16   0    0.02    0.34
  13  16   0    0.20    0.47
 -16  13   0    0.94    0.49
  16 -13   0    0.69    0.40
 -16  13   0    1.18    0.40
 -13 -16   0    0.72    0.39
 -16  13   0    0.45    0.47
 -17 -12   0    0.16    0.44
  12 -17   0   -0.37    0.58
  12 -17   0   -0.88    0.42
 -17 -12   0   -0.92    0.44
  17  12   0    0.08    0.52
 -12  17   0   -0.40    0.36
 -12  17   0    0.05    0.53
  17  12   0    0.29    0.48
  17  12   0   -0.34    0.37
 -17 -12   0   -0.57    0.49
  12 -17   0   -0.84    0.41
  17  11   0   -0.24    0.35
  11 -17   0    0.50    0.43
 -11  17   0    0.24    0.34
 -11  17   0    0.39    0.49
 -17 -11   0    0.18    0.49
 -11  17   0   -0.07    0.47
 -17 -11   0   -0.20    0.40
  17  11   0   -0.16    0.44
 -17 -11   0    0.71    0.40
  11 -17   0    0.36    0.65
  17  11   0    1.19    0.44
  11 -17   0    1.22    0.40
  17  10   0    1.03    0.42
 -17 -10   0    1.12    0.48
 -10  17   0    0.10    0.36
  17  10   0    0.02    0.33
 -10  17   0    0.80    0.42
  10 -17   0    0.68    0.54
  10 -17   0    0.37    0.37
  17  10   0    0.50    0.45
  10 -17   0    0.25    0.40
 -10  17   0    0.82    0.45
 -17 -10   0   -0.70    0.34
 -17 -10   0    0.05    0.35
 -17  -9   0    0.84    0.45
 -17  -9   0    0.72    0.35
 -17  -9   0    1.10    0.40
   9 -17   0    0.15    0.41
  17   9   0    1.04    0.37
  -9  17   0    0.63    0.41
  17   9   0    0.28    0.39
   9 -17   0    0.77    0.32
   9 -17   0    0.24    0.45
  17   9   0   -0.08    0.30
  -9  17   0    1.03    0.30
  -8  17   0    0.58    0.42
  -8  17   0    0.86    0.41
 -17  -8   0   -0.10    0.45
 -17  -8   0    0.35    0.32
   8 -17   0    1.42    0.35
   8 -17   0    1.33    0.40
  17   8   0    0.58    0.38
 -17  -8   0    0.82    0.33
  17   8   0    0.59    0.31
  17   8   0    0.48    0.36
  -8  17   0    1.12    0.30
 -17  -7   0    1.11    0.44
  -7  17   0    1.16    0.37
  17   7   0    0.74    0.31
 -17  -7   0    1.15    0.34
  -7  17   0    1.23    0.42
 -17  -7   0    1.88    0.38
   7 -17   0    1.22    0.39
   7 -17   0    1.58    0.35
  17   7   0    1.05    0.35
  17   7   0    1.19    0.42
  -7  17   0    1.20    0.32
  -6  17   0    0.17    0.35
  17   6   0   -0.11    0.28
 -17  -6   0    0.15    0.39
 -17  -6   0   -0.34    0.27
   6 -17   0   -0.03    0.32
 -17  -6   0    0.02    0.30
  17   6   0   -0.30    0.36
  -6  17   0    0.64    0.40
  17   6   0    0.00    0.29
  -6  17   0    0.13    0.24
   6 -17   0   -0.13    0.31
  17   5   0   11.22    0.78
 -17  -5   0   11.66    0.76
 -17  -5   0   11.83    0.88
  -5  17   0   11.01    0.70
  -5  17   0   11.49    0.77
   5 -17   0   10.12    0.72
  -5  17   0   10.25    0.80
   5 -17   0   10.11    0.78
  17   5   0   10.57    0.73
  17   5   0   13.33    0.84
  17   4   0    0.39    0.35
  17   4   0   -0.14    0.28
 -17  -4   0    0.10    0.31
   4 -17   0    0.26    0.32
 -17  -4   0    0.05    0.39
  -4  17   0   -0.16    0.23
  -4  17   0    0.06    0.32
 -17  -3   0    4.93    0.58
   3 -17   0    4.69    0.64
  -3  17   0    5.58    0.59
  17   3   0    4.77    0.57
  17   3   0    6.00    0.63
 -17  -3   0    5.40    0.65
  -3  17   0    4.80    0.55
  -2  17   0    0.78    0.31
  17   2   0    0.76    0.34
 -17  -2   0    0.72    0.38
   2 -17   0    1.24    0.38
 -17  -2   0    0.04    0.28
  17   2   0    1.14    0.35
  -1  17   0   10.08    0.72
   1 -17   0   10.53    0.78
  -1  17   0    9.89    0.67
 -17  -1   0   11.39    0.76
  17   1   0    9.52    0.73
 -17  -1   0   10.75    0.82
  17   1   0   11.93    0.78
   0 -17   0    0.15    0.30
 -17   0   0    0.05    0.32
  17   0   0    0.08    0.27
   0  17   0    0.04    0.26
  17   0   0    0.37    0.29
 -17   0   0    0.15    0.31
  -1 -17   0   10.69    0.73
   1  17   0   10.31    0.68
  -1 -17   0    9.90    0.77
  17  -1   0    9.63    0.71
  17  -1   0    9.67    0.72
 -17   1   0   10.05    0.69
  17  -2   0    0.68    0.32
  -2 -17   0    1.06    0.35
  -2 -17   0    0.60    0.31
   2  17   0    0.30    0.27
 -17   2   0    0.54    0.28
  17  -2   0    0.17    0.27
  -3 -17   0    5.10    0.56
  17  -3   0    4.77    0.55
   3  17   0    4.13    0.50
  17  -3   0    5.91    0.59
  -3 -17   0    6.03    0.62
 -17   3   0    4.70    0.55
   4  17   0    0.24    0.29
  -4 -17   0   -0.21    0.32
  -4 -17   0   -0.04    0.29
  17  -4   0   -0.07    0.30
 -17   4   0   -0.16    0.28
  17  -4   0    0.11    0.23
   4  17   0   -0.39    0.26
   5  17   0   12.63    0.78
   5  17   0   11.60    0.82
  17  -5   0   11.93    0.81
  -5 -17   0   12.34    0.82
  17  -5   0    9.93    0.72
 -17   5   0   13.30    0.81
  -5 -17   0   12.28    0.76
   6  17   0    1.05    0.35
  -6 -17   0    0.25    0.23
  17  -6   0    0.30    0.29
 -17   6   0    0.04    0.27
  -6 -17   0   -0.05    0.27
  -6 -17   0    0.34    0.31
  -6 -17   0    0.21    0.30
 -17   6   0    0.10    0.31
  17  -6   0   -0.12    0.27
   6  17   0    0.14    0.25
   7  17   0    1.21    0.31
   7  17   0    0.83    0.37
 -17   7   0    0.52    0.35
  -7 -17   0    0.89    0.33
  17  -7   0    0.40    0.34
  -7 -17   0    0.99    0.28
  17  -7   0    1.34    0.35
  -7 -17   0    0.89    0.34
 -17   7   0    1.22    0.33
  -7 -17   0    0.99    0.37
  -8 -17   0    0.27    0.26
 -17   8   0    0.56    0.37
   8  17   0    0.96    0.35
  -8 -17   0    0.78    0.37
  -8 -17   0    0.04    0.32
  17  -8   0    0.85    0.36
  -8 -17   0    0.90    0.38
  17  -8   0    0.83    0.31
  17  -8   0    0.93    0.37
   8  17   0    0.17    0.28
 -17   8   0    0.75    0.34
  -9 -17   0    0.58    0.39
 -17   9   0    0.58    0.41
   9  17   0    0.94    0.32
  17  -9   0    0.51    0.45
  -9 -17   0    1.27    0.38
  -9 -17   0    0.55    0.35
  -9 -17   0    0.64    0.30
   9  17   0    0.30    0.42
 -17   9   0    0.60    0.32
  17  -9   0    0.91    0.34
  17  -9   0    1.41    0.37
  10  17   0    0.29    0.42
  17 -10   0    0.14    0.35
 -17  10   0    0.67    0.41
  17 -10   0    0.50    0.37
  17 -10   0    0.44    0.47
 -10 -17   0    0.58    0.37
 -10 -17   0    1.26    0.37
 -17  10   0    0.33    0.35
 -10 -17   0    0.60    0.31
 -10 -17   0    0.60    0.44
  10  17   0    0.44    0.34
 -11 -17   0   -0.01    0.35
 -11 -17   0   -0.36    0.46
 -17  11   0    0.87    0.49
 -11 -17   0    0.97    0.39
  17 -11   0    0.57    0.45
 -17  11   0    0.23    0.35
  17 -11   0    0.36    0.38
 -11 -17   0    0.42    0.34
  11  17   0    1.28    0.35
  11  17   0    0.81    0.44
  17 -11   0    1.63    0.50
 -12 -17   0   -0.47    0.41
  12  17   0    0.38    0.34
  17 -12   0    0.41    0.55
 -17  12   0   -0.38    0.48
 -17  12   0    0.22    0.39
  17 -12   0    1.11    0.47
 -12 -17   0   -0.44    0.39
  12  17   0    1.34    0.48
  10 -18   0    0.18    0.42
 -10  18   0    0.25    0.40
  10 -18   0    1.09    0.66
 -18 -10   0   -0.40    0.41
  10 -18   0    0.03    0.42
 -18 -10   0    0.17    0.41
  18  10   0   -0.01    0.37
 -10  18   0   -0.16    0.49
 -10  18   0    0.59    0.54
 -18 -10   0    0.00    0.53
  18  10   0    0.77    0.52
  18  10   0    0.72    0.49
  -9  18   0    1.74    0.53
 -18  -9   0    1.65    0.46
   9 -18   0    2.25    0.67
  18   9   0    2.19    0.44
   9 -18   0    1.57    0.46
  18   9   0    1.27    0.38
  -9  18   0    2.11    0.41
  18   9   0    2.32    0.52
 -18  -9   0    2.03    0.58
   9 -18   0    2.26    0.40
 -18  -9   0    1.87    0.47
  -9  18   0    1.48    0.50
 -18  -8   0   -0.17    0.34
 -18  -8   0    0.26    0.35
   8 -18   0   -0.03    0.36
   8 -18   0    0.21    0.39
  -8  18   0    0.55    0.34
  -8  18   0    0.57    0.43
  18   8   0   -0.26    0.36
  -8  18   0   -0.10    0.41
 -18  -8   0    0.10    0.46
  18   8   0    0.75    0.43
  18   8   0   -0.03    0.40
 -18  -7   0    0.44    0.34
 -18  -7   0    0.03    0.35
   7 -18   0    0.71    0.33
  18   7   0   -0.17    0.34
  -7  18   0   -0.32    0.40
  -7  18   0    0.89    0.29
  18   7   0   -0.18    0.40
   7 -18   0    0.01    0.34
 -18  -7   0    0.18    0.46
  18   7   0   -0.79    0.30
  -7  18   0   -0.29    0.40
 -18  -6   0    1.10    0.46
   6 -18   0    0.63    0.35
 -18  -6   0    1.84    0.38
  -6  18   0    1.11    0.43
   6 -18   0   -0.04    0.37
  -6  18   0    1.53    0.42
  18   6   0    0.97    0.40
 -18  -6   0    0.60    0.36
  18   6   0    1.74    0.39
  18   6   0    1.11    0.37
  -6  18   0    0.46    0.28
  18   5   0    0.40    0.31
  18   5   0    0.27    0.39
  -5  18   0    0.32    0.25
  -5  18   0    0.26    0.37
   5 -18   0    0.97    0.37
  18   5   0    0.70    0.33
 -18  -5   0    0.98    0.46
 -18  -5   0    0.03    0.31
   5 -18   0    0.29    0.34
 -18  -5   0   -0.33    0.32
  -5  18   0    0.54    0.41
  18   4   0    1.88    0.36
 -18  -4   0    2.88    0.44
 -18  -4   0    2.47    0.42
  -4  18   0    2.34    0.45
  -4  18   0    3.32    0.46
   4 -18   0    2.55    0.37
   4 -18   0    3.10    0.47
  -4  18   0    2.66    0.43
 -18  -4   0    2.23    0.55
  18   4   0    2.73    0.41
  18   4   0    2.53    0.46
 -18  -3   0   -0.01    0.40
   3 -18   0    1.14    0.33
   3 -18   0    1.03    0.36
 -18  -3   0    0.13    0.32
  18   3   0    0.75    0.31
  -3  18   0    0.72    0.36
 -18  -3   0    0.24    0.31
  18   3   0    0.33    0.33
  -3  18   0    0.33    0.35
  -3  18   0    0.17    0.26
  18   3   0    0.75    0.32
  18   2   0    2.48    0.40
 -18  -2   0    2.38    0.51
  -2  18   0    1.68    0.44
  -2  18   0    1.79    0.36
 -18  -2   0    1.87    0.38
   2 -18   0    1.89    0.37
 -18  -2   0    1.21    0.34
   2 -18   0    1.89    0.35
  18   2   0    1.59    0.33
  18   2   0    1.86    0.40
   1 -18   0    0.36    0.35
   1 -18   0   -0.24    0.26
  18   1   0    0.17    0.30
  18   1   0    0.24    0.32
 -18  -1   0   -0.72    0.29
  18   1   0   -0.13    0.26
  -1  18   0   -0.07    0.26
 -18  -1   0   -0.63    0.36
  -1  18   0   -0.67    0.33
 -18  -1   0   -0.27    0.28
  18   0   0    0.64    0.34
   0 -18   0    0.46    0.32
   0 -18   0    0.05    0.31
 -18   0   0    0.59    0.32
  18   0   0    1.14    0.36
   0 -18   0    0.40    0.28
   0  18   0    0.26    0.32
 -18   0   0    0.23    0.30
   0  18   0    0.54    0.31
  18   0   0   -0.38    0.26
   1  18   0    0.64    0.36
  18  -1   0   -0.35    0.31
  18  -1   0   -0.56    0.27
 -18   1   0   -0.60    0.28
  18  -1   0   -0.37    0.30
  -1 -18   0    0.00    0.29
   1  18   0   -0.21    0.26
  -1 -18   0   -0.39    0.28
  -1 -18   0   -0.55    0.30
 -18   1   0   -0.68    0.29
 -18   2   0    1.65    0.40
   2  18   0    1.59    0.39
 -18   2   0    1.90    0.35
  -2 -18   0    2.36    0.41
   2  18   0    1.32    0.34
  18  -2   0    2.14    0.38
  18  -2   0    1.79    0.37
  -2 -18   0    2.38    0.36
  -2 -18   0    2.15    0.39
  18  -2   0    0.99    0.32
  18  -3   0    0.77    0.31
 -18   3   0    0.65    0.34
  -3 -18   0    0.40    0.30
   3  18   0    0.81    0.41
 -18   3   0   -0.10    0.31
  -3 -18   0    0.96    0.35
  18  -3   0    0.81    0.31
   3  18   0    0.35    0.28
  18  -3   0   -0.01    0.30
  -3 -18   0    1.01    0.32
  18  -4   0    4.30    0.59
  -4 -18   0    2.76    0.42
 -18   4   0    2.57    0.40
 -18   4   0    2.61    0.47
   4  18   0    2.43    0.38
  -4 -18   0    2.18    0.36
  18  -4   0    2.32    0.40
  -4 -18   0    2.54    0.43
  18  -4   0    2.83    0.45
   4  18   0    2.28    0.43
  -5 -18   0    0.16    0.33
 -18   5   0    0.25    0.31
 -18   5   0   -0.26    0.35
   5  18   0    0.01    0.36
  18  -5   0    0.88    0.31
   5  18   0    0.00    0.29
  18  -5   0    0.03    0.32
  -5 -18   0    0.80    0.33
  -5 -18   0   -0.06    0.31
  18  -5   0   -0.20    0.30
  -6 -18   0    1.61    0.40
  18  -6   0    0.84    0.40
  -6 -18   0    0.41    0.35
 -18   6   0    0.63    0.39
 -18   6   0    0.89    0.31
   6  18   0    0.92    0.39
  -6 -18   0    1.53    0.39
  18  -6   0    0.97    0.36
  18  -6   0    0.58    0.32
   6  18   0    1.58    0.34
  -7 -18   0   -0.47    0.31
  -7 -18   0   -0.30    0.38
  -7 -18   0    0.21    0.25
   7  18   0    0.10    0.30
  18  -7   0   -0.13    0.42
  -7 -18   0    0.17    0.38
  18  -7   0   -0.70    0.31
 -18   7   0    0.46    0.32
   7  18   0    0.26    0.40
  -8 -18   0    0.11    0.35
  18  -8   0    0.22    0.35
 -18   8   0    0.53    0.34
  18  -8   0    0.97    0.39
 -18   8   0    0.24    0.39
  -8 -18   0    0.51    0.37
   8  18   0    0.64    0.44
  -8 -18   0   -0.23    0.27
   8  18   0   -0.19    0.32
  -8 -18   0    0.22    0.40
  18  -8   0   -0.15    0.35
  18  -9   0    3.00    0.53
 -18   9   0    1.48    0.41
   9  18   0    1.14    0.45
  -9 -18   0    1.96    0.35
  18  -9   0    1.61    0.40
   9  18   0    2.26    0.40
 -18   9   0    1.78    0.50
  -9 -18   0    2.25    0.45
  -9 -18   0    2.07    0.48
  -9 -18   0    1.60    0.41
 -18  10   0    0.29    0.40
  10  18   0    0.58    0.37
 -10 -18   0    1.50    0.41
  10  18   0   -0.15    0.46
 -18  10   0    0.82    0.50
  18 -10   0    0.01    0.40
 -10 -18   0    0.35    0.41
  18 -10   0    0.82    0.45
  18 -10   0    1.27    0.51
 -10 -18   0   -0.13    0.47
 -10 -18   0    0.00    0.32
 -19  -8   0   -0.06    0.55
 -19  -8   0   -0.81    0.39
   8 -19   0    0.17    0.37
 -19  -8   0    0.69    0.41
  19   8   0    0.20    0.47
  -8  19   0    0.52    0.55
   8 -19   0   -0.10    0.43
  19   8   0   -0.21    0.44
  -8  19   0    0.50    0.34
 -19  -7   0   -0.14    0.37
  -7  19   0   -0.21    0.45
  19   7   0   -0.28    0.46
 -19  -7   0    0.39    0.57
  19   7   0    0.65    0.42
 -19  -7   0    0.36    0.42
  -7  19   0   -0.16    0.45
   7 -19   0   -0.12    0.39
  -7  19   0   -0.19    0.28
 -19  -6   0    0.24    0.38
  19   6   0    0.38    0.37
  -6  19   0    0.24    0.44
  -6  19   0    0.60    0.27
 -19  -6   0    0.79    0.52
  19   6   0   -0.56    0.38
   6 -19   0   -0.14    0.37
  -6  19   0    0.64    0.47
   6 -19   0   -0.51    0.39
  19   6   0    1.02    0.45
 -19  -6   0   -0.93    0.36
  -5  19   0    1.17    0.29
 -19  -5   0    0.22    0.36
   5 -19   0    0.73    0.39
  19   5   0    0.66    0.36
   5 -19   0    0.19    0.39
 -19  -5   0   -0.05    0.38
  19   5   0    0.19    0.38
  19   5   0    0.12    0.44
  -5  19   0    0.18    0.42
 -19  -5   0   -0.16    0.54
  -5  19   0    0.76    0.42
  -4  19   0    0.69    0.29
   4 -19   0    1.13    0.38
  19   4   0    0.35    0.38
 -19  -4   0    0.37    0.36
  19   4   0    0.58    0.45
 -19  -4   0    0.50    0.50
 -19  -4   0    0.63    0.40
  -4  19   0    0.75    0.43
  19   4   0    0.37    0.35
   4 -19   0    0.98    0.36
  -4  19   0    0.07    0.39
 -19  -3   0    0.70    0.46
  -3  19   0    0.78    0.39
  19   3   0    0.09    0.33
  -3  19   0   -0.01    0.34
 -19  -3   0   -0.13    0.32
 -19  -3   0   -0.08    0.35
  19   3   0    0.29    0.37
   3 -19   0    0.24    0.38
  19   3   0   -0.33    0.40
   3 -19   0    1.05    0.37
  -2  19   0    1.05    0.35
 -19  -2   0    1.58    0.49
  19   2   0    1.35    0.34
 -19  -2   0    0.47    0.36
   2 -19   0    0.99    0.38
  19   2   0    2.18    0.38
  -2  19   0    1.40    0.38
  -2  19   0    1.74    0.46
  19   2   0    1.76    0.45
   2 -19   0    1.92    0.36
 -19  -2   0    1.25    0.39
  19   1   0   -0.42    0.32
   1 -19   0    0.63    0.33
  19   1   0   -0.28    0.34
  -1  19   0    0.98    0.40
 -19  -1   0   -0.51    0.33
 -19  -1   0    0.23    0.35
  -1  19   0    0.20    0.32
  19   1   0    0.50    0.35
   1 -19   0    0.27    0.29
  19   0   0   -0.03    0.33
   0  19   0    0.53    0.31
   0 -19   0    0.41    0.37
   0 -19   0    1.05    0.29
   0 -19   0    0.71    0.35
 -19   0   0    0.52    0.33
  19   0   0    0.49    0.34
  19   0   0    0.85    0.33
   0  19   0    0.43    0.38
 -19   0   0   -0.54    0.35
  -1 -19   0   -0.04    0.38
  19  -1   0   -0.10    0.33
  -1 -19   0    0.56    0.32
   1  19   0   -0.32    0.28
  19  -1   0    0.33    0.37
  -1 -19   0   -0.02    0.31
 -19   1   0   -0.08    0.29
 -19   1   0    0.06    0.36
  19  -1   0    0.02    0.34
  -2 -19   0    1.09    0.33
 -19   2   0    1.39    0.37
   2  19   0    1.75    0.42
  19  -2   0    0.76    0.35
 -19   2   0    1.42    0.40
  19  -2   0    0.40    0.31
  19  -2   0    1.06    0.36
  -2 -19   0    1.10    0.41
   2  19   0    1.53    0.35
  -2 -19   0    0.92    0.40
 -19   3   0    0.08    0.29
  19  -3   0    1.36    0.37
   3  19   0    0.50    0.42
  19  -3   0    0.23    0.34
  -3 -19   0   -0.13    0.29
  -3 -19   0   -0.08    0.37
   3  19   0    0.26    0.32
 -19   3   0   -0.01    0.35
  -3 -19   0    0.41    0.35
   4  19   0    0.59    0.42
  -4 -19   0    0.52    0.37
   4  19   0    0.63    0.32
  -4 -19   0   -0.01    0.33
 -19   4   0    0.16    0.41
  19  -4   0    0.20    0.39
  -4 -19   0    0.62    0.41
 -19   4   0    0.39    0.34
  19  -5   0    1.18    0.38
   5  19   0    0.39    0.34
  19  -5   0   -0.41    0.37
  19  -5   0   -0.68    0.37
   5  19   0    1.20    0.47
 -19   5   0    0.21    0.43
  -5 -19   0    1.00    0.41
  -5 -19   0    0.90    0.38
  -5 -19   0   -0.68    0.33
 -19   5   0    0.35    0.33
  -6 -19   0    0.07    0.37
  -6 -19   0   -0.76    0.37
 -19   6   0   -0.46    0.33
  19  -6   0    1.00    0.40
   6  19   0   -0.60    0.32
  19  -6   0   -0.53    0.43
  19  -6   0   -0.02    0.37
 -19   6   0    0.25    0.45
  -6 -19   0    0.09    0.38
   6  19   0    0.69    0.44
  19  -7   0   -0.32    0.36
   7  19   0   -0.33    0.42
  -7 -19   0   -0.01    0.40
 -19   7   0   -0.12    0.46
  19  -7   0    0.83    0.49
  -7 -19   0   -0.19    0.39
  -7 -19   0    0.60    0.45
 -19   7   0    0.40    0.39
  19  -7   0   -0.58    0.39
   7  19   0   -0.26    0.33
 -19   8   0    0.24    0.48
  19  -8   0   -0.21    0.46
  19  -8   0    0.24    0.41
  19  -8   0   -0.32    0.39
   8  19   0    0.65    0.49
  -8 -19   0   -0.11    0.43
  -8 -19   0    0.32    0.42
  -8 -19   0    0.39    0.42
   8  19   0   -0.80    0.35
 -19   8   0   -0.11    0.37
   5 -20   0    0.58    0.45
 -20  -5   0   -0.32    0.39
  -5  20   0   -0.66    0.51
  -5  20   0    0.24    0.34
   5 -20   0    0.58    0.41
  20   5   0    0.28    0.47
  20   5   0   -0.28    0.42
  -5  20   0    0.09    0.48
 -20  -5   0   -0.46    0.54
  20   5   0   -0.20    0.42
 -20  -5   0   -0.51    0.36
  20   4   0   -0.32    0.41
   4 -20   0    0.18    0.39
  20   4   0   -0.02    0.39
 -20  -4   0    0.40    0.53
  -4  20   0    0.07    0.41
 -20  -4   0    0.15    0.40
   4 -20   0    0.79    0.43
 -20  -4   0   -0.07    0.43
  20   4   0    0.24    0.46
  -4  20   0    0.68    0.51
 -20  -3   0    0.40    0.44
  20   3   0   -0.52    0.37
   3 -20   0    0.65    0.42
  -3  20   0   -0.02    0.38
  -3  20   0   -0.48    0.33
 -20  -3   0   -0.18    0.38
  20   3   0    0.19    0.40
  20   3   0    0.33    0.43
 -20  -3   0   -0.51    0.48
   3 -20   0    0.30    0.39
  -3  20   0    1.05    0.52
  20   2   0    0.58    0.46
 -20  -2   0   -0.65    0.43
  20   2   0    0.30    0.38
 -20  -2   0   -0.24    0.46
   2 -20   0    0.48    0.37
  -2  20   0   -0.72    0.33
  20   2   0    1.39    0.43
 -20  -2   0    0.30    0.36
   2 -20   0    0.03    0.39
  -2  20   0    1.06    0.46
  -1  20   0    1.38    0.45
  -1  20   0    1.10    0.38
   1 -20   0    0.87    0.37
 -20  -1   0    1.19    0.43
   1 -20   0    1.21    0.43
  20   1   0    1.22    0.39
  20   1   0    1.00    0.50
  20   1   0    1.89    0.44
 -20  -1   0   -0.26    0.41
   0 -20   0    0.93    0.35
  20   0   0    0.00    0.40
   0 -20   0    0.98    0.42
 -20   0   0   -0.44    0.42
  20   0   0   -0.05    0.41
   0  20   0    0.61    0.34
   0  20   0    0.70    0.45
   0 -20   0    0.61    0.45
  20   0   0    1.25    0.38
 -20   0   0    0.68    0.37
  -1 -20   0    1.53    0.44
  20  -1   0    0.26    0.36
  -1 -20   0    0.57    0.43
 -20   1   0    0.84    0.45
  -1 -20   0    1.16    0.38
  20  -1   0    0.82    0.42
 -20   1   0    0.68    0.42
   1  20   0    1.25    0.44
   1  20   0    1.17    0.37
  20  -1   0    1.27    0.42
  -2 -20   0    1.18    0.43
   2  20   0    1.33    0.48
  20  -2   0    1.33    0.40
 -20   2   0    0.22    0.39
   2  20   0    0.02    0.34
 -20   2   0   -0.24    0.42
  20  -2   0    0.42    0.40
  -2 -20   0   -0.17    0.36
  -2 -20   0   -0.16    0.37
  20  -2   0    0.29    0.38
   3  20   0    0.03    0.36
  -3 -20   0    0.11    0.42
  -3 -20   0   -0.14    0.37
  20  -3   0    0.11    0.40
 -20   3   0   -0.50    0.43
   3  20   0    0.89    0.47
  20  -3   0   -0.23    0.42
  20  -3   0    0.30    0.38
  -3 -20   0   -0.37    0.39
 -20   3   0    0.31    0.38
  20  -4   0   -0.63    0.38
  20  -4   0    0.11    0.41
   4  20   0   -0.04    0.35
  -4 -20   0   -0.31    0.39
 -20   4   0   -0.92    0.40
   4  20   0    0.37    0.44
  -4 -20   0   -0.06    0.36
 -20   4   0    1.10    0.40
  -4 -20   0   -0.05    0.39
  20  -4   0    0.17    0.42
 -20   5   0    0.77    0.49
  20  -5   0   -0.22    0.42
  -5 -20   0    0.32    0.43
   5  20   0    0.05    0.34
  20  -5   0    1.28    0.44
  20  -5   0   -0.66    0.41
   5  20   0    0.20    0.49
  -5 -20   0   -0.15    0.41
 -20   5   0    1.31    0.42
  -5 -20   0    0.54    0.43
   1  -2  -1   28.56    1.08
  -2  -1  -1   29.29    1.08
   2   1  -1   30.00    1.07
   1  -2  -1   26.93    1.08
   1  -2  -1   27.84    1.07
  -2  -1  -1   29.74    1.05
   2   1  -1   30.37    1.08
  -2  -1  -1   30.02    1.08
  -1   2  -1   27.74    1.08
   2   1  -1   30.08    1.03
   2   1   1   27.01    1.07
  -1   2   1   30.18    1.08
  -2  -1   1   27.87    1.07
   2   1   1   28.56    1.08
  -2  -1   1   27.26    1.03
   1  -2   1   28.36    1.08
  -1   2   1   29.88    1.07
  -1   2   1   29.06    1.08
   1  -2   1   28.84    1.07
   2   1   1   27.21    1.04
  -2   0  -1  939.66   34.53
   0  -2  -1 1000.00   34.59
  -2   0  -1  967.85   33.33
  -2   0  -1  925.23   34.55
   2   0  -1  976.67   34.53
   2   0  -1  977.99   34.54
   0  -2  -1  937.61   34.53
   2   0  -1  955.84   33.29
   2   0   1  882.94   34.54
   2   0   1  962.54   33.32
   0   2   1  930.55   34.54
   0   2   1  974.20   34.59
   0  -2   1  902.75   34.54
  -2   1  -1   26.65    1.05
   1   2  -1   29.81    1.02
  -1  -2  -1   29.65    1.08
   2  -1  -1   27.52    1.07
  -2   1  -1   28.14    1.08
  -2   1  -1   27.01    1.07
  -1  -2  -1   30.84    1.08
  -1  -2  -1   28.98    1.04
   1   2  -1   30.45    1.08
   2  -1  -1   27.60    1.08
  -2   1   1   29.87    1.08
   1   2   1   28.20    1.08
   2  -1   1   30.33    1.08
   1   2   1   27.22    1.04
   2  -1   1   29.55    1.08
  -1  -2   1   28.28    1.08
  -1  -2   1   27.84    1.07
   1   2   1   27.26    1.07
   2  -1   1   29.81    1.05
  -2   1   1   31.04    1.08
   2   2  -1   -0.01    0.06
   2   2  -1    0.01    0.04
  -2   2  -1   -0.03    0.06
  -2   2  -1   -0.05    0.07
  -2  -2  -1    0.04    0.07
   2  -2  -1   -0.02    0.06
   2  -2  -1   -0.01    0.07
  -2  -2  -1   -0.02    0.06
   2   2  -1    0.00    0.05
  -2  -2  -1    0.04    0.06
   2   2   1   -0.05    0.07
  -2  -2   1    0.02    0.05
   2  -2   1    0.03    0.06
  -2   2   1    0.04    0.07
   2  -2   1    0.04    0.07
  -2  -2   1    0.03    0.06
   2   2   1   -0.01    0.06
  -2   2   1    0.03    0.07
  -2  -2   1    0.01    0.06
   2  -2   1    0.01    0.07
   2   2   1    0.00    0.06
  -3  -2  -1   33.35    1.27
  -3  -2  -1   34.83    1.31
   2  -3  -1   35.79    1.31
  -3  -2  -1   34.96    1.31
  -2   3  -1   35.14    1.31
   2  -3  -1   34.13    1.32
   3   2  -1   34.71    1.26
  -2   3  -1   35.27    1.32
   3   2  -1   34.77    1.31
   3   2  -1   34.54    1.31
  -3  -2   1   34.70    1.26
  -3  -2   1   33.34    1.31
  -2   3   1   36.29    1.32
   2  -3   1   33.96    1.32
   2  -3   1   33.86    1.31
  -3  -2   1   35.18    1.31
   3   2   1   35.04    1.31
  -2   3   1   33.95    1.31
   3   2   1   35.01    1.31
  -2   3   1   34.53    1.32
   3   2   1   34.10    1.27
  -3  -1  -1   23.84    0.91
   1  -3  -1   25.97    0.94
   3   1  -1   24.28    0.93
   3   1  -1   23.12    0.90
  -1   3  -1   25.95    0.94
   1  -3  -1   25.21    0.93
  -3  -1  -1   23.79    0.93
   1  -3  -1   25.15    0.93
  -1   3  -1   24.83    0.93
  -3  -1  -1   21.84    0.93
   3   1  -1   23.27    0.93
   1  -3   1   23.52    0.93
  -3  -1   1   25.14    0.93
  -3  -1   1   24.53    0.90
   3   1   1   25.31    0.93
  -1   3   1   23.97    0.94
  -1   3   1   23.06    0.92
   3   1   1   25.25    0.93
  -3  -1   1   25.14    0.93
   3   1   1   24.30    0.91
   1  -3   1   23.04    0.92
  -1   3   1   22.77    0.93
  -3   0  -1   16.76    0.65
  -3   0  -1   16.95    0.66
   0  -3  -1   16.44    0.65
   3   0  -1   17.14    0.66
  -3   0  -1   16.30    0.66
   3   0  -1   16.92    0.66
   3   0  -1   17.47    0.65
   0   3  -1   16.36    0.66
   0  -3  -1   16.54    0.65
   3   0   1   15.78    0.66
   3   0   1   17.10    0.65
  -3   0   1   16.91    0.65
   0   3   1   16.66    0.67
   0   3   1   16.69    0.66
   0   3   1   17.44    0.65
   0  -3   1   16.73    0.65
   0  -3   1   17.03    0.66
  -3   0   1   16.64    0.66
   3   0   1   16.84    0.66
  -3   0   1   16.93    0.66
  -1  -3  -1   23.73    0.93
   3  -1  -1   25.36    0.93
  -1  -3  -1   22.11    0.93
   3  -1  -1   24.89    0.94
  -1  -3  -1   22.94    0.90
   3  -1  -1   26.82    0.94
  -3   1  -1   25.89    0.95
  -3   1  -1   24.50    0.92
   1   3  -1   21.53    0.93
  -1  -3  -1   24.05    0.94
  -3   1  -1   25.89    0.94
  -1  -3   1   25.27    0.93
  -1  -3   1   24.70    0.88
   3  -1   1   23.30    0.93
   1   3   1   26.18    0.95
  -3   1   1   23.94    0.94
   1   3   1   26.09    0.93
   3  -1   1   22.53    0.92
  -3   1   1   23.85    0.93
  -1  -3   1   25.49    0.94
   3  -1   1   24.30    0.94
  -3   2  -1   35.38    1.33
   3  -2  -1   35.54    1.33
   3  -2  -1   34.95    1.31
   2   3  -1   33.94    1.25
  -3   2  -1   34.80    1.29
   2   3  -1   34.80    1.31
  -3   2  -1   35.16    1.32
  -2  -3  -1   35.01    1.32
   2   3  -1   34.69    1.32
  -2  -3  -1   35.04    1.31
  -2  -3  -1   32.98    1.27
  -3   2   1   35.87    1.32
   3  -2   1   34.59    1.31
   2   3   1   35.61    1.31
   2   3   1   33.55    1.27
  -3   2   1   34.50    1.31
   3  -2   1   34.20    1.29
  -2  -3   1   34.96    1.32
  -2  -3   1   34.33    1.25
   2   3   1   35.10    1.32
  -2  -3   1   35.01    1.31
   3  -2   1   35.08    1.33
  -3  -3  -1   -0.03    0.08
   3   3  -1    0.02    0.08
  -3  -3  -1    0.00    0.09
   3   3  -1    0.03    0.10
   3  -3  -1    0.06    0.10
  -3   3  -1    0.03    0.10
  -3   3  -1   -0.03    0.09
   3   3  -1    0.00    0.07
   3  -3  -1   -0.06    0.10
  -3  -3  -1   -0.03    0.08
  -3  -3   1   -0.01    0.09
   3  -3   1    0.00    0.09
  -3  -3   1    0.00    0.07
   3   3   1    0.04    0.08
   3   3   1   -0.05    0.08
  -3   3   1   -0.03    0.09
   3   3   1    0.08    0.10
  -3   3   1   -0.06    0.09
   3  -3   1    0.09    0.10
  -3  -3   1    0.08    0.08
   3  -3   1    0.05    0.10
   3  -4  -1   52.09    1.99
  -4  -3  -1   51.76    1.92
   4   3  -1   55.00    2.00
   4   3  -1   53.44    1.91
  -3   4  -1   50.80    1.99
   3  -4  -1   51.59    2.01
  -4  -3  -1   53.52    2.00
   4   3  -1   53.99    1.99
  -3   4  -1   53.05    2.01
  -4  -3  -1   54.10    1.99
  -3   4   1   53.37    2.01
  -4  -3   1   52.70    1.99
   4   3   1   53.53    1.99
   4   3   1   51.39    1.99
   3  -4   1   52.90    1.99
   4   3   1   51.20    1.92
  -3   4   1   54.36    1.99
   3  -4   1   54.94    2.01
  -4  -3   1   51.28    1.91
   4   2  -1   52.53    1.95
   4   2  -1   53.85    2.03
  -4  -2  -1   53.55    1.97
  -4  -2  -1   55.28    2.03
   4   2  -1   55.58    2.03
  -2   4  -1   53.28    2.04
   2  -4  -1   54.33    2.03
  -4  -2  -1   53.75    2.03
   2  -4  -1   56.02    2.05
  -2   4  -1   53.99    2.03
  -4  -2   1   55.41    2.03
   2  -4   1   55.34    2.04
   4   2   1   53.91    2.03
  -2   4   1   55.12    2.05
  -2   4   1   54.42    2.03
   2  -4   1   52.73    2.03
   4   2   1   51.78    1.96
  -2   4   1   55.00    2.03
   4   2   1   55.25    2.04
  -4  -2   1   53.38    1.96
   4   1  -1    9.39    0.39
   4   1  -1    8.80    0.39
   1  -4  -1    8.33    0.40
   1  -4  -1    8.52    0.38
  -1   4  -1    8.46    0.39
   1  -4  -1    8.40    0.38
  -4  -1  -1    8.67    0.39
   4   1  -1    8.92    0.39
  -1   4  -1    7.97    0.40
  -4  -1  -1    8.77    0.39
   1  -4   1    8.96    0.40
   4   1   1    8.11    0.39
  -1   4   1    8.90    0.40
   4   1   1    8.01    0.38
  -4  -1   1    8.09    0.38
  -1   4   1    9.16    0.39
  -4  -1   1    7.70    0.38
  -4  -1   1    7.87    0.38
   4   1   1    7.77    0.38
  -1   4   1    9.71    0.39
   0   4  -1    0.95    0.10
   4   0  -1    1.16    0.16
  -4   0  -1    1.02    0.14
   4   0  -1    1.18    0.14
   0   4  -1    1.18    0.14
   0  -4  -1    1.17    0.15
   4   0  -1    1.26    0.15
  -4   0  -1    1.10    0.14
   0  -4  -1    1.06    0.14
   0   4  -1    1.17    0.15
  -4   0  -1    1.26    0.16
   0  -4  -1    1.23    0.15
   0  -4   1    1.33    0.17
   4   0   1    0.85    0.13
   0  -4   1    1.16    0.15
   0   4   1    1.24    0.17
   4   0   1    0.93    0.12
   0   4   1    1.12    0.14
  -4   0   1    1.21    0.15
  -4   0   1    1.11    0.15
  -4   0   1    1.26    0.15
   4   0   1    1.20    0.14
   0   4   1    1.18    0.14
  -1  -4  -1    9.06    0.37
  -1  -4  -1    8.68    0.40
   1   4  -1    8.77    0.38
   4  -1  -1    8.34    0.40
  -4   1  -1    8.88    0.40
  -4   1  -1    7.77    0.39
   4  -1  -1    7.91    0.39
  -1  -4  -1    9.41    0.38
  -4   1  -1    7.97    0.38
   4  -1  -1    8.15    0.38
  -1  -4   1    7.73    0.39
   1   4   1    7.97    0.37
  -1  -4   1    7.90    0.37
  -4   1   1    8.50    0.39
   1   4   1    7.86    0.39
   4  -1   1    8.71    0.39
   4  -1   1    8.96    0.40
   4  -1   1    8.56    0.39
  -1  -4   1    8.38    0.33
   2   4  -1   55.35    1.94
  -4   2  -1   53.54    1.99
  -4   2  -1   53.25    2.04
  -2  -4  -1   54.88    2.05
  -2  -4  -1   53.56    1.96
   4  -2  -1   52.70    2.04
   2   4  -1   56.41    2.05
   2   4  -1   54.01    2.03
   4  -2  -1   54.93    2.04
  -2  -4  -1   55.00    2.03
  -4   2  -1   53.62    2.05
  -4   2   1   55.87    2.05
   2   4   1   55.15    2.05
   2   4   1   54.77    2.03
  -2  -4   1   52.08    2.03
   4  -2   1   56.10    2.04
  -2  -4   1   53.28    1.94
   4  -2   1   54.93    2.05
  -2  -4   1   54.40    2.04
   4  -2   1   53.45    1.99
  -4   2   1   55.10    2.04
  -3  -4  -1   54.65    2.00
  -3  -4  -1   54.42    1.93
   3   4  -1   53.52    1.91
   3   4  -1   54.71    2.01
   3   4  -1   52.83    2.00
  -4   3  -1   53.00    2.00
   4  -3  -1   53.05    2.00
  -3  -4  -1   54.45    2.01
  -4   3  -1   52.33    2.02
   4  -3  -1   52.70    2.01
  -3  -4   1   52.54    2.00
   4  -3   1   53.83    2.00
   3   4   1   52.31    2.01
   3   4   1   53.78    2.00
   3   4   1   49.89    1.92
   4  -3   1   53.39    2.02
  -3  -4   1   51.06    1.91
  -4   3   1   54.18    2.01
  -3  -4   1   53.08    2.00
   4  -3   1   53.67    1.95
  -4   3   1   53.28    2.00
  -4  -4  -1   -0.05    0.10
  -4  -4  -1    0.02    0.10
   4  -4  -1   -0.09    0.11
   4   4  -1    0.05    0.08
  -4   4  -1    0.10    0.12
  -4  -4  -1   -0.05    0.09
   4   4  -1   -0.03    0.09
  -4   4  -1    0.01    0.10
   4  -4  -1    0.09    0.11
   4   4  -1    0.04    0.10
  -4  -4   1   -0.04    0.09
  -4  -4   1   -0.05    0.09
   4  -4   1   -0.01    0.10
   4   4   1   -0.09    0.10
   4   4   1    0.11    0.09
  -4  -4   1    0.04    0.08
  -4   4   1   -0.03    0.09
   4  -4   1   -0.03    0.12
  -4   4   1    0.09    0.12
   4   4   1    0.11    0.09
   4  -4   1   -0.01    0.11
  -5  -4  -1   42.23    1.65
   4  -5  -1   41.89    1.67
  -5  -4  -1   43.00    1.66
  -5  -4  -1   42.91    1.60
   5   4  -1   44.86    1.58
  -4   5  -1   41.89    1.65
   4  -5  -1   43.16    1.65
   5   4  -1   43.63    1.65
  -4   5  -1   41.14    1.67
   5   4  -1   42.48    1.65
  -5  -4   1   43.07    1.58
  -4   5   1   44.65    1.67
   4  -5   1   44.33    1.67
  -5  -4   1   43.19    1.65
   5   4   1   41.08    1.65
   5   4   1   42.10    1.65
   5   4   1   42.10    1.59
   4  -5   1   43.75    1.65
  -4   5   1   44.63    1.65
  -5  -4   1   40.91    1.64
  -5  -3  -1    5.75    0.33
   5   3  -1    5.66    0.29
  -5  -3  -1    6.10    0.32
  -3   5  -1    5.25    0.31
   5   3  -1    5.62    0.32
  -5  -3  -1    5.75    0.32
  -3   5  -1    5.26    0.32
   3  -5  -1    5.03    0.31
   3  -5  -1    5.61    0.34
  -5  -3   1    5.21    0.31
  -5  -3   1    5.28    0.31
   5   3   1    5.40    0.32
   5   3   1    5.42    0.31
  -3   5   1    5.91    0.32
  -5  -3   1    5.46    0.30
  -3   5   1    5.55    0.34
   3  -5   1    5.48    0.33
   3  -5   1    5.62    0.31
  -3   5   1    5.80    0.31
   5   3   1    5.29    0.31
   5   2  -1    2.09    0.19
  -2   5  -1    1.78    0.23
   2  -5  -1    1.91    0.23
  -5  -2  -1    2.20    0.21
  -5  -2  -1    1.88    0.21
   5   2  -1    2.08    0.21
  -5  -2  -1    2.16    0.21
   2  -5  -1    2.10    0.19
   5   2  -1    2.20    0.20
  -2   5  -1    1.99    0.20
   5   2   1    1.75    0.20
   2  -5   1    2.05    0.20
  -2   5   1    2.00    0.22
   2  -5   1    1.86    0.22
  -5  -2   1    1.93    0.20
  -2   5   1    1.87    0.20
   5   2   1    1.80    0.20
  -5  -2   1    1.85    0.19
  -2   5   1    2.11    0.20
  -5  -2   1    2.13    0.21
   5   2   1    1.81    0.20
   5   1  -1  105.75    3.90
  -1   5  -1  103.85    3.90
   5   1  -1  105.73    3.77
  -1   5  -1  104.68    3.92
  -5  -1  -1  108.12    3.90
  -1   5  -1  102.04    3.87
  -5  -1  -1  111.04    3.91
  -5  -1  -1  108.68    3.78
   1  -5  -1  102.09    3.89
   1  -5  -1  103.13    3.90
   1  -5  -1  108.94    3.92
  -5  -1   1  102.37    3.90
  -1   5   1  110.38    3.90
   5   1   1  104.62    3.90
   1  -5   1  108.78    3.91
  -5  -1   1  103.01    3.90
   5   1   1  102.12    3.90
   5   1   1  102.28    3.77
   1  -5   1  108.35    3.90
  -1   5   1  106.08    3.89
  -5  -1   1  105.08    3.77
  -1   5   1  108.21    3.92
   0   5  -1   77.11    2.93
   5   0  -1   81.34    2.94
  -5   0  -1   80.37    2.94
   0   5  -1   78.05    2.90
   0   5  -1   78.85    2.95
  -5   0  -1   78.87    2.94
  -5   0  -1   75.58    2.85
   0  -5  -1   79.79    2.95
   0  -5  -1   79.67    2.92
   0  -5  -1   79.23    2.93
   5   0  -1   81.67    2.85
   5   0  -1   77.54    2.94
   0  -5   1   77.91    2.93
  -5   0   1   79.62    2.86
   0   5   1   81.60    2.93
   5   0   1   77.26    2.85
   5   0   1   79.39    2.94
   5   0   1   81.06    2.95
  -5   0   1   76.95    2.94
   0   5   1   79.66    2.92
   0  -5   1   78.08    2.94
   0   5   1   80.30    2.95
  -5   0   1   79.04    2.94
   5  -1  -1  105.31    3.82
  -1  -5  -1  111.76    3.95
   1   5  -1  109.90    3.93
  -1  -5  -1  104.12    3.93
   1   5  -1  107.33    3.89
  -5   1  -1  102.44    3.93
   1   5  -1  109.58    3.95
   5  -1  -1  104.75    3.94
  -1  -5  -1  107.17    3.92
  -5   1  -1  106.13    3.94
   5  -1  -1  106.53    3.94
  -5   1  -1  105.36    3.82
   1   5   1  103.03    3.93
  -1  -5   1  105.56    3.94
   1   5   1  105.32    3.94
   5  -1   1  109.69    3.95
   1   5   1  104.37    3.92
  -5   1   1  108.91    3.93
  -5   1   1  109.77    3.94
  -1  -5   1  102.48    3.93
  -1  -5   1  102.94    3.88
   5  -1   1  108.01    3.81
   5  -1   1  111.61    3.94
   2   5  -1    2.38    0.22
   5  -2  -1    2.23    0.25
  -2  -5  -1    2.22    0.22
  -5   2  -1    2.41    0.22
  -5   2  -1    2.26    0.21
  -2  -5  -1    2.11    0.19
   5  -2  -1    2.25    0.22
   5  -2  -1    1.97    0.21
  -2  -5  -1    2.35    0.21
  -5   2  -1    2.28    0.24
   2   5  -1    2.29    0.20
  -2  -5  -1    2.19    0.18
  -2  -5   1    1.86    0.13
   5  -2   1    2.24    0.24
   2   5   1    2.31    0.22
   2   5   1    2.38    0.20
  -5   2   1    2.27    0.21
   5  -2   1    2.30    0.22
   5  -2   1    2.23    0.21
  -2  -5   1    2.10    0.21
  -5   2   1    2.22    0.20
  -2  -5   1    2.04    0.16
  -2  -5   1    1.82    0.19
  -3  -5  -1    5.79    0.30
   5  -3  -1    5.11    0.34
   5  -3  -1    5.11    0.30
   3   5  -1    5.63    0.31
  -5   3  -1    5.41    0.33
  -5   3  -1    5.60    0.32
  -3  -5  -1    5.97    0.32
   3   5  -1    5.65    0.33
  -3  -5  -1    5.79    0.33
   3   5  -1    5.72    0.28
   5  -3  -1    5.67    0.34
  -5   3   1    5.82    0.32
   5  -3   1    5.93    0.35
  -3  -5   1    5.46    0.27
  -5   3   1    5.77    0.33
  -3  -5   1    5.32    0.32
   3   5   1    5.71    0.30
   3   5   1    5.58    0.33
   5  -3   1    5.75    0.32
   5  -3   1    5.71    0.33
   3   5   1    5.50    0.31
   5  -4  -1   43.19    1.66
  -4  -5  -1   42.10    1.65
   4   5  -1   42.86    1.65
   4   5  -1   42.32    1.67
   4   5  -1   43.76    1.58
   5  -4  -1   40.92    1.67
  -4  -5  -1   45.39    1.67
  -4  -5  -1   43.25    1.60
  -5   4  -1   42.74    1.68
  -5   4  -1   41.58    1.65
   5  -4   1   43.16    1.68
   5  -4   1   43.59    1.63
  -5   4   1   44.48    1.68
   4   5   1   42.43    1.67
  -4  -5   1   42.23    1.65
   5  -4   1   43.38    1.66
  -4  -5   1   43.31    1.66
   4   5   1   41.66    1.65
  -5   4   1   45.57    1.66
  -4  -5   1   42.73    1.58
   4   5   1   43.76    1.60
   5   5  -1    0.00    0.09
   5   5  -1   -0.14    0.13
  -5   5  -1    0.00    0.12
   5  -5  -1   -0.13    0.13
  -5  -5  -1   -0.04    0.11
  -5   5  -1   -0.05    0.13
   5  -5  -1   -0.09    0.13
  -5  -5  -1   -0.14    0.12
  -5  -5  -1   -0.13    0.11
   5   5  -1   -0.11    0.11
   5   5   1   -0.13    0.11
   5   5   1   -0.07    0.12
  -5   5   1    0.07    0.12
  -5  -5   1    0.09    0.11
   5  -5   1   -0.09    0.13
  -5  -5   1    0.01    0.10
  -5  -5   1   -0.02    0.11
   5   5   1   -0.04    0.10
   5  -5   1    0.05    0.14
   5  -5   1    0.04    0.13
  -5   5   1    0.02    0.13
  -6  -5  -1   59.58    2.24
   6   5  -1   57.95    2.25
   6   5  -1   57.04    2.23
  -6  -5  -1   56.35    2.16
  -5   6  -1   58.57    2.26
   5  -6  -1   59.65    2.27
  -5   6  -1   59.09    2.24
  -6  -5  -1   57.64    2.24
   6   5  -1   58.02    2.14
   5  -6  -1   58.92    2.24
   5  -6   1   57.62    2.26
  -5   6   1   56.39    2.23
  -6  -5   1   60.02    2.23
   5  -6   1   58.55    2.23
   6   5   1   60.04    2.25
  -6  -5   1   58.17    2.15
   6   5   1   58.55    2.16
   5  -6   1   60.04    2.19
   6   5   1   58.04    2.23
  -6  -5   1   59.37    2.24
  -5   6   1   58.07    2.26
   4  -6  -1    6.05    0.41
   6   4  -1    7.50    0.37
  -6  -4  -1    7.13    0.40
  -4   6  -1    5.51    0.38
  -6  -4  -1    7.44    0.39
   6   4  -1    7.62    0.40
  -6  -4  -1    7.53    0.39
  -4   6  -1    5.99    0.41
   4  -6  -1    5.79    0.38
   6   4  -1    7.64    0.39
  -6  -4   1    6.03    0.37
   6   4   1    6.26    0.39
  -4   6   1    7.55    0.38
  -6  -4   1    6.26    0.36
  -4   6   1    7.71    0.42
  -4   6   1    7.13    0.40
   6   4   1    6.05    0.37
   4  -6   1    7.56    0.39
   6   4   1    5.70    0.36
   4  -6   1    7.63    0.42
  -3   6  -1   78.40    2.94
   6   3  -1   78.75    2.81
  -6  -3  -1   80.49    2.83
   6   3  -1   75.10    2.92
   6   3  -1   77.16    2.92
  -3   6  -1   76.66    2.92
   3  -6  -1   76.98    2.92
  -6  -3  -1   78.53    2.92
  -6  -3  -1   78.94    2.93
   3  -6  -1   77.63    2.94
   3  -6   1   78.85    2.94
  -3   6   1   75.31    2.93
   3  -6   1   79.68    2.92
   6   3   1   76.94    2.82
  -6  -3   1   77.12    2.82
  -6  -3   1   79.39    2.92
   6   3   1   77.36    2.92
  -6  -3   1   77.67    2.91
  -3   6   1   77.87    2.91
   6   3   1   77.80    2.92
  -3   6   1   78.14    2.92
   6   2  -1    5.38    0.32
   2  -6  -1    7.08    0.35
  -6  -2  -1    4.96    0.34
  -6  -2  -1    5.04    0.33
   6   2  -1    4.58    0.33
  -2   6  -1    6.63    0.37
  -6  -2  -1    5.15    0.34
   2  -6  -1    7.02    0.38
   6   2   1    6.69    0.35
  -6  -2   1    6.97    0.34
  -2   6   1    5.34    0.36
  -2   6   1    5.41    0.32
   6   2   1    7.20    0.36
   2  -6   1    5.10    0.33
  -6  -2   1    7.05    0.35
   2  -6   1    5.10    0.36
  -2   6   1    4.90    0.33
   1  -6  -1  115.84    4.36
  -6  -1  -1  116.85    4.36
   1  -6  -1  120.73    4.35
   6   1  -1  117.54    4.22
  -1   6  -1  114.61    4.37
  -1   6  -1  119.02    4.36
  -6  -1  -1  119.50    4.23
  -1   6  -1  118.29    4.33
   1  -6  -1  120.97    4.38
   6   1  -1  116.38    4.36
  -6  -1  -1  114.56    4.36
   6   1  -1  113.25    4.36
   6   1   1  119.96    4.37
  -6  -1   1  116.67    4.22
   6   1   1  121.06    4.22
  -1   6   1  116.54    4.38
  -6  -1   1  116.50    4.36
  -6  -1   1  118.18    4.36
  -1   6   1  119.88    4.36
  -1   6   1  118.89    4.35
   1  -6   1  119.57    4.38
   1  -6   1  119.26    4.36
   6   1   1  119.94    4.37
   0   6  -1   27.29    1.02
  -6   0  -1   26.45    1.07
   0  -6  -1   27.09    1.05
   6   0  -1   26.63    1.07
   0   6  -1   26.43    1.08
   0  -6  -1   27.35    1.08
   0  -6  -1   26.10    1.06
   0   6  -1   28.04    1.07
   6   0  -1   27.32    1.06
   6   0  -1   26.44    1.07
  -6   0  -1   26.76    1.07
  -6   0  -1   26.91    1.06
  -6   0   1   26.39    1.06
   0  -6   1   26.74    1.06
   6   0   1   26.09    1.07
   6   0   1   27.23    1.07
   0   6   1   26.57    1.08
  -6   0   1   26.52    1.06
  -6   0   1   26.48    1.06
   0   6   1   26.97    1.06
   6   0   1   25.64    1.05
   0  -6   1   26.51    1.08
   0   6   1   26.85    1.05
  -1  -6  -1  118.62    4.40
   6  -1  -1  119.91    4.40
   1   6  -1  119.89    4.40
   6  -1  -1  118.01    4.39
   1   6  -1  117.87    4.34
   6  -1  -1  113.24    4.25
  -6   1  -1  118.43    4.26
   1   6  -1  120.74    4.39
  -6   1  -1  121.46    4.39
  -6   1  -1  120.93    4.40
  -1  -6  -1  115.94    4.38
  -1  -6  -1  116.39    4.36
   1   6   1  116.84    4.38
   1   6   1  120.60    4.41
  -1  -6   1  120.69    4.38
   6  -1   1  116.85    4.39
   1   6   1  116.98    4.37
  -1  -6   1  122.09    4.40
  -6   1   1  118.07    4.26
   6  -1   1  120.92    4.26
   6  -1   1  119.94    4.40
  -1  -6   1  119.49    4.33
  -6   1   1  119.80    4.39
  -6   1   1  117.23    4.39
  -2  -6  -1    5.35    0.32
  -6   2  -1    7.50    0.41
   6  -2  -1    7.35    0.41
   6  -2  -1    7.43    0.37
  -6   2  -1    7.47    0.38
   2   6  -1    5.14    0.36
  -2  -6  -1    5.39    0.36
   6  -2  -1    7.15    0.38
  -2  -6  -1    5.09    0.34
  -6   2  -1    7.42    0.37
   2   6  -1    5.06    0.34
  -2  -6  -1    5.32    0.31
  -2  -6   1    7.64    0.38
   6  -2   1    5.59    0.38
   2   6   1    7.75    0.36
  -2  -6   1    7.29    0.28
   6  -2   1    5.38    0.36
  -2  -6   1    7.30    0.36
   6  -2   1    5.13    0.35
  -2  -6   1    7.29    0.31
  -6   2   1    5.48    0.35
   2   6   1    7.30    0.38
  -6   2   1    5.45    0.35
   6  -3  -1   77.93    2.88
   6  -3  -1   78.15    2.94
  -6   3  -1   78.29    2.87
   3   6  -1   79.32    2.95
  -3  -6  -1   79.85    2.93
  -6   3  -1   77.83    2.95
   3   6  -1   76.99    2.93
  -3  -6  -1   79.36    2.95
  -6   3  -1   78.05    2.94
   6  -3  -1   78.52    2.96
  -3  -6  -1   76.96    2.83
  -3  -6   1   77.12    2.94
   6  -3   1   78.84    2.96
   3   6   1   77.14    2.95
  -6   3   1   77.11    2.93
  -3  -6   1   78.02    2.93
  -6   3   1   81.31    2.95
  -3  -6   1   77.53    2.80
   6  -3   1   81.21    2.87
   3   6   1   76.29    2.93
   6  -3   1   79.57    2.94
  -4  -6  -1    7.81    0.41
   6  -4  -1    6.28    0.43
   4   6  -1    7.38    0.38
   6  -4  -1    5.94    0.38
  -4  -6  -1    7.55    0.37
  -6   4  -1    6.10    0.40
   6  -4  -1    6.09    0.40
  -6   4  -1    6.14    0.39
  -4  -6  -1    7.73    0.39
   4   6  -1    7.79    0.41
   4   6  -1    7.83    0.35
  -4  -6   1    6.31    0.38
   6  -4   1    7.90    0.40
   6  -4   1    7.22    0.43
  -4  -6   1    5.98    0.34
   4   6   1    6.06    0.36
   4   6   1    6.21    0.37
  -4  -6   1    5.94    0.38
  -6   4   1    7.48    0.41
   6  -4   1    7.62    0.42
  -6   4   1    7.50    0.39
   4   6   1    6.32    0.40
   5   6  -1   58.63    2.13
  -5  -6  -1   56.53    2.23
  -5  -6  -1   55.80    2.24
   5   6  -1   55.33    2.22
  -6   5  -1   58.66    2.26
  -6   5  -1   59.03    2.24
   6  -5  -1   61.46    2.24
   6  -5  -1   60.34    2.27
   5   6  -1   57.46    2.25
  -5  -6  -1   58.45    2.15
  -5  -6   1   60.63    2.23
  -6   5   1   57.74    2.23
  -5  -6   1   59.31    2.24
  -6   5   1   58.00    2.25
   5   6   1   59.71    2.15
  -5  -6   1   58.59    2.13
   5   6   1   59.91    2.25
   5   6   1   59.17    2.23
   6  -5   1   58.18    2.20
   6  -5   1   56.95    2.26
   6  -5   1   56.92    2.23
  -6  -6  -1    0.15    0.14
  -6  -6  -1    0.14    0.16
  -6  -6  -1    0.04    0.12
   6  -6  -1    0.08    0.16
   6   6  -1    0.00    0.15
  -6   6  -1   -0.03    0.14
   6   6  -1    0.10    0.14
   6  -6  -1    0.05    0.16
   6   6  -1   -0.05    0.11
  -6   6  -1    0.02    0.14
   6  -6   1    0.05    0.15
   6   6   1    0.01    0.13
  -6   6   1    0.16    0.15
   6   6   1    0.02    0.13
  -6  -6   1    0.12    0.14
   6  -6   1   -0.04    0.16
   6   6   1    0.17    0.16
  -6   6   1    0.06    0.15
  -6  -6   1    0.06    0.13
   6  -6   1    0.06    0.15
  -6  -6   1    0.03    0.12
  -7  -6  -1   41.98    1.66
  -6   7  -1   42.14    1.69
   7   6  -1   41.66    1.66
   7   6  -1   41.33    1.68
   7   6  -1   42.78    1.59
  -7  -6  -1   41.75    1.61
   6  -7  -1   41.94    1.67
  -7  -6  -1   40.87    1.66
   6  -7  -1   41.13    1.70
  -6   7  -1   41.61    1.66
   7   6   1   42.39    1.61
   7   6   1   40.14    1.67
  -6   7   1   44.00    1.70
   6  -7   1   43.11    1.70
  -7  -6   1   41.10    1.59
   7   6   1   40.18    1.65
  -6   7   1   42.83    1.66
  -7  -6   1   41.40    1.65
   6  -7   1   42.10    1.65
  -7  -6   1   41.17    1.67
   6  -7   1   43.61    1.67
   7   5  -1   16.12    0.72
   5  -7  -1   15.80    0.71
  -5   7  -1   15.31    0.74
   7   5  -1   15.55    0.67
  -7  -5  -1   15.18    0.70
  -5   7  -1   14.97    0.70
   7   5  -1   15.38    0.71
  -7  -5  -1   15.87    0.70
  -7  -5  -1   15.92    0.72
   5  -7  -1   15.18    0.73
  -5   7   1   15.43    0.73
  -5   7   1   15.31    0.70
  -7  -5   1   15.16    0.68
   7   5   1   15.06    0.70
  -7  -5   1   15.33    0.71
   5  -7   1   15.09    0.74
  -7  -5   1   14.44    0.69
   7   5   1   15.28    0.72
   5  -7   1   15.43    0.70
   7   5   1   15.58    0.68
   4  -7  -1   33.12    1.34
  -7  -4  -1   35.11    1.35
  -4   7  -1   33.99    1.35
  -7  -4  -1   33.31    1.35
  -4   7  -1   33.81    1.38
  -7  -4  -1   33.53    1.32
   4  -7  -1   30.70    1.36
   7   4  -1   32.93    1.35
   7   4  -1   34.66    1.35
   7   4  -1   33.87    1.29
  -7  -4   1   32.96    1.34
  -4   7   1   34.88    1.38
   4  -7   1   35.06    1.35
   7   4   1   33.23    1.35
  -7  -4   1   33.44    1.31
  -7  -4   1   33.97    1.35
   7   4   1   32.92    1.34
   7   4   1   32.39    1.30
  -4   7   1   33.52    1.34
  -4   7   1   34.59    1.35
   4  -7   1   34.50    1.37
  -7  -3  -1    9.00    0.49
  -7  -3  -1    8.97    0.50
   3  -7  -1   10.50    0.50
   7   3  -1    8.76    0.47
  -3   7  -1   10.54    0.54
  -7  -3  -1    9.50    0.50
   3  -7  -1    9.72    0.51
  -3   7  -1   11.02    0.51
  -3   7   1    9.69    0.53
   7   3   1   10.95    0.50
  -3   7   1    9.56    0.49
   3  -7   1    8.90    0.49
   7   3   1   10.76    0.50
   7   3   1   10.63    0.51
  -7  -3   1   10.71    0.51
  -7  -3   1   10.94    0.49
   3  -7   1    8.87    0.51
   7   2  -1    4.72    0.33
  -2   7  -1    4.64    0.28
   7   2  -1    4.81    0.32
  -7  -2  -1    4.28    0.33
  -7  -2  -1    5.12    0.34
  -7  -2  -1    4.91    0.33
   7   2  -1    4.59    0.30
  -2   7  -1    4.86    0.36
   2  -7  -1    4.60    0.33
  -2   7  -1    4.37    0.32
   2  -7  -1    4.93    0.36
   7   2   1    4.43    0.33
   2  -7   1    4.39    0.32
  -7  -2   1    5.08    0.33
  -7  -2   1    4.41    0.31
  -7  -2   1    4.49    0.32
   2  -7   1    4.63    0.34
   7   2   1    4.88    0.32
  -2   7   1    4.81    0.32
   7   2   1    4.83    0.32
  -2   7   1    4.63    0.31
  -2   7   1    4.48    0.34
  -7  -1  -1   73.50    2.75
   7   1  -1   73.59    2.75
  -7  -1  -1   72.89    2.68
  -1   7  -1   73.07    2.74
   1  -7  -1   72.60    2.74
   1  -7  -1   72.33    2.76
   7   1  -1   74.57    2.67
   1  -7  -1   73.75    2.72
   7   1  -1   73.17    2.75
  -1   7  -1   71.58    2.76
  -7  -1  -1   73.38    2.75
  -1   7  -1   71.16    2.70
   7   1   1   72.77    2.75
  -1   7   1   74.94    2.74
  -1   7   1   72.77    2.73
  -7  -1   1   73.51    2.74
   1  -7   1   71.67    2.74
   7   1   1   70.87    2.74
  -1   7   1   73.35    2.77
   1  -7   1   73.66    2.76
   7   1   1   69.84    2.66
  -7  -1   1   72.91    2.67
  -7  -1   1   73.04    2.74
  -7   0  -1   37.59    1.48
   7   0  -1   38.39    1.49
  -7   0  -1   38.78    1.46
   7   0  -1   37.57    1.47
   0  -7  -1   37.49    1.49
   0   7  -1   37.11    1.42
   0   7  -1   37.77    1.47
   7   0  -1   37.84    1.45
   0   7  -1   37.68    1.49
   0  -7  -1   37.32    1.45
   0  -7  -1   36.27    1.46
  -7   0  -1   37.62    1.48
   7   0   1   36.67    1.47
   0   7   1   37.14    1.49
  -7   0   1   38.38    1.47
   7   0   1   38.89    1.46
   0   7   1   37.48    1.46
   0   7   1   37.06    1.45
   0  -7   1   38.09    1.49
  -7   0   1   37.98    1.47
  -7   0   1   36.97    1.46
   7   0   1   37.51    1.48
   0  -7   1   37.65    1.47
  -1  -7  -1   74.98    2.75
   1   7  -1   73.02    2.75
   1   7  -1   72.74    2.69
   7  -1  -1   73.24    2.75
  -1  -7  -1   72.39    2.72
  -7   1  -1   74.00    2.76
   7  -1  -1   72.01    2.69
  -7   1  -1   73.77    2.76
  -1  -7  -1   72.15    2.77
   1   7  -1   73.19    2.77
  -7   1  -1   73.09    2.70
   7  -1  -1   75.00    2.77
   1   7   1   74.02    2.75
  -7   1   1   74.05    2.76
   7  -1   1   72.12    2.77
   7  -1   1   71.71    2.68
  -7   1   1   72.25    2.70
  -1  -7   1   73.88    2.75
   1   7   1   72.94    2.72
  -7   1   1   71.71    2.75
  -1  -7   1   72.24    2.69
   7  -1   1   72.95    2.75
  -1  -7   1   72.74    2.76
   1   7   1   74.45    2.77
  -2  -7  -1    4.77    0.34
   2   7  -1    4.91    0.35
   7  -2  -1    4.97    0.34
  -7   2  -1    4.84    0.34
  -7   2  -1    4.82    0.33
  -7   2  -1    5.06    0.36
   7  -2  -1    5.23    0.34
  -2  -7  -1    4.80    0.30
  -2  -7  -1    4.92    0.31
  -2  -7  -1    4.41    0.28
   7  -2  -1    4.94    0.37
  -7   2   1    4.80    0.33
  -2  -7   1    4.80    0.28
  -2  -7   1    4.97    0.32
  -2  -7   1    5.22    0.34
  -2  -7   1    4.55    0.24
   7  -2   1    5.21    0.37
   7  -2   1    4.97    0.33
   7  -2   1    4.45    0.33
  -7   2   1    5.33    0.33
   3   7  -1    9.22    0.51
  -7   3  -1   10.79    0.53
   7  -3  -1   10.51    0.51
  -3  -7  -1    9.21    0.46
  -7   3  -1   10.30    0.51
  -3  -7  -1    9.06    0.47
   3   7  -1    8.84    0.49
  -7   3  -1   10.96    0.54
   7  -3  -1   10.94    0.55
  -3  -7  -1    9.05    0.51
   7  -3  -1   10.56    0.53
  -7   3   1    8.90    0.49
   7  -3   1    8.93    0.50
  -3  -7   1   10.52    0.51
   7  -3   1    9.36    0.53
  -3  -7   1   10.50    0.43
   3   7   1   11.09    0.53
   7  -3   1    9.52    0.51
  -3  -7   1   10.62    0.45
   3   7   1   10.84    0.50
  -7   3   1    9.42    0.50
  -3  -7   1   10.56    0.49
  -4  -7  -1   34.72    1.30
  -4  -7  -1   35.13    1.36
   4   7  -1   32.91    1.37
   7  -4  -1   33.18    1.38
   7  -4  -1   32.60    1.35
  -4  -7  -1   34.69    1.37
   7  -4  -1   34.49    1.37
   4   7  -1   33.82    1.35
  -7   4  -1   33.48    1.38
  -7   4  -1   33.08    1.35
  -4  -7   1   33.98    1.28
   7  -4   1   33.40    1.37
   7  -4   1   35.73    1.36
  -4  -7   1   32.42    1.36
   4   7   1   33.11    1.37
  -7   4   1   34.17    1.37
   7  -4   1   34.97    1.36
  -4  -7   1   33.15    1.35
  -7   4   1   34.73    1.35
   4   7   1   34.04    1.35
   5   7  -1   15.51    0.73
  -5  -7  -1   16.24    0.68
  -7   5  -1   15.11    0.71
   7  -5  -1   15.29    0.71
   5   7  -1   15.65    0.70
   7  -5  -1   15.59    0.75
  -5  -7  -1   15.09    0.70
   7  -5  -1   15.11    0.73
   5   7  -1   16.03    0.66
  -5  -7  -1   15.91    0.72
  -7   5  -1   14.54    0.73
  -5  -7   1   14.68    0.65
  -5  -7   1   15.17    0.70
  -7   5   1   15.63    0.71
   7  -5   1   15.48    0.71
   5   7   1   15.64    0.68
   5   7   1   15.51    0.73
  -7   5   1   15.59    0.73
   7  -5   1   15.21    0.73
   7  -5   1   16.13    0.74
   5   7   1   14.83    0.70
  -5  -7   1   15.27    0.72
   6   7  -1   42.05    1.58
   7  -6  -1   40.85    1.66
   6   7  -1   42.24    1.66
  -6  -7  -1   42.08    1.60
   6   7  -1   41.80    1.68
  -6  -7  -1   41.41    1.65
  -7   6  -1   40.65    1.66
  -6  -7  -1   44.01    1.68
   7  -6  -1   40.60    1.69
  -7   6  -1   41.14    1.69
   6   7   1   42.26    1.60
  -7   6   1   42.35    1.66
  -6  -7   1   40.40    1.65
  -6  -7   1   41.76    1.58
  -6  -7   1   41.24    1.66
   7  -6   1   42.95    1.66
  -7   6   1   42.49    1.68
   7  -6   1   43.28    1.65
   6   7   1   41.13    1.68
   6   7   1   40.37    1.65
   7  -6   1   41.58    1.69
   7   7  -1   -0.09    0.14
   7  -7  -1   -0.10    0.15
  -7  -7  -1   -0.07    0.14
  -7   7  -1   -0.11    0.16
   7   7  -1    0.06    0.12
   7  -7  -1   -0.13    0.16
  -7  -7  -1   -0.09    0.16
  -7  -7  -1   -0.24    0.13
  -7   7  -1   -0.23    0.15
   7   7  -1   -0.05    0.14
  -7  -7   1    0.07    0.14
   7   7   1    0.11    0.13
   7   7   1   -0.23    0.11
  -7  -7   1    0.03    0.14
  -7   7   1   -0.09    0.15
   7  -7   1   -0.07    0.16
   7  -7   1    0.02    0.17
   7   7   1   -0.02    0.16
  -7  -7   1    0.12    0.15
  -7   7   1    0.04    0.15
   7  -7   1    0.12    0.15
   7  -8  -1    9.75    0.55
  -8  -7  -1   10.39    0.58
  -8  -7  -1   10.50    0.56
   8   7  -1    9.81    0.58
  -7   8  -1   10.27    0.56
  -8  -7  -1   10.32    0.56
   8   7  -1   10.34    0.53
  -7   8  -1    9.92    0.59
   7  -8  -1    9.76    0.59
   8   7  -1    9.53    0.54
   7  -8   1    9.96    0.59
  -8  -7   1    9.62    0.53
   7  -8   1   10.43    0.59
  -7   8   1   10.68    0.56
   8   7   1   10.06    0.55
  -7   8   1   10.03    0.58
   8   7   1   10.66    0.58
   7  -8   1   10.13    0.56
   8   7   1   10.01    0.54
  -8  -7   1   10.58    0.55
  -8  -7   1   10.39    0.57
  -8  -6  -1   15.03    0.73
   8   6  -1   15.42    0.69
   6  -8  -1   14.77    0.76
   8   6  -1   16.11    0.75
   8   6  -1   14.84    0.73
  -8  -6  -1   14.81    0.72
  -6   8  -1   14.76    0.76
  -8  -6  -1   15.55    0.73
   6  -8  -1   16.26    0.75
  -6   8  -1   16.02    0.74
  -8  -6   1   15.69    0.74
  -6   8   1   16.34    0.77
   6  -8   1   15.46    0.73
   8   6   1   14.99    0.73
  -8  -6   1   15.57    0.72
  -6   8   1   15.90    0.75
   8   6   1   15.24    0.73
   6  -8   1   15.43    0.76
  -6   8   1   15.35    0.73
   8   6   1   16.68    0.72
  -8  -6   1   16.32    0.72
   8   5  -1   13.33    0.63
   8   5  -1   13.51    0.66
  -8  -5  -1   12.96    0.66
  -8  -5  -1   13.91    0.66
  -5   8  -1   14.08    0.70
   8   5  -1   12.71    0.66
   5  -8  -1   14.09    0.67
  -8  -5  -1   13.73    0.67
   5  -8  -1   12.96    0.69
  -5   8  -1   15.26    0.68
   8   5   1   13.94    0.65
  -5   8   1   13.41    0.67
  -8  -5   1   14.56    0.66
  -8  -5   1   14.26    0.67
  -8  -5   1   14.39    0.66
  -5   8   1   13.83    0.66
   5  -8   1   13.90    0.70
   5  -8   1   14.26    0.67
   8   5   1   14.02    0.66
  -5   8   1   13.82    0.69
   8   4  -1   25.04    1.04
   4  -8  -1   27.85    1.13
  -4   8  -1   27.87    1.09
   4  -8  -1   27.18    1.09
  -8  -4  -1   25.13    1.09
   8   4  -1   24.89    1.08
   8   4  -1   25.56    1.10
  -4   8  -1   27.26    1.13
  -8  -4  -1   24.30    1.08
  -8  -4  -1   25.03    1.07
   4  -8   1   24.21    1.07
  -4   8   1   24.56    1.10
  -4   8   1   24.96    1.08
   8   4   1   27.02    1.07
   8   4   1   26.35    1.09
   4  -8   1   24.79    1.11
  -4   8   1   25.06    1.08
  -8  -4   1   27.32    1.09
  -8  -4   1   26.44    1.08
   8   4   1   27.33    1.10
  -8  -4   1   27.53    1.07
  -3   8  -1    9.02    0.51
   3  -8  -1    8.85    0.50
   3  -8  -1    9.16    0.48
   8   3  -1    8.29    0.45
  -3   8  -1    8.98    0.45
  -8  -3  -1    7.52    0.44
  -3   8  -1    8.87    0.47
  -8  -3  -1    8.13    0.46
  -8  -3  -1    8.32    0.48
   8   3  -1    7.62    0.46
   8   3  -1    8.22    0.47
   3  -8   1    7.98    0.49
   8   3   1    8.45    0.47
   8   3   1    9.01    0.48
   8   3   1    9.19    0.47
  -3   8   1    8.49    0.46
   3  -8   1    8.12    0.47
  -3   8   1    7.92    0.46
  -8  -3   1    9.02    0.48
  -8  -3   1    8.40    0.45
   8   2  -1   38.18    1.46
  -2   8  -1   35.07    1.45
   2  -8  -1   35.43    1.45
   8   2  -1   38.95    1.43
  -2   8  -1   35.71    1.48
  -8  -2  -1   36.60    1.46
  -2   8  -1   36.12    1.42
   8   2  -1   36.49    1.46
   2  -8  -1   34.96    1.48
  -8  -2  -1   37.24    1.44
  -8  -2  -1   36.70    1.46
  -8  -2   1   36.10    1.45
   8   2   1   35.72    1.46
   2  -8   1   38.33    1.45
   8   2   1   34.90    1.46
  -2   8   1   37.75    1.44
   2  -8   1   37.72    1.48
  -8  -2   1   34.96    1.44
  -8  -2   1   36.16    1.43
  -2   8   1   38.34    1.46
  -2   8   1   37.03    1.48
   8   2   1   35.91    1.42
   1  -8  -1    5.18    0.37
   8   1  -1    6.55    0.38
  -1   8  -1    4.86    0.36
  -1   8  -1    5.50    0.40
  -8  -1  -1    5.77    0.38
  -8  -1  -1    5.92    0.38
  -8  -1  -1    6.45    0.41
   8   1  -1    6.01    0.37
   8   1  -1    6.28    0.39
  -1   8  -1    5.38    0.31
   1  -8  -1    5.30    0.39
   8   1   1    5.12    0.37
   8   1   1    5.51    0.37
   1  -8   1    6.21    0.38
  -8  -1   1    5.44    0.40
  -1   8   1    5.94    0.36
  -8  -1   1    5.45    0.36
   1  -8   1    5.62    0.39
  -1   8   1    6.01    0.36
  -1   8   1    5.59    0.40
   8   1   1    5.57    0.37
  -8  -1   1    5.32    0.37
  -8   0  -1   59.93    2.23
   0  -8  -1   61.47    2.27
   0   8  -1   59.23    2.26
  -8   0  -1   58.27    2.27
   0   8  -1   58.26    2.21
   0  -8  -1   59.55    2.29
  -8   0  -1   57.95    2.27
   8   0  -1   60.73    2.22
   8   0  -1   56.78    2.27
   8   0  -1   58.63    2.28
   0   8  -1   58.69    2.29
   0  -8  -1   61.81    2.24
  -8   0   1   60.50    2.27
   8   0   1   59.36    2.27
   0   8   1   60.27    2.24
   0  -8   1   60.19    2.26
   0   8   1   57.90    2.26
   0  -8   1   59.05    2.28
   0   8   1   58.20    2.29
  -8   0   1   57.46    2.26
   8   0   1   60.45    2.28
  -8   0   1   57.49    2.23
   8   0   1   59.36    2.22
  -1  -8  -1    5.96    0.37
   8  -1  -1    5.36    0.39
   8  -1  -1    5.29    0.37
  -8   1  -1    5.22    0.38
   1   8  -1    6.05    0.40
   1   8  -1    5.78    0.37
  -8   1  -1    5.83    0.42
   1   8  -1    5.94    0.29
  -8   1  -1    5.20    0.38
  -1  -8  -1    5.88    0.33
   8  -1  -1    5.22    0.37
  -1  -8  -1    6.07    0.39
   8  -1   1    6.16    0.41
   1   8   1    4.85    0.39
   8  -1   1    5.94    0.38
   1   8   1    5.27    0.33
  -1  -8   1    5.26    0.38
  -1  -8   1    5.91    0.29
   1   8   1    5.46    0.36
  -8   1   1    5.96    0.37
  -1  -8   1    5.17    0.36
  -8   1   1    5.97    0.38
   8  -1   1    6.07    0.39
  -8   1   1    5.76    0.42
  -8   2  -1   34.32    1.47
   8  -2  -1   37.12    1.48
  -2  -8  -1   38.28    1.46
  -8   2  -1   34.64    1.46
   2   8  -1   38.13    1.46
  -2  -8  -1   37.53    1.42
  -2  -8  -1   38.18    1.41
   8  -2  -1   36.44    1.47
   2   8  -1   38.39    1.49
  -8   2  -1   36.22    1.46
  -2  -8  -1   36.82    1.48
   8  -2  -1   35.50    1.45
  -8   2   1   37.30    1.47
   2   8   1   35.45    1.45
   8  -2   1   37.44    1.46
  -2  -8   1   36.90    1.38
  -2  -8   1   36.23    1.38
  -2  -8   1   36.10    1.45
   8  -2   1   38.09    1.49
   8  -2   1   37.21    1.46
  -8   2   1   38.43    1.47
  -2  -8   1   35.47    1.47
   2   8   1   35.50    1.48
   8  -3  -1    9.25    0.52
   8  -3  -1    9.10    0.50
   8  -3  -1    8.99    0.48
   3   8  -1    8.07    0.49
  -3  -8  -1    8.12    0.47
  -3  -8  -1    7.60    0.48
  -8   3  -1    8.80    0.48
   3   8  -1    7.68    0.46
  -3  -8  -1    7.96    0.44
  -8   3  -1    8.62    0.49
  -8   3  -1    9.25    0.52
  -3  -8  -1    8.37    0.43
   8  -3   1    8.29    0.47
   3   8   1    8.83    0.49
  -3  -8   1    9.57    0.43
  -3  -8   1    9.03    0.39
  -3  -8   1    8.83    0.48
   8  -3   1    8.91    0.51
   3   8   1    8.51    0.47
  -3  -8   1    8.92    0.47
  -8   3   1    8.43    0.47
  -8   3   1    7.87    0.47
   8  -3   1    8.22    0.49
  -4  -8  -1   24.38    1.09
  -8   4  -1   27.08    1.09
   4   8  -1   24.60    1.08
  -4  -8  -1   24.58    1.03
   8  -4  -1   27.25    1.12
  -4  -8  -1   24.81    1.04
   8  -4  -1   27.48    1.12
   8  -4  -1   26.87    1.09
   4   8  -1   24.70    1.10
  -8   4  -1   25.56    1.10
  -8   4   1   25.19    1.09
   4   8   1   28.03    1.11
   8  -4   1   23.89    1.08
  -4  -8   1   27.09    1.01
  -4  -8   1   26.94    1.02
   8  -4   1   24.52    1.08
  -4  -8   1   27.69    1.08
   8  -4   1   24.71    1.10
  -4  -8   1   26.75    1.10
   4   8   1   27.01    1.08
  -8   4   1   24.74    1.08
  -8   5  -1   13.41    0.68
  -5  -8  -1   13.98    0.63
  -8   5  -1   14.75    0.68
   8  -5  -1   13.30    0.67
  -5  -8  -1   13.33    0.68
   8  -5  -1   13.88    0.70
  -5  -8  -1   13.32    0.66
   5   8  -1   12.73    0.67
   8  -5  -1   14.31    0.72
  -5  -8   1   14.42    0.61
   5   8   1   14.13    0.69
  -8   5   1   13.42    0.68
  -5  -8   1   14.13    0.68
   8  -5   1   13.64    0.70
  -5  -8   1   14.82    0.66
   8  -5   1   13.13    0.67
  -8   5   1   12.91    0.65
   8  -5   1   12.82    0.69
   5   8   1   14.05    0.66
  -6  -8  -1   15.66    0.75
   6   8  -1   15.49    0.68
   6   8  -1   15.24    0.72
  -8   6  -1   15.83    0.74
   8  -6  -1   16.63    0.78
   8  -6  -1   15.88    0.74
  -6  -8  -1   15.08    0.70
  -6  -8  -1   14.33    0.72
  -8   6  -1   15.83    0.76
   8  -6  -1   14.94    0.76
   6   8  -1   15.40    0.75
  -6  -8   1   15.69    0.74
  -6  -8   1   15.22    0.72
  -8   6   1   15.64    0.73
   6   8   1   15.98    0.70
   6   8   1   14.49    0.71
   6   8   1   15.14    0.74
   8  -6   1   15.66    0.77
  -6  -8   1   15.32    0.68
  -8   6   1   15.13    0.75
   8  -6   1   16.44    0.77
   8  -6   1   15.29    0.73
   7   8  -1    9.71    0.55
   8  -7  -1   10.72    0.61
   8  -7  -1   10.14    0.60
  -7  -8  -1   10.24    0.58
   7   8  -1   10.06    0.58
   7   8  -1   11.02    0.52
   8  -7  -1    9.78    0.56
  -8   7  -1   10.41    0.57
  -7  -8  -1   10.21    0.55
  -8   7  -1   10.49    0.60
  -7  -8  -1   10.13    0.56
   7   8   1   10.50    0.59
  -8   7   1   10.38    0.56
  -7  -8   1   10.06    0.55
   8  -7   1    9.83    0.56
  -8   7   1   10.36    0.58
   7   8   1   10.35    0.54
  -7  -8   1   10.47    0.57
   7   8   1   10.26    0.55
  -7  -8   1   10.64    0.53
   8  -7   1   10.17    0.59
   8  -7   1    9.72    0.60
  -8  -8  -1   -0.14    0.17
  -8   8  -1   -0.07    0.17
   8   8  -1   -0.16    0.15
  -8  -8  -1   -0.18    0.16
  -8  -8  -1    0.00    0.18
  -8   8  -1   -0.39    0.16
   8   8  -1   -0.19    0.18
   8  -8  -1   -0.27    0.15
   8   8  -1   -0.20    0.14
   8  -8  -1   -0.36    0.17
  -8  -8   1   -0.30    0.15
  -8  -8   1   -0.11    0.15
   8  -8   1   -0.22    0.18
   8   8   1   -0.27    0.17
   8  -8   1   -0.02    0.15
  -8   8   1   -0.14    0.16
   8   8   1   -0.32    0.14
   8   8   1   -0.10    0.16
   8  -8   1   -0.19    0.20
  -8   8   1   -0.22    0.17
  -8  -8   1   -0.27    0.14
  -9  -8  -1    2.10    0.28
  -8   9  -1    1.97    0.31
   8  -9  -1    1.78    0.31
  -8   9  -1    1.66    0.25
  -9  -8  -1    1.97    0.25
   9   8  -1    2.26    0.31
   9   8  -1    2.15    0.30
   9   8  -1    2.10    0.28
  -9  -8  -1    2.01    0.29
   8  -9  -1    2.35    0.30
  -9  -8   1    1.97    0.26
   9   8   1    1.45    0.25
   8  -9   1    2.04    0.30
   8  -9   1    2.23    0.35
  -9  -8   1    1.93    0.26
   9   8   1    2.29    0.31
   9   8   1    2.15    0.29
  -8   9   1    1.97    0.27
   8  -9   1    1.81    0.26
  -9  -8   1    2.18    0.28
  -8   9   1    1.95    0.28
  -9  -7  -1   27.16    1.18
   9   7  -1   25.13    1.15
  -7   9  -1   27.05    1.20
   9   7  -1   26.80    1.19
   9   7  -1   26.19    1.10
   7  -9  -1   27.34    1.17
   7  -9  -1   26.24    1.19
  -7   9  -1   27.89    1.17
  -9  -7  -1   26.85    1.14
  -9  -7  -1   26.98    1.16
   7  -9   1   26.09    1.19
   9   7   1   28.55    1.19
  -7   9   1   26.63    1.18
   7  -9   1   27.34    1.17
   9   7   1   26.83    1.17
  -7   9   1   27.50    1.16
  -7   9   1   25.46    1.18
   7  -9   1   27.07    1.18
  -9  -7   1   28.12    1.18
   9   7   1   27.38    1.13
  -9  -7   1   27.85    1.15
  -9  -7   1   27.34    1.13
  -9  -6  -1    7.77    0.49
  -9  -6  -1    7.86    0.49
  -6   9  -1    8.54    0.51
   9   6  -1    7.22    0.49
   6  -9  -1    8.38    0.49
  -9  -6  -1    8.05    0.48
  -6   9  -1    8.73    0.55
   9   6  -1    8.06    0.47
   9   6  -1    7.84    0.48
   6  -9  -1    7.54    0.52
  -6   9   1    8.00    0.50
  -9  -6   1    8.45    0.49
   9   6   1    8.09    0.48
   6  -9   1    8.16    0.49
  -9  -6   1    8.35    0.48
  -6   9   1    7.79    0.48
  -6   9   1    8.07    0.52
   9   6   1    8.67    0.52
  -9  -6   1    8.29    0.50
   6  -9   1    7.54    0.51
   9   6   1    8.54    0.48
   9   5  -1   16.98    0.79
   9   5  -1   16.51    0.74
   9   5  -1   16.55    0.77
  -9  -5  -1   16.69    0.77
  -5   9  -1   16.00    0.76
  -5   9  -1   16.14    0.81
  -9  -5  -1   16.42    0.77
   5  -9  -1   16.59    0.81
  -9  -5  -1   16.56    0.78
   5  -9  -1   16.80    0.78
  -5   9   1   16.78    0.80
   5  -9   1   17.00    0.81
  -9  -5   1   15.63    0.76
   9   5   1   16.22    0.77
  -9  -5   1   16.32    0.76
   5  -9   1   17.07    0.78
  -9  -5   1   16.33    0.77
   9   5   1   16.82    0.76
  -5   9   1   17.60    0.77
  -5   9   1   16.43    0.78
   9   5   1   16.22    0.77
   9   4  -1   -0.05    0.13
   4  -9  -1   -0.07    0.15
   9   4  -1    0.08    0.14
   4  -9  -1   -0.02    0.16
  -4   9  -1    0.00    0.13
  -4   9  -1   -0.04    0.16
  -4   9  -1    0.01    0.17
  -9  -4  -1   -0.09    0.13
   9   4  -1   -0.08    0.13
  -9  -4  -1   -0.17    0.15
  -9  -4  -1   -0.08    0.16
  -9  -4   1   -0.15    0.14
   4  -9   1   -0.07    0.15
   9   4   1   -0.09    0.15
  -4   9   1    0.04    0.15
  -4   9   1   -0.11    0.15
   9   4   1    0.12    0.13
   9   4   1   -0.02    0.13
  -9  -4   1   -0.14    0.12
   4  -9   1   -0.24    0.13
  -9  -4   1    0.01    0.16
  -4   9   1    0.00    0.15
   9   3  -1    2.92    0.32
  -9  -3  -1    2.99    0.31
  -9  -3  -1    3.53    0.33
   3  -9  -1    3.60    0.31
   9   3  -1    3.18    0.30
  -9  -3  -1    3.19    0.33
  -3   9  -1    3.77    0.30
  -3   9  -1    3.28    0.34
   9   3  -1    3.47    0.31
   3  -9  -1    3.16    0.34
  -3   9   1    3.71    0.31
   3  -9   1    3.83    0.33
   9   3   1    3.26    0.30
  -9  -3   1    3.29    0.30
   3  -9   1    3.01    0.34
  -3   9   1    3.39    0.31
   9   3   1    3.15    0.31
  -9  -3   1    3.62    0.34
  -9  -3   1    3.68    0.32
   9   3   1    3.30    0.30
  -3   9   1    3.49    0.35
  -9  -2  -1    0.90    0.19
  -2   9  -1    1.00    0.20
   9   2  -1    0.59    0.17
   9   2  -1    1.03    0.20
  -2   9  -1    1.40    0.23
  -9  -2  -1    0.65    0.20
   9   2  -1    0.70    0.17
  -9  -2  -1    1.22    0.22
   2  -9  -1    1.39    0.22
   2  -9  -1    0.84    0.20
   9   2   1    1.55    0.22
  -2   9   1    0.83    0.19
   2  -9   1    0.58    0.19
  -2   9   1    0.67    0.18
   9   2   1    1.50    0.22
  -2   9   1    1.22    0.19
  -9  -2   1    1.04    0.21
  -9  -2   1    1.29    0.21
   9   2   1    1.43    0.22
  -9  -2   1    1.42    0.21
   2  -9   1    0.70    0.18
   1  -9  -1   43.40    1.76
  -9  -1  -1   47.42    1.75
  -9  -1  -1   44.78    1.74
   9   1  -1   43.30    1.74
   9   1  -1   44.70    1.75
  -9  -1  -1   44.95    1.72
   9   1  -1   47.61    1.72
   1  -9  -1   44.55    1.74
  -1   9  -1   43.67    1.73
  -1   9  -1   41.97    1.76
  -1   9  -1   42.53    1.68
   1  -9   1   44.22    1.73
  -1   9   1   47.53    1.74
   9   1   1   41.94    1.73
  -9  -1   1   41.02    1.71
  -9  -1   1   42.99    1.74
  -1   9   1   44.10    1.76
   1  -9   1   45.80    1.77
   9   1   1   42.73    1.74
  -1   9   1   45.02    1.71
  -9  -1   1   42.76    1.73
   9   1   1   42.62    1.70
   0   9  -1    0.14    0.15
  -9   0  -1    0.24    0.17
  -9   0  -1    0.30    0.18
   0  -9  -1    0.22    0.14
   0  -9  -1    0.24    0.16
   0   9  -1    0.35    0.17
  -9   0  -1    0.52    0.17
   9   0  -1    0.33    0.15
   0   9  -1    0.47    0.11
   9   0  -1    0.25    0.17
   9   0  -1    0.09    0.16
   0  -9  -1    0.26    0.16
   0  -9   1    0.13    0.15
  -9   0   1    0.09    0.15
  -9   0   1    0.35    0.15
  -9   0   1    0.41    0.20
   0   9   1    0.26    0.17
   9   0   1    0.17    0.16
   0   9   1    0.26    0.14
   0   9   1    0.27    0.14
   9   0   1    0.37    0.17
   9   0   1    0.24    0.17
   0  -9   1    0.21    0.15
   9  -1  -1   43.51    1.73
   1   9  -1   45.73    1.76
  -1  -9  -1   44.17    1.72
   9  -1  -1   43.29    1.71
  -9   1  -1   41.80    1.73
  -1  -9  -1   45.13    1.75
  -9   1  -1   41.29    1.71
   1   9  -1   45.20    1.66
   9  -1  -1   41.50    1.74
  -1  -9  -1   45.90    1.69
  -9   1  -1   41.03    1.73
   1   9  -1   46.01    1.73
  -9   1   1   46.17    1.73
  -9   1   1   43.92    1.72
   1   9   1   42.88    1.75
   1   9   1   42.69    1.68
   9  -1   1   44.93    1.71
   1   9   1   43.24    1.72
  -9   1   1   44.11    1.73
   9  -1   1   44.90    1.75
   9  -1   1   44.16    1.73
  -1  -9   1   43.37    1.74
  -1  -9   1   42.25    1.71
   2   9  -1    0.77    0.19
  -9   2  -1    1.07    0.23
   9  -2  -1    1.12    0.20
  -9   2  -1    1.20    0.22
  -2  -9  -1    0.94    0.19
  -2  -9  -1    1.15    0.19
  -2  -9  -1    1.13    0.22
   2   9  -1    0.85    0.19
  -9   2  -1    1.16    0.21
  -2  -9  -1    1.10    0.17
   9  -2  -1    1.05    0.22
   9  -2  -1    1.42    0.24
   9  -2   1    0.93    0.18
  -2  -9   1    1.43    0.18
  -2  -9   1    1.49    0.21
  -2  -9   1    1.19    0.17
   2   9   1    1.21    0.23
   9  -2   1    0.86    0.22
   2   9   1    1.09    0.18
  -9   2   1    0.69    0.17
   9  -2   1    0.71    0.19
  -2  -9   1    1.45    0.22
  -9   2   1    0.73    0.19
  -9   3  -1    3.50    0.35
  -9   3  -1    3.66    0.34
  -3  -9  -1    3.84    0.31
  -3  -9  -1    3.08    0.27
   9  -3  -1    3.24    0.33
   3   9  -1    3.37    0.31
  -9   3  -1    3.46    0.33
   3   9  -1    3.24    0.33
  -3  -9  -1    3.63    0.30
   9  -3  -1    3.25    0.33
   9  -3  -1    3.44    0.37
  -3  -9  -1    3.29    0.33
   9  -3   1    3.32    0.32
  -3  -9   1    3.58    0.26
  -3  -9   1    3.57    0.31
   9  -3   1    3.50    0.37
   3   9   1    3.05    0.29
  -9   3   1    3.24    0.32
  -3  -9   1    3.29    0.33
   9  -3   1    3.04    0.31
   3   9   1    3.33    0.34
  -3  -9   1    3.45    0.22
  -9   3   1    3.41    0.33
  -4  -9  -1   -0.27    0.15
  -4  -9  -1   -0.03    0.12
   9  -4  -1    0.07    0.16
  -4  -9  -1   -0.07    0.12
  -4  -9  -1    0.00    0.14
   9  -4  -1    0.01    0.16
  -9   4  -1   -0.08    0.15
   9  -4  -1   -0.05    0.17
  -9   4  -1   -0.04    0.17
   4   9  -1   -0.12    0.15
   4   9  -1   -0.22    0.13
   4   9   1   -0.11    0.13
  -4  -9   1   -0.01    0.14
   4   9   1   -0.18    0.15
  -9   4   1   -0.28    0.14
  -4  -9   1    0.06    0.10
  -4  -9   1   -0.26    0.12
  -4  -9   1    0.07    0.11
  -9   4   1   -0.14    0.13
   9  -4   1   -0.03    0.16
   9  -4   1   -0.22    0.15
   9  -4   1   -0.02    0.15
   5   9  -1   17.00    0.76
   5   9  -1   16.96    0.80
  -9   5  -1   15.89    0.79
   9  -5  -1   16.43    0.81
  -9   5  -1   16.15    0.77
  -5  -9  -1   16.76    0.74
  -5  -9  -1   16.62    0.73
   9  -5  -1   15.72    0.80
   9  -5  -1   16.86    0.78
  -5  -9  -1   17.10    0.80
   9  -5   1   16.75    0.77
  -5  -9   1   16.30    0.69
   9  -5   1   16.45    0.80
  -5  -9   1   16.03    0.71
   5   9   1   16.43    0.76
  -5  -9   1   16.62    0.78
   9  -5   1   16.89    0.81
  -5  -9   1   16.34    0.75
  -9   5   1   16.74    0.77
  -9   5   1   16.30    0.78
   5   9   1   15.97    0.79
   6   9  -1    7.82    0.51
  -6  -9  -1    7.60    0.50
  -9   6  -1    8.30    0.49
  -6  -9  -1    7.72    0.48
   9  -6  -1    8.06    0.49
   9  -6  -1    9.51    0.58
  -6  -9  -1    7.57    0.47
   6   9  -1    7.49    0.47
  -9   6  -1    7.97    0.52
   9  -6  -1    8.38    0.53
   6   9   1    7.85    0.48
  -6  -9   1    8.77    0.45
  -9   6   1    7.71    0.50
  -6  -9   1    8.03    0.50
  -9   6   1    7.46    0.48
   9  -6   1    7.76    0.51
   9  -6   1    7.64    0.48
   9  -6   1    8.48    0.54
   6   9   1    8.08    0.50
  -7  -9  -1   27.73    1.12
   7   9  -1   25.25    1.14
  -7  -9  -1   26.05    1.15
   7   9  -1   24.54    1.17
   9  -7  -1   26.20    1.19
  -9   7  -1   28.75    1.17
  -7  -9  -1   27.88    1.19
  -9   7  -1   27.99    1.19
   9  -7  -1   27.92    1.20
   9  -7  -1   27.04    1.17
   7   9  -1   25.97    1.09
  -7  -9   1   27.36    1.10
   9  -7   1   27.43    1.17
   7   9   1   28.33    1.17
   9  -7   1   25.41    1.19
   7   9   1   27.63    1.18
   7   9   1   26.50    1.12
  -9   7   1   25.89    1.15
  -7  -9   1   27.30    1.18
   9  -7   1   26.72    1.18
  -7  -9   1   28.14    1.16
  -9   7   1   25.39    1.17
   8   9  -1    2.04    0.31
  -8  -9  -1    1.85    0.26
   9  -8  -1    2.21    0.29
   9  -8  -1    2.09    0.31
  -9   8  -1    1.85    0.28
  -9   8  -1    1.66    0.26
   9  -8  -1    2.03    0.33
  -8  -9  -1    1.85    0.27
   8   9  -1    2.21    0.28
   8   9  -1    2.41    0.27
  -8  -9  -1    1.69    0.25
   8   9   1    1.92    0.27
  -8  -9   1    2.17    0.29
   9  -8   1    1.84    0.27
   8   9   1    1.69    0.25
   9  -8   1    2.19    0.29
   8   9   1    1.98    0.25
  -8  -9   1    2.29    0.31
   9  -8   1    1.99    0.30
  -9   8   1    1.88    0.28
  -9   8   1    1.90    0.26
  -8  -9   1    1.85    0.26
   9  -9  -1   -0.38    0.18
   9   9  -1    0.08    0.21
   9   9  -1   -0.29    0.16
  -9  -9  -1    0.12    0.17
  -9  -9  -1   -0.32    0.15
  -9   9  -1   -0.43    0.18
  -9  -9  -1   -0.27    0.18
  -9   9  -1   -0.41    0.19
   9  -9  -1   -0.35    0.20
   9   9  -1    0.12    0.15
   9  -9  -1   -0.15    0.21
   9   9   1   -0.22    0.16
   9  -9   1   -0.05    0.21
   9   9   1   -0.01    0.18
  -9   9   1   -0.33    0.17
   9   9   1   -0.30    0.18
   9  -9   1   -0.42    0.21
  -9  -9   1   -0.17    0.19
  -9  -9   1   -0.07    0.17
  -9   9   1   -0.38    0.17
  10   9  -1    3.74    0.43
  -9  10  -1    3.64    0.40
 -10  -9  -1    3.71    0.37
  10   9  -1    3.42    0.39
   9 -10  -1    3.12    0.44
   9 -10  -1    3.10    0.40
   9 -10  -1    3.34    0.44
 -10  -9  -1    3.67    0.43
  -9  10  -1    3.06    0.40
 -10  -9  -1    3.22    0.43
  10   9  -1    3.78    0.39
  10   9   1    3.32    0.37
   9 -10   1    3.48    0.40
   9 -10   1    3.68    0.43
  -9  10   1    2.90    0.39
 -10  -9   1    2.89    0.39
 -10  -9   1    2.44    0.36
   9 -10   1    3.90    0.40
  10   9   1    3.10    0.36
  10   9   1    2.90    0.36
 -10  -9   1    3.51    0.40
  -9  10   1    3.63    0.42
  -8  10  -1    5.03    0.47
 -10  -8  -1    4.83    0.44
  10   8  -1    5.41    0.41
 -10  -8  -1    4.64    0.44
   8 -10  -1    4.79    0.44
 -10  -8  -1    4.66    0.42
   8 -10  -1    5.17    0.46
  10   8  -1    4.30    0.42
  10   8  -1    4.97    0.46
  -8  10  -1    5.15    0.45
 -10  -8   1    4.81    0.43
  10   8   1    5.22    0.45
   8 -10   1    5.11    0.43
 -10  -8   1    6.02    0.45
  10   8   1    5.33    0.42
  -8  10   1    4.59    0.44
  10   8   1    5.48    0.44
 -10  -8   1    5.31    0.41
  -8  10   1    4.46    0.42
   8 -10   1    5.18    0.49
  -8  10   1    4.91    0.46
   8 -10   1    4.93    0.47
  -7  10  -1    4.71    0.42
 -10  -7  -1    4.35    0.38
 -10  -7  -1    4.77    0.42
  10   7  -1    5.04    0.38
   7 -10  -1    4.40    0.42
   7 -10  -1    4.37    0.44
  -7  10  -1    4.09    0.43
  10   7  -1    4.73    0.39
 -10  -7  -1    4.42    0.41
  10   7  -1    4.45    0.43
   7 -10   1    4.89    0.46
  -7  10   1    3.76    0.40
  -7  10   1    4.18    0.41
 -10  -7   1    3.69    0.39
 -10  -7   1    4.73    0.40
   7 -10   1    3.73    0.42
  10   7   1    4.15    0.38
  -7  10   1    4.98    0.41
  10   7   1    4.34    0.41
   7 -10   1    4.63    0.39
  10   7   1    4.32    0.38
 -10  -7   1    4.73    0.40
   6 -10  -1    1.04    0.24
   6 -10  -1    1.21    0.25
  10   6  -1    1.58    0.25
  -6  10  -1    1.54    0.28
  10   6  -1    1.27    0.24
  10   6  -1    1.58    0.25
  -6  10  -1    1.15    0.23
 -10  -6  -1    1.58    0.25
 -10  -6  -1    2.12    0.30
 -10  -6  -1    1.55    0.25
  -6  10   1    1.92    0.29
  10   6   1    1.24    0.22
   6 -10   1    1.57    0.26
 -10  -6   1    1.02    0.24
  -6  10   1    2.08    0.30
  10   6   1    1.33    0.24
 -10  -6   1    1.27    0.23
  10   6   1    1.20    0.23
 -10  -6   1    1.08    0.25
   6 -10   1    1.84    0.29
  -6  10   1    1.85    0.26
  -5  10  -1   11.35    0.60
 -10  -5  -1   11.42    0.63
  -5  10  -1   11.60    0.65
 -10  -5  -1   11.79    0.62
  10   5  -1   11.09    0.61
   5 -10  -1   11.77    0.63
   5 -10  -1   12.13    0.67
  10   5  -1   12.84    0.61
  10   5  -1   12.22    0.64
 -10  -5  -1   12.65    0.65
  -5  10  -1   11.38    0.63
   5 -10   1   12.33    0.62
  -5  10   1   12.16    0.62
 -10  -5   1   11.48    0.63
  -5  10   1   12.72    0.67
 -10  -5   1   11.35    0.60
   5 -10   1   11.74    0.67
  10   5   1   11.75    0.61
  10   5   1   11.44    0.63
  -5  10   1   12.64    0.64
 -10  -5   1   11.76    0.64
  10   5   1   10.71    0.61
  -4  10  -1    1.46    0.26
  10   4  -1    1.21    0.24
   4 -10  -1    1.82    0.26
  10   4  -1    1.54    0.22
   4 -10  -1    1.42    0.26
  -4  10  -1    1.41    0.24
 -10  -4  -1    1.34    0.23
 -10  -4  -1    1.12    0.21
  10   4  -1    1.39    0.23
 -10  -4  -1    1.29    0.24
  -4  10  -1    1.73    0.23
   4 -10   1    1.51    0.24
  -4  10   1    1.28    0.22
   4 -10   1    1.36    0.25
 -10  -4   1    1.76    0.26
  10   4   1    1.80    0.26
 -10  -4   1    2.00    0.25
  10   4   1    1.48    0.24
  -4  10   1    1.11    0.21
 -10  -4   1    1.48    0.23
  10   4   1    1.85    0.26
  -4  10   1    1.46    0.26
   3 -10  -1    0.25    0.17
 -10  -3  -1    0.36    0.18
 -10  -3  -1    0.22    0.17
 -10  -3  -1    0.18    0.17
  -3  10  -1    0.68    0.18
  10   3  -1    0.26    0.18
  -3  10  -1    0.13    0.18
  10   3  -1    0.15    0.17
   3 -10  -1    0.49    0.21
  -3  10  -1    0.14    0.20
  10   3  -1    0.26    0.15
   3 -10   1    0.19    0.17
 -10  -3   1    0.56    0.19
 -10  -3   1    0.31    0.19
  10   3   1    0.24    0.18
 -10  -3   1    0.52    0.18
  10   3   1    0.17    0.16
   3 -10   1    0.04    0.16
  -3  10   1    0.56    0.17
  10   3   1    0.81    0.19
  -3  10   1    0.12    0.15
  -3  10   1    0.15    0.17
  10   2  -1    6.96    0.45
   2 -10  -1    6.35    0.47
 -10  -2  -1    7.34    0.45
  -2  10  -1    6.20    0.48
  -2  10  -1    6.84    0.40
 -10  -2  -1    7.95    0.49
  10   2  -1    7.99    0.46
   2 -10  -1    6.56    0.44
  10   2  -1    7.33    0.46
 -10  -2  -1    7.71    0.46
  -2  10  -1    6.14    0.44
 -10  -2   1    6.54    0.48
  10   2   1    5.86    0.43
   2 -10   1    8.24    0.48
  -2  10   1    7.73    0.49
 -10  -2   1    6.02    0.44
 -10  -2   1    6.11    0.43
  10   2   1    6.95    0.44
  10   2   1    6.31    0.44
  -2  10   1    7.90    0.44
   2 -10   1    7.13    0.45
  -2  10   1    7.39    0.44
 -10  -1  -1   33.23    1.37
 -10  -1  -1   32.23    1.36
 -10  -1  -1   33.44    1.37
  10   1  -1   33.62    1.35
  10   1  -1   32.49    1.37
  -1  10  -1   33.09    1.36
  10   1  -1   32.68    1.37
   1 -10  -1   33.32    1.36
  -1  10  -1   33.46    1.31
   1 -10  -1   32.81    1.39
  -1  10  -1   32.67    1.39
   1 -10   1   32.73    1.38
  10   1   1   33.60    1.38
   1 -10   1   33.53    1.36
 -10  -1   1   33.11    1.37
  -1  10   1   32.34    1.35
  -1  10   1   32.39    1.33
  10   1   1   33.53    1.37
  10   1   1   34.71    1.36
 -10  -1   1   34.07    1.36
 -10  -1   1   34.48    1.37
  -1  10   1   32.05    1.39
  10   0  -1    7.25    0.46
   0 -10  -1    7.04    0.41
 -10   0  -1    6.73    0.47
   0 -10  -1    7.51    0.48
   0  10  -1    7.28    0.38
  10   0  -1    6.57    0.46
   0 -10  -1    7.38    0.45
 -10   0  -1    6.97    0.46
   0  10  -1    6.50    0.43
  10   0  -1    7.03    0.46
 -10   0  -1    7.27    0.46
   0  10  -1    6.94    0.46
  10   0   1    7.49    0.47
 -10   0   1    7.07    0.49
   0  10   1    6.87    0.41
   0 -10   1    6.61    0.43
   0 -10   1    7.26    0.47
   0  10   1    7.33    0.47
  10   0   1    7.23    0.46
 -10   0   1    7.25    0.44
 -10   0   1    6.43    0.44
  10   0   1    7.29    0.46
   1  10  -1   32.47    1.40
   1  10  -1   32.49    1.29
 -10   1  -1   33.56    1.38
  -1 -10  -1   32.39    1.39
 -10   1  -1   34.41    1.39
  -1 -10  -1   33.36    1.32
  10  -1  -1   33.33    1.37
  10  -1  -1   34.93    1.40
   1  10  -1   32.24    1.36
  10  -1  -1   33.42    1.37
  -1 -10  -1   34.18    1.37
 -10   1  -1   32.40    1.37
  10  -1   1   32.91    1.39
  10  -1   1   33.53    1.37
 -10   1   1   34.19    1.38
  -1 -10   1   32.93    1.38
   1  10   1   34.66    1.36
   1  10   1   33.28    1.33
  10  -1   1   32.99    1.37
 -10   1   1   32.24    1.38
  -1 -10   1   34.66    1.36
 -10   1   1   32.85    1.37
   1  10   1   34.02    1.40
  10  -2  -1    6.83    0.47
  -2 -10  -1    7.99    0.45
 -10   2  -1    7.29    0.47
   2  10  -1    7.75    0.49
 -10   2  -1    6.39    0.50
  -2 -10  -1    8.15    0.49
  10  -2  -1    6.82    0.46
  10  -2  -1    6.67    0.47
  -2 -10  -1    7.00    0.40
  -2 -10  -1    8.30    0.45
 -10   2  -1    7.02    0.46
   2  10  -1    8.29    0.46
   2  10   1    7.38    0.48
  10  -2   1    7.75    0.50
  -2 -10   1    6.79    0.40
 -10   2   1    8.10    0.47
  -2 -10   1    6.90    0.43
 -10   2   1    7.73    0.46
  10  -2   1    8.21    0.49
  -2 -10   1    7.22    0.47
   2  10   1    6.95    0.44
  10  -2   1    7.88    0.46
  -2 -10   1    6.87    0.36
 -10   3  -1    0.65    0.19
  -3 -10  -1    0.25    0.19
  -3 -10  -1    0.16    0.15
  10  -3  -1    0.75    0.20
 -10   3  -1    0.69    0.22
  10  -3  -1    0.27    0.17
 -10   3  -1    0.62    0.18
   3  10  -1    0.27    0.18
  -3 -10  -1    0.39    0.16
   3  10  -1    0.34    0.16
  10  -3  -1    0.12    0.18
  -3 -10  -1    0.42    0.16
  10  -3   1    0.40    0.18
  10  -3   1    0.41    0.18
  -3 -10   1    0.79    0.18
  10  -3   1    0.37    0.20
  -3 -10   1    0.65    0.19
 -10   3   1    0.37    0.16
 -10   3   1    0.33    0.18
   3  10   1    0.59    0.19
  -3 -10   1    0.70    0.15
   3  10   1    0.46    0.16
  -3 -10   1    0.71    0.13
  -4 -10  -1    1.06    0.22
  -4 -10  -1    1.70    0.20
  10  -4  -1    1.80    0.26
  10  -4  -1    1.43    0.24
   4  10  -1    1.13    0.22
 -10   4  -1    1.45    0.23
  -4 -10  -1    1.32    0.22
 -10   4  -1    1.58    0.25
  -4 -10  -1    1.34    0.21
   4  10  -1    1.51    0.23
  10  -4  -1    1.68    0.27
  10  -4   1    1.18    0.25
 -10   4   1    1.71    0.25
  10  -4   1    1.28    0.22
 -10   4   1    1.35    0.22
  10  -4   1    1.70    0.27
  -4 -10   1    1.47    0.25
  -4 -10   1    1.69    0.24
  -4 -10   1    1.53    0.19
   4  10   1    1.64    0.25
   4  10   1    1.81    0.23
  -4 -10   1    1.97    0.22
  -5 -10  -1   11.97    0.65
  -5 -10  -1   12.34    0.58
  10  -5  -1   11.29    0.63
 -10   5  -1   11.02    0.63
  10  -5  -1   12.78    0.68
  10  -5  -1   11.67    0.65
  -5 -10  -1   12.85    0.60
   5  10  -1   11.47    0.61
 -10   5  -1   11.16    0.62
   5  10  -1   11.82    0.65
  -5 -10  -1   11.80    0.62
 -10   5   1   11.87    0.64
  -5 -10   1   11.47    0.60
   5  10   1   11.35    0.64
 -10   5   1   12.47    0.62
  10  -5   1   12.04    0.66
  -5 -10   1   11.14    0.63
  -5 -10   1   12.21    0.57
  10  -5   1   11.90    0.63
  10  -5   1   13.17    0.68
  -5 -10   1   11.71    0.53
   5  10   1   12.04    0.62
  -6 -10  -1    1.85    0.25
  10  -6  -1    1.11    0.24
 -10   6  -1    1.23    0.26
  10  -6  -1    1.32    0.25
 -10   6  -1    1.28    0.24
   6  10  -1    1.51    0.26
  -6 -10  -1    1.58    0.27
  10  -6  -1    1.33    0.26
   6  10  -1    1.28    0.22
  -6 -10  -1    1.90    0.23
  10  -6   1    2.16    0.29
  -6 -10   1    1.40    0.18
  -6 -10   1    1.54    0.23
   6  10   1    1.07    0.24
  -6 -10   1    1.41    0.26
  10  -6   1    1.85    0.26
  -6 -10   1    1.59    0.23
 -10   6   1    1.61    0.25
  10  -6   1    1.94    0.31
   6  10   1    1.13    0.21
 -10   6   1    1.76    0.27
 -10   7  -1    4.37    0.41
 -10   7  -1    4.33    0.40
  -7 -10  -1    4.79    0.41
   7  10  -1    4.76    0.43
  -7 -10  -1    4.23    0.38
   7  10  -1    4.35    0.38
  -7 -10  -1    4.84    0.39
  10  -7  -1    4.24    0.40
  10  -7  -1    3.97    0.42
  10  -7  -1    4.64    0.43
  10  -7   1    4.35    0.39
   7  10   1    4.82    0.39
 -10   7   1    4.40    0.39
  10  -7   1    4.92    0.43
  10  -7   1    4.08    0.43
   7  10   1    4.53    0.40
  -7 -10   1    4.39    0.37
  -7 -10   1    4.33    0.37
 -10   7   1    4.25    0.40
  -7 -10   1    5.05    0.43
 -10   8  -1    5.28    0.44
  10  -8  -1    5.54    0.47
  10  -8  -1    4.63    0.49
  -8 -10  -1    4.47    0.42
   8  10  -1    4.72    0.47
  -8 -10  -1    5.52    0.46
  -8 -10  -1    4.50    0.40
  10  -8  -1    5.84    0.46
   8  10  -1    4.77    0.42
 -10   8  -1    5.10    0.46
   8  10  -1    5.08    0.40
  10  -8   1    5.09    0.45
  -8 -10   1    5.48    0.45
  10  -8   1    4.98    0.42
  10  -8   1    4.87    0.49
   8  10   1    5.17    0.46
   8  10   1    5.40    0.42
 -10   8   1    4.62    0.44
  -8 -10   1    5.24    0.42
 -10   8   1    5.18    0.43
   8  10   1    6.19    0.44
  -8 -10   1    5.23    0.43
  10  -9  -1    3.27    0.42
  -9 -10  -1    3.24    0.41
  10  -9  -1    3.03    0.41
   9  10  -1    3.94    0.40
  10  -9  -1    2.75    0.38
 -10   9  -1    3.32    0.40
  -9 -10  -1    3.46    0.41
   9  10  -1    3.34    0.37
  -9 -10  -1    3.24    0.37
   9  10  -1    4.64    0.46
 -10   9  -1    2.78    0.39
 -10   9   1    3.63    0.41
  -9 -10   1    2.88    0.39
  -9 -10   1    2.91    0.36
  10  -9   1    3.16    0.38
   9  10   1    2.61    0.36
  10  -9   1    4.04    0.48
   9  10   1    3.34    0.38
  -9 -10   1    3.03    0.40
  10  -9   1    4.06    0.44
   9  10   1    3.10    0.41
 -10   9   1    4.22    0.43
  10  10  -1   -0.39    0.20
 -10 -10  -1   -0.38    0.16
 -10  10  -1    0.07    0.21
 -10 -10  -1   -0.36    0.21
  10 -10  -1   -0.10    0.21
 -10  10  -1   -0.28    0.18
 -10 -10  -1    0.03    0.21
  10  10  -1    0.07    0.20
  10 -10  -1   -0.29    0.20
  10  10  -1    0.01    0.20
  10 -10   1    0.07    0.22
 -10  10   1   -0.27    0.20
  10  10   1   -0.12    0.20
 -10 -10   1   -0.23    0.20
  10  10   1   -0.20    0.18
  10 -10   1   -0.44    0.23
  10 -10   1    0.37    0.23
 -10 -10   1    0.36    0.23
  10  10   1   -0.30    0.20
 -10  11  -1    3.28    0.41
  10 -11  -1    3.11    0.43
 -11 -10  -1    2.59    0.39
  11  10  -1    2.80    0.38
  11  10  -1    2.95    0.35
 -10  11  -1    3.57    0.43
 -11 -10  -1    2.49    0.36
 -11 -10  -1    3.92    0.43
  10 -11  -1    3.42    0.47
  10 -11  -1    2.59    0.39
  11  10   1    3.05    0.38
 -10  11   1    2.56    0.35
 -10  11   1    2.56    0.39
  10 -11   1    2.27    0.33
  10 -11   1    2.66    0.38
 -10  11   1    3.14    0.45
 -11 -10   1    2.37    0.32
  11  10   1    3.44    0.39
 -11 -10   1    2.66    0.36
  11  10   1    3.81    0.45
 -11 -10   1    3.17    0.43
  10 -11   1    2.63    0.43
  -9  11  -1    5.65    0.48
 -11  -9  -1    5.07    0.42
   9 -11  -1    5.76    0.50
  -9  11  -1    5.89    0.49
  11   9  -1    6.09    0.47
 -11  -9  -1    5.81    0.52
   9 -11  -1    4.66    0.48
  11   9  -1    6.32    0.46
  11   9  -1    5.69    0.52
 -11  -9  -1    6.19    0.48
  -9  11   1    5.89    0.49
   9 -11   1    5.80    0.55
  11   9   1    5.36    0.49
  -9  11   1    5.95    0.53
   9 -11   1    5.93    0.46
 -11  -9   1    5.54    0.51
  11   9   1    4.73    0.42
 -11  -9   1    5.66    0.50
   9 -11   1    5.99    0.51
  -9  11   1    5.42    0.50
  11   9   1    5.34    0.49
 -11  -8  -1    9.14    0.62
  11   8  -1    9.12    0.56
  -8  11  -1    9.47    0.60
  11   8  -1    9.24    0.58
   8 -11  -1   10.28    0.65
 -11  -8  -1    9.28    0.60
 -11  -8   1    9.82    0.59
   8 -11   1    8.96    0.63
  11   8   1   10.58    0.61
 -11  -8   1   10.63    0.62
  11   8   1    9.62    0.58
  -8  11   1    9.18    0.61
 -11  -8   1    9.49    0.58
  -8  11   1    9.10    0.62
  -8  11   1    9.29    0.60
  11   8   1    9.90    0.63
   8 -11   1    9.88    0.60
   8 -11   1    8.72    0.65
  11   7  -1    7.43    0.53
  11   7  -1    6.65    0.48
   7 -11  -1    7.31    0.54
  -7  11  -1    7.21    0.50
 -11  -7  -1    6.37    0.52
   7 -11  -1    6.95    0.51
 -11  -7  -1    6.59    0.48
  -7  11  -1    6.40    0.53
  11   7  -1    6.90    0.49
 -11  -7  -1    6.65    0.51
 -11  -7   1    6.86    0.50
  -7  11   1    7.25    0.53
  11   7   1    6.99    0.49
  11   7   1    7.23    0.53
   7 -11   1    6.87    0.54
 -11  -7   1    7.07    0.53
  -7  11   1    7.35    0.51
   7 -11   1    6.76    0.50
  11   7   1    7.08    0.50
 -11  -7   1    7.28    0.51
  -7  11   1    7.03    0.54
  11   6  -1   15.41    0.75
 -11  -6  -1   15.82    0.79
  -6  11  -1   14.74    0.77
  -6  11  -1   14.99    0.76
  11   6  -1   15.27    0.78
   6 -11  -1   14.71    0.81
   6 -11  -1   15.55    0.78
 -11  -6  -1   15.16    0.78
 -11  -6  -1   14.81    0.75
  11   6  -1   15.63    0.79
  -6  11  -1   14.98    0.81
 -11  -6   1   14.83    0.74
   6 -11   1   14.65    0.80
  -6  11   1   14.50    0.78
  11   6   1   14.47    0.75
  -6  11   1   14.77    0.75
  11   6   1   15.31    0.77
  -6  11   1   15.00    0.78
   6 -11   1   16.18    0.76
 -11  -6   1   14.98    0.77
  11   6   1   14.16    0.76
 -11  -6   1   14.44    0.77
 -11  -5  -1    1.94    0.26
  11   5  -1    1.61    0.26
 -11  -5  -1    1.72    0.28
   5 -11  -1    2.13    0.33
  -5  11  -1    2.54    0.31
  -5  11  -1    2.07    0.33
 -11  -5  -1    1.94    0.29
   5 -11  -1    2.27    0.30
  11   5  -1    1.90    0.26
  -5  11  -1    2.17    0.29
  11   5  -1    1.88    0.27
  -5  11   1    1.78    0.26
  -5  11   1    2.01    0.29
  -5  11   1    2.53    0.31
  11   5   1    1.87    0.27
   5 -11   1    1.71    0.29
   5 -11   1    2.01    0.29
 -11  -5   1    2.30    0.31
 -11  -5   1    2.14    0.28
  11   5   1    2.59    0.32
 -11  -5   1    2.02    0.28
  11   5   1    2.66    0.34
  -4  11  -1   10.83    0.65
  11   4  -1   11.40    0.63
 -11  -4  -1   11.43    0.62
  11   4  -1   10.73    0.62
   4 -11  -1   11.83    0.67
  -4  11  -1   11.79    0.60
   4 -11  -1   12.08    0.63
 -11  -4  -1   10.60    0.62
 -11  -4  -1   11.42    0.64
  -4  11  -1   10.56    0.61
  11   4  -1   12.43    0.62
   4 -11   1   10.96    0.62
  -4  11   1   11.86    0.62
  -4  11   1   10.50    0.65
  11   4   1   11.00    0.63
  -4  11   1   11.60    0.61
 -11  -4   1   11.74    0.61
  11   4   1   12.59    0.63
  11   4   1   10.55    0.61
   4 -11   1   10.99    0.65
 -11  -4   1   11.47    0.62
 -11  -4   1   11.42    0.64
  -3  11  -1    7.70    0.54
  11   3  -1    6.85    0.49
 -11  -3  -1    6.74    0.50
 -11  -3  -1    7.46    0.50
  -3  11  -1    8.05    0.50
  -3  11  -1    9.23    0.47
  11   3  -1    7.18    0.51
  11   3  -1    8.60    0.50
 -11  -3  -1    7.31    0.52
   3 -11  -1    8.60    0.50
   3 -11  -1    7.53    0.54
 -11  -3   1    9.30    0.55
  11   3   1    7.68    0.51
   3 -11   1    6.83    0.48
   3 -11   1    6.80    0.53
 -11  -3   1    7.88    0.51
  11   3   1    8.99    0.50
  11   3   1    7.90    0.51
 -11  -3   1    8.05    0.50
  -3  11   1    7.87    0.48
  -3  11   1    6.92    0.52
  -3  11   1    6.60    0.48
  11   2  -1   10.37    0.57
 -11  -2  -1    9.42    0.56
  -2  11  -1    9.88    0.60
  -2  11  -1   10.02    0.51
  -2  11  -1    8.93    0.55
   2 -11  -1    9.12    0.60
 -11  -2  -1    8.91    0.56
   2 -11  -1   10.22    0.56
  11   2  -1    9.27    0.56
 -11  -2  -1   10.40    0.59
  11   2  -1    8.58    0.56
 -11  -2   1   11.26    0.61
  11   2   1   10.43    0.57
 -11  -2   1    9.70    0.56
   2 -11   1    8.96    0.54
  11   2   1    9.28    0.56
 -11  -2   1    9.22    0.55
  -2  11   1    9.30    0.59
  11   2   1    9.46    0.58
  -2  11   1    9.14    0.54
   2 -11   1    9.24    0.59
  -2  11   1   10.19    0.53
 -11  -1  -1   41.95    1.66
   1 -11  -1   38.30    1.64
 -11  -1  -1   42.61    1.67
  -1  11  -1   37.83    1.64
  11   1  -1   40.50    1.66
   1 -11  -1   40.14    1.69
  11   1  -1   41.93    1.64
 -11  -1  -1   40.80    1.66
  -1  11  -1   38.65    1.68
  -1  11  -1   38.27    1.58
  11   1  -1   43.00    1.68
   1 -11   1   42.45    1.65
  11   1   1   40.37    1.63
  -1  11   1   40.87    1.64
  11   1   1   39.78    1.65
   1 -11   1   43.26    1.69
  -1  11   1   41.10    1.62
  11   1   1   40.22    1.68
  -1  11   1   42.75    1.69
 -11  -1   1   41.37    1.65
 -11  -1   1   39.08    1.65
 -11  -1   1   41.06    1.66
  11   0  -1   27.27    1.18
   0 -11  -1   27.47    1.20
   0  11  -1   26.13    1.19
   0  11  -1   25.89    1.15
   0 -11  -1   27.07    1.11
   0  11  -1   26.93    1.08
   0 -11  -1   27.11    1.16
 -11   0  -1   26.66    1.17
  11   0  -1   26.69    1.17
 -11   0  -1   27.05    1.19
 -11   0  -1   26.96    1.17
  11   0  -1   27.30    1.17
 -11   0   1   27.25    1.20
   0  11   1   26.10    1.12
   0 -11   1   27.15    1.15
  11   0   1   26.87    1.19
 -11   0   1   27.82    1.17
  11   0   1   27.74    1.18
 -11   0   1   26.82    1.16
   0 -11   1   27.44    1.19
  11   0   1   28.62    1.17
   0  11   1   26.87    1.20
 -11   1  -1   39.61    1.67
  -1 -11  -1   44.15    1.68
  11  -1  -1   38.70    1.66
 -11   1  -1   41.19    1.68
  11  -1  -1   40.25    1.69
  -1 -11  -1   41.35    1.62
   1  11  -1   43.42    1.72
  -1 -11  -1   40.70    1.69
 -11   1  -1   40.49    1.69
  11  -1  -1   39.64    1.67
 -11   1   1   42.78    1.68
  11  -1   1   42.56    1.70
 -11   1   1   42.67    1.70
   1  11   1   39.54    1.66
  -1 -11   1   39.75    1.69
  11  -1   1   41.84    1.67
   1  11   1   40.77    1.70
  11  -1   1   43.20    1.69
  -1 -11   1   40.66    1.66
 -11   1   1   43.48    1.69
  -2 -11  -1    9.86    0.55
 -11   2  -1    9.71    0.57
  -2 -11  -1    9.87    0.56
   2  11  -1    9.73    0.60
  11  -2  -1   11.08    0.60
   2  11  -1   10.68    0.57
  11  -2  -1    9.27    0.60
 -11   2  -1   10.31    0.58
  -2 -11  -1   10.09    0.59
  -2 -11  -1    8.42    0.51
  11  -2  -1    9.70    0.58
 -11   2  -1   10.38    0.60
  11  -2   1    9.74    0.60
  -2 -11   1   10.44    0.52
  -2 -11   1   10.77    0.58
  11  -2   1    9.61    0.57
 -11   2   1    9.92    0.57
  11  -2   1    9.99    0.60
   2  11   1   10.40    0.57
   2  11   1   10.26    0.60
  -2 -11   1   10.45    0.59
 -11   2   1   10.56    0.58
  -3 -11  -1    7.92    0.49
 -11   3  -1    8.32    0.52
  11  -3  -1    8.43    0.53
 -11   3  -1    8.76    0.56
   3  11  -1    8.48    0.50
 -11   3  -1    8.53    0.52
  11  -3  -1    8.50    0.52
  -3 -11  -1    7.30    0.48
  -3 -11  -1    6.77    0.44
   3  11  -1    7.11    0.53
  -3 -11  -1    7.95    0.53
  11  -3  -1    8.39    0.55
 -11   3   1    7.51    0.50
   3  11   1    8.13    0.52
  11  -3   1    8.12    0.51
   3  11   1    8.67    0.50
 -11   3   1    7.75    0.49
  -3 -11   1    8.86    0.46
  11  -3   1    7.35    0.52
  -3 -11   1    8.77    0.49
  -3 -11   1    8.37    0.40
  -3 -11   1    9.09    0.53
  11  -3   1    8.74    0.55
   4  11  -1   11.55    0.62
 -11   4  -1   11.99    0.65
   4  11  -1   12.32    0.67
  -4 -11  -1   11.89    0.62
  11  -4  -1   12.32    0.66
 -11   4  -1   12.56    0.65
  -4 -11  -1   11.33    0.57
  11  -4  -1   11.74    0.68
  -4 -11  -1   11.49    0.65
  11  -4  -1   11.36    0.63
  -4 -11  -1   11.70    0.61
  -4 -11   1   12.24    0.62
 -11   4   1   11.94    0.63
  11  -4   1   11.41    0.65
 -11   4   1   11.81    0.64
  -4 -11   1   11.80    0.57
   4  11   1   12.01    0.66
  11  -4   1   11.70    0.63
   4  11   1   11.69    0.62
  11  -4   1   11.96    0.68
  -4 -11   1   12.23    0.65
  -4 -11   1   11.58    0.52
  11  -5  -1    2.65    0.34
  11  -5  -1    2.45    0.35
  -5 -11  -1    2.17    0.30
 -11   5  -1    2.70    0.34
  -5 -11  -1    2.26    0.25
   5  11  -1    1.98    0.28
  -5 -11  -1    1.80    0.28
  -5 -11  -1    2.09    0.26
 -11   5  -1    1.89    0.27
  11  -5  -1    2.33    0.35
   5  11  -1    2.28    0.31
   5  11   1    2.75    0.35
 -11   5   1    2.86    0.36
   5  11   1    2.23    0.29
  11  -5   1    1.83    0.26
  -5 -11   1    1.95    0.23
 -11   5   1    2.12    0.28
  -5 -11   1    2.26    0.29
  11  -5   1    2.53    0.35
  -5 -11   1    2.15    0.27
  11  -5   1    1.72    0.28
  -5 -11   1    2.35    0.33
  -6 -11  -1   15.32    0.74
   6  11  -1   15.08    0.79
 -11   6  -1   15.40    0.77
  11  -6  -1   15.72    0.84
  11  -6  -1   15.82    0.79
  -6 -11  -1   14.86    0.72
  -6 -11  -1   15.06    0.76
 -11   6  -1   15.19    0.78
  -6 -11  -1   15.64    0.80
   6  11  -1   14.62    0.76
  11  -6  -1   14.54    0.79
 -11   6   1   15.32    0.78
  11  -6   1   15.92    0.78
   6  11   1   15.92    0.77
  -6 -11   1   15.19    0.75
 -11   6   1   16.03    0.78
  -6 -11   1   15.23    0.72
  11  -6   1   14.77    0.81
   6  11   1   15.95    0.79
  11  -6   1   15.33    0.81
  -6 -11   1   14.92    0.78
  -6 -11   1   15.19    0.67
  11  -7  -1    6.94    0.51
  -7 -11  -1    7.41    0.53
 -11   7  -1    8.06    0.53
 -11   7  -1    6.65    0.51
   7  11  -1    6.88    0.52
  11  -7  -1    6.87    0.54
  11  -7  -1    7.04    0.53
  -7 -11  -1    7.13    0.49
   7  11  -1    6.83    0.49
  -7 -11  -1    6.55    0.47
  -7 -11   1    6.62    0.47
  -7 -11   1    7.18    0.43
  11  -7   1    6.92    0.54
  11  -7   1    6.66    0.54
  -7 -11   1    7.41    0.52
  11  -7   1    7.02    0.51
   7  11   1    7.03    0.51
  -7 -11   1    7.30    0.47
   7  11   1    7.61    0.50
 -11   7   1    6.53    0.49
 -11   7   1    6.81    0.51
  -8 -11  -1   10.23    0.64
  11  -8  -1   10.25    0.68
 -11   8  -1   10.53    0.62
  -8 -11  -1    9.25    0.60
   8  11  -1    9.79    0.62
  11  -8  -1    9.18    0.65
 -11   8   1    9.51    0.60
  -8 -11   1   10.42    0.63
  11  -8   1    9.86    0.61
  11  -8   1    9.51    0.65
   8  11   1   10.64    0.61
  -8 -11   1    9.96    0.59
  11  -8   1    9.17    0.62
  -8 -11   1   10.10    0.58
   8  11   1    9.61    0.63
 -11   8   1    9.81    0.63
  11  -9  -1    4.17    0.46
   9  11  -1    5.84    0.50
   9  11  -1    6.34    0.49
  -9 -11  -1    6.21    0.50
  -9 -11  -1    6.03    0.47
  11  -9  -1    5.55    0.48
   9  11  -1    5.96    0.47
  -9 -11  -1    6.09    0.45
 -11   9  -1    5.13    0.46
  11  -9  -1    5.69    0.51
 -11   9  -1    5.92    0.47
   9  11   1    5.31    0.46
   9  11   1    5.62    0.48
   9  11   1    6.25    0.49
  11  -9   1    5.81    0.54
 -11   9   1    5.78    0.47
  11  -9   1    5.56    0.45
  -9 -11   1    5.29    0.47
  -9 -11   1    5.77    0.49
 -10 -11  -1    2.80    0.36
  10  11  -1    2.39    0.31
 -11  10  -1    3.70    0.41
 -10 -11  -1    2.95    0.40
 -11  10  -1    2.60    0.36
  10  11  -1    2.89    0.39
  11 -10  -1    2.73    0.42
 -10 -11  -1    2.74    0.37
  11 -10  -1    2.66    0.39
 -10 -11   1    2.97    0.40
 -10 -11   1    3.38    0.38
  10  11   1    3.07    0.40
  11 -10   1    2.48    0.38
  10  11   1    2.31    0.35
 -10 -11   1    3.24    0.44
 -11  10   1    3.02    0.39
  11 -10   1    1.99    0.37
  10  11   1    3.22    0.44
  11 -10   1    3.14    0.40
 -11  10   1    2.69    0.35
  11  11  -1    0.06    0.22
  11  11  -1   -0.18    0.23
 -11 -11  -1   -0.15    0.20
 -11 -11  -1   -0.24    0.26
  11 -11  -1   -0.26    0.27
 -11  11  -1   -0.09    0.22
 -11 -11  -1   -0.26    0.23
  11 -11  -1   -0.01    0.25
  11 -11   1   -0.33    0.29
 -11  11   1    0.17    0.26
 -11  11   1   -0.13    0.27
  11  11   1   -0.19    0.20
  11  11   1   -0.25    0.25
  11 -11   1   -0.44    0.23
 -11 -11   1   -0.17    0.21
  11  11   1   -0.18    0.23
 -11 -11   1    0.21    0.24
 -11  11   1   -0.04    0.27
  11 -11   1   -0.11    0.22
 -11 -11   1   -0.01    0.25
 -12 -11  -1    7.77    0.59
  11 -12  -1    7.82    0.70
  12  11  -1    7.33    0.60
  11 -12  -1    6.26    0.56
 -12 -11  -1    6.54    0.63
 -11  12  -1    7.91    0.58
  12  11  -1    6.04    0.53
 -12 -11   1    7.31    0.62
  11 -12   1    7.10    0.59
  12  11   1    6.28    0.56
 -12 -11   1    7.37    0.57
 -11  12   1    7.29    0.66
  12  11   1    7.48    0.62
  11 -12   1    7.38    0.68
  12  11   1    7.09    0.62
 -11  12   1    7.87    0.66
 -12 -10  -1    6.51    0.54
  10 -12  -1    5.67    0.56
  12  10  -1    5.34    0.52
  10 -12  -1    6.05    0.64
 -10  12  -1    6.21    0.53
  12  10  -1    7.27    0.54
 -12 -10  -1    5.74    0.48
 -12 -10  -1    5.83    0.59
 -10  12   1    5.80    0.57
 -12 -10   1    6.46    0.55
 -10  12   1    6.74    0.54
  10 -12   1    5.89    0.56
  10 -12   1    5.35    0.62
 -12 -10   1    5.64    0.59
 -12 -10   1    5.67    0.53
  12  10   1    5.86    0.49
 -10  12   1    6.71    0.58
  12  10   1    5.40    0.54
  10 -12   1    5.75    0.50
  12  10   1    5.26    0.52
  -9  12  -1    1.22    0.27
   9 -12  -1    1.13    0.28
  -9  12  -1    1.18    0.30
 -12  -9  -1    1.00    0.23
 -12  -9  -1    0.86    0.23
  12   9  -1    0.50    0.23
  12   9  -1    0.74    0.28
 -12  -9  -1    0.90    0.30
  -9  12   1    1.15    0.31
  12   9   1    1.51    0.30
   9 -12   1    0.87    0.26
 -12  -9   1    1.18    0.31
  -9  12   1    0.61    0.31
  12   9   1    1.16    0.25
 -12  -9   1    0.96    0.25
  -9  12   1    0.93    0.28
 -12  -9   1    0.97    0.26
   9 -12   1    1.26    0.29
  12   9   1    0.90    0.25
   8 -12  -1    0.02    0.21
 -12  -8  -1    0.17    0.26
   8 -12  -1   -0.03    0.24
 -12  -8  -1   -0.15    0.19
  12   8  -1    0.45    0.20
  -8  12  -1   -0.01    0.20
  12   8  -1    0.31    0.21
  12   8  -1    0.25    0.23
  -8  12  -1    0.02    0.22
  -8  12  -1   -0.17    0.24
 -12  -8  -1    0.12    0.20
  -8  12   1    0.46    0.23
 -12  -8   1   -0.03    0.23
 -12  -8   1    0.28    0.18
 -12  -8   1    0.49    0.24
  12   8   1    0.01    0.19
  -8  12   1    0.18    0.23
  12   8   1    0.26    0.22
   8 -12   1    0.41    0.27
  -8  12   1    0.24    0.25
  12   8   1   -0.15    0.22
   8 -12   1   -0.19    0.28
   8 -12   1    0.17    0.20
   7 -12  -1    5.65    0.49
 -12  -7  -1    6.48    0.50
  12   7  -1    6.21    0.47
  -7  12  -1    6.32    0.50
  -7  12  -1    5.01    0.53
  -7  12  -1    5.65    0.51
   7 -12  -1    5.66    0.52
  12   7  -1    6.14    0.48
  12   7  -1    5.99    0.49
 -12  -7  -1    5.99    0.53
  -7  12   1    5.93    0.47
 -12  -7   1    5.43    0.45
  12   7   1    5.88    0.46
 -12  -7   1    5.76    0.50
 -12  -7   1    6.16    0.54
  12   7   1    5.55    0.47
   7 -12   1    5.64    0.52
  -7  12   1    6.17    0.53
  12   6  -1    2.05    0.29
 -12  -6  -1    1.43    0.24
 -12  -6  -1    1.76    0.32
   6 -12  -1    1.78    0.28
  -6  12  -1    2.53    0.32
  -6  12  -1    1.89    0.31
  12   6  -1    2.08    0.31
  12   6  -1    2.08    0.30
   6 -12  -1    1.75    0.33
 -12  -6  -1    1.59    0.29
  -6  12  -1    2.08    0.32
  12   6   1    1.89    0.30
 -12  -6   1    1.68    0.31
  -6  12   1    2.41    0.34
 -12  -6   1    2.17    0.32
  12   6   1    1.82    0.28
   6 -12   1    1.73    0.27
  12   6   1    1.75    0.28
  -6  12   1    1.84    0.28
  -6  12   1    2.01    0.33
   6 -12   1    1.90    0.33
 -12  -6   1    2.09    0.28
  -5  12  -1   10.62    0.63
   5 -12  -1    9.15    0.64
 -12  -5  -1   11.13    0.64
  -5  12  -1   10.36    0.61
 -12  -5  -1   11.41    0.62
  -5  12  -1    9.58    0.66
 -12  -5  -1   11.05    0.66
  12   5  -1   11.04    0.63
   5 -12  -1   10.82    0.63
  12   5  -1   11.30    0.63
  12   5  -1   10.10    0.62
 -12  -5   1   10.40    0.64
   5 -12   1   11.28    0.62
 -12  -5   1   10.04    0.62
  -5  12   1   10.86    0.66
  12   5   1   10.20    0.62
 -12  -5   1    9.28    0.59
  -5  12   1   11.53    0.64
   5 -12   1   10.37    0.66
  12   5   1    8.91    0.59
  12   5   1   10.34    0.63
  -5  12   1   11.81    0.62
 -12  -4  -1    4.32    0.41
  -4  12  -1    4.22    0.44
   4 -12  -1    4.61    0.41
  12   4  -1    4.48    0.42
  -4  12  -1    3.67    0.40
  12   4  -1    5.14    0.42
   4 -12  -1    4.68    0.46
  12   4  -1    4.50    0.42
  -4  12  -1    4.78    0.40
 -12  -4  -1    3.88    0.41
 -12  -4  -1    4.79    0.45
  12   4   1    4.82    0.43
 -12  -4   1    3.97    0.42
  12   4   1    3.67    0.41
  -4  12   1    4.36    0.40
 -12  -4   1    4.29    0.41
  -4  12   1    3.94    0.43
 -12  -4   1    3.71    0.46
  12   4   1    3.35    0.41
  -4  12   1    4.78    0.41
   4 -12   1    3.92    0.39
   4 -12   1    4.50    0.45
   3 -12  -1    1.85    0.28
  -3  12  -1    1.98    0.25
 -12  -3  -1    1.03    0.26
  12   3  -1    1.11    0.24
   3 -12  -1    1.53    0.30
  12   3  -1    1.13    0.24
  -3  12  -1    1.36    0.25
 -12  -3  -1    0.90    0.23
  -3  12  -1    1.48    0.28
  12   3  -1    1.92    0.29
 -12  -3  -1    0.96    0.23
 -12  -3   1    2.03    0.28
 -12  -3   1    1.94    0.31
  12   3   1    1.42    0.28
 -12  -3   1    1.87    0.31
  12   3   1    1.51    0.27
  -3  12   1    1.23    0.25
  -3  12   1    0.97    0.23
   3 -12   1    1.16    0.23
   3 -12   1    0.77    0.24
  12   3   1    1.67    0.26
  -3  12   1    1.48    0.28
   2 -12  -1    4.55    0.43
 -12  -2  -1    5.56    0.46
  -2  12  -1    5.06    0.38
   2 -12  -1    4.93    0.46
  12   2  -1    5.71    0.46
  12   2  -1    5.56    0.45
 -12  -2  -1    5.96    0.45
  12   2  -1    6.63    0.47
 -12  -2  -1    5.11    0.48
  -2  12  -1    4.19    0.41
  -2  12  -1    5.12    0.46
 -12  -2   1    5.49    0.48
  12   2   1    4.90    0.45
  12   2   1    5.13    0.44
  -2  12   1    5.59    0.41
   2 -12   1    4.93    0.48
  12   2   1    4.74    0.41
 -12  -2   1    4.48    0.42
   2 -12   1    5.48    0.42
  -2  12   1    5.35    0.47
 -12  -2   1    5.08    0.45
  -2  12   1    6.52    0.42
  12   1  -1   41.82    1.69
  12   1  -1   41.98    1.65
   1 -12  -1   40.04    1.69
   1 -12  -1   39.37    1.65
  -1  12  -1   39.30    1.59
  -1  12  -1   38.50    1.69
 -12  -1  -1   40.74    1.67
 -12  -1  -1   41.33    1.68
  12   1  -1   42.28    1.68
  -1  12  -1   37.66    1.64
 -12  -1  -1   40.05    1.67
  -1  12   1   40.47    1.63
  -1  12   1   41.08    1.70
  12   1   1   40.50    1.68
   1 -12   1   42.50    1.66
  12   1   1   41.01    1.65
   1 -12   1   39.95    1.69
  12   1   1   40.12    1.67
 -12  -1   1   40.38    1.67
 -12  -1   1   40.58    1.68
 -12  -1   1   39.96    1.66
  -1  12   1   41.56    1.66
 -12   0  -1    0.43    0.23
   0 -12  -1    0.43    0.23
  12   0  -1    0.64    0.22
   0  12  -1    0.13    0.19
 -12   0  -1    0.38    0.21
 -12   0  -1    0.31    0.22
   0  12  -1    0.48    0.23
  12   0  -1    0.38    0.22
   0 -12  -1    0.53    0.22
   0  12  -1    0.69    0.16
  12   0  -1    0.12    0.21
   0  12   1    0.42    0.19
   0  12   1    0.43    0.21
   0 -12   1    0.20    0.20
 -12   0   1    0.33    0.21
  12   0   1    0.44    0.21
 -12   0   1    0.77    0.29
  12   0   1    0.49    0.21
  12   0   1    0.56    0.25
   0 -12   1    0.30    0.22
 -12   0   1    0.59    0.22
   0  12   1    0.62    0.25
 -12   1  -1   40.87    1.69
  -1 -12  -1   42.43    1.68
  -1 -12  -1   40.44    1.71
  -1 -12  -1   39.73    1.61
  12  -1  -1   40.64    1.68
  12  -1  -1   42.05    1.71
   1  12  -1   40.85    1.72
 -12   1  -1   40.54    1.68
 -12   1  -1   40.37    1.70
  12  -1  -1   40.29    1.68
 -12   1   1   41.91    1.68
  12  -1   1   42.72    1.69
  12  -1   1   41.24    1.68
   1  12   1   40.15    1.67
 -12   1   1   42.49    1.69
   1  12   1   40.04    1.71
  -1 -12   1   41.65    1.67
 -12   1   1   37.39    1.68
  12  -1   1   41.53    1.71
  -1 -12   1   41.98    1.70
  -2 -12  -1    6.66    0.45
 -12   2  -1    5.31    0.45
  -2 -12  -1    5.98    0.49
 -12   2  -1    5.66    0.45
  12  -2  -1    4.85    0.46
  12  -2  -1    5.14    0.44
  -2 -12  -1    6.32    0.44
 -12   2  -1    5.03    0.50
   2  12  -1    6.21    0.50
   2  12  -1    6.58    0.46
  -2 -12  -1    5.50    0.40
  12  -2  -1    5.47    0.47
  -2 -12   1    5.21    0.41
 -12   2   1    6.12    0.45
  -2 -12   1    5.04    0.40
  12  -2   1    6.55    0.49
 -12   2   1    7.17    0.47
   2  12   1    5.57    0.47
  12  -2   1    6.23    0.45
  12  -2   1    6.42    0.50
   2  12   1    5.10    0.43
  -2 -12   1    5.75    0.47
   3  12  -1    1.19    0.23
  12  -3  -1    1.77    0.30
  12  -3  -1    2.20    0.30
   3  12  -1    1.33    0.30
 -12   3  -1    1.80    0.27
  -3 -12  -1    1.58    0.27
  12  -3  -1    1.72    0.26
 -12   3  -1    1.41    0.24
  -3 -12  -1    1.66    0.23
  -3 -12  -1    1.23    0.25
  -3 -12  -1    1.49    0.23
 -12   3   1    1.69    0.29
  -3 -12   1    1.38    0.23
   3  12   1    1.83    0.25
   3  12   1    1.76    0.27
  -3 -12   1    2.01    0.30
  -3 -12   1    1.72    0.25
  12  -3   1    1.54    0.24
  -3 -12   1    1.95    0.22
  12  -3   1    1.35    0.27
 -12   3   1    1.44    0.25
  12  -3   1    1.21    0.27
  12  -4  -1    4.83    0.46
  12  -4  -1    3.95    0.41
   4  12  -1    4.63    0.40
 -12   4  -1    4.05    0.40
 -12   4  -1    4.09    0.41
  12  -4  -1    4.02    0.40
  -4 -12  -1    4.08    0.43
  -4 -12  -1    4.92    0.36
  -4 -12  -1    4.42    0.40
   4  12  -1    4.16    0.44
  -4 -12  -1    5.06    0.42
 -12   4   1    4.31    0.41
   4  12   1    3.96    0.39
  -4 -12   1    4.05    0.43
   4  12   1    4.40    0.44
  -4 -12   1    4.31    0.30
  12  -4   1    4.53    0.40
 -12   4   1    5.02    0.42
  12  -4   1    6.07    0.49
  -4 -12   1    3.79    0.37
  12  -4   1    4.45    0.43
  -4 -12   1    3.84    0.35
  -5 -12  -1   10.48    0.55
   5  12  -1   10.97    0.61
  12  -5  -1    9.90    0.62
 -12   5  -1   10.62    0.62
  -5 -12  -1   11.34    0.65
  12  -5  -1   10.12    0.66
   5  12  -1   10.70    0.65
  -5 -12  -1   10.98    0.61
 -12   5  -1    9.60    0.62
  -5 -12  -1   11.11    0.59
  12  -5  -1    9.66    0.63
  -5 -12   1   10.32    0.56
  12  -5   1   11.26    0.67
  12  -5   1   11.05    0.65
  -5 -12   1   10.06    0.49
   5  12   1    9.93    0.63
  -5 -12   1    9.51    0.58
  12  -5   1   10.57    0.61
  -5 -12   1    9.24    0.62
   5  12   1    9.67    0.60
 -12   5   1   10.53    0.64
 -12   5   1   10.74    0.61
  -6 -12  -1    1.88    0.27
  12  -6  -1    2.05    0.35
  12  -6  -1    1.91    0.33
 -12   6  -1    2.07    0.31
   6  12  -1    1.72    0.31
  12  -6  -1    2.01    0.32
  -6 -12  -1    1.75    0.26
 -12   6  -1    2.08    0.29
  -6 -12  -1    1.91    0.32
  -6 -12  -1    1.86    0.26
   6  12  -1    1.67    0.28
  -6 -12   1    2.14    0.22
  -6 -12   1    1.83    0.31
 -12   6   1    1.52    0.28
  12  -6   1    1.67    0.28
   6  12   1    2.09    0.29
  -6 -12   1    1.67    0.25
  -6 -12   1    1.86    0.28
  12  -6   1    2.23    0.33
   6  12   1    1.54    0.28
 -12   6   1    1.93    0.30
  12  -6   1    1.47    0.31
   7  12  -1    5.31    0.47
  -7 -12  -1    5.93    0.45
  12  -7  -1    5.43    0.51
  -7 -12  -1    6.28    0.49
 -12   7  -1    6.18    0.48
  12  -7  -1    6.39    0.50
   7  12  -1    6.55    0.48
  -7 -12  -1    5.89    0.51
  -7 -12   1    6.06    0.40
  -7 -12   1    5.88    0.47
  12  -7   1    6.31    0.52
  -7 -12   1    6.03    0.51
   7  12   1    5.38    0.45
 -12   7   1    6.16    0.48
  -8 -12  -1   -0.05    0.15
  12  -8  -1    0.27    0.22
  -8 -12  -1   -0.14    0.24
  12  -8  -1    0.02    0.22
   8  12  -1   -0.33    0.18
 -12   8  -1    0.10    0.20
   8  12  -1    0.63    0.25
 -12   8  -1    0.25    0.22
  -8 -12  -1    0.32    0.22
  -8 -12  -1    0.20    0.24
  12  -8  -1    0.40    0.26
   8  12   1    0.08    0.18
  12  -8   1    0.43    0.25
  12  -8   1    0.40    0.21
  -8 -12   1    0.39    0.18
 -12   8   1   -0.13    0.21
   8  12   1   -0.07    0.21
  12  -8   1   -0.05    0.27
 -12   8   1   -0.10    0.21
  -8 -12   1    0.36    0.24
  -8 -12   1    0.21    0.20
  -8 -12   1    0.17    0.18
  -9 -12  -1    0.82    0.28
 -12   9  -1    0.78    0.27
  -9 -12  -1    1.18    0.27
   9  12  -1    0.99    0.25
 -12   9  -1    0.63    0.25
  12  -9  -1    1.00    0.31
  12  -9  -1    1.20    0.32
  12  -9   1    0.79    0.31
  -9 -12   1    1.18    0.28
  12  -9   1    0.44    0.28
   9  12   1    1.45    0.28
  -9 -12   1    1.01    0.24
 -12   9   1    0.70    0.26
  -9 -12   1    0.98    0.27
   9  12   1    0.95    0.26
  12  -9   1    0.72    0.26
 -12   9   1    0.87    0.26
 -10 -12  -1    6.63    0.53
  12 -10  -1    5.85    0.59
 -10 -12  -1    6.24    0.58
  10  12  -1    5.08    0.52
 -12  10  -1    5.13    0.53
  12 -10  -1    4.72    0.57
 -12  10  -1    6.24    0.53
  10  12  -1    6.50    0.54
 -10 -12  -1    6.28    0.50
 -12  10   1    6.66    0.54
 -10 -12   1    5.83    0.54
  10  12   1    6.31    0.55
  12 -10   1    6.31    0.58
  12 -10   1    5.92    0.59
  12 -10   1    6.02    0.51
 -12  10   1    5.55    0.55
 -10 -12   1    5.97    0.55
  10  12   1    5.46    0.53
 -11 -12  -1    7.41    0.59
 -11 -12  -1    6.88    0.64
  12 -11  -1    7.95    0.62
  11  12  -1    7.65    0.57
  11  12  -1    7.30    0.61
  12 -11  -1    7.41    0.69
 -12  11  -1    8.08    0.57
 -11 -12   1    7.47    0.63
  12 -11   1    7.72    0.57
  11  12   1    6.30    0.61
  11  12   1    6.73    0.63
  12 -11   1    8.00    0.67
  11  12   1    7.08    0.64
 -12  11   1    5.89    0.60
 -12  12  -1   -0.30    0.25
 -12 -12  -1    0.60    0.28
  12  12  -1   -0.19    0.28
 -12 -12  -1    0.13    0.31
  12 -12  -1    0.32    0.24
  12  12  -1    0.03    0.24
 -12 -12   1    0.08    0.27
  12  12   1   -0.32    0.22
  12 -12   1    0.20    0.38
 -12  12   1   -0.17    0.26
  12 -12   1    0.15    0.27
  12  12   1   -0.20    0.26
 -12 -12   1   -0.14    0.30
 -12  13  -1    3.07    0.45
 -13 -12  -1    3.66    0.49
 -12  13  -1    2.96    0.39
 -13 -12  -1    3.11    0.41
 -13 -12  -1    2.04    0.36
  13  12  -1    2.32    0.36
  12 -13  -1    2.40    0.40
  12 -13   1    1.65    0.33
 -12  13   1    2.87    0.41
 -13 -12   1    2.70    0.40
  12 -13   1    2.36    0.42
 -13 -12   1    3.11    0.45
  13  12   1    2.90    0.39
 -12  13   1    3.13    0.43
  13  12   1    2.69    0.41
  13  12   1    2.44    0.38
  13  11  -1    0.38    0.31
 -13 -11  -1    0.23    0.32
  11 -13  -1    0.33    0.27
 -11  13  -1    0.47    0.34
 -11  13  -1   -0.07    0.24
 -13 -11  -1    0.53    0.26
  13  11  -1    0.22    0.26
 -11  13   1    0.23    0.33
 -13 -11   1    0.24    0.32
 -13 -11   1   -0.39    0.25
  11 -13   1   -0.27    0.26
  11 -13   1    0.00    0.33
  13  11   1   -0.29    0.26
 -11  13   1    0.43    0.28
  13  11   1   -0.32    0.28
 -10  13  -1    4.49    0.46
 -13 -10  -1    3.99    0.55
  13  10  -1    4.47    0.55
 -13 -10  -1    3.44    0.47
 -10  13  -1    3.75    0.47
  10 -13  -1    4.61    0.61
  13  10  -1    3.54    0.42
  10 -13  -1    4.08    0.49
 -10  13   1    4.26    0.56
  10 -13   1    5.18    0.55
 -13 -10   1    3.71    0.46
  10 -13   1    3.56    0.52
  13  10   1    3.53    0.46
  13  10   1    3.99    0.48
 -13 -10   1    4.25    0.49
  10 -13   1    3.03    0.43
 -10  13   1    4.01    0.54
  13   9  -1    5.06    0.53
 -13  -9  -1    5.45    0.57
 -13  -9  -1    5.65    0.49
  -9  13  -1    5.32    0.57
 -13  -9   1    4.48    0.56
  -9  13   1    6.36    0.55
 -13  -9   1    4.81    0.53
   9 -13   1    5.72    0.65
 -13  -9   1    5.82    0.50
  13   9   1    5.66    0.53
  -9  13   1    5.20    0.55
  13   9   1    4.91    0.52
   9 -13   1    5.39    0.49
   9 -13   1    5.55    0.56
  -9  13   1    5.82    0.61
  -8  13  -1    1.08    0.32
  -8  13  -1    0.92    0.31
  13   8  -1    1.07    0.27
 -13  -8  -1    0.42    0.23
  13   8  -1    0.95    0.28
 -13  -8  -1    0.98    0.32
   8 -13  -1    1.27    0.29
  -8  13  -1    1.40    0.28
 -13  -8  -1    1.28    0.28
 -13  -8   1    0.86    0.27
  -8  13   1    0.86    0.27
  -8  13   1    0.64    0.29
  13   8   1    0.87    0.25
  13   8   1    1.10    0.31
  -8  13   1    0.88    0.31
   8 -13   1    1.13    0.26
   8 -13   1    0.81    0.29
 -13  -8   1    0.67    0.31
   8 -13   1    1.42    0.38
  13   8   1    0.40    0.23
 -13  -8   1    1.19    0.29
 -13  -7  -1    0.60    0.28
  13   7  -1    0.55    0.24
  13   7  -1    0.74    0.23
  -7  13  -1    0.75    0.28
   7 -13  -1    0.86    0.30
 -13  -7  -1    0.73    0.24
  -7  13  -1    0.28    0.27
   7 -13  -1    0.62    0.26
  -7  13  -1    1.18    0.26
 -13  -7  -1    0.71    0.21
  13   7  -1    1.04    0.25
  -7  13   1    0.63    0.27
 -13  -7   1    0.43    0.22
 -13  -7   1    1.26    0.28
  -7  13   1    0.91    0.23
  -7  13   1    0.49    0.27
   7 -13   1    0.39    0.27
  13   7   1    0.44    0.21
  13   7   1    0.84    0.24
   7 -13   1    0.47    0.22
 -13  -7   1    0.50    0.30
  13   7   1    0.75    0.26
  -6  13  -1    4.66    0.49
  -6  13  -1    4.39    0.49
  13   6  -1    5.43    0.49
 -13  -6  -1    5.47    0.49
  13   6  -1    4.99    0.47
   6 -13  -1    4.72    0.45
   6 -13  -1    4.22    0.48
 -13  -6  -1    5.46    0.43
 -13  -6  -1    4.76    0.52
  -6  13  -1    5.17    0.46
  13   6  -1    5.70    0.50
  -6  13   1    5.62    0.54
 -13  -6   1    5.57    0.52
  -6  13   1    5.56    0.52
  -6  13   1    5.82    0.48
  13   6   1    4.95    0.45
  13   6   1    4.80    0.46
 -13  -6   1    4.70    0.42
 -13  -6   1    4.45    0.47
   6 -13   1    5.44    0.46
  13   6   1    5.32    0.45
   6 -13   1    4.96    0.50
  -5  13  -1    2.41    0.32
 -13  -5  -1    2.33    0.34
 -13  -5  -1    2.72    0.39
  13   5  -1    3.24    0.39
   5 -13  -1    3.19    0.42
  -5  13  -1    3.11    0.38
 -13  -5  -1    3.08    0.39
  13   5  -1    2.43    0.34
  13   5  -1    3.01    0.40
  -5  13  -1    2.18    0.35
   5 -13  -1    2.85    0.37
  13   5   1    2.99    0.38
  13   5   1    2.72    0.37
 -13  -5   1    2.50    0.38
  -5  13   1    3.26    0.42
  -5  13   1    3.17    0.38
 -13  -5   1    2.42    0.31
   5 -13   1    2.92    0.41
   4 -13  -1    0.68    0.23
 -13  -4  -1    0.55    0.22
  -4  13  -1    0.47    0.21
  13   4  -1    0.46    0.22
 -13  -4  -1    0.41    0.25
  13   4  -1    0.43    0.23
  -4  13  -1    0.50    0.22
   4 -13   1    0.54    0.26
 -13  -4   1    0.43    0.22
  -4  13   1    0.53    0.21
  -4  13   1    0.00    0.22
   4 -13   1    0.20    0.18
  13   4   1    0.30    0.22
  -4  13   1    0.15    0.21
  13   4   1    0.29    0.22
 -13  -4   1    0.33    0.21
 -13  -4   1    0.11    0.24
  13   4   1    0.35    0.22
   3 -13  -1    2.66    0.37
  -3  13  -1    2.55    0.34
 -13  -3  -1    2.29    0.34
  13   3  -1    2.05    0.31
  13   3  -1    2.83    0.36
  -3  13  -1    2.60    0.37
  -3  13  -1    2.10    0.32
 -13  -3  -1    2.21    0.31
  13   3  -1    2.21    0.33
   3 -13  -1    2.48    0.33
 -13  -3  -1    2.24    0.31
  -3  13   1    1.77    0.27
  -3  13   1    2.51    0.30
   3 -13   1    1.84    0.34
  13   3   1    2.21    0.32
 -13  -3   1    2.68    0.39
  13   3   1    2.06    0.30
  13   3   1    3.03    0.37
   3 -13   1    2.57    0.35
  -3  13   1    2.71    0.36
 -13  -3   1    2.21    0.32
 -13  -3   1    2.21    0.31
  -2  13  -1   16.93    0.83
  -2  13  -1   17.09    0.88
 -13  -2  -1   16.44    0.87
  13   2  -1   16.24    0.84
  13   2  -1   17.70    0.86
   2 -13  -1   16.63    0.88
 -13  -2  -1   16.08    0.84
  13   2  -1   17.10    0.86
  -2  13  -1   17.16    0.78
   2 -13  -1   16.49    0.82
 -13  -2  -1   16.87    0.84
  13   2   1   17.72    0.85
  -2  13   1   15.71    0.81
   2 -13   1   16.98    0.82
  -2  13   1   16.17    0.81
  13   2   1   16.79    0.84
 -13  -2   1   16.64    0.88
  -2  13   1   16.11    0.87
 -13  -2   1   17.06    0.83
   2 -13   1   16.90    0.87
  13   2   1   16.84    0.85
 -13  -2   1   16.68    0.85
  -1  13  -1    8.11    0.48
  -1  13  -1    7.80    0.58
  13   1  -1    8.22    0.56
 -13  -1  -1    8.62    0.56
  -1  13  -1    8.28    0.53
   1 -13  -1    7.55    0.52
 -13  -1  -1    8.31    0.54
   1 -13  -1    7.47    0.58
  13   1  -1    9.12    0.57
  13   1  -1    8.50    0.57
 -13  -1  -1    7.86    0.58
  13   1   1    7.71    0.55
  -1  13   1    8.50    0.52
  -1  13   1    8.47    0.52
 -13  -1   1    7.91    0.61
  13   1   1    8.38    0.56
  -1  13   1    7.83    0.58
 -13  -1   1    8.00    0.55
 -13  -1   1    7.98    0.55
  13   1   1    7.63    0.54
   1 -13   1    9.39    0.59
   1 -13   1    8.29    0.54
   0 -13  -1    3.58    0.44
  13   0  -1    2.67    0.34
  13   0  -1    3.56    0.40
   0 -13  -1    3.23    0.38
 -13   0  -1    2.94    0.39
 -13   0  -1    3.37    0.43
 -13   0  -1    3.69    0.38
   0  13  -1    2.75    0.35
   0  13  -1    3.36    0.42
  13   0  -1    3.64    0.42
   0  13  -1    3.37    0.31
   0  13   1    3.57    0.43
  13   0   1    2.76    0.38
 -13   0   1    3.53    0.42
   0 -13   1    3.59    0.38
   0  13   1    2.73    0.34
  13   0   1    3.28    0.40
 -13   0   1    2.67    0.39
 -13   0   1    3.43    0.38
   0 -13   1    3.03    0.42
   0  13   1    2.98    0.39
  13   0   1    3.20    0.42
  13  -1  -1    8.39    0.57
 -13   1  -1    8.08    0.54
  -1 -13  -1    7.99    0.49
  13  -1  -1    7.69    0.55
  -1 -13  -1    8.04    0.53
   1  13  -1    8.56    0.56
  13  -1  -1    8.39    0.57
 -13   1  -1    7.72    0.59
 -13   1  -1    8.04    0.55
   1  13  -1    8.51    0.60
  -1 -13  -1    7.80    0.59
 -13   1   1    8.87    0.57
 -13   1   1    8.70    0.57
  13  -1   1    9.81    0.58
  -1 -13   1    8.12    0.58
   1  13   1    8.91    0.55
   1  13   1    8.14    0.61
  13  -1   1    7.76    0.56
  13  -1   1    8.55    0.56
  -1 -13   1    8.20    0.53
 -13   2  -1   16.37    0.85
  13  -2  -1   17.07    0.86
  -2 -13  -1   16.72    0.81
  -2 -13  -1   17.36    0.83
  13  -2  -1   17.22    0.85
   2  13  -1   16.99    0.89
   2  13  -1   16.97    0.84
 -13   2  -1   17.02    0.91
 -13   2  -1   15.96    0.83
  -2 -13  -1   17.53    0.89
  13  -2  -1   17.60    0.87
  -2 -13  -1   16.32    0.77
  13  -2   1   15.66    0.86
   2  13   1   17.78    0.90
  -2 -13   1   17.30    0.87
   2  13   1   16.95    0.83
  13  -2   1   17.11    0.85
 -13   2   1   16.45    0.83
  -2 -13   1   17.65    0.83
  -2 -13   1   16.78    0.78
 -13   2   1   17.13    0.85
  13  -2   1   17.20    0.87
  13  -3  -1    2.19    0.31
  -3 -13  -1    2.24    0.33
   3  13  -1    2.61    0.35
  13  -3  -1    1.93    0.30
 -13   3  -1    2.50    0.33
   3  13  -1    2.19    0.29
  -3 -13  -1    2.38    0.31
  -3 -13  -1    2.24    0.32
  -3 -13  -1    2.65    0.32
 -13   3  -1    1.87    0.27
  13  -3  -1    2.33    0.32
  -3 -13   1    2.46    0.28
 -13   3   1    2.38    0.32
   3  13   1    2.74    0.35
  -3 -13   1    2.64    0.34
  13  -3   1    1.66    0.30
  13  -3   1    2.13    0.33
  13  -3   1    2.63    0.33
   3  13   1    2.54    0.35
  -3 -13   1    2.43    0.31
 -13   3   1    2.86    0.38
   4  13  -1    0.46    0.21
 -13   4  -1    0.26    0.23
  13  -4  -1    0.33    0.22
  -4 -13  -1    0.16    0.21
  -4 -13  -1    0.13    0.21
  -4 -13  -1    0.39    0.19
   4  13   1    0.29    0.23
   4  13   1    0.39    0.20
  13  -4   1    0.43    0.22
 -13   4   1    0.32    0.20
 -13   4   1    0.35    0.23
  -4 -13   1    0.23    0.22
  -4 -13   1    0.43    0.20
  -4 -13   1    0.41    0.14
  -4 -13   1    0.28    0.20
  13  -4   1    0.33    0.22
  -5 -13  -1    2.40    0.34
  13  -5  -1    3.62    0.48
  13  -5  -1    3.10    0.41
 -13   5  -1    3.39    0.40
  -5 -13  -1    2.39    0.35
 -13   5  -1    2.75    0.37
  13  -5  -1    2.65    0.34
   5  13  -1    2.46    0.32
  -5 -13  -1    3.05    0.35
  -5 -13  -1    3.50    0.39
   5  13  -1    2.57    0.34
 -13   5   1    2.16    0.30
   5  13   1    2.75    0.39
  -5 -13   1    2.80    0.36
  -5 -13   1    2.83    0.28
  13  -5   1    2.88    0.39
  -5 -13   1    2.92    0.42
  13  -5   1    2.59    0.35
  13  -6  -1    4.71    0.47
   6  13  -1    6.38    0.52
  -6 -13  -1    4.70    0.41
 -13   6  -1    5.12    0.45
  13  -6  -1    4.73    0.45
 -13   6  -1    4.91    0.43
  -6 -13  -1    5.22    0.50
  -6 -13  -1    4.84    0.42
  13  -6  -1    4.29    0.51
   6  13  -1    5.44    0.47
  -6 -13  -1    5.52    0.47
  13  -6   1    4.97    0.43
   6  13   1    5.02    0.47
  -6 -13   1    4.59    0.35
   6  13   1    5.02    0.45
  -6 -13   1    4.74    0.42
  -6 -13   1    3.67    0.41
 -13   6   1    4.75    0.44
 -13   6   1    4.52    0.46
  13  -6   1    5.48    0.50
  13  -6   1    4.94    0.47
  -6 -13   1    4.76    0.47
 -13   7  -1    0.63    0.23
  -7 -13  -1    0.75    0.20
   7  13  -1    1.24    0.25
  13  -7  -1    0.81    0.27
  -7 -13  -1    0.77    0.25
  13  -7  -1    0.65    0.31
  13  -7  -1    0.80    0.25
   7  13  -1    0.64    0.25
  -7 -13  -1    0.80    0.24
 -13   7  -1    0.74    0.25
  -7 -13  -1    0.61    0.26
   7  13   1    0.84    0.25
 -13   7   1    0.52    0.26
 -13   7   1    0.63    0.24
  13  -7   1    0.91    0.27
  -7 -13   1    0.86    0.20
   7  13   1    0.69    0.24
  13  -7   1    0.95    0.28
  -7 -13   1    0.57    0.26
  -7 -13   1    0.89    0.26
  -7 -13   1    0.47    0.21
  13  -7   1    0.45    0.21
 -13   8  -1    0.65    0.26
   8  13  -1    1.48    0.29
  -8 -13  -1    0.97    0.23
  -8 -13  -1    1.10    0.27
  13  -8  -1    0.94    0.32
 -13   8  -1    0.47    0.25
  13  -8  -1    1.00    0.31
  -8 -13  -1    1.08    0.30
  -8 -13  -1    1.01    0.30
  13  -8   1    1.23    0.31
  -8 -13   1    0.89    0.24
  -8 -13   1    1.51    0.32
  13  -8   1    1.05    0.32
  -8 -13   1    1.18    0.27
 -13   8   1    1.16    0.30
   8  13   1    1.18    0.28
 -13   8   1    0.87    0.27
  13  -8   1    1.02    0.29
  -8 -13   1    1.05    0.22
   8  13   1    0.93    0.28
 -13   9  -1    5.67    0.52
  13  -9  -1    5.50    0.57
  -9 -13  -1    5.47    0.47
  -9 -13  -1    5.72    0.55
  -9 -13  -1    5.73    0.51
  -9 -13   1    5.29    0.48
   9  13   1    5.43    0.51
 -13   9   1    4.95    0.54
  -9 -13   1    5.27    0.43
  -9 -13   1    6.22    0.53
  13  -9   1    5.01    0.53
 -13   9   1    4.93    0.52
  13  -9   1    5.12    0.57
  -9 -13   1    5.87    0.55
   9  13   1    4.52    0.53
  13  -9   1    4.64    0.52
 -10 -13  -1    3.88    0.53
 -10 -13  -1    4.56    0.54
 -13  10  -1    4.23    0.49
  13 -10  -1    5.02    0.50
  10  13  -1    4.01    0.47
  13 -10   1    4.15    0.52
 -10 -13   1    3.78    0.46
 -13  10   1    3.24    0.43
 -10 -13   1    3.79    0.51
  10  13   1    4.90    0.48
  13 -10   1    3.79    0.51
  13 -11  -1    0.35    0.28
 -13  11  -1    0.02    0.26
 -11 -13  -1    0.02    0.31
 -11 -13  -1    0.63    0.28
  11  13  -1    0.41    0.25
 -13  11   1    0.25    0.27
 -11 -13   1   -0.06    0.29
  11  13   1   -0.06    0.26
  13 -11   1    0.90    0.33
 -11 -13   1    0.30    0.30
 -12 -13  -1    2.44    0.38
 -12 -13  -1    3.19    0.43
  12  13  -1    2.92    0.43
  13 -12  -1    3.69    0.48
 -13  12  -1    3.05    0.43
 -13  12  -1    3.99    0.54
 -12 -13  -1    2.74    0.44
  12  13  -1    3.01    0.40
  13 -12   1    3.25    0.47
  12  13   1    2.26    0.38
  12  13   1    3.21    0.44
 -13  12   1    2.98    0.47
  12  13   1    4.35    0.51
 -13  12   1    3.73    0.53
 -12 -13   1    2.90    0.40
 -12 -13   1    3.41    0.47
 -13 -13  -1    0.21    0.29
  13 -13  -1    0.05    0.27
  13  13  -1   -0.07    0.26
  13  13  -1    0.05    0.35
 -13 -13  -1    0.01    0.28
  13 -13  -1   -0.39    0.30
 -13  13  -1    0.12    0.29
 -13  13  -1   -0.47    0.31
  13 -13  -1   -0.12    0.36
 -13 -13  -1   -0.29    0.36
  13  13  -1    0.17    0.30
 -13 -13   1   -0.14    0.29
  13  13   1    0.16    0.35
  13  13   1   -0.32    0.27
  13 -13   1   -0.28    0.39
  13 -13   1   -0.04    0.29
  13 -13   1   -0.28    0.30
 -13  13   1   -0.23    0.28
 -13 -13   1   -0.07    0.35
  13  13   1   -0.18    0.34
 -13  13   1   -0.11    0.32
  13 -14  -1    1.09    0.50
 -14 -13  -1   -0.16    0.32
 -13  14  -1   -0.02    0.39
  14  13  -1   -0.15    0.35
  13 -14  -1   -0.61    0.31
  14  13  -1   -0.35    0.27
  14  13  -1    0.77    0.38
  13 -14  -1    0.16    0.32
 -14 -13  -1   -0.08    0.31
 -13  14  -1    0.31    0.30
 -13  14  -1    0.05    0.42
  13 -14   1    0.30    0.38
 -14 -13   1   -0.63    0.31
 -13  14   1   -0.45    0.33
  14  13   1   -0.09    0.38
  13 -14   1   -0.13    0.49
 -13  14   1   -0.49    0.40
  14  13   1   -0.10    0.29
  14  13   1    0.07    0.41
 -14 -13   1   -0.27    0.33
  13 -14   1    0.27    0.34
 -14 -13   1   -0.41    0.38
 -13  14   1    0.41    0.40
 -14 -12  -1   -0.61    0.29
  12 -14  -1   -0.60    0.40
  12 -14  -1   -0.33    0.28
  14  12  -1    0.68    0.33
 -12  14  -1    0.06    0.39
  14  12  -1    0.28    0.37
 -14 -12  -1   -0.30    0.36
 -12  14  -1    0.57    0.28
  14  12  -1   -0.19    0.24
 -14 -12  -1    0.17    0.27
  12 -14  -1   -0.48    0.31
 -12  14  -1    0.75    0.36
  12 -14   1    0.02    0.40
 -12  14   1   -0.87    0.33
  12 -14   1    0.46    0.32
  14  12   1   -0.65    0.29
 -14 -12   1    0.23    0.33
 -14 -12   1   -0.34    0.31
 -12  14   1    0.18    0.31
 -14 -12   1    0.01    0.34
  14  12   1    0.12    0.37
  14  12   1   -0.63    0.35
  12 -14   1    0.21    0.33
 -12  14   1    0.37    0.36
 -11  14  -1   -0.33    0.27
 -11  14  -1   -0.09    0.36
 -11  14  -1    0.09    0.32
  11 -14  -1   -0.17    0.30
 -14 -11  -1    0.06    0.33
 -14 -11  -1    0.11    0.30
  14  11  -1   -0.01    0.25
  14  11  -1    0.52    0.30
 -14 -11  -1   -0.38    0.24
  14  11   1   -0.16    0.28
  11 -14   1    0.17    0.28
 -14 -11   1   -0.34    0.35
  14  11   1    0.09    0.32
 -14 -11   1    0.31    0.30
  14  11   1    0.17    0.30
 -11  14   1   -0.07    0.28
 -11  14   1    0.58    0.37
  11 -14   1    0.61    0.35
 -11  14   1    0.46    0.32
  14  10  -1    2.38    0.39
  10 -14  -1    1.40    0.34
 -14 -10  -1    1.94    0.38
 -10  14  -1    2.09    0.37
 -14 -10  -1    2.45    0.43
 -10  14  -1    1.57    0.39
  14  10  -1    2.03    0.34
 -14 -10   1    2.03    0.42
  14  10   1    1.76    0.37
 -10  14   1    2.84    0.46
  10 -14   1    2.33    0.50
  10 -14   1    1.96    0.40
 -10  14   1    2.33    0.35
 -14 -10   1    1.89    0.37
  14  10   1    2.12    0.38
  -9  14  -1   -0.25    0.32
  14   9  -1   -0.59    0.22
   9 -14  -1    0.13    0.25
 -14  -9  -1   -0.27    0.27
 -14  -9  -1   -0.17    0.29
  -9  14  -1    0.06    0.25
 -14  -9   1    0.07    0.28
  14   9   1    0.24    0.28
  -9  14   1    0.07    0.33
  14   9   1   -0.39    0.24
 -14  -9   1   -0.45    0.28
 -14  -9   1   -0.27    0.30
   9 -14   1   -0.08    0.28
  -9  14   1   -0.14    0.26
   9 -14   1    0.13    0.37
  -8  14  -1    1.18    0.32
 -14  -8  -1    0.57    0.32
 -14  -8  -1    0.24    0.23
  14   8  -1    0.64    0.32
  14   8  -1    0.45    0.25
   8 -14  -1    0.20    0.29
  -8  14   1    0.65    0.28
 -14  -8   1    0.77    0.27
  14   8   1    0.43    0.26
  14   8   1    0.35    0.29
 -14  -8   1    0.16    0.24
   8 -14   1    0.69    0.36
   8 -14   1    0.91    0.27
 -14  -8   1    0.15    0.30
  -8  14   1    0.74    0.34
  14   7  -1    4.15    0.45
   7 -14  -1    3.66    0.49
 -14  -7  -1    3.15    0.45
  14   7  -1    2.94    0.39
  -7  14  -1    4.90    0.48
 -14  -7  -1    4.81    0.50
 -14  -7  -1    3.67    0.44
  -7  14  -1    3.73    0.52
  14   7   1    4.01    0.47
   7 -14   1    3.83    0.45
  -7  14   1    3.19    0.44
 -14  -7   1    3.80    0.48
   7 -14   1    3.64    0.47
  -7  14   1    4.27    0.52
  14   7   1    4.15    0.46
 -14  -7   1    3.88    0.53
 -14  -7   1    3.44    0.43
  14   7   1    3.81    0.47
  -7  14   1    4.58    0.47
 -14  -6  -1    0.62    0.32
  -6  14  -1    1.50    0.32
  -6  14  -1    1.18    0.28
 -14  -6  -1    1.01    0.28
   6 -14  -1    1.67    0.30
  14   6  -1    1.40    0.29
 -14  -6  -1    1.02    0.26
  14   6  -1    1.15    0.32
  -6  14   1    1.28    0.32
 -14  -6   1    1.03    0.26
  -6  14   1    1.07    0.26
 -14  -6   1    1.08    0.35
   6 -14   1    1.58    0.31
  -6  14   1    1.12    0.32
  14   6   1    1.25    0.25
 -14  -6   1    1.15    0.28
  14   6   1    1.50    0.31
  14   6   1    1.69    0.32
   6 -14   1    1.59    0.30
 -14  -5  -1    1.69    0.28
  14   5  -1    1.85    0.33
  14   5  -1    1.94    0.28
   5 -14  -1    2.19    0.36
  -5  14  -1    1.65    0.32
 -14  -5  -1    1.91    0.36
  -5  14  -1    2.78    0.38
 -14  -5  -1    1.84    0.29
  -5  14  -1    1.63    0.31
   5 -14  -1    1.74    0.28
 -14  -5   1    1.87    0.31
   5 -14   1    2.05    0.29
  -5  14   1    2.09    0.35
 -14  -5   1    1.81    0.35
  14   5   1    2.07    0.32
  -5  14   1    1.72    0.30
  14   5   1    1.72    0.30
 -14  -5   1    1.68    0.28
  -5  14   1    1.99    0.31
   5 -14   1    2.15    0.36
 -14  -4  -1    1.79    0.34
  -4  14  -1    3.23    0.44
  14   4  -1    2.60    0.37
 -14  -4  -1    2.20    0.33
   4 -14  -1    2.57    0.36
  -4  14  -1    3.50    0.39
  14   4  -1    2.85    0.39
 -14  -4  -1    3.13    0.39
  -4  14  -1    2.56    0.34
  14   4  -1    2.39    0.35
   4 -14   1    2.61    0.37
  14   4   1    2.75    0.40
   4 -14   1    2.43    0.36
  -4  14   1    2.14    0.33
 -14  -4   1    2.46    0.41
  14   4   1    2.63    0.37
 -14  -4   1    2.34    0.31
  -4  14   1    2.96    0.37
  -4  14   1    2.30    0.35
 -14  -4   1    3.25    0.41
   3 -14  -1    2.04    0.33
  14   3  -1    2.53    0.35
  -3  14  -1    2.50    0.34
  -3  14  -1    2.12    0.30
 -14  -3  -1    2.12    0.31
  14   3  -1    2.09    0.30
 -14  -3  -1    2.15    0.36
  14   3  -1    1.99    0.33
   3 -14  -1    2.64    0.36
 -14  -3  -1    1.64    0.26
  -3  14  -1    1.57    0.29
   3 -14   1    2.39    0.36
  14   3   1    1.97    0.30
  -3  14   1    2.33    0.34
  -3  14   1    2.01    0.28
   3 -14   1    1.93    0.28
  -3  14   1    2.21    0.31
 -14  -3   1    1.79    0.37
 -14  -3   1    1.95    0.32
 -14  -3   1    2.26    0.32
  14   3   1    1.86    0.30
 -14  -2  -1    6.18    0.46
  -2  14  -1    4.83    0.49
  14   2  -1    5.87    0.51
 -14  -2  -1    5.23    0.51
  -2  14  -1    4.81    0.42
   2 -14  -1    5.25    0.50
  14   2  -1    5.29    0.46
  -2  14  -1    5.43    0.43
 -14  -2  -1    6.20    0.50
   2 -14  -1    4.92    0.44
  14   2  -1    5.26    0.47
  -2  14   1    5.24    0.49
   2 -14   1    5.24    0.50
  14   2   1    4.86    0.45
  -2  14   1    5.89    0.45
  14   2   1    5.66    0.48
 -14  -2   1    5.38    0.56
 -14  -2   1    5.06    0.48
  -2  14   1    5.12    0.46
   1 -14  -1    1.84    0.31
  -1  14  -1    1.78    0.31
  14   1  -1    1.33    0.26
  -1  14  -1    2.04    0.26
 -14  -1  -1    1.25    0.27
  -1  14  -1    2.20    0.29
 -14  -1  -1    1.76    0.34
  14   1  -1    1.63    0.29
  14   1  -1    2.34    0.33
   1 -14  -1    1.43    0.29
 -14  -1  -1    1.42    0.29
 -14  -1   1    2.17    0.32
  -1  14   1    2.09    0.30
  14   1   1    2.89    0.40
   1 -14   1    2.07    0.33
  14   1   1    1.44    0.26
 -14  -1   1    2.38    0.38
   0 -14  -1    2.41    0.32
  14   0  -1    3.39    0.45
  14   0  -1    2.74    0.36
  14   0  -1    2.83    0.40
   0  14  -1    3.03    0.32
 -14   0  -1    3.23    0.39
   0 -14  -1    2.90    0.38
 -14   0  -1    2.55    0.34
 -14   0  -1    3.00    0.41
   0  14  -1    3.34    0.43
 -14   0   1    3.44    0.42
 -14   0   1    3.03    0.44
  14   0   1    3.89    0.44
   0 -14   1    3.72    0.45
   0  14   1    2.99    0.38
   0  14   1    2.91    0.37
  -1 -14  -1    1.36    0.26
  14  -1  -1    2.94    0.40
  -1 -14  -1    1.64    0.32
  14  -1  -1    1.88    0.31
 -14   1  -1    1.51    0.30
   1  14  -1    1.69    0.28
   1  14  -1    1.56    0.31
 -14   1  -1    1.66    0.27
 -14   1  -1    1.96    0.34
 -14   1   1    1.87    0.31
  14  -1   1    1.74    0.29
  14  -1   1    1.82    0.31
   1  14   1    2.92    0.38
  -1 -14   1    2.01    0.32
   2  14  -1    5.10    0.45
  -2 -14  -1    5.57    0.47
  -2 -14  -1    5.67    0.42
 -14   2  -1    5.60    0.53
  14  -2  -1    4.83    0.49
  -2 -14  -1    4.67    0.44
  14  -2  -1    5.41    0.48
  -2 -14  -1    4.97    0.49
  14  -2  -1    4.81    0.45
 -14   2  -1    4.95    0.44
   2  14  -1    5.09    0.49
 -14   2  -1    5.62    0.48
  14  -2   1    5.17    0.46
  14  -2   1    5.54    0.49
  -2 -14   1    5.41    0.45
   2  14   1    5.35    0.50
  14  -2   1    5.08    0.45
 -14   2   1    4.99    0.46
  -2 -14   1    6.16    0.50
   2  14   1    5.84    0.47
  -3 -14  -1    2.81    0.34
  -3 -14  -1    1.84    0.28
  -3 -14  -1    2.13    0.27
  -3 -14  -1    2.03    0.32
  14  -3  -1    1.88    0.32
  14  -3  -1    1.37    0.26
   3  14  -1    1.99    0.35
  14  -3  -1    1.78    0.30
 -14   3  -1    1.74    0.29
   3  14  -1    2.01    0.29
 -14   3  -1    1.91    0.31
  14  -3   1    2.32    0.32
  14  -3   1    2.48    0.37
  14  -3   1    2.45    0.32
 -14   3   1    2.23    0.33
  -3 -14   1    2.00    0.27
   3  14   1    1.70    0.31
  -3 -14   1    1.74    0.28
 -14   3   1    2.77    0.37
   3  14   1    2.01    0.33
  -3 -14   1    1.99    0.33
   4  14  -1    1.78    0.32
 -14   4  -1    3.09    0.40
  -4 -14  -1    2.44    0.35
  -4 -14  -1    2.09    0.31
   4  14  -1    2.18    0.30
 -14   4  -1    2.73    0.34
  14  -4  -1    2.67    0.38
  14  -4  -1    3.09    0.42
  14  -4  -1    2.50    0.35
  -4 -14  -1    2.45    0.38
  -4 -14  -1    2.38    0.31
  14  -4   1    2.03    0.33
  -4 -14   1    2.55    0.36
  -4 -14   1    3.40    0.38
  14  -4   1    2.49    0.39
 -14   4   1    2.64    0.34
  14  -4   1    2.07    0.29
 -14   4   1    2.61    0.33
   4  14   1    3.05    0.40
   4  14   1    3.27    0.43
  -4 -14   1    2.53    0.28
  -4 -14   1    2.72    0.37
  -5 -14  -1    1.59    0.28
  -5 -14  -1    1.99    0.28
  -5 -14  -1    1.67    0.29
  -5 -14  -1    1.89    0.33
  14  -5  -1    2.42    0.35
 -14   5  -1    2.48    0.32
 -14   5  -1    2.00    0.30
   5  14  -1    1.98    0.31
  14  -5  -1    2.18    0.37
  14  -5   1    1.51    0.28
   5  14   1    1.50    0.31
  -5 -14   1    2.05    0.29
 -14   5   1    1.39    0.29
   5  14   1    1.85    0.30
 -14   5   1    1.96    0.31
  14  -5   1    1.99    0.33
  14  -5   1    1.65    0.33
  -5 -14   1    2.00    0.31
  -5 -14   1    1.93    0.21
  -5 -14   1    1.76    0.33
  -6 -14  -1    1.08    0.29
  -6 -14  -1    1.14    0.24
  -6 -14  -1    1.30    0.26
  14  -6  -1    1.58    0.34
  -6 -14  -1    0.81    0.27
 -14   6  -1    1.34    0.29
 -14   6  -1    1.47    0.28
   6  14  -1    1.09    0.27
 -14   6   1    0.71    0.27
  -6 -14   1    1.35    0.21
  14  -6   1    1.19    0.33
   6  14   1    1.69    0.32
  -6 -14   1    1.37    0.28
  14  -6   1    0.98    0.26
  -6 -14   1    1.68    0.33
  -6 -14   1    1.13    0.27
 -14   6   1    0.96    0.31
   6  14   1    1.58    0.32
 -14   7  -1    4.15    0.45
  -7 -14  -1    3.89    0.47
   7  14  -1    4.19    0.45
  -7 -14  -1    3.59    0.42
  -7 -14  -1    2.93    0.40
  -7 -14  -1    3.11    0.42
  14  -7  -1    3.99    0.52
 -14   7  -1    3.39    0.43
  -7 -14   1    4.24    0.49
   7  14   1    4.12    0.44
 -14   7   1    3.13    0.40
  -7 -14   1    4.05    0.36
 -14   7   1    3.43    0.43
  14  -7   1    4.20    0.49
  -7 -14   1    3.43    0.46
  14  -7   1    3.72    0.51
  -7 -14   1    3.77    0.45
   7  14   1    3.26    0.47
  14  -7   1    3.18    0.42
 -14   8  -1    0.28    0.26
   8  14  -1    0.54    0.23
  -8 -14  -1    0.65    0.21
  -8 -14  -1    0.63    0.29
  -8 -14  -1    0.39    0.25
  14  -8  -1    0.17    0.25
  14  -8   1    0.42    0.31
  -8 -14   1    0.29    0.22
  14  -8   1    0.20    0.25
   8  14   1    0.26    0.27
 -14   8   1    0.46    0.31
 -14   8   1    0.71    0.33
  -8 -14   1    0.52    0.29
  -8 -14   1    0.91    0.27
  -8 -14   1    0.02    0.25
  -9 -14  -1    0.15    0.27
  -9 -14  -1   -0.08    0.24
 -14   9  -1   -0.04    0.25
  -9 -14  -1   -0.02    0.29
  14  -9  -1    0.02    0.27
   9  14  -1   -0.32    0.24
   9  14   1   -0.40    0.22
 -14   9   1   -0.35    0.26
  14  -9   1    0.08    0.27
  -9 -14   1   -0.03    0.22
  -9 -14   1   -0.03    0.25
  -9 -14   1    0.25    0.27
 -10 -14  -1    2.17    0.40
 -10 -14  -1    2.10    0.36
 -10 -14  -1    2.43    0.34
  10  14  -1    2.24    0.34
 -14  10  -1    1.67    0.33
  14 -10  -1    1.72    0.36
 -10 -14   1    1.66    0.38
 -14  10   1    2.18    0.34
  14 -10   1    2.64    0.46
  10  14   1    2.26    0.35
 -10 -14   1    2.47    0.38
 -10 -14   1    2.02    0.32
 -11 -14  -1    0.04    0.36
 -14  11  -1   -0.40    0.25
  11  14  -1    0.06    0.24
 -14  11  -1   -0.08    0.31
 -11 -14  -1    0.71    0.35
 -11 -14  -1    0.19    0.30
 -11 -14  -1   -0.19    0.23
  14 -11  -1    0.38    0.32
  14 -11  -1    0.30    0.31
  11  14   1    0.47    0.29
 -11 -14   1    0.09    0.30
  11  14   1   -0.10    0.29
  14 -11   1    0.49    0.34
 -14  11   1    0.26    0.29
 -11 -14   1    0.40    0.34
  14 -11   1   -0.39    0.28
 -11 -14   1    0.38    0.29
 -14  11   1    0.17    0.28
  14 -11   1    0.64    0.29
  14 -12  -1    0.45    0.42
 -12 -14  -1    0.29    0.28
  12  14  -1   -0.52    0.30
 -14  12  -1    0.35    0.27
  14 -12  -1    0.20    0.32
 -14  12  -1    0.06    0.32
  12  14  -1    0.92    0.30
  14 -12  -1   -0.10    0.27
 -12 -14  -1    0.65    0.37
  12  14   1   -0.47    0.28
 -12 -14   1    0.64    0.32
  14 -12   1    0.31    0.32
  14 -12   1    0.64    0.33
 -14  12   1    0.16    0.34
 -14  12   1    0.12    0.34
  14 -12   1    0.00    0.39
 -14  12   1    0.69    0.32
 -12 -14   1    0.25    0.31
  12  14   1    0.07    0.33
 -12 -14   1    0.36    0.36
 -13 -14  -1   -0.02    0.43
 -13 -14  -1    0.98    0.35
  13  14  -1   -0.05    0.33
  14 -13  -1   -0.62    0.30
  13  14  -1   -0.58    0.28
  14 -13  -1    0.25    0.30
  14 -13  -1   -0.11    0.42
 -14  13  -1    0.35    0.30
 -14  13  -1    0.02    0.37
 -13 -14   1   -0.17    0.33
 -14  13   1    0.34    0.40
 -13 -14   1    0.33    0.40
 -14  13   1    0.43    0.41
 -14  13   1    0.23    0.34
  14 -13   1   -0.33    0.36
  14 -13   1   -0.06    0.44
  13  14   1   -0.26    0.29
  14 -13   1   -0.16    0.33
  13  14   1    0.18    0.39
 -13 -14   1    0.29    0.34
 -14 -14  -1   -0.31    0.31
 -14 -14  -1   -0.37    0.34
 -14  14  -1   -0.97    0.38
 -14  14  -1   -0.24    0.33
  14  14  -1   -0.56    0.39
  14 -14  -1   -0.53    0.36
  14 -14  -1   -0.21    0.32
  14  14  -1    0.17    0.29
  14 -14  -1   -0.59    0.46
 -14 -14  -1   -0.49    0.41
 -14  14  -1   -0.70    0.40
 -14 -14   1    0.15    0.36
  14 -14   1   -0.43    0.37
 -14 -14   1    0.03    0.44
  14  14   1   -0.24    0.39
  14 -14   1   -0.81    0.38
  14 -14   1   -0.48    0.49
 -14  14   1   -0.29    0.35
  14  14   1   -0.23    0.30
 -14  14   1   -0.41    0.43
 -14  14   1   -0.41    0.44
 -14 -14   1   -0.40    0.35
  15  14  -1   -0.17    0.48
 -14  15  -1   -0.37    0.44
 -14  15  -1   -1.02    0.44
  14 -15  -1    0.89    0.41
  15  14  -1    0.55    0.42
  14 -15  -1   -0.10    0.40
 -14  15  -1    0.28    0.36
  14 -15  -1   -0.37    0.58
 -15 -14  -1    0.28    0.51
 -15 -14  -1   -0.69    0.39
 -15 -14  -1   -0.05    0.36
 -14  15   1    0.16    0.47
  14 -15   1   -0.13    0.44
  14 -15   1    0.45    0.64
  15  14   1    0.24    0.40
 -15 -14   1    0.32    0.49
  14 -15   1    0.42    0.41
 -15 -14   1    0.34    0.42
 -14  15   1    0.73    0.38
  15  14   1    0.15    0.48
  15  14   1    0.54    0.50
 -14  15   1    0.47    0.47
 -13  15  -1    0.84    0.45
 -15 -13  -1    0.36    0.33
 -15 -13  -1   -0.12    0.33
 -13  15  -1    0.90    0.36
 -15 -13  -1    0.88    0.48
  15  13  -1    0.32    0.32
  15  13  -1    0.58    0.42
  13 -15  -1    0.67    0.59
  13 -15  -1    0.91    0.39
 -13  15  -1    0.13    0.46
  13 -15  -1    0.54    0.36
  15  13  -1    1.25    0.42
  13 -15   1    1.35    0.46
  13 -15   1    0.95    0.55
 -15 -13   1    0.37    0.40
 -13  15   1    1.33    0.48
 -13  15   1    0.58    0.36
  15  13   1    0.64    0.44
 -13  15   1   -0.42    0.45
  15  13   1    1.20    0.41
  13 -15   1    1.34    0.42
 -15 -13   1    0.54    0.43
  15  13   1    0.25    0.34
 -12  15  -1    0.57    0.40
 -12  15  -1    1.01    0.35
  15  12  -1   -0.41    0.29
  15  12  -1    0.16    0.34
 -15 -12  -1   -0.31    0.32
  12 -15  -1   -0.23    0.32
 -15 -12  -1    1.02    0.46
  15  12  -1    0.27    0.38
  12 -15  -1   -0.40    0.34
 -15 -12  -1   -0.17    0.33
 -12  15  -1    0.22    0.43
  12 -15  -1    0.08    0.54
  15  12   1    0.48    0.42
  12 -15   1    0.23    0.37
  15  12   1    0.66    0.42
 -12  15   1    0.67    0.44
 -15 -12   1    0.05    0.41
  15  12   1    0.06    0.32
  12 -15   1    1.02    0.40
 -15 -12   1    0.21    0.36
 -12  15   1    0.68    0.35
  12 -15   1    0.38    0.55
 -15 -12   1    0.45    0.35
 -12  15   1    0.03    0.41
  15  11  -1   -0.08    0.34
  11 -15  -1    0.05    0.43
 -15 -11  -1    0.19    0.40
 -11  15  -1    1.08    0.31
  11 -15  -1    0.09    0.34
 -15 -11  -1    0.34    0.30
 -15 -11  -1   -0.09    0.29
 -11  15  -1    0.05    0.42
  11 -15  -1    0.16    0.31
 -11  15  -1   -0.59    0.33
  15  11  -1   -0.30    0.29
  15  11  -1    0.26    0.34
 -11  15   1   -0.46    0.36
  15  11   1   -0.06    0.39
 -15 -11   1   -0.24    0.32
 -15 -11   1   -0.36    0.32
  11 -15   1    0.12    0.34
 -11  15   1    0.45    0.32
  11 -15   1    0.00    0.32
 -15 -11   1   -0.55    0.36
  15  11   1    0.18    0.34
  15  11   1   -0.51    0.28
 -11  15   1    0.16    0.41
  10 -15  -1    1.95    0.35
  15  10  -1    1.84    0.35
  15  10  -1    1.94    0.42
 -10  15  -1    2.32    0.41
 -10  15  -1    2.63    0.45
 -10  15  -1    2.51    0.39
 -15 -10  -1    1.48    0.33
 -15 -10  -1    1.73    0.39
  10 -15  -1    1.93    0.44
 -10  15   1    1.81    0.43
 -15 -10   1    2.09    0.41
 -15 -10   1    1.89    0.36
  15  10   1    2.24    0.37
  10 -15   1    2.49    0.40
 -10  15   1    1.47    0.34
 -15 -10   1    2.24    0.44
  15  10   1    2.01    0.43
  15  10   1    2.64    0.47
  10 -15   1    1.56    0.38
   9 -15  -1    0.25    0.30
  -9  15  -1    0.92    0.37
  15   9  -1    0.36    0.29
  15   9  -1    0.03    0.25
 -15  -9  -1   -0.25    0.27
  -9  15  -1   -0.01    0.27
  -9  15  -1    0.22    0.29
 -15  -9  -1   -0.09    0.33
  15   9   1    0.01    0.29
   9 -15   1    0.14    0.39
 -15  -9   1    0.25    0.35
  -9  15   1    0.40    0.37
  15   9   1   -0.62    0.25
  -9  15   1    0.13    0.27
 -15  -9   1    0.19    0.29
  15   9   1    0.27    0.28
   9 -15   1   -0.42    0.29
  15   8  -1    1.31    0.31
 -15  -8  -1    1.36    0.33
   8 -15  -1    0.95    0.33
 -15  -8  -1    1.02    0.37
  -8  15  -1    1.29    0.38
  -8  15  -1    0.98    0.31
  15   8  -1    1.54    0.33
  -8  15   1    1.73    0.41
 -15  -8   1    1.09    0.34
   8 -15   1    1.36    0.45
  15   8   1    1.16    0.33
 -15  -8   1    1.48    0.36
  15   8   1    0.67    0.33
  -8  15   1    1.53    0.33
   8 -15   1    0.91    0.35
  -7  15  -1    3.83    0.46
  -7  15  -1    4.23    0.56
 -15  -7  -1    3.40    0.47
  15   7  -1    3.62    0.47
 -15  -7  -1    3.10    0.46
   7 -15  -1    4.64    0.51
  15   7  -1    3.40    0.45
  15   7   1    3.13    0.41
  -7  15   1    3.37    0.41
  15   7   1    3.95    0.52
 -15  -7   1    4.44    0.54
  -7  15   1    4.18    0.57
 -15  -7   1    3.37    0.47
   7 -15   1    3.99    0.57
  15   6  -1    0.07    0.23
  -6  15  -1   -0.06    0.20
   6 -15  -1   -0.11    0.25
 -15  -6  -1   -0.28    0.30
  -6  15  -1   -0.24    0.28
  15   6  -1   -0.01    0.28
 -15  -6  -1   -0.10    0.21
 -15  -6   1    0.13    0.24
  -6  15   1   -0.12    0.27
  15   6   1   -0.03    0.25
 -15  -6   1    0.51    0.32
  15   6   1    0.41    0.28
  -6  15   1   -0.06    0.28
 -15  -6   1   -0.10    0.25
   6 -15   1   -0.09    0.24
 -15  -5  -1    2.46    0.39
  15   5  -1    2.47    0.41
 -15  -5  -1    2.30    0.37
 -15  -5  -1    3.38    0.42
  -5  15  -1    2.43    0.35
   5 -15   1    3.11    0.41
 -15  -5   1    2.29    0.34
  15   5   1    2.25    0.37
 -15  -5   1    3.49    0.45
  -5  15   1    3.49    0.48
  -5  15   1    2.29    0.38
 -15  -5   1    2.90    0.45
   5 -15   1    3.70    0.47
  -5  15   1    2.81    0.39
  15   5   1    2.23    0.32
  15   5   1    2.44    0.37
  -4  15  -1    3.64    0.40
 -15  -4  -1    3.89    0.43
 -15  -4  -1    4.53    0.45
  -4  15  -1    2.40    0.36
 -15  -4  -1    3.03    0.45
  15   4  -1    3.44    0.41
   4 -15  -1    3.22    0.43
  15   4  -1    3.65    0.48
 -15  -4   1    2.94    0.46
  -4  15   1    2.99    0.38
   4 -15   1    2.33    0.38
 -15  -4   1    3.64    0.46
 -15  -4   1    2.93    0.43
  15   4   1    2.63    0.39
  -4  15   1    3.54    0.48
  15   4   1    3.26    0.44
   4 -15   1    3.86    0.43
  -4  15   1    3.09    0.38
  15   4   1    2.95    0.42
  15   3  -1    0.46    0.27
  15   3  -1    0.14    0.23
 -15  -3  -1   -0.01    0.29
  -3  15  -1    0.09    0.17
  -3  15  -1    0.26    0.23
 -15  -3  -1    0.70    0.26
   3 -15  -1    0.26    0.21
 -15  -3  -1    0.31    0.23
  15   3   1    0.25    0.21
 -15  -3   1    0.08    0.23
  -3  15   1    0.13    0.19
 -15  -3   1    0.45    0.26
  15   3   1    0.31    0.24
  -3  15   1    0.59    0.27
   3 -15   1    0.45    0.25
 -15  -3   1    0.39    0.31
   3 -15   1    0.88    0.25
  15   3   1    0.02    0.24
  -3  15   1    0.35    0.25
 -15  -2  -1    0.50    0.23
  -2  15  -1    0.32    0.19
   2 -15  -1    0.39    0.24
  15   2  -1    0.19    0.24
  15   2  -1    0.88    0.27
   2 -15  -1    0.40    0.20
  -2  15  -1    0.62    0.23
 -15  -2  -1    0.75    0.32
 -15  -2  -1    0.40    0.23
  15   2   1    0.79    0.24
  -2  15   1    0.44    0.24
   2 -15   1    0.47    0.26
 -15  -2   1    0.43    0.24
 -15  -2   1    0.02    0.30
   2 -15   1    0.30    0.23
  15   2   1    0.60    0.25
  15   2   1    0.36    0.25
  -2  15   1    0.61    0.20
 -15  -2   1    0.71    0.25
  -2  15   1    0.50    0.27
 -15  -1  -1    1.66    0.30
 -15  -1  -1    1.33    0.27
  -1  15  -1    1.91    0.27
  15   1  -1    2.30    0.37
   1 -15  -1    1.44    0.30
  15   1  -1    1.58    0.31
   1 -15  -1    1.29    0.26
 -15  -1  -1    1.73    0.36
  -1  15  -1    1.17    0.24
  15   1   1    1.26    0.28
   1 -15   1    1.88    0.28
  -1  15   1    1.81    0.31
 -15  -1   1    1.13    0.29
  15   1   1    1.34    0.28
  -1  15   1    1.85    0.30
   1 -15   1    2.24    0.37
  -1  15   1    1.81    0.31
 -15  -1   1    1.41    0.35
 -15  -1   1    1.37    0.29
  15   1   1    1.65    0.31
 -15   0  -1    0.90    0.24
  15   0  -1    0.71    0.26
 -15   0  -1    0.94    0.22
   0 -15  -1    0.94    0.23
 -15   0  -1    1.65    0.35
   0 -15  -1    0.66    0.28
  15   0  -1    0.41    0.27
   0 -15   1    0.76    0.24
  15   0   1    1.25    0.29
  15   0   1    1.10    0.25
 -15   0   1    0.57    0.30
 -15   0   1    0.89    0.24
 -15   0   1    1.19    0.28
   0 -15   1    1.07    0.30
   0  15   1    0.65    0.25
   0  15   1    1.34    0.30
  15   0   1    0.98    0.26
  -1 -15  -1    1.82    0.32
  15  -1  -1    1.69    0.33
  15  -1  -1    1.91    0.33
 -15   1  -1    1.61    0.29
  -1 -15  -1    1.86    0.32
 -15   1  -1    1.47    0.31
  -1 -15  -1    2.06    0.31
   1  15  -1    1.70    0.29
 -15   1  -1    1.28    0.30
  -1 -15   1    1.49    0.31
   1  15   1    1.66    0.29
  -1 -15   1    1.95    0.29
   1  15   1    2.05    0.34
 -15   1   1    2.05    0.30
  -1 -15   1    2.29    0.32
  15  -1   1    2.20    0.32
  15  -1   1    1.38    0.29
 -15   1   1    1.92    0.31
  15  -1   1    1.45    0.29
 -15   2  -1    0.85    0.31
  -2 -15  -1    0.36    0.25
  15  -2  -1   -0.11    0.25
  -2 -15  -1    0.40    0.22
   2  15  -1    0.22    0.22
  -2 -15  -1    0.47    0.24
  15  -2  -1    0.28    0.23
 -15   2  -1    0.70    0.26
 -15   2  -1    0.66    0.25
  -2 -15   1    0.61    0.24
 -15   2   1    0.73    0.24
   2  15   1    0.03    0.21
  15  -2   1    0.42    0.26
  -2 -15   1    0.78    0.25
  15  -2   1    0.85    0.27
  15  -2   1    0.80    0.27
   2  15   1    0.27    0.26
 -15   2   1    0.31    0.26
  -2 -15   1    0.35    0.27
  15  -3  -1    0.19    0.23
  -3 -15  -1    0.74    0.21
 -15   3  -1    0.54    0.25
  -3 -15  -1    0.60    0.27
  -3 -15  -1    0.36    0.25
  15  -3  -1    0.52    0.29
 -15   3  -1    0.34    0.25
  -3 -15  -1    0.24    0.22
   3  15  -1    0.12    0.22
  -3 -15   1    0.48    0.22
  15  -3   1    0.46    0.24
   3  15   1    0.52    0.28
 -15   3   1    0.11    0.25
 -15   3   1    0.53    0.27
   3  15   1    0.45    0.24
  -3 -15   1    0.25    0.27
  15  -3   1    0.60    0.26
  -4 -15  -1    2.82    0.38
   4  15  -1    3.51    0.40
  15  -4  -1    3.25    0.44
  -4 -15  -1    3.76    0.42
  -4 -15  -1    3.07    0.39
 -15   4  -1    3.15    0.43
  -4 -15  -1    3.70    0.49
  15  -4  -1    3.79    0.46
 -15   4  -1    2.42    0.34
  15  -4   1    3.21    0.46
   4  15   1    2.48    0.38
  -4 -15   1    2.89    0.34
 -15   4   1    3.16    0.43
  -4 -15   1    3.00    0.38
 -15   4   1    2.41    0.37
  -4 -15   1    2.90    0.39
  15  -4   1    3.05    0.41
   4  15   1    3.50    0.43
 -15   5  -1    2.48    0.39
 -15   5  -1    2.53    0.37
  -5 -15  -1    2.46    0.36
  -5 -15  -1    2.75    0.39
  15  -5   1    2.01    0.32
   5  15   1    1.93    0.31
  -5 -15   1    2.52    0.33
  -5 -15   1    2.35    0.37
 -15   5   1    2.78    0.36
 -15   5   1    2.55    0.38
  15  -5   1    2.41    0.38
  -5 -15   1    2.46    0.30
  -5 -15   1    2.20    0.33
 -15   6  -1    0.04    0.24
  -6 -15  -1   -0.16    0.24
  -6 -15  -1    0.03    0.22
  15  -6  -1   -0.20    0.24
   6  15  -1   -0.13    0.22
  -6 -15   1    0.06    0.18
 -15   6   1   -0.29    0.27
  -6 -15   1   -0.15    0.23
  15  -6   1   -0.41    0.23
  -6 -15   1   -0.40    0.22
   6  15   1   -0.29    0.27
  15  -7  -1    4.98    0.57
  -7 -15  -1    3.63    0.45
  -7 -15  -1    4.34    0.48
   7  15  -1    3.60    0.45
  -7 -15  -1    3.21    0.42
 -15   7  -1    3.64    0.49
   7  15   1    3.64    0.46
  -7 -15   1    3.52    0.48
 -15   7   1    3.72    0.52
  -7 -15   1    3.53    0.36
  15  -7   1    4.17    0.52
 -15   7   1    3.25    0.47
  -7 -15   1    4.74    0.53
  -7 -15   1    4.12    0.46
 -15   8  -1    0.96    0.32
  -8 -15  -1    1.66    0.33
  -8 -15  -1    1.29    0.30
  -8 -15  -1    1.05    0.35
  15  -8  -1    1.11    0.32
   8  15  -1    1.28    0.29
  -8 -15   1    1.42    0.25
  15  -8   1    1.29    0.34
  -8 -15   1    1.34    0.35
 -15   8   1    1.23    0.32
  -8 -15   1    1.70    0.35
   8  15   1    1.70    0.33
  -9 -15  -1    0.02    0.28
  -9 -15  -1    0.08    0.21
   9  15  -1    0.51    0.26
  -9 -15  -1    0.12    0.32
  15  -9  -1    0.32    0.28
 -15   9  -1    0.06    0.26
  -9 -15  -1    0.17    0.28
 -15   9  -1    0.55    0.27
  15  -9   1   -0.22    0.28
  -9 -15   1    0.14    0.30
  15  -9   1    0.52    0.30
  -9 -15   1   -0.01    0.23
   9  15   1    0.02    0.29
 -15   9   1   -0.12    0.27
  -9 -15   1    0.31    0.33
 -15  10  -1    2.28    0.37
  15 -10  -1    1.82    0.39
 -10 -15  -1    1.84    0.41
 -10 -15  -1    1.75    0.29
  10  15  -1    1.63    0.37
 -10 -15  -1    2.51    0.39
  15 -10  -1    1.65    0.43
 -15  10  -1    2.10    0.35
 -10 -15  -1    2.57    0.39
 -10 -15   1    2.62    0.33
 -10 -15   1    2.76    0.41
  15 -10   1    2.83    0.48
  10  15   1    2.87    0.39
  15 -10   1    1.99    0.36
 -15  10   1    1.85    0.43
 -15  10   1    2.43    0.38
  15 -10   1    1.24    0.38
 -10 -15   1    1.55    0.36
  10  15   1    2.68    0.40
 -10 -15   1    1.96    0.42
  15 -11  -1   -0.19    0.41
  11  15  -1    0.08    0.33
 -15  11  -1    0.06    0.35
  11  15  -1    0.15    0.28
  15 -11  -1   -0.03    0.34
  15 -11  -1    0.72    0.30
 -11 -15  -1   -0.16    0.32
 -15  11  -1    0.21    0.28
 -11 -15  -1    0.70    0.29
 -11 -15  -1    0.22    0.26
 -11 -15  -1    0.00    0.36
 -15  11   1    0.04    0.34
 -15  11   1    0.26    0.29
  11  15   1    0.43    0.36
  11  15   1    0.67    0.29
 -11 -15   1    0.04    0.28
 -11 -15   1    0.07    0.29
  15 -11   1    0.43    0.35
 -11 -15   1    0.26    0.35
  15 -11   1    1.14    0.40
 -11 -15   1    0.28    0.32
  15 -11   1    0.86    0.42
 -12 -15  -1    0.38    0.34
 -12 -15  -1    0.29    0.39
 -15  12  -1    0.07    0.37
  12  15  -1    0.93    0.30
  15 -12  -1    1.07    0.35
 -12 -15  -1    0.32    0.31
 -15  12  -1    0.38    0.30
  15 -12  -1   -0.03    0.42
  15 -12  -1    1.50    0.36
  12  15  -1    0.27    0.36
 -12 -15  -1    0.60    0.37
 -12 -15   1    0.13    0.31
  15 -12   1    0.36    0.45
 -12 -15   1    0.32    0.32
  12  15   1    0.60    0.39
 -15  12   1    0.13    0.39
 -15  12   1    0.70    0.36
  15 -12   1    0.57    0.36
  12  15   1   -0.24    0.30
  15 -12   1    1.41    0.39
 -15  12   1    0.00    0.39
 -12 -15   1    0.80    0.40
  13  15  -1    0.64    0.33
  15 -13  -1    0.24    0.48
 -13 -15  -1    0.24    0.33
 -13 -15  -1    0.54    0.47
 -13 -15  -1    0.98    0.47
 -15  13  -1    1.23    0.36
  15 -13  -1    1.31    0.36
 -15  13  -1    0.09    0.39
  13  15  -1    0.30    0.38
  15 -13  -1    0.64    0.35
  15 -13   1    0.30    0.53
 -13 -15   1    0.49    0.45
 -15  13   1    0.42    0.44
  15 -13   1    0.48    0.42
  15 -13   1    1.87    0.41
  13  15   1    0.77    0.33
 -15  13   1    0.55    0.37
 -13 -15   1    1.09    0.40
  13  15   1    1.11    0.44
 -15  13   1    0.35    0.43
 -13 -15   1    0.80    0.41
 -13 -15   1    0.42    0.37
  15 -14  -1    0.15    0.38
  15 -14  -1   -0.99    0.47
 -15  14  -1   -0.11    0.33
 -14 -15  -1    0.84    0.37
 -15  14  -1    0.19    0.48
  14  15  -1    1.04    0.41
 -14 -15  -1    0.10    0.48
  15 -14  -1   -0.57    0.38
  14  15  -1   -0.57    0.32
 -15  14  -1   -0.30    0.43
 -14 -15  -1   -0.05    0.34
  15 -14   1   -0.58    0.56
  14  15   1   -0.22    0.46
  15 -14   1    1.23    0.47
  15 -14   1   -0.14    0.43
 -14 -15   1   -0.61    0.40
 -14 -15   1    0.82    0.41
 -15  14   1    0.11    0.46
  14  15   1   -0.89    0.35
 -15  14   1    0.02    0.45
 -15  14   1    0.63    0.39
  13 -16  -1    0.38    0.61
  16  13  -1    0.23    0.50
 -13  16  -1    0.24    0.48
 -16 -13  -1   -0.43    0.39
 -13  16  -1    1.26    0.39
 -16 -13  -1   -0.04    0.51
  16  13  -1    0.15    0.44
  16  13  -1    0.12    0.36
  13 -16  -1    0.09    0.39
  13 -16  -1   -0.06    0.40
 -16 -13  -1    0.21    0.38
  13 -16   1    0.11    0.43
  16  13   1    0.69    0.42
  13 -16   1    0.29    0.56
  16  13   1    0.53    0.47
 -13  16   1   -0.36    0.51
 -16 -13   1    0.50    0.45
  13 -16   1   -0.11    0.44
  16  13   1    0.15    0.50
 -16 -13   1   -0.50    0.49
 -13  16   1    0.15    0.39
 -13  16   1   -1.06    0.49
 -16 -13   1    0.34    0.43
 -12  16  -1    0.64    0.35
 -12  16  -1    0.69    0.45
  16  12  -1    1.24    0.49
  12 -16  -1    0.19    0.63
 -16 -12  -1    0.63    0.48
 -16 -12  -1    0.06    0.35
  12 -16  -1   -0.76    0.32
  16  12  -1    0.11    0.40
  12 -16  -1    0.57    0.38
 -16 -12  -1    0.74    0.37
 -12  16  -1    0.75    0.43
  16  12   1   -0.32    0.41
 -12  16   1   -0.29    0.37
 -12  16   1   -0.36    0.47
 -16 -12   1    0.40    0.41
 -12  16   1    0.21    0.48
  12 -16   1    0.06    0.56
 -16 -12   1   -0.30    0.41
 -16 -12   1   -0.20    0.43
  12 -16   1    0.61    0.42
  12 -16   1   -0.50    0.39
  16  12   1   -0.11    0.46
  16  12   1   -0.30    0.31
 -16 -11  -1    1.49    0.46
 -11  16  -1    0.89    0.42
  11 -16  -1    1.10    0.38
  16  11  -1    1.56    0.43
  16  11  -1    0.58    0.32
 -16 -11  -1    1.37    0.39
  11 -16  -1    1.11    0.55
  11 -16  -1    0.91    0.37
 -11  16  -1    1.55    0.36
 -11  16  -1    1.86    0.50
 -16 -11  -1    1.02    0.33
  16  11  -1    0.61    0.42
  11 -16   1    1.13    0.42
 -11  16   1    0.87    0.45
 -16 -11   1    1.84    0.50
  16  11   1    0.74    0.32
  11 -16   1    1.42    0.57
 -16 -11   1    1.22    0.39
 -16 -11   1    0.47    0.40
 -11  16   1    1.03    0.45
  16  11   1    0.53    0.38
  11 -16   1    0.61    0.37
 -11  16   1    1.07    0.35
  16  11   1    1.11    0.42
  10 -16  -1    0.17    0.32
 -10  16  -1    0.65    0.32
  16  10  -1    0.40    0.40
  16  10  -1    0.27    0.29
  10 -16  -1    0.55    0.48
 -16 -10  -1    1.13    0.35
 -10  16  -1    0.88    0.38
 -16 -10  -1    0.24    0.43
  16  10  -1    0.54    0.36
  10 -16  -1    0.89    0.36
 -16 -10  -1    0.50    0.31
 -10  16   1    0.36    0.32
  16  10   1    1.28    0.41
 -16 -10   1    0.14    0.33
 -16 -10   1    0.46    0.32
  10 -16   1    0.24    0.37
  10 -16   1    0.51    0.37
  16  10   1    0.91    0.39
 -10  16   1    0.56    0.41
  16  10   1    0.45    0.32
 -10  16   1    0.48    0.45
 -16  -9  -1    4.10    0.57
  -9  16  -1    5.51    0.57
  16   9  -1    5.61    0.64
 -16  -9  -1    5.68    0.58
 -16  -9  -1    5.91    0.60
  16   9  -1    5.43    0.54
   9 -16  -1    5.30    0.63
  -9  16  -1    4.84    0.69
  -9  16  -1    3.92    0.53
   9 -16  -1    5.00    0.56
  16   9   1    4.88    0.67
 -16  -9   1    6.09    0.61
  -9  16   1    6.19    0.71
  -9  16   1    6.14    0.58
   9 -16   1    4.99    0.63
  -9  16   1    5.68    0.73
 -16  -9   1    3.88    0.56
  16   9   1    5.26    0.65
   9 -16   1    3.98    0.55
  16   9   1    3.96    0.56
 -16  -9   1    4.62    0.64
   8 -16  -1    4.94    0.63
 -16  -8  -1    5.03    0.70
 -16  -8  -1    5.28    0.55
  -8  16  -1    5.63    0.65
  16   8  -1    6.61    0.65
  -8  16  -1    5.49    0.68
  16   8  -1    6.46    0.61
 -16  -8  -1    4.61    0.58
  -8  16  -1    5.39    0.57
   8 -16   1    5.13    0.64
  16   8   1    4.53    0.58
   8 -16   1    6.03    0.59
  16   8   1    5.27    0.59
 -16  -8   1    5.75    0.74
 -16  -8   1    5.87    0.59
  -8  16   1    5.23    0.69
  16   8   1    5.90    0.64
  -8  16   1    5.33    0.57
  -8  16   1    5.92    0.67
   8 -16   1    5.63    0.66
  16   7  -1    1.79    0.33
   7 -16  -1    2.26    0.41
 -16  -7  -1    1.48    0.36
  -7  16  -1    2.64    0.39
  16   7  -1    2.49    0.42
  -7  16  -1    1.02    0.34
  -7  16  -1    2.21    0.43
   7 -16   1    1.95    0.40
  -7  16   1    1.54    0.37
  -7  16   1    1.61    0.42
 -16  -7   1    2.43    0.44
  16   7   1    1.98    0.39
 -16  -7   1    2.23    0.39
  16   7   1    2.36    0.41
  -6  16  -1    1.94    0.38
  -6  16  -1    1.54    0.35
 -16  -6  -1    1.18    0.35
  16   6  -1    1.39    0.36
  16   6  -1    1.32    0.33
   6 -16  -1    2.21    0.40
   6 -16   1    1.74    0.37
  -6  16   1    1.75    0.39
  -6  16   1    0.85    0.29
 -16  -6   1    1.62    0.36
 -16  -6   1    2.27    0.47
  16   6   1    1.15    0.38
  16   6   1    2.03    0.40
   5 -16  -1   14.93    0.86
  -5  16  -1   12.62    0.80
  16   5  -1   13.60    0.83
  16   5  -1   14.38    0.87
  -5  16  -1   14.93    0.80
 -16  -5  -1   14.99    0.84
  -5  16   1   13.93    0.79
 -16  -5   1   14.81    0.86
 -16  -5   1   13.80    0.93
  16   5   1   13.64    0.86
  -5  16   1   14.55    0.86
   5 -16   1   13.89    0.87
  16   5   1   12.87    0.84
  16   4  -1    0.41    0.27
 -16  -4  -1    0.89    0.38
   4 -16  -1    0.24    0.27
 -16  -4  -1    1.00    0.30
  -4  16  -1    0.96    0.25
  -4  16  -1    0.80    0.28
  16   4  -1    0.41    0.27
  16   4   1    0.70    0.32
 -16  -4   1    0.52    0.29
 -16  -4   1    0.85    0.38
   4 -16   1    0.38    0.30
  -4  16   1    0.84    0.31
  16   4   1    0.62    0.28
  -4  16   1    0.12    0.21
   3 -16  -1    1.50    0.33
  -3  16  -1    1.49    0.28
  16   3  -1    1.74    0.31
 -16  -3  -1    1.31    0.41
  -3  16  -1    1.49    0.31
 -16  -3  -1    1.49    0.33
  16   3  -1    1.69    0.35
  -3  16   1    1.60    0.38
  -3  16   1    2.07    0.34
 -16  -3   1    1.97    0.44
  16   3   1    1.38    0.33
  16   3   1    1.44    0.31
 -16  -3   1    1.02    0.31
   3 -16   1    1.86    0.30
  16   3   1    1.48    0.34
  16   2  -1    0.63    0.30
 -16  -2  -1    0.62    0.30
 -16  -2  -1    0.49    0.26
  -2  16  -1    0.18    0.24
  16   2  -1    0.64    0.26
  -2  16  -1    0.28    0.22
  16   2   1    0.11    0.26
 -16  -2   1    0.43    0.33
  -2  16   1    0.49    0.29
  -2  16   1    0.63    0.30
 -16  -2   1    0.06    0.25
   2 -16   1    0.42    0.23
 -16  -2   1    0.23    0.24
  16   2   1    0.39    0.23
 -16  -1  -1    1.10    0.39
  16   1  -1    1.62    0.34
  -1  16  -1    1.70    0.27
 -16  -1  -1    2.15    0.33
  16   1   1    2.12    0.34
   1 -16   1    2.01    0.38
 -16  -1   1    1.70    0.32
  -1  16   1    1.87    0.33
  16   1   1    1.29    0.26
 -16  -1   1    1.23    0.31
 -16  -1   1    1.59    0.39
   1 -16   1    1.58    0.28
  -1  16   1    1.80    0.34
  16   0  -1    0.01    0.24
 -16   0  -1    0.08    0.20
   0  16   1    0.31    0.26
   0 -16   1    0.16    0.26
  16   0   1    0.04    0.24
 -16   0   1   -0.15    0.26
   0 -16   1    0.10    0.21
  16   0   1    0.13    0.23
 -16   0   1   -0.27    0.24
  16  -1  -1    1.43    0.32
 -16   1  -1    1.12    0.26
  -1 -16  -1    1.88    0.33
  16  -1   1    1.78    0.31
  16  -1   1    1.40    0.31
  -1 -16   1    1.64    0.29
  -1 -16   1    1.46    0.30
 -16   1   1    1.54    0.31
 -16   1   1    1.71    0.31
  -1 -16   1    1.24    0.34
   1  16   1    2.06    0.36
 -16   2  -1    0.12    0.25
  16  -2  -1   -0.04    0.25
  16  -2  -1    0.66    0.27
  -2 -16  -1    0.67    0.28
   2  16  -1    0.49    0.23
  16  -2   1    0.68    0.26
 -16   2   1    0.77    0.28
 -16   2   1    0.56    0.27
  -2 -16   1    0.36    0.24
   2  16   1    0.64    0.28
  16  -2   1    0.41    0.25
  -2 -16   1    0.38    0.21
  16  -3  -1    1.63    0.30
  -3 -16  -1    1.86    0.35
 -16   3  -1    1.91    0.34
  -3 -16  -1    1.69    0.34
  16  -3  -1    1.24    0.33
   3  16  -1    1.52    0.30
  -3 -16   1    1.61    0.34
 -16   3   1    1.44    0.35
  -3 -16   1    1.58    0.28
  16  -3   1    2.03    0.36
   3  16   1    1.44    0.36
   4  16  -1    0.71    0.24
 -16   4  -1    0.07    0.25
  -4 -16  -1    0.66    0.25
  -4 -16  -1    0.38    0.29
  16  -4  -1    0.69    0.30
  16  -4  -1   -0.20    0.23
  -4 -16  -1    0.55    0.28
  -4 -16   1    0.64    0.26
 -16   4   1    0.19    0.30
  16  -4   1    1.28    0.33
  -4 -16   1    0.68    0.29
   4  16   1    0.65    0.25
 -16   5  -1   12.51    0.80
  16  -5  -1   14.50    0.87
  -5 -16  -1   15.63    0.89
   5  16  -1   15.66    0.81
  -5 -16  -1   14.02    0.75
  -5 -16  -1   13.72    0.81
   5  16   1   14.34    0.83
  -5 -16   1   13.76    0.87
  16  -5   1   14.30    0.86
 -16   5   1   14.24    0.82
  -5 -16   1   13.84    0.77
  -6 -16  -1    1.46    0.36
   6  16  -1    1.89    0.32
  -6 -16  -1    1.52    0.30
  16  -6  -1    1.73    0.37
  -6 -16  -1    1.91    0.37
 -16   6  -1    1.44    0.31
 -16   6   1    1.79    0.36
  16  -6   1    1.28    0.37
  -6 -16   1    1.57    0.34
  -6 -16   1    1.87    0.23
   6  16   1    2.19    0.35
  -6 -16   1    1.59    0.35
  -7 -16  -1    1.91    0.38
  -7 -16  -1    1.53    0.40
   7  16  -1    2.17    0.35
  16  -7  -1    1.88    0.37
 -16   7  -1    1.86    0.35
  -7 -16  -1    1.90    0.33
  -7 -16   1    2.16    0.26
  16  -7   1    1.41    0.37
   7  16   1    2.53    0.37
  -7 -16   1    2.54    0.42
  -7 -16   1    2.47    0.40
 -16   7   1    2.47    0.39
 -16   8  -1    5.99    0.58
  -8 -16  -1    6.30    0.59
  -8 -16  -1    5.72    0.53
  -8 -16  -1    5.15    0.54
  -8 -16  -1    4.78    0.64
  16  -8  -1    6.65    0.61
   8  16  -1    5.79    0.54
 -16   8  -1    4.79    0.55
   8  16   1    5.39    0.62
  -8 -16   1    5.49    0.45
   8  16   1    6.26    0.61
  16  -8   1    5.87    0.67
 -16   8   1    6.12    0.58
  16  -8   1    5.57    0.61
  16  -8   1    6.55    0.57
  -8 -16   1    6.15    0.66
  -8 -16   1    6.05    0.62
 -16   9  -1    5.28    0.57
  -9 -16  -1    5.02    0.56
 -16   9  -1    4.91    0.65
   9  16  -1    6.76    0.60
  -9 -16  -1    3.69    0.51
  16  -9  -1    5.87    0.64
  -9 -16  -1    6.21    0.66
  16  -9  -1    3.74    0.50
  -9 -16  -1    6.27    0.62
   9  16   1    5.48    0.59
  -9 -16   1    4.65    0.60
 -16   9   1    5.74    0.61
 -16   9   1    6.47    0.70
  -9 -16   1    5.12    0.46
  16  -9   1    4.50    0.59
  16  -9   1    5.04    0.66
  -9 -16   1    5.71    0.64
   9  16   1    4.75    0.63
  -9 -16   1    5.97    0.62
  16  -9   1    5.68    0.68
 -16  10  -1   -0.18    0.33
  10  16  -1    0.24    0.28
  10  16  -1    0.54    0.33
 -10 -16  -1    0.72    0.35
  16 -10  -1    0.50    0.40
 -10 -16  -1    0.39    0.31
  16 -10  -1   -0.34    0.30
 -10 -16  -1    0.84    0.30
 -16  10  -1   -0.03    0.29
  16 -10  -1    0.52    0.30
 -10 -16  -1    0.18    0.33
  16 -10   1    0.07    0.33
  16 -10   1    0.64    0.42
 -10 -16   1    0.11    0.25
 -16  10   1    0.14    0.33
 -10 -16   1   -0.11    0.32
  16 -10   1   -0.41    0.33
 -16  10   1    0.41    0.41
 -10 -16   1    0.72    0.34
  10  16   1    0.98    0.33
  10  16   1    0.80    0.37
 -10 -16   1    0.09    0.37
 -16  11  -1    1.94    0.39
  11  16  -1    1.03    0.37
 -11 -16  -1    1.71    0.40
 -11 -16  -1    1.02    0.42
 -11 -16  -1    1.14    0.31
  11  16  -1    1.47    0.35
  16 -11  -1    0.70    0.39
 -11 -16  -1    1.64    0.39
  16 -11  -1    0.68    0.43
 -16  11  -1    0.73    0.37
  16 -11  -1    0.50    0.35
  16 -11   1    1.60    0.50
 -16  11   1    1.18    0.43
 -11 -16   1    0.93    0.43
 -11 -16   1    1.12    0.32
  16 -11   1    1.98    0.46
 -11 -16   1    1.20    0.36
 -11 -16   1    1.41    0.43
  11  16   1    1.39    0.39
  16 -11   1    1.00    0.37
 -16  11   1    2.20    0.41
  11  16   1    1.11    0.43
 -12 -16  -1    0.72    0.33
  16 -12  -1    1.37    0.44
  16 -12  -1   -0.98    0.44
 -12 -16  -1    0.57    0.37
  16 -12  -1    0.77    0.36
 -16  12  -1    0.78    0.36
 -16  12  -1    0.28    0.42
  12  16  -1   -0.01    0.39
 -12 -16  -1    0.39    0.40
  12  16  -1    0.33    0.32
 -16  12   1    0.31    0.38
 -12 -16   1    0.30    0.34
 -12 -16   1    1.19    0.42
 -12 -16   1    0.21    0.42
  16 -12   1    0.45    0.43
  12  16   1    0.51    0.43
 -16  12   1   -0.14    0.46
 -12 -16   1    0.55    0.39
  16 -12   1    0.81    0.53
 -16  12   1    0.76    0.42
  16 -12   1    0.26    0.39
  12  16   1   -0.21    0.34
 -16  13  -1    0.38    0.35
  16 -13  -1    1.12    0.39
 -13 -16  -1    0.39    0.45
 -16  13  -1   -0.98    0.43
 -13 -16  -1    0.46    0.46
  16 -13  -1    0.33    0.57
 -13 -16  -1    0.90    0.37
  13  16  -1   -0.31    0.42
  13  16  -1   -0.63    0.34
 -13 -16  -1    1.21    0.40
  16 -13  -1    0.64    0.39
  13  16   1   -0.26    0.47
 -16  13   1   -0.23    0.46
 -13 -16   1    0.14    0.39
 -16  13   1    0.26    0.45
 -16  13   1    0.40    0.38
 -13 -16   1   -0.45    0.48
  16 -13   1    0.10    0.53
  16 -13   1   -0.56    0.42
  13  16   1    0.54    0.37
  16 -13   1   -0.12    0.43
 -13 -16   1   -0.04    0.42
 -13 -16   1    0.00    0.39
  17  12  -1    0.53    0.44
 -17 -12  -1    0.83    0.42
  12 -17  -1    0.78    0.40
  17  12  -1    0.25    0.37
  12 -17  -1    0.50    0.44
 -17 -12  -1   -0.45    0.42
 -12  17  -1    1.28    0.40
 -12  17  -1    1.27    0.50
  12 -17   1    1.76    0.48
  17  12   1    0.41    0.42
 -17 -12   1    0.67    0.42
  17  12   1    0.93    0.53
 -12  17   1    0.53    0.55
  12 -17   1    1.10    0.50
 -12  17   1    0.26    0.41
 -17 -12   1    1.26    0.45
 -11  17  -1    0.20    0.46
  11 -17  -1    0.11    0.58
 -11  17  -1   -0.67    0.33
  17  11  -1   -0.05    0.48
  11 -17  -1    0.19    0.39
  17  11  -1   -0.72    0.34
  17  11  -1    0.62    0.45
 -11  17  -1    0.03    0.46
  11 -17  -1    0.23    0.42
 -17 -11  -1   -0.46    0.38
 -17 -11  -1   -0.11    0.35
 -17 -11  -1   -0.49    0.47
 -17 -11   1    0.30    0.48
 -11  17   1    0.70    0.50
  11 -17   1    0.40    0.60
 -17 -11   1   -0.89    0.40
  17  11   1    0.06    0.45
 -11  17   1    0.28    0.38
 -11  17   1   -0.32    0.44
 -17 -11   1   -1.00    0.39
  17  11   1   -0.18    0.42
  11 -17   1    0.29    0.37
  17  11   1   -0.11    0.36
  11 -17   1   -0.03    0.40
 -17 -10  -1    0.30    0.46
  17  10  -1    0.96    0.46
 -17 -10  -1    0.43    0.34
 -10  17  -1    1.30    0.33
  10 -17  -1    0.95    0.37
 -10  17  -1    1.55    0.50
  17  10  -1    0.93    0.36
  17  10  -1    0.19    0.32
 -17 -10  -1    1.66    0.37
  10 -17  -1    1.75    0.43
  10 -17  -1    1.74    0.61
 -10  17  -1    1.72    0.49
 -17 -10   1    0.59    0.50
  10 -17   1    0.71    0.42
 -10  17   1    1.52    0.50
 -17 -10   1    1.83    0.43
 -10  17   1    1.27    0.49
 -10  17   1    1.48    0.37
  10 -17   1    1.04    0.64
  17  10   1    1.23    0.35
  10 -17   1    0.85    0.43
 -17 -10   1    1.50    0.43
  17  10   1    1.08    0.44
  17  10   1    1.54    0.47
  17   9  -1    0.26    0.40
 -17  -9  -1   -0.24    0.42
  -9  17  -1    0.29    0.43
 -17  -9  -1   -0.02    0.33
  17   9  -1   -0.33    0.30
 -17  -9  -1   -0.27    0.32
  -9  17  -1    0.35    0.38
  -9  17  -1    0.55    0.32
   9 -17  -1    0.24    0.31
  17   9  -1    0.30    0.36
   9 -17  -1   -0.63    0.35
   9 -17   1    0.57    0.40
  -9  17   1    0.94    0.43
 -17  -9   1    0.22    0.33
   9 -17   1    0.26    0.37
  17   9   1    0.18    0.42
  -9  17   1    0.14    0.42
  -9  17   1    0.29    0.32
 -17  -9   1    0.60    0.48
  17   9   1    0.68    0.39
 -17  -9   1   -0.01    0.34
  17   9   1   -0.23    0.33
  17   8  -1    0.99    0.36
 -17  -8  -1    1.20    0.33
 -17  -8  -1    1.40    0.34
  -8  17  -1    1.27    0.36
 -17  -8  -1    1.26    0.43
   8 -17  -1    1.42    0.38
  17   8  -1    0.86    0.32
  17   8  -1    1.41    0.38
   8 -17  -1    1.24    0.35
  -8  17  -1    0.69    0.40
  -8  17  -1    1.11    0.34
  17   8   1    1.04    0.34
 -17  -8   1    1.36    0.39
  17   8   1    1.29    0.40
  -8  17   1    0.66    0.36
  17   8   1    1.29    0.40
 -17  -8   1    1.42    0.39
   8 -17   1    1.99    0.42
 -17  -8   1    1.30    0.45
   8 -17   1    1.26    0.37
  -8  17   1    1.05    0.44
  -8  17   1    0.82    0.41
  17   7  -1    1.36    0.30
 -17  -7  -1    0.84    0.43
  17   7  -1    0.81    0.30
  -7  17  -1    1.44    0.40
   7 -17  -1    1.72    0.40
  -7  17  -1    1.51    0.43
 -17  -7  -1    1.13    0.37
  -7  17  -1    1.92    0.36
 -17  -7  -1    0.99    0.33
  17   7  -1    1.10    0.40
   7 -17  -1    1.41    0.36
   7 -17   1    0.51    0.35
  -7  17   1    1.08    0.41
  -7  17   1    0.92    0.31
 -17  -7   1    1.02    0.35
  17   7   1    1.25    0.38
   7 -17   1    1.14    0.36
  17   7   1    0.59    0.34
 -17  -7   1    1.73    0.36
 -17  -7   1    1.30    0.48
  17   7   1    1.21    0.38
  -7  17   1    0.79    0.41
 -17  -6  -1    5.04    0.60
  -6  17  -1    5.60    0.65
  17   6  -1    5.61    0.58
  -6  17  -1    4.95    0.61
  -6  17  -1    6.25    0.55
   6 -17  -1    5.23    0.62
  17   6  -1    5.88    0.64
 -17  -6  -1    5.02    0.58
 -17  -6  -1    5.81    0.73
   6 -17  -1    5.88    0.56
  -6  17   1    5.14    0.67
  17   6   1    6.86    0.68
 -17  -6   1    6.27    0.74
  -6  17   1    5.73    0.69
  17   6   1    3.83    0.51
   6 -17   1    4.76    0.57
 -17  -6   1    4.99    0.58
 -17  -6   1    4.11    0.58
   6 -17   1    6.57    0.65
  -6  17   1    4.26    0.52
  17   6   1    5.27    0.60
   5 -17  -1    0.15    0.25
  -5  17  -1    1.07    0.35
 -17  -5  -1    0.82    0.32
  17   5  -1    0.56    0.36
   5 -17  -1    0.51    0.31
  17   5  -1    0.04    0.30
 -17  -5  -1    0.48    0.32
  -5  17  -1    0.76    0.28
  -5  17  -1    0.24    0.33
 -17  -5  -1    0.32    0.39
  17   5   1    0.38    0.32
 -17  -5   1    0.41    0.33
 -17  -5   1    1.07    0.41
  17   5   1    0.20    0.31
  -5  17   1    0.20    0.25
  -5  17   1   -0.14    0.31
   5 -17   1    0.82    0.34
   5 -17   1    0.74    0.28
  -5  17   1    0.60    0.37
  17   5   1    0.39    0.34
  -4  17  -1    5.69    0.59
  -4  17  -1    4.40    0.48
  17   4  -1    4.81    0.65
  17   4  -1    5.40    0.57
   4 -17  -1    4.28    0.62
 -17  -4  -1    6.00    0.73
 -17  -4  -1    5.46    0.60
 -17  -4   1    4.80    0.61
  -4  17   1    5.06    0.55
  17   4   1    5.74    0.64
 -17  -4   1    3.64    0.47
  -4  17   1    6.20    0.63
  17   4   1    4.70    0.59
   4 -17   1    5.41    0.64
  17   3  -1    1.63    0.37
   3 -17  -1    1.80    0.41
 -17  -3  -1    1.63    0.36
 -17  -3  -1    1.71    0.46
  -3  17  -1    0.99    0.32
  17   3  -1    1.58    0.36
  -3  17  -1    2.32    0.37
   3 -17   1    1.93    0.38
  -3  17   1    1.00    0.30
 -17  -3   1    2.21    0.39
  -3  17   1    1.71    0.40
 -17  -3   1    2.02    0.48
  17   3   1    1.85    0.38
  17   3   1    1.41    0.37
 -17  -2  -1    8.70    0.69
  17   2  -1   10.51    0.77
  17   2  -1   10.38    0.72
   2 -17  -1   10.82    0.73
  -2  17  -1    9.44    0.65
  -2  17  -1   10.10    0.66
 -17  -2  -1    9.87    0.83
 -17  -2   1    9.86    0.70
   2 -17   1   11.57    0.80
  -2  17   1    9.73    0.70
  17   2   1   11.13    0.73
 -17  -2   1   10.08    0.82
  17   2   1   11.17    0.82
  -2  17   1   10.72    0.72
 -17  -1  -1   -0.61    0.27
  17   1  -1    0.27    0.31
  17   1  -1    0.03    0.30
  -1  17  -1    0.53    0.26
 -17  -1  -1   -0.24    0.32
   1 -17  -1   -0.19    0.28
  -1  17   1    0.05    0.28
  -1  17   1   -0.06    0.27
  17   1   1    0.28    0.30
  17   1   1    0.49    0.37
 -17  -1   1    0.06    0.28
 -17  -1   1   -0.08    0.32
   1 -17   1    0.21    0.33
  17   0  -1    1.75    0.36
 -17   0  -1    1.59    0.36
  17   0  -1    2.16    0.42
   0 -17  -1    1.23    0.35
 -17   0  -1    2.59    0.46
   0  17  -1    1.44    0.32
  17   0   1    2.25    0.41
   0  17   1    1.84    0.34
  17   0   1    1.94    0.36
   0 -17   1    2.22    0.42
 -17   0   1    1.54    0.36
  -1 -17  -1    0.38    0.31
   1  17  -1    0.15    0.26
  17  -1  -1    0.17    0.30
  17  -1  -1    0.55    0.30
 -17   1  -1    0.57    0.30
  -1 -17  -1   -0.16    0.28
 -17   1  -1   -0.46    0.28
   1  17   1   -0.04    0.25
  17  -1   1   -0.19    0.24
  17  -1   1   -0.53    0.32
  -1 -17   1    0.52    0.31
 -17   1   1   -0.19    0.26
  -1 -17   1   -0.04    0.32
 -17   2  -1    9.07    0.69
  -2 -17  -1   10.46    0.75
   2  17  -1   10.04    0.68
  17  -2  -1    9.53    0.70
  -2 -17  -1    9.92    0.72
  17  -2  -1   10.22    0.73
 -17   2   1   10.83    0.75
  -2 -17   1   10.20    0.76
   2  17   1   10.45    0.69
  17  -2   1    9.19    0.69
  -2 -17   1   10.56    0.70
  17  -2   1    9.90    0.74
 -17   3  -1    2.81    0.41
  17  -3  -1    1.58    0.36
  -3 -17  -1    1.47    0.34
  -3 -17  -1    2.40    0.42
   3  17  -1    1.40    0.30
  17  -3  -1    2.48    0.39
   3  17   1    1.39    0.34
  -3 -17   1    2.65    0.41
  -3 -17   1    2.38    0.36
  17  -3   1    1.80    0.40
 -17   3   1    1.67    0.35
  17  -4  -1    5.18    0.58
   4  17  -1    6.19    0.55
  -4 -17  -1    4.93    0.58
  17  -4  -1    3.77    0.53
 -17   4  -1    4.64    0.52
  -4 -17  -1    6.30    0.60
  -4 -17   1    4.47    0.55
  -4 -17   1    5.25    0.66
  17  -4   1    6.07    0.66
   4  17   1    5.48    0.54
 -17   4   1    6.15    0.61
  -5 -17  -1    0.34    0.32
  -5 -17  -1    0.70    0.27
   5  17  -1    0.47    0.25
  -5 -17  -1    0.56    0.27
  17  -5  -1    0.66    0.32
  -5 -17  -1    0.43    0.30
 -17   5  -1    0.87    0.35
 -17   5  -1    0.16    0.26
   5  17   1   -0.29    0.26
  17  -5   1   -0.28    0.32
  -5 -17   1    0.52    0.32
  17  -5   1   -0.02    0.26
 -17   5   1    0.51    0.29
   5  17   1    0.14    0.31
  -5 -17   1    0.25    0.31
  17  -6  -1    6.62    0.62
   6  17  -1    5.52    0.55
  -6 -17  -1    5.64    0.64
 -17   6  -1    5.14    0.55
  -6 -17  -1    4.46    0.52
  -6 -17  -1    4.63    0.60
  -6 -17  -1    4.54    0.52
 -17   6  -1    5.37    0.62
   6  17   1    5.55    0.67
  -6 -17   1    5.61    0.61
  -6 -17   1    4.44    0.59
  17  -6   1    5.83    0.69
  17  -6   1    4.44    0.55
 -17   6   1    4.08    0.60
   6  17   1    5.99    0.57
 -17   6   1    4.60    0.56
  -6 -17   1    5.18    0.57
  17  -7  -1    1.08    0.31
  -7 -17  -1    0.99    0.31
  -7 -17  -1    0.46    0.39
  -7 -17  -1    1.01    0.33
   7  17  -1    1.09    0.36
  17  -7  -1    1.20    0.35
 -17   7  -1    0.57    0.34
 -17   7  -1    1.05    0.33
  -7 -17  -1    0.87    0.30
   7  17  -1    1.08    0.31
  -7 -17   1    1.53    0.35
  17  -7   1    1.07    0.38
 -17   7   1    1.61    0.37
  17  -7   1    1.39    0.33
  -7 -17   1    1.29    0.39
   7  17   1    0.94    0.33
   7  17   1    2.01    0.43
 -17   7   1    0.91    0.40
  -7 -17   1    1.36    0.38
  -8 -17  -1    0.99    0.31
  -8 -17  -1    1.14    0.35
   8  17  -1    0.72    0.34
  -8 -17  -1    1.09    0.31
  17  -8  -1    0.46    0.37
  -8 -17  -1    1.16    0.41
   8  17  -1    1.02    0.30
 -17   8  -1    1.26    0.35
 -17   8  -1    0.40    0.36
  17  -8  -1    1.08    0.35
  17  -8  -1    1.33    0.33
   8  17   1    1.19    0.34
  -8 -17   1    0.93    0.24
  -8 -17   1    0.69    0.35
  -8 -17   1    1.55    0.38
   8  17   1    0.53    0.39
  17  -8   1    0.34    0.35
  17  -8   1    0.96    0.38
 -17   8   1    0.89    0.41
 -17   8   1    1.02    0.36
  -8 -17   1    0.76    0.35
  17  -8   1    0.63    0.37
  -9 -17  -1   -0.20    0.31
  17  -9  -1    0.32    0.33
 -17   9  -1    0.65    0.33
   9  17  -1   -0.27    0.28
   9  17  -1    0.51    0.38
  -9 -17  -1    0.20    0.36
  -9 -17  -1    0.16    0.35
  17  -9  -1    0.17    0.35
  -9 -17  -1    0.56    0.32
 -17   9  -1    0.31    0.39
  17  -9  -1    0.32    0.39
   9  17   1   -0.04    0.32
   9  17   1    0.74    0.40
  17  -9   1    0.48    0.38
  17  -9   1    0.47    0.35
  -9 -17   1    0.02    0.34
  -9 -17   1    0.49    0.37
 -17   9   1    0.10    0.33
  -9 -17   1    0.32    0.24
  -9 -17   1    0.69    0.39
 -17   9   1    0.09    0.40
  17  -9   1    0.50    0.38
  10  17  -1    1.82    0.38
 -10 -17  -1    0.93    0.33
 -17  10  -1    1.18    0.42
 -10 -17  -1    1.63    0.41
 -10 -17  -1    1.29    0.37
  17 -10  -1    1.66    0.37
  17 -10  -1    2.18    0.47
  17 -10  -1    0.73    0.37
 -17  10  -1    1.50    0.36
  10  17  -1    1.44    0.36
 -10 -17  -1    1.62    0.44
  10  17   1    1.40    0.41
 -10 -17   1    1.04    0.41
 -10 -17   1    1.10    0.31
 -10 -17   1    1.43    0.41
 -17  10   1    1.85    0.47
  17 -10   1    1.06    0.45
  17 -10   1    2.46    0.43
 -17  10   1    1.60    0.39
  17 -10   1    1.80    0.52
 -10 -17   1    1.22    0.43
  10  17   1    1.33    0.45
  11  17  -1    0.56    0.34
  17 -11  -1   -0.97    0.36
 -17  11  -1    0.32    0.36
 -11 -17  -1    0.31    0.38
 -11 -17  -1    0.33    0.36
  11  17  -1    1.05    0.42
  17 -11  -1    0.71    0.52
 -17  11  -1   -0.89    0.42
 -11 -17  -1   -0.60    0.35
  17 -11  -1    0.07    0.36
  11  17   1   -0.29    0.41
 -11 -17   1   -0.04    0.40
 -17  11   1    0.95    0.37
 -17  11   1    0.49    0.46
  17 -11   1    0.88    0.40
 -11 -17   1   -0.45    0.41
  17 -11   1    0.22    0.40
  11  17   1    0.07    0.32
 -11 -17   1    0.09    0.39
  17 -11   1    0.05    0.51
 -11 -17   1    0.31    0.30
  17 -12  -1    1.47    0.47
  12  17  -1    1.10    0.39
 -12 -17  -1    1.13    0.43
  17 -12  -1    1.37    0.42
 -12 -17  -1    1.96    0.40
 -17  12  -1    0.86    0.39
 -17  12  -1    0.77    0.53
  12  17  -1    1.55    0.47
  17 -12   1    0.25    0.44
 -17  12   1    0.88    0.55
 -12 -17   1    0.94    0.48
  12  17   1    1.64    0.50
  17 -12   1    0.86    0.49
 -12 -17   1    0.44    0.41
 -17  12   1    1.24    0.43
 -10  18  -1    1.71    0.53
 -18 -10  -1    1.93    0.56
  10 -18  -1    1.64    0.46
 -18 -10  -1    0.26    0.40
 -10  18  -1    0.42    0.50
  18  10  -1    1.37    0.43
  10 -18  -1    1.27    0.69
  18  10  -1    1.18    0.50
  10 -18  -1    1.03    0.46
  18  10  -1    1.16    0.36
 -10  18  -1    2.51    0.38
 -18 -10  -1    1.11    0.41
  10 -18   1    2.05    0.51
 -10  18   1    1.80    0.46
  10 -18   1    0.74    0.67
 -10  18   1    1.13    0.54
  18  10   1    1.37    0.51
  10 -18   1    1.49    0.52
 -18 -10   1    0.31    0.57
 -18 -10   1    1.19    0.45
 -18 -10   1    1.08    0.46
  18  10   1    1.41    0.51
 -10  18   1    2.08    0.57
  18  10   1    0.36    0.42
  -9  18  -1    0.45    0.44
  18   9  -1    0.80    0.41
  18   9  -1   -0.34    0.33
  -9  18  -1    0.40    0.35
   9 -18  -1    0.05    0.38
 -18  -9  -1    0.15    0.34
 -18  -9  -1   -0.20    0.38
 -18  -9  -1    0.41    0.48
  18   9  -1   -0.07    0.44
   9 -18  -1    0.11    0.37
  -9  18   1    0.60    0.47
  -9  18   1   -0.13    0.37
 -18  -9   1    0.08    0.39
  18   9   1   -0.61    0.42
 -18  -9   1    0.09    0.42
   9 -18   1    0.47    0.57
  18   9   1   -0.11    0.41
   9 -18   1    0.06    0.43
 -18  -9   1    0.15    0.48
  18   9   1    0.02    0.36
   9 -18   1    0.43    0.44
  -9  18   1    0.37    0.50
  -8  18  -1    0.45    0.32
   8 -18  -1    0.02    0.36
  -8  18  -1   -0.48    0.41
  18   8  -1    0.29    0.41
  18   8  -1   -0.11    0.38
 -18  -8  -1    0.18    0.50
   8 -18  -1    0.69    0.37
 -18  -8  -1    0.01    0.37
  -8  18  -1    0.19    0.42
  18   8  -1    0.54    0.34
  -8  18   1    0.10    0.30
  18   8   1    0.06    0.35
   8 -18   1   -0.14    0.36
 -18  -8   1   -0.08    0.38
 -18  -8   1    0.27    0.41
  -8  18   1   -0.16    0.41
 -18  -8   1    0.93    0.51
  18   8   1    0.00    0.41
  18   8   1   -0.11    0.40
   8 -18   1    0.55    0.38
 -18  -7  -1    2.69    0.40
  -7  18  -1    2.38    0.49
  18   7  -1    4.55    0.56
  18   7  -1    1.92    0.48
  18   7  -1    2.83    0.43
  -7  18  -1    3.44    0.56
 -18  -7  -1    2.67    0.59
   7 -18  -1    2.96    0.43
 -18  -7  -1    2.74    0.43
   7 -18  -1    2.99    0.47
  -7  18   1    2.33    0.50
  18   7   1    2.32    0.43
  -7  18   1    3.63    0.50
 -18  -7   1    2.39    0.45
  18   7   1    3.09    0.49
 -18  -7   1    3.23    0.62
  18   7   1    1.68    0.40
 -18  -7   1    4.64    0.61
   7 -18   1    2.11    0.43
   7 -18   1    2.47    0.46
  -7  18   1    2.85    0.55
  18   6  -1   -0.45    0.31
 -18  -6  -1   -0.30    0.30
  -6  18  -1    0.22    0.37
   6 -18  -1    0.77    0.34
 -18  -6  -1    0.11    0.31
  -6  18  -1    0.25    0.38
  -6  18  -1    0.83    0.28
 -18  -6  -1    0.30    0.45
   6 -18  -1    0.26    0.34
  18   6  -1    0.08    0.38
  18   6  -1   -0.04    0.33
 -18  -6   1    1.10    0.41
  -6  18   1   -0.07    0.26
  -6  18   1    0.20    0.43
  18   6   1   -0.56    0.32
  -6  18   1    0.02    0.39
 -18  -6   1    1.20    0.47
   6 -18   1   -0.42    0.38
   6 -18   1   -0.16    0.36
 -18  -6   1   -0.18    0.34
  18   6   1    0.57    0.35
  18   6   1    0.34    0.34
  18   5  -1    0.99    0.35
  -5  18  -1    1.34    0.39
   5 -18  -1    0.75    0.40
  -5  18  -1    0.99    0.27
   5 -18  -1    1.17    0.31
  18   5  -1    1.71    0.46
  18   5  -1    1.23    0.33
 -18  -5  -1    0.86    0.32
  -5  18  -1    1.63    0.37
 -18  -5  -1    1.25    0.50
 -18  -5  -1    1.63    0.36
  -5  18   1    0.83    0.45
  18   5   1    0.94    0.35
  -5  18   1    0.63    0.31
 -18  -5   1    2.11    0.55
   5 -18   1    1.56    0.37
 -18  -5   1    1.07    0.37
   5 -18   1    0.97    0.39
  18   5   1    0.94    0.41
  -5  18   1    1.46    0.40
 -18  -5   1    0.57    0.35
  18   5   1    0.49    0.37
  18   4  -1    0.81    0.39
   4 -18  -1    1.37    0.37
 -18  -4  -1    1.38    0.50
  -4  18  -1    0.82    0.28
   4 -18  -1    1.59    0.36
  18   4  -1    1.05    0.30
  -4  18  -1    1.80    0.37
 -18  -4  -1    2.30    0.38
 -18  -4  -1    1.23    0.38
  -4  18  -1    1.59    0.39
  18   4  -1    1.34    0.34
   4 -18   1    2.07    0.38
  18   4   1    1.37    0.36
  -4  18   1    1.09    0.30
   4 -18   1    2.40    0.42
 -18  -4   1    0.93    0.33
  18   4   1    1.29    0.35
 -18  -4   1    1.06    0.45
  -4  18   1    1.81    0.42
  -4  18   1    1.63    0.44
  18   4   1    1.12    0.44
 -18  -4   1    1.87    0.38
  -3  18  -1    1.18    0.32
 -18  -3  -1    1.81    0.48
 -18  -3  -1    1.42    0.38
 -18  -3  -1    1.87    0.36
  -3  18  -1    1.60    0.37
  -3  18  -1    1.17    0.35
   3 -18  -1    1.95    0.39
   3 -18  -1    1.99    0.32
  18   3  -1    1.63    0.35
  18   3  -1    1.83    0.41
  -3  18   1    2.11    0.44
   3 -18   1    1.69    0.33
 -18  -3   1    1.54    0.40
 -18  -3   1    0.57    0.33
  18   3   1    1.66    0.35
  18   3   1    1.54    0.42
   3 -18   1    1.49    0.44
  18   3   1    1.64    0.39
 -18  -3   1    1.68    0.49
  -3  18   1    0.97    0.36
  18   2  -1   -0.53    0.30
 -18  -2  -1   -0.30    0.35
  18   2  -1    0.37    0.33
   2 -18  -1    0.61    0.34
 -18  -2  -1   -0.70    0.28
  -2  18  -1   -0.15    0.30
 -18  -2  -1   -0.43    0.28
  -2  18  -1    0.18    0.28
   2 -18  -1    0.20    0.26
  18   2   1   -0.06    0.33
 -18  -2   1    0.00    0.33
  18   2   1   -0.17    0.31
   2 -18   1    0.84    0.29
  -2  18   1    0.38    0.31
  -2  18   1    1.01    0.36
  -2  18   1   -0.22    0.29
 -18  -2   1   -0.33    0.38
   2 -18   1    0.16    0.35
 -18  -2   1   -0.05    0.31
  18   2   1    1.07    0.33
 -18  -1  -1    0.25    0.33
   1 -18  -1    0.95    0.37
   1 -18  -1    0.02    0.25
 -18  -1  -1    0.71    0.33
  -1  18  -1    0.67    0.31
  18   1  -1    0.96    0.35
  18   1  -1    0.73    0.32
 -18  -1  -1    1.08    0.40
  -1  18  -1    1.03    0.36
   1 -18   1    1.05    0.33
   1 -18   1    1.36    0.33
 -18  -1   1    0.52    0.33
  18   1   1    0.44    0.34
 -18  -1   1    0.44    0.35
  -1  18   1    0.59    0.32
  18   1   1    0.82    0.37
  18   1   1    1.05    0.35
  -1  18   1    1.15    0.36
   0  18  -1    0.11    0.30
 -18   0  -1    0.62    0.32
   0 -18  -1    0.40    0.32
 -18   0  -1    0.28    0.32
 -18   0  -1    0.31    0.35
  18   0  -1    0.22    0.30
   0 -18  -1    0.67    0.35
   0 -18  -1    0.06    0.27
  18   0   1    0.18    0.31
   0 -18   1   -0.17    0.26
   0  18   1    0.37    0.31
   0 -18   1    0.42    0.31
   0  18   1    0.20    0.28
 -18   0   1   -0.44    0.31
   0 -18   1    0.45    0.33
 -18   0   1    0.09    0.31
  18   0   1    0.79    0.34
  18   0   1   -0.02    0.30
  -1 -18  -1    0.35    0.34
 -18   1  -1    0.59    0.30
 -18   1  -1    0.38    0.33
   1  18  -1    0.63    0.34
   1  18  -1    1.17    0.31
  18  -1  -1   -0.14    0.30
  18  -1  -1    1.15    0.37
  -1 -18  -1    0.54    0.30
  -1 -18  -1    0.52    0.35
  18  -1   1    0.49    0.33
 -18   1   1    0.09    0.31
  18  -1   1    0.53    0.31
  -1 -18   1    0.59    0.30
  -1 -18   1    1.03    0.36
 -18   1   1    0.54    0.34
   1  18   1    1.28    0.40
  18  -1   1    0.53    0.34
   1  18   1    0.69    0.29
  -1 -18   1    0.74    0.33
   2  18  -1   -0.40    0.26
  -2 -18  -1    0.65    0.33
 -18   2  -1   -0.31    0.28
  18  -2  -1    0.14    0.30
 -18   2  -1   -0.12    0.29
   2  18  -1    0.55    0.34
  18  -2  -1    0.02    0.30
  -2 -18  -1    0.40    0.33
  -2 -18   1    0.14    0.31
  -2 -18   1    0.86    0.36
  18  -2   1   -0.44    0.32
  18  -2   1    0.26    0.33
  -2 -18   1    0.16    0.30
 -18   2   1   -0.10    0.31
 -18   2   1    0.46    0.34
   2  18   1    0.48    0.31
  18  -2   1   -0.42    0.27
   2  18   1    0.47    0.37
  -3 -18  -1    1.59    0.35
  -3 -18  -1    1.84    0.40
   3  18  -1    1.42    0.42
   3  18  -1    1.53    0.33
 -18   3  -1    1.66    0.39
  -3 -18  -1    1.33    0.33
 -18   3  -1    1.58    0.39
  18  -3  -1    0.92    0.37
  18  -3  -1    1.83    0.39
 -18   3   1    0.84    0.36
   3  18   1    2.13    0.43
  18  -3   1    1.66    0.39
  -3 -18   1    1.34    0.32
  -3 -18   1    1.16    0.39
   3  18   1    1.22    0.35
  18  -3   1    2.01    0.41
  -3 -18   1    1.79    0.36
  18  -3   1    1.70    0.38
 -18   3   1    1.36    0.37
  18  -4  -1    2.07    0.38
  18  -4  -1    0.84    0.29
 -18   4  -1    1.55    0.34
  18  -4  -1    1.10    0.33
  -4 -18  -1    1.20    0.36
   4  18  -1    1.37    0.36
   4  18  -1    1.17    0.39
 -18   4  -1    0.91    0.38
  -4 -18  -1    1.19    0.38
  -4 -18  -1    1.52    0.31
  18  -4   1    0.20    0.30
   4  18   1    1.37    0.33
  -4 -18   1    1.15    0.37
  -4 -18   1    0.93    0.34
  18  -4   1    1.16    0.38
  -4 -18   1    1.76    0.37
  18  -4   1    1.06    0.37
 -18   4   1    1.37    0.34
 -18   4   1    1.77    0.44
   4  18   1    1.45    0.45
  18  -5  -1    0.82    0.35
  -5 -18  -1    1.50    0.38
 -18   5  -1    1.32    0.34
 -18   5  -1    1.01    0.38
  -5 -18  -1    1.52    0.39
   5  18  -1    2.01    0.33
   5  18  -1    2.58    0.41
  18  -5  -1    0.57    0.33
  -5 -18  -1    0.69    0.31
  18  -5  -1    1.20    0.33
   5  18   1    0.97    0.35
  18  -5   1    0.52    0.35
  -5 -18   1    1.07    0.36
   5  18   1    1.12    0.44
 -18   5   1    1.12    0.38
 -18   5   1    1.41    0.38
  18  -5   1    1.54    0.38
  -5 -18   1    0.42    0.35
  -5 -18   1    0.77    0.37
  -6 -18  -1    0.24    0.28
   6  18  -1    0.89    0.37
   6  18  -1   -0.40    0.29
 -18   6  -1    0.15    0.37
  18  -6  -1   -0.26    0.33
  -6 -18  -1   -0.23    0.29
  18  -6  -1    0.27    0.33
  -6 -18  -1    0.64    0.38
  18  -6  -1    0.32    0.30
 -18   6  -1    0.31    0.33
  -6 -18  -1   -0.33    0.32
  -6 -18   1   -0.37    0.33
  -6 -18   1   -0.01    0.35
  18  -6   1    0.18    0.30
  18  -6   1    0.03    0.35
 -18   6   1    0.34    0.39
   6  18   1    0.49    0.39
   6  18   1    0.50    0.31
  18  -6   1    0.04    0.36
  -6 -18   1    0.69    0.34
 -18   6   1   -0.59    0.31
  -7 -18  -1    2.80    0.45
  -7 -18  -1    2.50    0.39
  18  -7  -1    2.88    0.50
   7  18  -1    4.24    0.57
  -7 -18  -1    2.74    0.49
  18  -7  -1    3.24    0.48
 -18   7  -1    2.59    0.42
  -7 -18  -1    2.44    0.38
 -18   7  -1    2.51    0.45
 -18   7   1    2.55    0.50
   7  18   1    2.77    0.51
  -7 -18   1    2.65    0.45
  -7 -18   1    3.17    0.46
 -18   7   1    3.34    0.45
  18  -7   1    2.92    0.51
  18  -7   1    5.04    0.67
  18  -7   1    2.41    0.42
   7  18   1    4.59    0.58
 -18   8  -1   -0.32    0.32
  -8 -18  -1    0.16    0.33
  18  -8  -1    0.29    0.34
  -8 -18  -1    0.00    0.34
  -8 -18  -1    0.21    0.42
  -8 -18  -1   -0.68    0.31
  18  -8  -1    0.77    0.34
   8  18  -1   -0.07    0.38
   8  18  -1    0.21    0.30
 -18   8  -1   -0.25    0.38
  18  -8  -1    0.90    0.44
 -18   8   1    0.47    0.43
  18  -8   1   -0.18    0.42
 -18   8   1    0.95    0.35
  18  -8   1    0.97    0.43
  -8 -18   1    0.37    0.38
  18  -8   1   -0.51    0.33
   8  18   1   -0.28    0.32
  -8 -18   1    0.00    0.37
  -8 -18   1    0.02    0.35
   8  18   1    0.25    0.45
   9  18  -1    0.35    0.42
 -18   9  -1   -0.21    0.41
  18  -9  -1    0.02    0.38
  -9 -18  -1    0.41    0.42
  -9 -18  -1    0.48    0.43
  18  -9  -1    0.54    0.36
   9  18  -1    0.22    0.34
  18  -9  -1    0.76    0.46
  -9 -18  -1    0.04    0.33
 -18   9  -1    0.49    0.35
  -9 -18  -1   -0.39    0.34
   9  18   1   -0.13    0.35
 -18   9   1    0.30    0.44
  -9 -18   1    0.16    0.42
   9  18   1    0.23    0.49
  18  -9   1    0.36    0.39
  -9 -18   1    0.39    0.23
 -18   9   1   -0.04    0.35
  18  -9   1   -0.04    0.39
  18  -9   1    0.64    0.44
  -9 -18   1    0.29    0.42
  -9 -18   1   -0.02    0.39
  18 -10  -1    0.54    0.40
  18 -10  -1    0.72    0.39
  10  18  -1    1.48    0.37
 -10 -18  -1    1.29    0.40
  18 -10  -1    1.62    0.49
 -18  10  -1    0.92    0.35
 -10 -18  -1    0.93    0.40
 -10 -18  -1    1.49    0.41
 -18  10  -1    1.15    0.51
  10  18  -1    1.32    0.48
  18 -10   1    1.39    0.50
 -18  10   1    1.30    0.51
 -18  10   1    1.96    0.46
  18 -10   1    0.90    0.50
 -10 -18   1    2.45    0.48
 -10 -18   1    1.22    0.48
 -10 -18   1    0.81    0.42
  18 -10   1    1.31    0.45
  10  18   1    1.30    0.51
 -10 -18   1    1.22    0.29
  10  18   1    1.18    0.45
   8 -19  -1    0.25    0.42
 -19  -8  -1    0.05    0.54
 -19  -8  -1    0.93    0.43
   8 -19  -1    0.77    0.43
  19   8  -1    0.73    0.38
  -8  19  -1    0.38    0.51
  -8  19  -1    0.90    0.51
  -8  19  -1    1.08    0.34
 -19  -8  -1    0.25    0.42
  19   8  -1    0.52    0.48
  19   8  -1    0.75    0.44
 -19  -8   1    1.27    0.60
  -8  19   1    0.65    0.35
   8 -19   1    0.28    0.61
  -8  19   1    0.98    0.55
  -8  19   1    0.90    0.53
  19   8   1    0.48    0.47
 -19  -8   1    1.73    0.46
   8 -19   1   -0.15    0.45
  19   8   1    0.03    0.43
 -19  -8   1    0.56    0.45
   8 -19   1    0.24    0.45
  19   8   1    0.18    0.46
 -19  -7  -1    0.44    0.52
  -7  19  -1    0.29    0.31
  19   7  -1   -0.65    0.37
   7 -19  -1   -0.22    0.39
   7 -19  -1    0.23    0.39
  -7  19  -1    0.62    0.46
 -19  -7  -1    0.30    0.41
 -19  -7  -1   -0.29    0.36
  19   7  -1    0.17    0.47
  19   7  -1    0.90    0.39
  -7  19  -1    0.64    0.48
   7 -19   1    0.25    0.43
  -7  19   1    1.00    0.47
  19   7   1    0.02    0.47
  19   7   1   -0.17    0.41
  19   7   1   -0.14    0.43
  -7  19   1    0.57    0.32
 -19  -7   1    0.84    0.58
   7 -19   1   -0.76    0.46
 -19  -7   1   -0.65    0.41
  -7  19   1   -0.27    0.49
 -19  -7   1    0.36    0.44
 -19  -6  -1   -0.17    0.35
  -6  19  -1   -0.10    0.28
  19   6  -1    0.48    0.37
   6 -19  -1    1.33    0.39
  19   6  -1   -0.37    0.46
   6 -19  -1   -0.60    0.39
  -6  19  -1   -0.10    0.39
  19   6  -1    0.53    0.40
 -19  -6  -1   -0.66    0.34
 -19  -6  -1   -0.15    0.50
  -6  19  -1    0.19    0.46
  19   6   1    0.62    0.44
  -6  19   1   -0.11    0.51
 -19  -6   1   -0.03    0.42
  -6  19   1    0.18    0.46
  19   6   1   -0.50    0.37
  -6  19   1   -0.68    0.31
  19   6   1    0.56    0.39
 -19  -6   1    0.04    0.51
   6 -19   1    0.42    0.43
 -19  -6   1   -0.39    0.37
   6 -19   1   -0.31    0.44
  -5  19  -1    0.32    0.38
  19   5  -1   -0.29    0.34
  -5  19  -1   -0.27    0.43
   5 -19  -1    0.63    0.40
   5 -19  -1    0.59    0.38
 -19  -5  -1    0.07    0.33
 -19  -5  -1    0.27    0.47
  19   5  -1    0.24    0.42
  19   5  -1    0.37    0.37
  -5  19  -1    0.46    0.28
 -19  -5   1    0.18    0.36
   5 -19   1    1.26    0.40
 -19  -5   1   -0.07    0.39
  19   5   1   -0.01    0.36
  -5  19   1    0.19    0.32
 -19  -5   1    0.54    0.50
  19   5   1    0.52    0.38
  -5  19   1    0.63    0.47
  19   5   1   -0.14    0.41
  -5  19   1    0.54    0.41
   5 -19   1    0.27    0.43
  19   4  -1   -0.10    0.40
  19   4  -1    0.33    0.37
  -4  19  -1    0.10    0.42
 -19  -4  -1    1.02    0.52
 -19  -4  -1    0.09    0.35
   4 -19  -1    0.58    0.39
 -19  -4  -1    0.05    0.32
  -4  19  -1    0.24    0.29
  19   4  -1    0.01    0.35
  -4  19  -1    0.50    0.38
   4 -19  -1    0.29    0.36
  19   4   1    0.42    0.39
  19   4   1    0.76    0.42
  -4  19   1    0.28    0.39
 -19  -4   1   -0.74    0.37
 -19  -4   1    0.20    0.37
  19   4   1    0.74    0.37
   4 -19   1    0.74    0.40
 -19  -4   1    0.27    0.50
  -4  19   1    0.58    0.46
  -3  19  -1    0.58    0.40
 -19  -3  -1    0.24    0.34
  19   3  -1    0.54    0.38
 -19  -3  -1    0.06    0.36
   3 -19  -1    1.24    0.39
  19   3  -1    1.18    0.34
  -3  19  -1    0.46    0.34
  19   3  -1    0.18    0.42
  -3  19  -1    0.75    0.29
 -19  -3  -1    0.32    0.46
  19   3   1    1.33    0.42
 -19  -3   1    0.16    0.38
  19   3   1    0.79    0.37
   3 -19   1    0.25    0.35
  19   3   1    0.45    0.41
 -19  -3   1    0.86    0.47
  -3  19   1    0.73    0.46
 -19  -3   1    0.59    0.38
   3 -19   1    1.17    0.39
  -3  19   1    0.29    0.33
  -3  19   1    0.57    0.39
   2 -19  -1    0.71    0.35
  19   2  -1    0.39    0.33
 -19  -2  -1    0.34    0.41
 -19  -2  -1   -0.22    0.32
  -2  19  -1    0.04    0.38
  19   2  -1   -0.15    0.30
  -2  19  -1   -0.23    0.28
  -2  19  -1   -0.18    0.32
 -19  -2  -1   -0.10    0.34
   2 -19  -1   -0.69    0.29
  19   2  -1   -0.18    0.41
 -19  -2   1   -0.25    0.32
   2 -19   1    0.35    0.34
   2 -19   1    0.22    0.39
  19   2   1   -0.08    0.35
 -19  -2   1    0.14    0.41
  19   2   1    0.12    0.32
  -2  19   1   -0.35    0.30
  -2  19   1    0.93    0.41
  -2  19   1    0.08    0.35
  19   2   1    0.87    0.36
  19   1  -1    1.42    0.46
  -1  19  -1    0.33    0.29
   1 -19  -1    0.51    0.37
  19   1  -1    0.87    0.33
  19   1  -1    1.33    0.36
 -19  -1  -1    0.36    0.38
 -19  -1  -1    1.14    0.33
   1 -19  -1    0.84    0.29
  -1  19  -1    0.20    0.38
 -19  -1  -1    0.05    0.39
  19   1   1    0.14    0.33
  -1  19   1    0.69    0.38
 -19  -1   1    0.68    0.38
  -1  19   1    0.51    0.32
 -19  -1   1    0.79    0.39
  19   1   1    1.74    0.39
  19   1   1    0.71    0.34
   1 -19   1    1.46    0.36
   1 -19   1    0.74    0.41
   0 -19  -1   -0.11    0.36
   0  19  -1   -0.07    0.28
   0 -19  -1   -0.04    0.37
 -19   0  -1    0.14    0.30
   0 -19  -1    0.09    0.29
   0  19  -1   -0.32    0.36
  19   0  -1    0.37    0.37
  19   0  -1    0.13    0.33
 -19   0  -1    0.43    0.34
   0 -19   1    0.10    0.32
  19   0   1   -0.67    0.33
 -19   0   1    0.16    0.34
  19   0   1    0.42    0.33
   0  19   1    0.68    0.44
  19   0   1    0.38    0.34
 -19   0   1    0.01    0.38
   0 -19   1   -0.18    0.35
   0  19   1    0.14    0.29
   0 -19   1    0.02    0.39
 -19   1  -1    0.51    0.35
  19  -1  -1    0.47    0.37
  -1 -19  -1    1.09    0.32
  -1 -19  -1    0.29    0.39
   1  19  -1    0.77    0.38
  -1 -19  -1    0.66    0.38
 -19   1  -1    0.85    0.31
   1  19  -1    1.70    0.33
  19  -1  -1    0.90    0.35
  19  -1  -1   -0.29    0.32
  -1 -19   1    0.89    0.39
   1  19   1    0.59    0.44
 -19   1   1    0.23    0.38
  19  -1   1    0.97    0.36
  19  -1   1    0.35    0.34
  -1 -19   1    0.29    0.34
  -1 -19   1    0.45    0.39
 -19   1   1    0.52    0.38
   1  19   1    0.76    0.32
  19  -1   1    0.70    0.34
 -19   2  -1    0.08    0.34
   2  19  -1   -0.20    0.37
  19  -2  -1    0.13    0.36
 -19   2  -1    0.36    0.33
   2  19  -1    0.30    0.29
  -2 -19  -1   -0.01    0.35
  19  -2  -1    0.32    0.33
  19  -2  -1    0.19    0.33
  -2 -19  -1   -0.12    0.35
  -2 -19  -1   -0.23    0.30
  19  -2   1    0.89    0.35
 -19   2   1   -0.37    0.36
  -2 -19   1   -0.25    0.32
  19  -2   1    0.02    0.36
  19  -2   1    0.27    0.33
  -2 -19   1    0.14    0.37
   2  19   1   -0.10    0.28
   2  19   1    0.99    0.45
  -2 -19   1   -0.52    0.33
 -19   3  -1    0.73    0.37
  -3 -19  -1    0.54    0.36
 -19   3  -1    0.63    0.34
  19  -3  -1    0.46    0.36
  19  -3  -1    1.51    0.37
   3  19  -1    1.15    0.39
  -3 -19  -1    0.84    0.37
   3  19  -1    0.24    0.27
  19  -3  -1    1.23    0.36
  -3 -19  -1    1.30    0.33
  -3 -19   1    0.12    0.34
 -19   3   1    0.58    0.41
   3  19   1    0.77    0.41
  19  -3   1    0.47    0.38
  19  -3   1    1.13    0.38
 -19   3   1    0.17    0.33
  -3 -19   1    0.45    0.38
  19  -3   1    0.69    0.35
   3  19   1    0.59    0.35
  -3 -19   1    1.09    0.35
 -19   4  -1    0.52    0.31
  19  -4  -1    0.19    0.34
  -4 -19  -1   -0.16    0.31
  19  -4  -1    0.88    0.36
   4  19  -1   -0.30    0.29
  -4 -19  -1   -0.06    0.35
  -4 -19  -1    0.29    0.35
 -19   4  -1    0.40    0.38
   4  19  -1    0.62    0.38
  19  -4  -1   -0.73    0.35
   4  19   1    1.18    0.43
  19  -4   1    1.14    0.38
  -4 -19   1    0.70    0.35
  -4 -19   1    0.93    0.34
  -4 -19   1    0.36    0.40
 -19   4   1    1.05    0.37
 -19   4   1    0.50    0.43
  19  -4   1    0.60    0.34
   4  19   1    0.81    0.35
  19  -4   1    0.20    0.39
  19  -5  -1   -0.01    0.35
   5  19  -1    0.77    0.42
  -5 -19  -1   -0.32    0.36
  -5 -19  -1    0.32    0.32
   5  19  -1    0.77    0.32
  19  -5  -1    0.95    0.36
 -19   5  -1    0.40    0.32
 -19   5  -1    0.45    0.41
  -5 -19  -1    0.09    0.36
  19  -5  -1    0.09    0.35
   5  19   1   -0.17    0.32
  19  -5   1    0.51    0.39
  -5 -19   1    0.56    0.41
 -19   5   1    0.12    0.45
  -5 -19   1    0.23    0.39
 -19   5   1    0.29    0.36
  19  -5   1    0.15    0.36
  19  -5   1   -0.63    0.40
   5  19   1   -1.18    0.45
  -5 -19   1    0.49    0.36
   6  19  -1    0.17    0.38
  19  -6  -1   -0.16    0.40
 -19   6  -1   -0.69    0.39
  -6 -19  -1    0.63    0.39
 -19   6  -1   -0.27    0.32
  19  -6  -1    0.73    0.36
  -6 -19  -1    0.45    0.38
  19  -6  -1    0.06    0.34
   6  19  -1   -0.23    0.32
  -6 -19   1    0.25    0.38
  19  -6   1    0.01    0.41
  19  -6   1    0.36    0.39
 -19   6   1   -0.16    0.36
   6  19   1    0.12    0.34
  -6 -19   1   -0.39    0.39
  -6 -19   1    1.03    0.43
   6  19   1   -0.06    0.47
 -19   6   1    0.21    0.46
  19  -6   1    0.44    0.42
   7  19  -1    1.08    0.50
  -7 -19  -1    0.91    0.40
  19  -7  -1    0.09    0.39
 -19   7  -1    0.62    0.44
   7  19  -1    0.43    0.32
  -7 -19  -1   -0.51    0.40
  19  -7  -1   -0.03    0.44
  19  -7  -1   -0.26    0.36
  -7 -19  -1    0.35    0.32
  -7 -19  -1    0.80    0.37
 -19   7  -1   -0.49    0.34
  -7 -19   1    0.51    0.41
  19  -7   1   -0.55    0.40
 -19   7   1    0.04    0.46
  -7 -19   1    0.38    0.41
  19  -7   1    0.64    0.42
   7  19   1    0.61    0.50
  19  -7   1    0.36    0.39
 -19   7   1    0.57    0.39
   7  19   1    0.94    0.36
  -7 -19   1    0.44    0.42
  19  -8  -1    1.15    0.40
  -8 -19  -1    1.07    0.40
 -19   8  -1    0.29    0.44
  -8 -19  -1    1.09    0.40
   8  19  -1    0.63    0.35
  -8 -19  -1    0.55    0.33
  19  -8  -1    1.37    0.48
  19  -8  -1    1.03    0.41
   8  19  -1    1.43    0.50
 -19   8  -1    0.38    0.35
   8  19   1    0.60    0.55
  -8 -19   1    0.94    0.47
  19  -8   1    0.37    0.50
  19  -8   1    1.04    0.44
  19  -8   1    1.41    0.48
 -19   8   1    0.95    0.42
   8  19   1    1.00    0.42
  -8 -19   1    0.87    0.48
 -19   8   1    0.38    0.47
  -8 -19   1    0.75    0.44
   5 -20  -1    0.05    0.45
   5 -20  -1   -0.20    0.40
 -20  -5  -1   -0.15    0.42
  -5  20  -1   -0.01    0.51
 -20  -5  -1    1.21    0.63
  -5  20  -1    0.20    0.31
 -20  -5  -1   -0.32    0.39
  20   5  -1   -0.58    0.40
  20   5  -1   -0.17    0.39
  20   5  -1   -0.15    0.52
  -5  20  -1    0.21    0.44
 -20  -5   1    0.13    0.56
   5 -20   1    0.31    0.44
  20   5   1    0.65    0.45
 -20  -5   1   -0.63    0.42
  20   5   1    0.35    0.47
  -5  20   1   -0.06    0.54
 -20  -5   1   -0.23    0.43
  -5  20   1   -0.27    0.48
  20   5   1   -0.45    0.41
   5 -20   1    0.17    0.43
  -5  20   1   -0.03    0.32
  20   4  -1    1.27    0.43
 -20  -4  -1    0.51    0.44
 -20  -4  -1    1.51    0.56
  -4  20  -1    1.97    0.35
  20   4  -1    1.93    0.44
   4 -20  -1    1.56    0.39
 -20  -4  -1    1.20    0.42
  -4  20  -1    1.11    0.53
  -4  20  -1    1.43    0.43
  20   4  -1    2.15    0.55
   4 -20  -1    2.34    0.44
   4 -20   1    1.69    0.50
  -4  20   1    1.43    0.49
 -20  -4   1    1.12    0.43
  20   4   1    1.65    0.47
  20   4   1    1.31    0.45
  -4  20   1    1.48    0.55
   4 -20   1    1.38    0.45
  20   4   1    1.48    0.53
 -20  -4   1    0.85    0.48
 -20  -4   1    1.46    0.56
  -4  20   1    0.69    0.39
   3 -20  -1   -0.58    0.38
  -3  20  -1    0.63    0.46
  20   3  -1    0.61    0.40
  20   3  -1   -0.67    0.45
  -3  20  -1   -0.11    0.36
  20   3  -1    0.39    0.39
   3 -20  -1    0.47    0.37
 -20  -3  -1    0.44    0.49
 -20  -3  -1   -0.59    0.39
 -20  -3  -1   -0.24    0.36
  20   3   1    1.07    0.44
  20   3   1    0.04    0.41
  -3  20   1    0.03    0.51
   3 -20   1    0.12    0.39
  -3  20   1   -0.71    0.35
  20   3   1   -0.15    0.47
 -20  -3   1    1.06    0.47
   3 -20   1    0.52    0.46
  -3  20   1   -0.47    0.39
 -20  -3   1    0.70    0.46
  -2  20  -1    2.46    0.51
  20   2  -1    2.36    0.46
  20   2  -1    1.17    0.38
 -20  -2  -1    0.84    0.53
  20   2  -1    1.51    0.46
 -20  -2  -1    0.64    0.38
  -2  20  -1    1.00    0.34
   2 -20  -1    1.99    0.39
   2 -20  -1    2.11    0.47
 -20  -2  -1    0.45    0.40
 -20  -2   1    1.31    0.49
   2 -20   1    1.86    0.46
  -2  20   1    1.60    0.55
  20   2   1    1.75    0.43
  -2  20   1    1.50    0.39
  20   2   1    1.07    0.45
   2 -20   1    1.94    0.46
  20   2   1    1.50    0.41
 -20  -2   1    0.76    0.44
   1 -20  -1    1.28    0.39
   1 -20  -1    0.19    0.33
  -1  20  -1   -0.24    0.39
  20   1  -1    0.05    0.36
 -20  -1  -1    0.39    0.42
  20   1  -1   -0.39    0.44
 -20  -1  -1    0.43    0.38
  -1  20  -1    0.52    0.33
  20   1  -1    0.50    0.38
 -20  -1   1    0.32    0.40
  -1  20   1    0.70    0.53
  -1  20   1    0.43    0.36
  20   1   1    0.25    0.38
  20   1   1    0.69    0.41
   1 -20   1    0.03    0.40
  20   1   1    0.12    0.37
   1 -20   1    0.36    0.43
 -20  -1   1   -0.27    0.43
   1 -20   1    0.48    0.40
  20   0  -1    0.36    0.38
  20   0  -1   -0.26    0.36
   0 -20  -1    0.78    0.34
  20   0  -1    0.44    0.44
   0 -20  -1    0.11    0.37
 -20   0  -1   -0.32    0.39
 -20   0  -1    0.47    0.34
   0  20  -1   -0.04    0.31
   0  20  -1    0.38    0.38
   0 -20   1    0.90    0.38
 -20   0   1   -0.95    0.41
  20   0   1    0.88    0.39
 -20   0   1    0.27    0.38
   0  20   1   -0.27    0.35
   0  20   1   -0.34    0.51
   0 -20   1    0.79    0.45
   0 -20   1    0.24    0.42
  20   0   1    0.43    0.39
  20   0   1    0.22    0.41
  -1 -20  -1    0.77    0.36
  20  -1  -1    0.29    0.38
  20  -1  -1    0.31    0.43
  -1 -20  -1    0.97    0.36
   1  20  -1    1.17    0.47
 -20   1  -1    0.05    0.33
  20  -1  -1   -0.14    0.34
   1  20  -1   -0.07    0.30
 -20   1  -1    0.20    0.39
  -1 -20   1    0.15    0.44
 -20   1   1    0.21    0.39
   1  20   1    0.15    0.37
  -1 -20   1    0.20    0.38
  20  -1   1    0.24    0.37
  20  -1   1    0.34    0.40
   1  20   1   -0.07    0.47
 -20   1   1   -1.03    0.45
  -1 -20   1   -0.74    0.34
  20  -1   1   -0.18    0.39
   2  20  -1    1.17    0.34
   2  20  -1    1.64    0.49
  -2 -20  -1    0.72    0.35
  -2 -20  -1    1.78    0.44
 -20   2  -1    1.14    0.36
  20  -2  -1    0.78    0.39
  20  -2  -1    1.28    0.47
  20  -2  -1    2.30    0.45
 -20   2  -1    1.49    0.43
   2  20   1    0.46    0.38
  -2 -20   1    1.55    0.50
  -2 -20   1    0.95    0.41
   2  20   1    2.27    0.54
  20  -2   1    1.14    0.42
 -20   2   1    1.74    0.41
  -2 -20   1    1.78    0.44
  20  -2   1    1.25    0.41
  20  -2   1    0.98    0.43
 -20   2   1    0.76    0.48
  20  -3  -1    0.02    0.41
   3  20  -1   -0.26    0.47
  -3 -20  -1    0.18    0.38
  -3 -20  -1   -0.02    0.31
  -3 -20  -1    0.20    0.48
 -20   3  -1    0.23    0.40
 -20   3  -1   -0.23    0.33
  20  -3  -1    0.37    0.41
   3  20  -1   -0.16    0.33
 -20   3   1    0.37    0.38
  20  -3   1    0.01    0.39
  -3 -20   1   -0.15    0.43
  -3 -20   1    0.12    0.44
  20  -3   1    0.10    0.41
   3  20   1   -0.24    0.34
  -3 -20   1    0.26    0.41
   3  20   1    0.23    0.48
  20  -3   1    0.48    0.40
 -20   3   1    0.18    0.44
  -4 -20  -1    1.45    0.47
   4  20  -1    2.74    0.58
  -4 -20  -1    0.82    0.38
  20  -4  -1    2.06    0.45
 -20   4  -1    1.73    0.46
  20  -4  -1    1.69    0.42
  20  -4  -1    2.61    0.43
 -20   4  -1    1.43    0.39
   4  20  -1    1.03    0.35
  -4 -20   1    1.95    0.45
  20  -4   1    0.89    0.46
 -20   4   1    2.12    0.47
  20  -4   1    0.79    0.43
  20  -4   1    1.12    0.47
   4  20   1    1.25    0.41
  -4 -20   1    1.81    0.42
  -4 -20   1    1.60    0.46
 -20   4   1    1.50    0.45
   4  20   1    2.16    0.56
 -20   5  -1   -0.57    0.46
   5  20  -1    0.37    0.48
   5  20  -1   -0.23    0.32
  20  -5  -1    0.24    0.38
  20  -5  -1   -0.84    0.42
 -20   5  -1    0.31    0.39
  -5 -20  -1   -0.49    0.38
  20  -5  -1    0.45    0.40
  -5 -20  -1    0.10    0.39
  -5 -20   1    0.27    0.41
  -5 -20   1    0.33    0.42
  20  -5   1    1.02    0.46
  -5 -20   1    0.47    0.40
   5  20   1    0.69    0.57
 -20   5   1    0.34    0.49
 -20   5   1   -0.28    0.38
  20  -5   1    0.78    0.43
  20  -5   1   -0.06    0.42
   5  20   1   -0.10    0.37
   0  -1  -2  256.85    9.23
   0  -1  -2  290.24    9.27
   1   0  -2  264.70    9.39
   0  -1  -2  244.06    9.39
  -1   0  -2  261.51    9.00
  -1   0  -2  242.09    9.25
   0   1   2  257.34    9.39
  -1   0   2  211.85    9.28
  -1  -1  -2   17.17    0.63
   1  -1  -2   16.10    0.63
  -1   1  -2   15.78    0.62
  -1   1  -2   15.34    0.63
  -1  -1  -2   18.54    0.64
   1  -1  -2   16.03    0.66
  -1   1  -2   15.76    0.63
   1   1  -2   17.95    0.64
   1   1  -2   18.03    0.63
  -1  -1  -2   18.99    0.64
  -1  -1   2   15.07    0.62
  -1   1   2   18.82    0.63
  -1   1   2   17.97    0.66
   1  -1   2   17.97    0.62
   1  -1   2   17.91    0.63
   1   1   2   16.05    0.63
   1   1   2   16.15    0.63
  -1  -1   2   15.47    0.64
  -1   2  -2   44.21    1.67
   1  -2  -2   44.38    1.66
   1  -2  -2   46.83    1.67
   2   1  -2   45.48    1.61
  -2  -1  -2   44.62    1.67
  -1   2  -2   44.82    1.61
   2   1  -2   46.83    1.66
  -2  -1  -2   46.26    1.67
   1  -2  -2   43.89    1.69
   2   1  -2   44.83    1.66
  -1   2  -2   43.12    1.66
  -2  -1  -2   44.39    1.62
  -1   2   2   46.48    1.66
  -1   2   2   47.81    1.67
   2   1   2   44.62    1.62
   1  -2   2   44.04    1.66
   2   1   2   43.86    1.67
  -2  -1   2   46.08    1.66
   2   1   2   46.18    1.67
  -2  -1   2   44.65    1.66
   1  -2   2   44.91    1.60
   1  -2   2   45.05    1.67
  -1   2   2   45.00    1.69
   0  -2  -2    5.55    0.28
   0  -2  -2    6.02    0.25
   0   2  -2    5.85    0.26
   2   0  -2    5.96    0.25
   2   0  -2    6.17    0.25
  -2   0  -2    5.92    0.26
  -2   0  -2    6.00    0.26
  -2   0  -2    5.82    0.27
   0  -2   2    5.40    0.25
   0  -2   2    5.98    0.25
  -2   0   2    5.72    0.27
   0   2   2    6.11    0.25
   2   0   2    5.83    0.25
   2   0   2    5.88    0.27
   2   0   2    5.86    0.26
  -2   0   2    6.24    0.25
   0   2   2    6.04    0.26
  -2   1  -2   43.95    1.61
   1   2  -2   45.23    1.66
  -1  -2  -2   45.97    1.67
  -2   1  -2   43.25    1.67
  -1  -2  -2   46.68    1.66
  -2   1  -2   44.21    1.66
   1   2  -2   43.92    1.66
  -1  -2  -2   43.96    1.62
   2  -1  -2   47.01    1.66
   1   2  -2   45.95    1.64
   2  -1  -2   45.34    1.66
   2  -1   2   42.91    1.61
   1   2   2   45.53    1.66
  -2   1   2   45.38    1.66
  -2   1   2   46.96    1.66
   2  -1   2   45.45    1.66
  -1  -2   2   44.84    1.66
   1   2   2   45.55    1.66
  -1  -2   2   44.13    1.65
   2  -1   2   45.78    1.67
  -2   1   2   42.78    1.68
   2   2  -2   56.31    2.03
  -2   2  -2   57.52    2.13
  -2   2  -2   58.35    2.12
  -2   2  -2   57.60    2.06
  -2  -2  -2   56.57    2.06
   2   2  -2   56.85    2.12
   2   2  -2   55.43    2.12
   2  -2  -2   59.25    2.12
   2  -2  -2   60.41    2.13
  -2  -2  -2   54.52    2.12
  -2  -2  -2   56.48    2.13
   2  -2  -2   60.32    2.14
  -2  -2   2   59.01    2.12
  -2   2   2   56.88    2.12
   2  -2   2   56.74    2.05
   2  -2   2   55.23    2.12
   2   2   2   60.80    2.07
   2  -2   2   53.96    2.12
   2   2   2   57.55    2.12
  -2   2   2   58.11    2.13
  -2  -2   2   58.84    2.03
   2   2   2   59.49    2.13
  -2   2   2   56.17    2.14
   3   2  -2   34.61    1.25
  -3  -2  -2   33.10    1.22
  -3  -2  -2   34.06    1.26
   2  -3  -2   32.17    1.25
   2  -3  -2   31.45    1.26
  -2   3  -2   30.82    1.26
   2  -3  -2   32.42    1.26
   3   2  -2   34.89    1.25
   3   2  -2   33.20    1.19
  -3  -2  -2   34.41    1.25
   2  -3   2   32.78    1.26
   2  -3   2   33.17    1.21
   3   2   2   33.09    1.25
   2  -3   2   33.18    1.25
  -3  -2   2   31.66    1.20
  -2   3   2   34.68    1.27
  -3  -2   2   31.45    1.24
  -2   3   2   34.32    1.25
   3   2   2   31.81    1.25
  -2   3   2   34.36    1.26
  -3  -2   2   32.53    1.24
   3   2   2   31.28    1.22
   1  -3  -2   26.38    1.02
  -1   3  -2   24.70    1.02
   3   1  -2   29.12    1.03
  -1   3  -2   26.27    1.04
  -3  -1  -2   27.70    1.03
  -3  -1  -2   27.62    1.01
   3   1  -2   28.79    1.00
   1  -3  -2   25.08    1.04
   3   1  -2   27.88    1.03
  -3  -1  -2   28.24    1.03
   1  -3  -2   25.79    1.04
  -1   3   2   29.06    1.03
   3   1   2   25.27    1.03
  -1   3   2   28.62    1.05
  -1   3   2   28.88    1.04
   3   1   2   25.31    1.01
  -3  -1   2   25.82    1.02
  -3  -1   2   25.29    1.00
   1  -3   2   27.85    0.99
   1  -3   2   27.81    1.03
  -3  -1   2   26.76    1.02
   1  -3   2   27.38    1.03
   3   1   2   26.20    1.03
   0  -3  -2  263.53    9.64
  -3   0  -2  258.85    9.54
   3   0  -2  256.39    9.52
   0  -3  -2  261.23    9.61
  -3   0  -2  263.60    9.26
   0  -3  -2  262.88    9.57
   0   3  -2  250.04    9.51
   0   3  -2  263.89    9.60
  -3   0  -2  264.81    9.58
   3   0  -2  260.65    9.54
   3   0   2  249.16    9.19
   0   3   2  260.59    9.52
   0   3   2  251.16    9.56
   0  -3   2  267.32    9.59
   0   3   2  258.31    9.54
   3   0   2  250.03    9.52
   3   0   2  264.27    9.59
  -3   0   2  268.21    9.57
   0  -3   2  249.77    9.51
  -3   1  -2   25.38    1.01
  -3   1  -2   25.44    1.03
   3  -1  -2   26.40    1.03
  -1  -3  -2   28.06    1.01
   1   3  -2   28.59    1.04
   3  -1  -2   26.66    1.03
  -1  -3  -2   28.75    1.03
  -3   1  -2   25.64    1.04
  -1  -3  -2   28.51    1.04
  -1  -3  -2   27.33    1.04
   3  -1   2   27.18    1.04
  -1  -3   2   25.16    1.02
   3  -1   2   28.48    1.02
  -3   1   2   28.61    1.03
   3  -1   2   27.85    1.03
  -3   1   2   28.60    1.03
   1   3   2   25.94    1.02
  -1  -3   2   25.80    1.03
   1   3   2   26.34    1.03
  -3   2  -2   31.99    1.26
  -3   2  -2   31.04    1.22
  -2  -3  -2   34.66    1.26
  -3   2  -2   31.23    1.25
  -2  -3  -2   31.53    1.22
   2   3  -2   35.43    1.25
   3  -2  -2   32.41    1.26
   2   3  -2   33.85    1.18
   3  -2  -2   32.49    1.25
   2   3  -2   34.79    1.26
  -2  -3  -2   33.89    1.25
   2   3   2   31.91    1.26
   2   3   2   31.60    1.25
  -3   2   2   35.50    1.25
   2   3   2   31.35    1.22
   3  -2   2   34.15    1.25
  -2  -3   2   32.40    1.25
   3  -2   2   34.57    1.23
   3  -2   2   34.16    1.27
  -3   2   2   35.05    1.26
  -2  -3   2   32.10    1.18
  -2  -3   2   31.17    1.24
  -3  -3  -2   81.73    2.90
   3   3  -2   81.88    3.00
  -3   3  -2   79.89    3.01
   3   3  -2   81.10    2.99
  -3   3  -2   80.72    2.90
  -3  -3  -2   84.85    3.01
   3  -3  -2   82.33    2.99
   3  -3  -2   82.11    3.01
  -3  -3  -2   80.80    2.99
  -3   3  -2   79.65    2.99
   3   3  -2   81.16    2.86
  -3  -3   2   77.76    2.99
  -3   3   2   82.29    2.99
  -3  -3   2   80.85    2.86
   3  -3   2   81.57    2.99
   3   3   2   77.53    3.00
   3   3   2   81.92    2.90
  -3  -3   2   81.44    2.99
   3   3   2   78.04    2.99
  -3   3   2   78.54    3.01
  -3   3   2   83.70    3.00
   3  -3   2   82.41    2.90
   3  -3   2   80.51    3.00
   4   3  -2    2.78    0.19
   4   3  -2    3.15    0.22
  -3   4  -2    3.62    0.23
  -4  -3  -2    2.76    0.23
  -3   4  -2    3.53    0.25
   4   3  -2    3.37    0.23
   3  -4  -2    3.55    0.23
   3  -4  -2    3.62    0.26
  -4  -3  -2    2.59    0.23
  -4  -3  -2    3.10    0.22
   4   3   2    3.55    0.22
   4   3   2    3.43    0.23
  -3   4   2    3.07    0.25
  -4  -3   2    3.98    0.22
   3  -4   2    2.74    0.22
  -4  -3   2    3.61    0.23
  -3   4   2    3.03    0.22
   4   3   2    3.73    0.24
  -4  -3   2    3.39    0.21
   3  -4   2    2.88    0.24
   3  -4   2    2.83    0.25
  -3   4   2    2.89    0.24
  -2   4  -2  129.63    4.74
   2  -4  -2  130.94    4.72
   4   2  -2  127.43    4.55
  -4  -2  -2  125.79    4.73
  -4  -2  -2  126.49    4.57
   4   2  -2  126.75    4.72
   2  -4  -2  132.78    4.75
   4   2  -2  127.80    4.73
   2  -4  -2  135.84    4.74
  -2   4  -2  126.32    4.72
  -4  -2  -2  126.74    4.73
   4   2   2  131.51    4.73
   4   2   2  125.82    4.72
  -4  -2   2  131.31    4.55
  -2   4   2  127.53    4.74
   2  -4   2  124.52    4.72
  -2   4   2  129.56    4.74
   4   2   2  128.36    4.57
  -4  -2   2  135.32    4.72
   2  -4   2  125.03    4.73
  -4  -2   2  127.71    4.72
   2  -4   2  129.67    4.55
  -2   4   2  128.86    4.72
   1  -4  -2   22.83    0.83
  -1   4  -2   21.76    0.81
  -4  -1  -2   18.26    0.81
   1  -4  -2   22.04    0.81
   1  -4  -2   21.81    0.82
   4   1  -2   19.19    0.81
  -4  -1  -2   18.85    0.80
  -1   4  -2   22.92    0.83
   4   1  -2   18.94    0.79
  -4  -1  -2   19.03    0.81
  -4  -1   2   22.62    0.81
  -4  -1   2   22.38    0.81
  -1   4   2   19.40    0.82
   1  -4   2   18.86    0.80
  -1   4   2   17.83    0.81
   1  -4   2   18.27    0.81
  -1   4   2   19.39    0.80
   4   1   2   22.14    0.81
   4   1   2   21.47    0.82
   4   1   2   20.92    0.82
  -4  -1   2   22.22    0.80
   0  -4  -2    5.24    0.29
   4   0  -2    5.83    0.31
   4   0  -2    5.93    0.29
  -4   0  -2    5.09    0.30
   0   4  -2    5.75    0.30
   0  -4  -2    5.59    0.28
  -4   0  -2    5.79    0.30
  -4   0  -2    5.67    0.29
   0   4  -2    5.80    0.28
   0   4   2    5.69    0.30
   0   4   2    5.71    0.28
  -4   0   2    5.36    0.28
   4   0   2    5.25    0.28
   0  -4   2    5.70    0.29
   0   4   2    5.67    0.30
   4   0   2    5.62    0.30
  -4   0   2    5.67    0.28
   4   0   2    5.87    0.31
  -4   1  -2   21.77    0.81
  -4   1  -2   21.64    0.81
  -4   1  -2   21.54    0.82
  -1  -4  -2   18.76    0.81
   1   4  -2   18.82    0.80
  -1  -4  -2   18.89    0.80
   4  -1  -2   22.62    0.81
   4  -1  -2   22.02    0.81
   1   4  -2   19.29    0.79
  -1  -4  -2   18.95    0.80
   1   4   2   21.84    0.80
   4  -1   2   18.25    0.79
  -1  -4   2   21.62    0.81
   1   4   2   21.15    0.81
  -4   1   2   18.74    0.79
  -1  -4   2   22.05    0.80
   4  -1   2   18.30    0.80
  -4   1   2   18.61    0.80
  -2  -4  -2  130.43    4.75
  -4   2  -2  128.81    4.75
   4  -2  -2  129.35    4.76
   2   4  -2  128.86    4.75
  -4   2  -2  126.80    4.60
   4  -2  -2  130.80    4.75
   2   4  -2  130.29    4.54
  -2  -4  -2  127.95    4.76
   2   4  -2  128.17    4.74
  -2  -4  -2  130.21    4.58
  -4   2  -2  128.43    4.76
  -4   2   2  129.24    4.74
   4  -2   2  125.50    4.59
   4  -2   2  128.03    4.76
   2   4   2  133.18    4.76
   2   4   2  129.04    4.74
  -4   2   2  133.24    4.75
  -2  -4   2  126.75    4.75
  -2  -4   2  131.81    4.74
  -2  -4   2  134.20    4.57
   4  -2   2  125.65    4.74
  -4   3  -2    3.57    0.26
   3   4  -2    3.32    0.24
  -3  -4  -2    3.29    0.23
  -3  -4  -2    2.80    0.22
  -3  -4  -2    2.96    0.24
   4  -3  -2    3.87    0.25
  -4   3  -2    3.68    0.24
   4  -3  -2    3.53    0.23
   3   4  -2    3.30    0.22
  -4   3  -2    3.55    0.26
   3   4  -2    2.88    0.18
   3   4   2    3.68    0.24
   4  -3   2    3.02    0.24
   4  -3   2    2.95    0.24
   4  -3   2    2.91    0.22
   3   4   2    3.57    0.23
  -4   3   2    3.00    0.22
  -3  -4   2    3.60    0.19
   3   4   2    3.87    0.23
  -4   3   2    3.24    0.23
   4   4  -2   62.17    2.27
  -4   4  -2   57.76    2.28
   4  -4  -2   57.54    2.26
  -4  -4  -2   58.84    2.20
  -4  -4  -2   64.83    2.28
   4   4  -2   60.03    2.27
   4  -4  -2   59.24    2.28
  -4  -4  -2   62.39    2.27
   4   4  -2   61.57    2.16
  -4   4  -2   57.36    2.26
   4  -4   2   62.63    2.27
  -4   4   2   61.96    2.29
   4  -4   2   60.65    2.21
  -4  -4   2   59.15    2.27
  -4   4   2   62.97    2.28
  -4  -4   2   58.38    2.16
  -4  -4   2   60.24    2.26
  -4   4   2   61.58    2.26
   4   4   2   58.43    2.20
   4  -4   2   62.87    2.29
   4   4   2   57.07    2.26
   4   4   2   58.61    2.27
  -5  -4  -2   14.30    0.63
  -5  -4  -2   14.71    0.62
  -4   5  -2   13.63    0.64
  -5  -4  -2   14.20    0.62
  -4   5  -2   13.06    0.62
   4  -5  -2   14.12    0.65
   5   4  -2   14.18    0.62
   4  -5  -2   13.23    0.62
   5   4  -2   15.16    0.58
  -5  -4   2   13.67    0.58
   5   4   2   12.82    0.62
  -4   5   2   15.13    0.64
  -4   5   2   14.97    0.62
   4  -5   2   14.51    0.63
   5   4   2   13.34    0.61
  -5  -4   2   13.47    0.62
  -5  -4   2   13.63    0.61
   4  -5   2   15.05    0.63
   5   4   2   13.06    0.60
   4  -5   2   13.82    0.64
  -4   5   2   14.77    0.64
  -5  -3  -2   36.69    1.49
  -3   5  -2   39.63    1.52
   3  -5  -2   38.56    1.49
   5   3  -2   38.25    1.49
   3  -5  -2   38.98    1.52
  -5  -3  -2   38.45    1.50
  -3   5  -2   39.79    1.50
  -5  -3  -2   38.59    1.46
   5   3  -2   38.14    1.43
   5   3  -2   38.09    1.49
   3  -5   2   37.54    1.51
   3  -5   2   38.72    1.45
  -3   5   2   39.48    1.49
   5   3   2   39.73    1.50
   5   3   2   39.97    1.46
   5   3   2   38.97    1.49
   3  -5   2   37.82    1.49
  -5  -3   2   38.25    1.44
  -5  -3   2   39.63    1.49
  -3   5   2   38.75    1.51
  -3   5   2   38.14    1.51
  -5  -3   2   40.28    1.49
   2  -5  -2   99.31    3.64
   5   2  -2   93.16    3.61
  -5  -2  -2   97.11    3.62
  -2   5  -2   98.27    3.63
   2  -5  -2   99.15    3.61
   5   2  -2   97.68    3.48
   5   2  -2   96.78    3.61
  -2   5  -2   98.67    3.61
  -5  -2  -2   98.62    3.51
  -5  -2  -2   94.85    3.61
   2  -5  -2   98.17    3.62
   5   2   2   94.13    3.61
  -2   5   2   97.79    3.63
   2  -5   2   96.03    3.61
  -2   5   2   99.83    3.63
   2  -5   2   93.72    3.62
  -5  -2   2   99.83    3.49
   5   2   2   98.80    3.62
  -2   5   2   97.97    3.61
  -5  -2   2   98.58    3.61
   5   2   2   99.69    3.50
  -5  -2   2  100.90    3.61
  -5  -1  -2   34.66    1.31
  -5  -1  -2   36.32    1.29
   5   1  -2   36.66    1.31
   1  -5  -2   31.83    1.32
  -5  -1  -2   35.60    1.31
  -1   5  -2   31.92    1.30
   1  -5  -2   31.09    1.29
   1  -5  -2   31.73    1.30
  -1   5  -2   32.05    1.31
   5   1  -2   35.88    1.31
   5   1  -2   34.64    1.27
  -1   5   2   37.37    1.32
   1  -5   2   36.51    1.30
   5   1   2   31.66    1.27
  -1   5   2   35.28    1.31
  -5  -1   2   31.23    1.27
  -5  -1   2   31.61    1.29
   1  -5   2   35.08    1.31
   5   1   2   31.40    1.30
   5   1   2   31.56    1.30
  -5  -1   2   32.52    1.30
  -1   5   2   36.37    1.30
  -5   0  -2    3.30    0.24
   5   0  -2    3.32    0.25
   0  -5  -2    3.70    0.24
   0   5  -2    3.36    0.23
   0   5  -2    3.18    0.25
  -5   0  -2    3.27    0.24
  -5   0  -2    3.15    0.24
   0   5  -2    3.62    0.17
   5   0  -2    3.47    0.24
   0  -5  -2    3.48    0.22
  -5   0   2    3.31    0.23
  -5   0   2    3.16    0.24
   0   5   2    3.25    0.23
   0  -5   2    3.36    0.24
   0   5   2    3.22    0.22
   5   0   2    3.45    0.26
   5   0   2    3.18    0.24
   0   5   2    3.35    0.26
   5  -1  -2   31.94    1.30
  -1  -5  -2   35.14    1.30
  -1  -5  -2   36.90    1.32
  -5   1  -2   30.99    1.28
   5  -1  -2   31.24    1.28
  -1  -5  -2   35.88    1.30
  -5   1  -2   31.66    1.30
   5  -1  -2   31.30    1.30
   1   5  -2   35.94    1.31
   1   5  -2   36.68    1.30
  -5   1  -2   31.86    1.30
  -5   1   2   36.53    1.30
   1   5   2   31.36    1.30
   5  -1   2   35.53    1.31
  -1  -5   2   31.83    1.29
   5  -1   2   36.70    1.29
  -1  -5   2   31.17    1.30
   5  -1   2   35.35    1.30
   1   5   2   30.50    1.29
  -5   1   2   36.45    1.30
   1   5   2   32.29    1.29
   5  -2  -2   98.22    3.60
   2   5  -2   98.28    3.60
   5  -2  -2   97.93    3.62
   2   5  -2   96.13    3.61
  -5   2  -2   98.00    3.62
  -2  -5  -2   96.70    3.60
  -2  -5  -2   99.92    3.62
  -5   2  -2   98.92    3.51
  -2  -5  -2   97.88    3.48
  -5   2  -2   99.95    3.61
  -2  -5  -2   95.19    3.60
   2   5   2   95.13    3.61
   5  -2   2   94.95    3.60
  -5   2   2   97.58    3.60
  -5   2   2   96.85    3.60
   5  -2   2   94.20    3.61
   2   5   2   98.57    3.60
  -2  -5   2   98.27    3.43
  -2  -5   2   97.35    3.59
  -2  -5   2   95.96    3.60
   5  -2   2   98.06    3.50
   3   5  -2   37.15    1.51
  -3  -5  -2   36.95    1.49
   3   5  -2   38.84    1.50
  -3  -5  -2   39.29    1.52
   5  -3  -2   39.85    1.52
  -5   3  -2   39.43    1.52
  -5   3  -2   38.39    1.48
   5  -3  -2   40.58    1.50
   3   5  -2   38.56    1.41
  -5   3  -2   38.61    1.50
  -3  -5  -2   39.14    1.46
   3   5   2   39.64    1.51
  -3  -5   2   40.49    1.50
  -3  -5   2   39.55    1.50
   3   5   2   39.52    1.46
   5  -3   2   39.59    1.48
  -3  -5   2   38.94    1.41
   5  -3   2   36.40    1.51
   3   5   2   40.44    1.50
   5  -3   2   38.38    1.50
  -5   3   2   38.72    1.50
  -5   3   2   39.15    1.51
  -4  -5  -2   14.53    0.62
  -4  -5  -2   14.46    0.62
  -5   4  -2   13.88    0.64
   5  -4  -2   13.68    0.64
   4   5  -2   14.39    0.62
   4   5  -2   14.83    0.57
  -4  -5  -2   15.15    0.65
   5  -4  -2   13.56    0.62
   4   5  -2   14.11    0.63
  -5   4  -2   13.93    0.63
  -5   4   2   15.06    0.64
   5  -4   2   14.68    0.65
  -4  -5   2   13.89    0.63
   4   5   2   14.00    0.62
  -5   4   2   14.77    0.63
   4   5   2   13.58    0.63
   5  -4   2   15.00    0.64
   4   5   2   13.03    0.62
  -4  -5   2   14.07    0.62
  -4  -5   2   13.63    0.57
   5  -4   2   15.28    0.63
   5   5  -2   40.33    1.57
  -5  -5  -2   39.26    1.57
  -5   5  -2   39.42    1.60
  -5  -5  -2   40.86    1.54
   5   5  -2   40.46    1.49
  -5   5  -2   39.42    1.58
   5  -5  -2   39.30    1.57
   5   5  -2   39.98    1.58
   5  -5  -2   41.66    1.61
  -5  -5  -2   42.23    1.59
   5   5   2   40.46    1.53
  -5   5   2   41.30    1.60
   5   5   2   40.95    1.59
   5   5   2   40.62    1.58
  -5  -5   2   41.20    1.58
  -5  -5   2   39.81    1.50
   5  -5   2   41.27    1.55
   5  -5   2   40.12    1.58
  -5  -5   2   40.36    1.57
   5  -5   2   41.81    1.60
  -5   5   2   40.82    1.57
   5  -6  -2   13.70    0.65
   6   5  -2   14.32    0.65
  -5   6  -2   13.69    0.64
  -5   6  -2   13.50    0.67
   6   5  -2   14.52    0.60
   6   5  -2   14.34    0.64
   5  -6  -2   13.66    0.67
  -6  -5  -2   14.71    0.64
  -6  -5  -2   14.64    0.64
  -6  -5  -2   14.13    0.66
  -6  -5   2   13.69    0.61
  -5   6   2   14.46    0.66
   5  -6   2   13.48    0.66
  -5   6   2   14.33    0.67
  -5   6   2   14.35    0.64
   5  -6   2   14.92    0.67
   6   5   2   13.97    0.66
  -6  -5   2   14.05    0.64
   6   5   2   13.42    0.63
   5  -6   2   14.07    0.64
  -6  -5   2   13.77    0.64
   6   5   2   13.34    0.63
   6   4  -2   48.68    1.79
   6   4  -2   48.89    1.87
  -6  -4  -2   48.95    1.87
  -6  -4  -2   50.49    1.88
   4  -6  -2   48.31    1.87
  -4   6  -2   46.43    1.89
   4  -6  -2   47.85    1.90
   6   4  -2   48.10    1.86
  -4   6  -2   47.39    1.87
  -6  -4  -2   50.15    1.82
  -6  -4   2   47.42    1.86
   6   4   2   48.50    1.88
  -4   6   2   49.36    1.89
  -6  -4   2   47.19    1.79
   4  -6   2   50.50    1.89
   4  -6   2   49.82    1.83
  -6  -4   2   47.74    1.86
   6   4   2   46.44    1.86
  -4   6   2   50.78    1.87
   4  -6   2   49.07    1.86
   6   4   2   46.28    1.81
  -4   6   2   49.30    1.89
   6   3  -2   74.26    2.94
   6   3  -2   75.04    2.94
  -3   6  -2   78.34    2.96
  -6  -3  -2   75.98    2.85
   6   3  -2   76.65    2.83
  -3   6  -2   80.84    2.94
   3  -6  -2   81.74    2.94
  -6  -3  -2   77.25    2.94
   3  -6  -2   81.17    2.97
  -6  -3  -2   77.81    2.94
  -6  -3   2   81.50    2.84
  -6  -3   2   80.42    2.94
   6   3   2   80.66    2.94
   3  -6   2   75.82    2.96
  -6  -3   2   80.77    2.94
   6   3   2   79.43    2.95
  -3   6   2   76.82    2.95
   3  -6   2   75.87    2.93
  -3   6   2   77.65    2.93
  -3   6   2   78.51    2.96
   6   3   2   80.56    2.85
   6   2  -2    3.04    0.24
  -6  -2  -2    3.10    0.25
   2  -6  -2    2.52    0.23
  -2   6  -2    2.46    0.24
  -2   6  -2    2.68    0.26
   2  -6  -2    2.71    0.24
   6   2  -2    3.24    0.25
   6   2  -2    2.97    0.24
  -6  -2  -2    2.99    0.26
   2  -6  -2    2.85    0.27
  -6  -2  -2    3.02    0.25
   2  -6   2    3.27    0.24
   6   2   2    2.33    0.24
  -6  -2   2    2.03    0.25
   6   2   2    2.28    0.24
  -2   6   2    3.20    0.24
  -6  -2   2    2.82    0.23
  -2   6   2    3.12    0.28
   6   2   2    2.63    0.24
  -2   6   2    2.84    0.25
   2  -6   2    2.94    0.26
  -6  -2   2    2.58    0.23
  -1   6  -2   14.92    0.66
   1  -6  -2   15.25    0.66
   1  -6  -2   14.93    0.66
  -6  -1  -2   15.89    0.68
   6   1  -2   15.39    0.66
  -6  -1  -2   16.27    0.67
  -6  -1  -2   15.96    0.67
   6   1  -2   15.95    0.67
  -1   6  -2   15.05    0.68
   1  -6  -2   15.72    0.69
   6   1  -2   16.31    0.66
  -1   6   2   16.23    0.67
   6   1   2   14.44    0.66
   1  -6   2   16.64    0.66
  -6  -1   2   15.21    0.67
  -1   6   2   16.45    0.66
   1  -6   2   15.51    0.68
  -6  -1   2   14.76    0.66
  -1   6   2   16.30    0.69
   6   1   2   14.87    0.67
  -6  -1   2   14.71    0.65
   6   1   2   14.37    0.66
   0   6  -2    2.29    0.14
   0  -6  -2    1.94    0.20
   6   0  -2    2.08    0.22
  -6   0  -2    2.04    0.21
   6   0  -2    2.34    0.21
   6   0  -2    1.68    0.23
  -6   0  -2    2.09    0.24
   0  -6  -2    1.77    0.20
   0   6  -2    1.92    0.22
   0  -6  -2    1.87    0.23
  -6   0  -2    1.78    0.21
   0   6  -2    1.88    0.20
   0   6   2    2.03    0.21
  -6   0   2    1.93    0.21
   6   0   2    2.20    0.24
  -6   0   2    1.89    0.24
   6   0   2    1.97    0.23
   6   0   2    2.20    0.22
   0   6   2    1.85    0.20
   0  -6   2    2.33    0.21
  -6   0   2    2.07    0.20
   0  -6   2    1.89    0.22
   0   6   2    1.97    0.23
   6  -1  -2   15.12    0.67
   6  -1  -2   14.85    0.67
  -1  -6  -2   16.54    0.66
   1   6  -2   16.35    0.68
  -6   1  -2   14.45    0.67
   1   6  -2   15.41    0.65
  -1  -6  -2   15.94    0.68
   1   6  -2   16.09    0.59
   6  -1  -2   14.73    0.66
  -1  -6  -2   15.87    0.65
  -6   1  -2   14.73    0.67
  -6   1  -2   15.00    0.66
  -1  -6   2   15.18    0.65
   6  -1   2   15.62    0.66
   1   6   2   15.00    0.67
   1   6   2   14.44    0.65
   1   6   2   14.62    0.65
  -1  -6   2   14.35    0.66
   6  -1   2   16.56    0.68
   6  -1   2   15.21    0.67
  -6   1   2   15.77    0.66
  -6   1   2   15.74    0.66
   6  -2  -2    2.37    0.23
   6  -2  -2    2.78    0.26
  -6   2  -2    2.30    0.25
  -2  -6  -2    2.77    0.27
  -6   2  -2    2.32    0.25
  -2  -6  -2    3.21    0.24
  -2  -6  -2    3.23    0.24
  -6   2  -2    2.56    0.28
   6  -2  -2    2.43    0.28
   6  -2   2    3.27    0.27
  -6   2   2    2.85    0.25
   6  -2   2    3.11    0.28
  -2  -6   2    2.58    0.25
   2   6   2    2.19    0.23
   2   6   2    2.47    0.26
   6  -2   2    2.80    0.25
  -2  -6   2    2.22    0.24
  -6   2   2    2.77    0.25
  -2  -6   2    2.72    0.13
  -2  -6   2    2.64    0.17
  -6   3  -2   80.15    2.90
   3   6  -2   76.80    2.95
   6  -3  -2   79.87    2.96
  -3  -6  -2   78.17    2.96
  -6   3  -2   81.93    2.98
  -3  -6  -2   77.38    2.97
   6  -3  -2   81.32    2.98
  -3  -6  -2   76.78    2.86
   3   6  -2   77.15    2.97
  -6   3  -2   81.34    2.96
  -3  -6   2   80.50    2.81
   3   6   2   81.44    2.96
  -6   3   2   78.01    2.97
   6  -3   2   77.44    2.89
   3   6   2   81.92    2.98
  -3  -6   2   81.77    2.95
  -6   3   2   75.93    2.95
   6  -3   2   76.84    2.96
  -3  -6   2   79.33    2.96
   6  -3   2   75.75    2.97
   4   6  -2   48.31    1.86
  -4  -6  -2   48.74    1.86
  -4  -6  -2   48.17    1.79
   6  -4  -2   46.33    1.85
   4   6  -2   48.38    1.85
   4   6  -2   49.18    1.75
  -6   4  -2   46.90    1.85
  -4  -6  -2   49.85    1.85
  -6   4  -2   47.39    1.87
   6  -4  -2   46.90    1.87
   6  -4   2   48.87    1.82
  -6   4   2   48.93    1.84
  -4  -6   2   47.45    1.84
   4   6   2   47.70    1.79
  -4  -6   2   47.06    1.74
  -6   4   2   50.76    1.87
  -4  -6   2   46.51    1.85
   4   6   2   46.23    1.84
   6  -4   2   49.99    1.86
   6  -4   2   48.03    1.87
   4   6   2   46.33    1.86
   5   6  -2   13.93    0.64
   6  -5  -2   13.51    0.64
  -6   5  -2   13.96    0.67
  -5  -6  -2   14.68    0.65
   5   6  -2   14.61    0.59
  -6   5  -2   13.43    0.64
  -5  -6  -2   14.65    0.64
   6  -5  -2   13.43    0.67
  -5  -6  -2   13.74    0.65
   5   6  -2   14.31    0.66
   6  -5   2   14.09    0.67
   5   6   2   13.58    0.63
  -5  -6   2   14.33    0.64
   5   6   2   13.36    0.65
  -5  -6   2   13.71    0.64
   6  -5   2   14.61    0.65
  -5  -6   2   13.63    0.59
  -6   5   2   14.09    0.64
  -6   5   2   14.10    0.66
   6  -5   2   14.39    0.67
   5   6   2   14.01    0.63
  -6  -6  -2   35.93    1.44
  -6   6  -2   38.49    1.49
   6  -6  -2   37.44    1.52
   6   6  -2   36.18    1.40
   6   6  -2   36.73    1.50
  -6   6  -2   36.74    1.51
   6  -6  -2   38.22    1.49
   6   6  -2   36.69    1.48
  -6  -6  -2   37.04    1.48
  -6  -6  -2   37.10    1.50
  -6   6   2   37.95    1.51
   6  -6   2   37.40    1.48
   6   6   2   37.59    1.48
  -6   6   2   36.74    1.48
  -6  -6   2   37.61    1.49
   6  -6   2   36.69    1.47
  -6  -6   2   37.50    1.41
   6   6   2   38.52    1.44
   6  -6   2   36.17    1.51
   6   6   2   37.30    1.50
  -6  -6   2   39.33    1.48
  -6   7  -2   16.65    0.80
   7   6  -2   16.40    0.71
  -7  -6  -2   15.17    0.76
  -6   7  -2   17.80    0.78
   6  -7  -2   17.78    0.77
   7   6  -2   15.87    0.76
   6  -7  -2   16.79    0.80
  -7  -6  -2   16.32    0.76
   7   6  -2   15.77    0.77
  -7  -6  -2   16.43    0.76
  -7  -6   2   17.37    0.73
   6  -7   2   16.68    0.79
  -7  -6   2   17.37    0.77
  -6   7   2   17.08    0.77
  -6   7   2   17.62    0.80
   6  -7   2   16.14    0.78
   7   6   2   18.27    0.76
  -7  -6   2   17.03    0.76
   6  -7   2   15.72    0.75
   7   6   2   17.93    0.79
   7   6   2   16.81    0.76
  -6   7   2   16.78    0.79
   5  -7  -2    8.33    0.45
   7   5  -2    8.18    0.46
  -5   7  -2    7.69    0.47
  -5   7  -2    7.78    0.45
  -7  -5  -2    7.68    0.46
   5  -7  -2    7.55    0.47
  -7  -5  -2    7.97    0.44
  -7  -5  -2    7.54    0.45
   7   5  -2    7.50    0.41
   7   5   2    8.14    0.46
  -5   7   2    7.73    0.47
   7   5   2    8.31    0.44
  -7  -5   2    8.21    0.43
  -7  -5   2    7.70    0.44
   5  -7   2    7.38    0.46
   5  -7   2    8.58    0.47
  -5   7   2    7.24    0.46
   5  -7   2    7.70    0.44
   7   5   2    7.62    0.44
  -5   7   2    7.76    0.44
  -7  -5   2    7.90    0.44
  -4   7  -2    5.15    0.38
  -7  -4  -2    4.91    0.36
   7   4  -2    4.90    0.35
   7   4  -2    4.87    0.34
  -4   7  -2    5.14    0.35
   4  -7  -2    5.45    0.35
   7   4  -2    4.33    0.31
  -7  -4  -2    4.88    0.36
   4  -7  -2    5.74    0.38
  -7  -4  -2    4.83    0.34
  -4   7   2    4.92    0.37
   4  -7   2    5.07    0.37
  -7  -4   2    5.40    0.35
   4  -7   2    5.12    0.36
  -4   7   2    5.00    0.34
  -7  -4   2    5.21    0.35
  -7  -4   2    5.12    0.34
  -4   7   2    5.11    0.37
   7   4   2    5.49    0.35
   7   4   2    5.24    0.34
  -7  -3  -2   14.15    0.64
  -7  -3  -2   13.64    0.63
  -3   7  -2   13.39    0.62
   3  -7  -2   13.81    0.65
  -7  -3  -2   13.90    0.63
   3  -7  -2   13.64    0.62
   7   3  -2   13.67    0.62
  -3   7  -2   13.77    0.65
   7   3  -2   13.18    0.60
  -3   7   2   14.28    0.65
   3  -7   2   13.64    0.63
   7   3   2   13.18    0.63
  -3   7   2   13.88    0.64
  -7  -3   2   13.85    0.62
   7   3   2   13.05    0.62
   7   3   2   13.38    0.62
  -7  -3   2   13.90    0.62
  -3   7   2   13.13    0.62
   3  -7   2   13.18    0.64
  -7  -3   2   13.81    0.62
   2  -7  -2    6.13    0.38
  -2   7  -2    5.97    0.37
   2  -7  -2    5.56    0.34
   7   2  -2    5.48    0.34
  -7  -2  -2    5.16    0.35
   7   2  -2    5.60    0.34
   7   2  -2    5.46    0.35
  -7  -2  -2    5.12    0.36
   2  -7  -2    6.16    0.35
  -7  -2  -2    5.28    0.34
   2  -7   2    5.64    0.36
   2  -7   2    5.70    0.35
  -2   7   2    5.30    0.34
   7   2   2    5.90    0.35
  -2   7   2    5.58    0.35
  -2   7   2    5.57    0.37
  -7  -2   2    6.45    0.37
  -7  -2   2    5.68    0.35
  -7  -2   2    6.20    0.34
   7   2   2    6.17    0.35
   1  -7  -2   22.75    0.94
  -7  -1  -2   23.77    0.95
  -7  -1  -2   23.31    0.95
   7   1  -2   22.10    0.94
  -1   7  -2   22.37    0.96
   7   1  -2   23.38    0.93
  -1   7  -2   22.62    0.94
   1  -7  -2   23.18    0.94
  -7  -1  -2   22.55    0.95
  -1   7  -2   22.68    0.89
  -1   7   2   23.23    0.93
   7   1   2   22.82    0.94
  -1   7   2   23.17    0.96
   7   1   2   21.95    0.94
   7   1   2   23.37    0.94
  -7  -1   2   22.84    0.95
   1  -7   2   22.49    0.96
  -1   7   2   22.08    0.94
  -7  -1   2   22.60    0.94
   1  -7   2   23.34    0.94
  -7  -1   2   22.99    0.94
   0  -7  -2    0.83    0.17
   0   7  -2    1.07    0.17
   0  -7  -2    1.01    0.16
  -7   0  -2    0.99    0.18
   0   7  -2    0.99    0.13
   0  -7  -2    1.02    0.16
   7   0  -2    0.76    0.15
  -7   0  -2    0.69    0.15
  -7   0  -2    1.07    0.18
   0   7  -2    0.83    0.15
   7   0  -2    1.11    0.18
   7   0  -2    1.08    0.20
  -7   0   2    0.71    0.15
   0  -7   2    0.94    0.17
  -7   0   2    0.97    0.16
   7   0   2    0.69    0.15
   0   7   2    1.04    0.17
   7   0   2    1.26    0.18
   0   7   2    0.95    0.19
   7   0   2    0.85    0.18
   0  -7   2    1.02    0.16
  -7   0   2    0.96    0.20
   0   7   2    0.87    0.15
  -1  -7  -2   22.76    0.97
  -7   1  -2   23.22    0.96
   7  -1  -2   22.54    0.95
  -1  -7  -2   22.86    0.93
  -1  -7  -2   22.92    0.94
  -7   1  -2   23.43    0.96
   7  -1  -2   22.86    0.96
  -7   1  -2   22.93    0.95
   1   7  -2   23.10    0.87
   1   7  -2   23.85    0.94
   1   7  -2   22.94    0.96
   7  -1  -2   22.92    0.95
   1   7   2   23.14    0.97
   7  -1   2   21.78    0.94
   1   7   2   22.79    0.94
   1   7   2   23.12    0.93
  -1  -7   2   23.02    0.96
  -7   1   2   22.80    0.94
   7  -1   2   23.55    0.96
   7  -1   2   22.80    0.96
  -7   1   2   23.14    0.94
  -2  -7  -2    5.88    0.33
   7  -2  -2    6.08    0.36
  -7   2  -2    5.52    0.34
  -2  -7  -2    5.26    0.36
  -2  -7  -2    5.64    0.34
   7  -2  -2    5.61    0.37
  -7   2  -2    5.70    0.39
   7  -2  -2    5.73    0.36
  -2  -7  -2    5.35    0.33
  -7   2  -2    5.93    0.37
   2   7  -2    5.33    0.36
   7  -2   2    5.56    0.35
   2   7   2    6.28    0.34
   2   7   2    5.77    0.37
  -2  -7   2    5.57    0.28
  -7   2   2    5.32    0.36
   7  -2   2    5.62    0.37
  -7   2   2    5.55    0.34
  -2  -7   2    5.91    0.24
  -2  -7   2    5.81    0.35
  -2  -7   2    6.02    0.34
   7  -2   2    5.40    0.36
  -7   3  -2   13.81    0.64
   7  -3  -2   13.79    0.63
   3   7  -2   13.69    0.62
  -7   3  -2   13.30    0.63
   3   7  -2   13.93    0.64
  -7   3  -2   14.22    0.66
   7  -3  -2   13.83    0.67
   7  -3  -2   12.92    0.64
  -3  -7  -2   13.75    0.61
  -3  -7  -2   13.94    0.61
  -3  -7  -2   13.59    0.62
  -3  -7  -2   13.54    0.64
   7  -3   2   13.69    0.63
   3   7   2   13.99    0.62
  -3  -7   2   13.04    0.63
  -7   3   2   14.01    0.64
   7  -3   2   14.24    0.66
  -3  -7   2   13.62    0.53
  -3  -7   2   13.01    0.55
  -7   3   2   14.17    0.63
  -3  -7   2   13.55    0.61
   7  -3   2   13.56    0.64
   3   7   2   13.78    0.64
  -4  -7  -2    4.82    0.34
   7  -4  -2    5.06    0.41
  -7   4  -2    5.01    0.36
  -4  -7  -2    4.89    0.33
   7  -4  -2    5.18    0.37
  -4  -7  -2    4.97    0.35
  -7   4  -2    5.39    0.37
   4   7  -2    5.02    0.34
   4   7  -2    5.08    0.36
   7  -4  -2    5.37    0.36
   7  -4   2    4.80    0.37
   7  -4   2    4.88    0.34
  -4  -7   2    5.13    0.34
  -4  -7   2    5.27    0.35
   7  -4   2    5.02    0.38
   4   7   2    5.76    0.35
   4   7   2    5.31    0.37
  -7   4   2    4.99    0.36
  -7   4   2    4.90    0.34
  -4  -7   2    5.07    0.29
   7  -5  -2    7.90    0.45
  -5  -7  -2    8.19    0.44
  -5  -7  -2    7.83    0.44
   5   7  -2    7.47    0.45
  -7   5  -2    7.99    0.46
  -5  -7  -2    7.34    0.46
  -7   5  -2    7.77    0.47
   7  -5  -2    7.89    0.48
   5   7  -2    7.70    0.38
   5   7  -2    7.50    0.44
   5   7   2    7.31    0.42
  -5  -7   2    7.47    0.44
  -7   5   2    7.85    0.45
   5   7   2    8.08    0.44
   7  -5   2    8.14    0.48
  -5  -7   2    7.67    0.42
  -5  -7   2    7.60    0.39
   7  -5   2    7.61    0.47
   7  -5   2    7.54    0.44
  -7   5   2    7.62    0.44
   5   7   2    8.27    0.46
   6   7  -2   16.37    0.75
  -7   6  -2   16.72    0.76
  -6  -7  -2   16.36    0.78
  -6  -7  -2   16.59    0.74
   7  -6  -2   17.54    0.77
  -7   6  -2   16.99    0.79
  -6  -7  -2   16.48    0.76
   6   7  -2   16.38    0.70
   6   7  -2   16.62    0.77
   7  -6  -2   16.42    0.79
  -6  -7   2   16.93    0.71
   7  -6   2   16.62    0.76
  -7   6   2   16.47    0.78
   6   7   2   16.74    0.74
  -6  -7   2   17.38    0.77
   6   7   2   16.97    0.76
  -7   6   2   16.22    0.75
   6   7   2   16.80    0.78
   7  -6   2   15.55    0.78
  -6  -7   2   17.51    0.76
   7  -6   2   16.38    0.78
   7   7  -2   30.09    1.23
   7   7  -2   30.25    1.16
  -7   7  -2   28.56    1.23
  -7  -7  -2   30.72    1.25
  -7  -7  -2   30.73    1.23
   7  -7  -2   28.52    1.23
  -7  -7  -2   29.57    1.20
   7   7  -2   29.45    1.24
   7  -7  -2   29.99    1.27
  -7   7  -2   28.69    1.26
  -7  -7   2   28.79    1.23
  -7   7   2   30.38    1.26
  -7  -7   2   29.38    1.22
   7  -7   2   29.79    1.26
  -7  -7   2   29.41    1.17
   7  -7   2   29.79    1.23
   7  -7   2   30.36    1.24
  -7   7   2   30.82    1.23
   7   7   2   30.07    1.20
   7   7   2   27.95    1.22
   7   7   2   28.30    1.24
  -7   8  -2    7.85    0.51
  -8  -7  -2    8.16    0.48
  -7   8  -2    8.15    0.49
   8   7  -2    7.83    0.49
  -8  -7  -2    7.31    0.48
   8   7  -2    7.88    0.43
   7  -8  -2    7.36    0.50
  -8  -7  -2    7.19    0.47
   8   7  -2    6.93    0.46
   7  -8  -2    7.95    0.48
  -8  -7   2    8.01    0.47
   8   7   2    8.29    0.47
   8   7   2    7.71    0.47
   7  -8   2    7.77    0.51
   8   7   2    7.65    0.49
  -7   8   2    8.03    0.50
   7  -8   2    6.49    0.49
  -8  -7   2    8.63    0.49
  -7   8   2    7.96    0.51
  -7   8   2    7.52    0.47
  -8  -7   2    8.35    0.46
   7  -8   2    7.47    0.47
  -8  -6  -2    4.95    0.38
  -8  -6  -2    4.19    0.35
   6  -8  -2    4.31    0.39
  -8  -6  -2    4.40    0.37
   6  -8  -2    4.87    0.36
  -6   8  -2    3.96    0.35
   8   6  -2    4.44    0.32
   8   6  -2    4.39    0.34
   8   6  -2    4.46    0.35
  -6   8  -2    4.33    0.39
  -8  -6   2    4.26    0.34
  -6   8   2    4.54    0.39
   8   6   2    4.73    0.36
   8   6   2    4.26    0.37
  -8  -6   2    4.35    0.34
   8   6   2    4.41    0.35
  -8  -6   2    4.79    0.37
   6  -8   2    4.18    0.38
  -6   8   2    4.53    0.35
   6  -8   2    4.59    0.39
   6  -8   2    5.01    0.39
  -6   8   2    4.39    0.39
   5  -8  -2   35.16    1.40
   8   5  -2   35.12    1.40
  -5   8  -2   33.78    1.39
   8   5  -2   32.93    1.39
  -8  -5  -2   33.74    1.40
   8   5  -2   34.17    1.33
  -8  -5  -2   33.57    1.39
   5  -8  -2   35.06    1.43
  -8  -5  -2   34.30    1.37
  -5   8  -2   33.01    1.42
   8   5   2   33.47    1.35
   5  -8   2   35.30    1.39
  -8  -5   2   34.33    1.38
  -5   8   2   35.64    1.42
   5  -8   2   34.35    1.37
   8   5   2   32.87    1.39
  -8  -5   2   33.71    1.39
  -5   8   2   34.45    1.38
  -8  -5   2   34.74    1.35
  -5   8   2   34.46    1.41
   8   5   2   34.89    1.41
   5  -8   2   34.97    1.42
  -4   8  -2    9.77    0.54
  -8  -4  -2   10.88    0.56
   8   4  -2   10.58    0.54
   8   4  -2   11.05    0.55
  -4   8  -2   10.06    0.56
  -8  -4  -2   11.19    0.54
   8   4  -2   10.28    0.52
   4  -8  -2    9.95    0.57
  -8  -4  -2   10.43    0.54
   4  -8  -2   10.23    0.54
   8   4   2    9.80    0.53
  -8  -4   2    9.67    0.53
  -4   8   2   11.33    0.54
  -8  -4   2   10.41    0.53
   4  -8   2   11.07    0.54
  -8  -4   2    9.76    0.53
   8   4   2   10.17    0.54
  -4   8   2   10.05    0.56
   8   4   2   10.08    0.53
  -4   8   2   11.53    0.57
   4  -8   2   10.75    0.57
   8   3  -2   10.32    0.53
  -3   8  -2    9.85    0.56
   8   3  -2   10.60    0.54
  -8  -3  -2   10.08    0.54
   8   3  -2   10.62    0.52
   3  -8  -2   10.48    0.53
  -3   8  -2   10.24    0.54
   3  -8  -2   10.62    0.57
  -8  -3  -2   10.82    0.54
  -8  -3  -2   10.91    0.56
   8   3   2   10.72    0.53
   8   3   2   10.31    0.53
  -3   8   2   10.97    0.53
  -3   8   2    9.62    0.54
  -3   8   2    9.96    0.55
   8   3   2   10.48    0.54
  -8  -3   2   10.26    0.53
  -8  -3   2   10.39    0.52
   3  -8   2   10.89    0.56
   3  -8   2   10.90    0.53
  -8  -3   2    9.87    0.54
  -8  -2  -2    1.18    0.19
   8   2  -2    1.02    0.18
   8   2  -2    1.16    0.18
  -2   8  -2    1.28    0.20
   8   2  -2    1.08    0.18
  -2   8  -2    1.22    0.16
  -8  -2  -2    1.07    0.20
   2  -8  -2    1.06    0.19
   2  -8  -2    1.05    0.21
  -8  -2  -2    1.47    0.23
  -2   8  -2    0.71    0.19
  -2   8   2    1.58    0.22
   2  -8   2    1.17    0.20
   2  -8   2    1.61    0.22
  -8  -2   2    1.45    0.19
   8   2   2    0.95    0.18
   8   2   2    1.16    0.20
  -2   8   2    1.21    0.18
  -2   8   2    1.49    0.23
  -8  -2   2    1.21    0.20
  -8  -2   2    1.09    0.19
   8   2   2    0.83    0.17
   1  -8  -2   59.14    2.20
   1  -8  -2   59.83    2.19
   8   1  -2   56.74    2.14
  -8  -1  -2   56.15    2.20
  -1   8  -2   57.92    2.22
   8   1  -2   54.46    2.20
   8   1  -2   57.16    2.20
  -1   8  -2   55.95    2.19
  -8  -1  -2   55.69    2.16
   1  -8  -2   59.02    2.23
  -8  -1  -2   56.00    2.20
  -1   8  -2   57.90    2.14
  -8  -1   2   58.45    2.20
  -1   8   2   55.67    2.19
   1  -8   2   55.44    2.21
  -1   8   2   54.99    2.19
  -8  -1   2   59.76    2.17
   8   1   2   59.02    2.21
   8   1   2   59.04    2.16
  -1   8   2   56.71    2.22
  -8  -1   2   60.27    2.20
   8   1   2   58.36    2.20
   1  -8   2   54.07    2.18
  -8   0  -2   -0.08    0.14
   8   0  -2    0.08    0.15
   0  -8  -2   -0.10    0.12
   8   0  -2   -0.11    0.13
   0   8  -2    0.00    0.15
   8   0  -2    0.08    0.14
  -8   0  -2   -0.05    0.15
   0   8  -2    0.01    0.08
   0  -8  -2   -0.12    0.13
   0   8  -2    0.05    0.14
  -8   0  -2   -0.05    0.15
   0  -8  -2    0.00    0.15
   0   8   2    0.03    0.14
   0  -8   2   -0.20    0.14
   0   8   2   -0.19    0.15
  -8   0   2    0.18    0.17
  -8   0   2   -0.14    0.14
   8   0   2   -0.14    0.13
   0  -8   2    0.03    0.14
  -8   0   2    0.14    0.13
   0   8   2    0.03    0.14
   8   0   2    0.04    0.15
   8   0   2   -0.06    0.15
  -1  -8  -2   56.46    2.18
  -1  -8  -2   55.61    2.17
   1   8  -2   55.68    2.11
  -1  -8  -2   56.14    2.21
  -8   1  -2   55.52    2.16
   8  -1  -2   58.84    2.21
   8  -1  -2   58.52    2.16
   1   8  -2   53.59    2.20
  -8   1  -2   59.93    2.21
   1   8  -2   54.26    2.18
   8  -1  -2   60.56    2.20
  -8   1  -2   57.14    2.19
   8  -1   2   56.84    2.16
  -8   1   2   56.03    2.18
  -1  -8   2   58.98    2.18
   8  -1   2   55.27    2.19
   8  -1   2   54.10    2.20
   1   8   2   59.22    2.22
  -1  -8   2   57.09    2.20
   1   8   2   59.07    2.18
   1   8   2   59.88    2.19
  -8   1   2   56.32    2.19
  -8   2  -2    1.13    0.21
   8  -2  -2    1.34    0.20
  -2  -8  -2    1.35    0.21
  -2  -8  -2    1.18    0.18
  -2  -8  -2    1.14    0.17
  -8   2  -2    1.04    0.23
  -8   2  -2    1.40    0.21
   8  -2  -2    1.34    0.23
  -2  -8  -2    1.31    0.19
   8  -2  -2    1.10    0.19
   2   8  -2    1.72    0.23
  -2  -8   2    1.12    0.18
   2   8   2    1.27    0.21
  -8   2   2    1.55    0.21
  -8   2   2    1.79    0.21
   8  -2   2    1.46    0.20
   8  -2   2    1.15    0.20
  -2  -8   2    1.31    0.15
   8  -2   2    1.36    0.23
  -2  -8   2    1.30    0.21
   2   8   2    0.94    0.17
  -8   3  -2   10.22    0.54
  -3  -8  -2   10.80    0.52
   3   8  -2   10.71    0.54
   3   8  -2   10.75    0.55
  -8   3  -2    9.86    0.58
  -3  -8  -2   10.31    0.51
   8  -3  -2   10.54    0.58
   8  -3  -2   10.28    0.54
  -3  -8  -2   10.64    0.56
  -3  -8  -2   10.86    0.53
  -8   3  -2   10.68    0.55
   8  -3  -2   10.41    0.56
  -3  -8   2   10.17    0.54
   3   8   2   10.37    0.55
  -3  -8   2   10.07    0.46
  -3  -8   2   11.14    0.53
  -8   3   2   11.07    0.54
   8  -3   2   11.43    0.57
  -3  -8   2    9.89    0.42
   8  -3   2   10.74    0.54
  -8   3   2   10.59    0.54
   8  -3   2   10.52    0.57
   3   8   2   10.04    0.52
  -8   4  -2    8.92    0.55
  -4  -8  -2   11.04    0.52
  -8   4  -2    8.83    0.53
   8  -4  -2    9.79    0.54
  -4  -8  -2   10.32    0.53
   4   8  -2   10.54    0.55
   8  -4  -2    9.94    0.56
   8  -4  -2    9.56    0.53
  -4  -8  -2   10.81    0.53
  -4  -8  -2   11.04    0.51
  -8   4  -2    9.48    0.53
   8  -4   2   11.15    0.57
   4   8   2   10.35    0.52
   4   8   2    9.36    0.53
   8  -4   2   10.08    0.55
  -8   4   2   10.00    0.52
  -4  -8   2    9.67    0.46
   8  -4   2   10.74    0.53
  -4  -8   2    9.90    0.51
  -4  -8   2    9.71    0.52
  -4  -8   2    9.33    0.42
  -8   4   2   10.55    0.54
   5   8  -2   33.58    1.38
  -5  -8  -2   35.48    1.41
   5   8  -2   35.08    1.40
  -8   5  -2   34.24    1.39
   8  -5  -2   35.21    1.41
   8  -5  -2   34.53    1.42
  -5  -8  -2   33.26    1.38
  -5  -8  -2   34.53    1.34
  -8   5  -2   32.66    1.41
   8  -5  -2   34.22    1.39
   8  -5   2   34.13    1.41
  -5  -8   2   33.68    1.29
   8  -5   2   34.95    1.39
  -8   5   2   34.57    1.40
   5   8   2   33.75    1.40
   8  -5   2   33.52    1.38
  -8   5   2   34.36    1.38
  -5  -8   2   34.37    1.39
   5   8   2   31.50    1.37
  -5  -8   2   33.93    1.37
  -6  -8  -2    4.46    0.38
  -6  -8  -2    4.24    0.35
   6   8  -2    4.66    0.35
  -6  -8  -2    4.38    0.35
  -8   6  -2    3.72    0.36
   6   8  -2    4.36    0.31
   6   8  -2    4.49    0.37
   8  -6  -2    4.29    0.39
   8  -6  -2    4.50    0.36
  -8   6  -2    3.49    0.34
   8  -6   2    4.20    0.38
  -8   6   2    4.34    0.36
  -6  -8   2    4.15    0.31
   8  -6   2    4.58    0.36
   6   8   2    4.41    0.38
   6   8   2    4.39    0.34
   8  -6   2    5.07    0.41
   6   8   2    4.36    0.36
  -8   6   2    4.35    0.37
  -6  -8   2    4.38    0.38
   8  -7  -2    8.20    0.48
   7   8  -2    7.60    0.43
   8  -7  -2    8.09    0.52
   7   8  -2    7.53    0.47
  -8   7  -2    8.51    0.53
  -7  -8  -2    7.87    0.48
  -7  -8  -2    7.64    0.48
  -8   7  -2    8.21    0.49
   7   8  -2    7.74    0.49
  -7  -8  -2    7.73    0.50
   8  -7   2    7.45    0.49
  -7  -8   2    8.09    0.47
   7   8   2    7.99    0.47
   8  -7   2    7.37    0.52
   7   8   2    8.30    0.51
   8  -7   2    8.47    0.53
  -7  -8   2    8.77    0.50
  -7  -8   2    7.89    0.45
   7   8   2    8.30    0.47
  -8   7   2    7.71    0.51
  -8   7   2    7.69    0.48
   8   8  -2   10.58    0.60
   8  -8  -2   11.05    0.63
   8   8  -2   10.37    0.58
  -8  -8  -2   10.64    0.59
  -8  -8  -2   10.65    0.58
   8   8  -2   10.47    0.55
  -8  -8  -2   10.46    0.60
   8  -8  -2   11.42    0.59
  -8   8  -2   10.87    0.62
  -8   8  -2   11.11    0.59
   8   8   2   10.38    0.58
  -8  -8   2   11.42    0.60
   8  -8   2   10.26    0.58
  -8  -8   2   10.94    0.56
   8   8   2   10.55    0.57
   8  -8   2   10.08    0.62
   8  -8   2   10.75    0.62
   8   8   2   10.95    0.61
  -8  -8   2   11.01    0.58
  -8   8   2   11.01    0.60
  -8   8   2   10.47    0.61
  -9  -8  -2    1.55    0.27
  -8   9  -2    1.52    0.27
   8  -9  -2    1.18    0.23
  -9  -8  -2    1.40    0.25
   9   8  -2    1.09    0.23
  -8   9  -2    1.14    0.23
   9   8  -2    1.41    0.22
  -9  -8  -2    1.40    0.24
   8  -9  -2    1.11    0.26
   9   8  -2    1.44    0.24
  -8   9   2    0.82    0.22
   9   8   2    1.18    0.22
   8  -9   2    1.59    0.26
  -8   9   2    0.90    0.24
  -9  -8   2    1.25    0.23
  -8   9   2    0.92    0.24
   8  -9   2    1.12    0.28
   9   8   2    1.33    0.26
   8  -9   2    1.01    0.26
  -9  -8   2    1.33    0.23
  -9  -8   2    1.23    0.23
   9   8   2    0.68    0.21
  -9  -7  -2    7.98    0.50
   9   7  -2    8.01    0.52
   9   7  -2    8.12    0.46
   9   7  -2    8.35    0.50
  -9  -7  -2    8.07    0.51
  -9  -7  -2    8.18    0.51
   7  -9  -2    8.35    0.54
  -7   9  -2    8.09    0.54
  -7   9  -2    8.31    0.50
   7  -9  -2    8.99    0.52
   9   7   2    8.01    0.49
  -9  -7   2    7.90    0.51
  -7   9   2    8.27    0.50
  -9  -7   2    8.73    0.50
   7  -9   2    8.72    0.51
   9   7   2    8.12    0.51
  -7   9   2    7.91    0.54
  -9  -7   2    7.92    0.49
   9   7   2    7.47    0.49
  -7   9   2    8.04    0.52
   7  -9   2    7.44    0.52
   7  -9   2    7.57    0.53
   9   6  -2   18.73    0.82
  -9  -6  -2   18.96    0.86
   6  -9  -2   17.91    0.86
   6  -9  -2   17.94    0.89
   9   6  -2   18.46    0.86
  -6   9  -2   18.80    0.86
  -9  -6  -2   18.87    0.85
  -9  -6  -2   20.85    0.89
   9   6  -2   19.33    0.87
  -6   9  -2   18.57    0.90
  -9  -6   2   18.04    0.84
   6  -9   2   19.80    0.86
  -6   9   2   18.87    0.88
   9   6   2   18.08    0.86
   9   6   2   17.61    0.87
  -9  -6   2   18.06    0.85
   9   6   2   17.75    0.83
  -9  -6   2   17.42    0.83
   6  -9   2   19.11    0.90
  -6   9   2   19.69    0.90
   6  -9   2   19.94    0.89
  -6   9   2   19.57    0.86
  -9  -5  -2   18.98    0.85
  -5   9  -2   18.32    0.84
   9   5  -2   18.16    0.80
   5  -9  -2   18.55    0.83
  -9  -5  -2   17.49    0.83
   5  -9  -2   18.60    0.88
  -5   9  -2   18.26    0.87
   9   5  -2   19.19    0.85
   9   5  -2   18.05    0.83
  -9  -5  -2   17.08    0.83
  -9  -5   2   19.31    0.84
  -9  -5   2   17.98    0.82
   9   5   2   17.59    0.81
  -9  -5   2   18.51    0.82
  -5   9   2   16.60    0.85
   5  -9   2   18.29    0.87
   5  -9   2   18.52    0.83
   9   5   2   19.28    0.85
  -5   9   2   18.68    0.85
   9   5   2   18.20    0.84
  -5   9   2   19.02    0.83
  -4   9  -2   15.66    0.70
   4  -9  -2   15.48    0.70
  -4   9  -2   15.60    0.74
   9   4  -2   13.79    0.67
  -9  -4  -2   14.67    0.71
   9   4  -2   13.57    0.69
   9   4  -2   14.13    0.70
   4  -9  -2   14.80    0.73
  -9  -4  -2   13.74    0.70
  -9  -4  -2   12.99    0.68
  -9  -4   2   14.59    0.68
   4  -9   2   14.39    0.69
  -4   9   2   13.92    0.68
  -9  -4   2   15.39    0.70
   9   4   2   16.40    0.72
  -4   9   2   14.02    0.72
   9   4   2   14.98    0.70
   9   4   2   16.28    0.71
  -4   9   2   14.15    0.71
   4  -9   2   14.54    0.72
  -9  -4   2   15.18    0.70
   3  -9  -2    7.05    0.47
  -9  -3  -2    6.65    0.42
   3  -9  -2    6.82    0.42
  -9  -3  -2    6.66    0.43
   9   3  -2    6.80    0.42
  -3   9  -2    6.93    0.38
   9   3  -2    6.23    0.41
   9   3  -2    6.28    0.41
  -3   9  -2    6.78    0.42
  -3   9  -2    6.89    0.46
  -9  -3  -2    6.74    0.44
  -3   9   2    6.42    0.45
   9   3   2    6.26    0.42
   3  -9   2    6.69    0.45
  -3   9   2    6.77    0.42
   9   3   2    6.43    0.43
  -9  -3   2    6.89    0.44
  -3   9   2    7.16    0.42
   3  -9   2    6.97    0.42
   9   3   2    6.15    0.41
  -9  -3   2    6.66    0.40
  -9  -3   2    7.05    0.44
   2  -9  -2    6.70    0.40
   9   2  -2    6.13    0.39
   9   2  -2    5.64    0.39
   2  -9  -2    6.25    0.43
   9   2  -2    6.16    0.40
  -2   9  -2    6.14    0.43
  -9  -2  -2    5.70    0.38
  -2   9  -2    6.13    0.35
  -9  -2  -2    5.78    0.42
  -9  -2  -2    6.25    0.40
   2  -9   2    6.55    0.40
  -9  -2   2    6.55    0.41
  -2   9   2    5.73    0.39
  -2   9   2    6.26    0.39
   2  -9   2    5.80    0.41
  -9  -2   2    6.52    0.43
  -2   9   2    6.22    0.44
   9   2   2    6.08    0.41
   9   2   2    6.74    0.40
   9   2   2    6.01    0.41
  -9  -2   2    6.61    0.39
  -9  -1  -2    6.70    0.43
  -9  -1  -2    6.73    0.43
   1  -9  -2    6.81    0.45
  -1   9  -2    6.63    0.42
   9   1  -2    6.61    0.42
   1  -9  -2    7.11    0.41
  -1   9  -2    7.43    0.46
  -1   9  -2    6.95    0.35
   9   1  -2    6.97    0.44
   1  -9  -2    6.78    0.41
  -9  -1  -2    6.14    0.44
   9   1  -2    7.09    0.42
   1  -9   2    6.57    0.40
  -1   9   2    6.61    0.44
  -9  -1   2    7.22    0.41
  -1   9   2    6.80    0.41
   9   1   2    6.68    0.41
  -9  -1   2    7.06    0.46
  -1   9   2    6.97    0.41
   9   1   2    7.17    0.43
   9   1   2    6.78    0.44
   1  -9   2    7.20    0.44
   9   0  -2   18.83    0.82
   0  -9  -2   18.70    0.84
   0  -9  -2   17.57    0.79
   0  -9  -2   18.67    0.81
   0   9  -2   18.54    0.80
  -9   0  -2   18.04    0.82
   0   9  -2   17.73    0.73
   0   9  -2   18.31    0.83
   9   0  -2   18.29    0.82
   9   0  -2   17.95    0.81
  -9   0  -2   17.43    0.82
  -9   0  -2   18.51    0.82
   0   9   2   18.09    0.80
   0   9   2   17.73    0.83
   0  -9   2   17.76    0.79
   9   0   2   17.91    0.81
  -9   0   2   18.09    0.83
  -9   0   2   18.70    0.81
   0  -9   2   18.28    0.82
  -9   0   2   18.20    0.81
   0   9   2   17.67    0.79
   9   0   2   18.17    0.82
   9  -1  -2    7.16    0.44
  -1  -9  -2    6.57    0.41
   1   9  -2    6.88    0.44
   1   9  -2    6.62    0.41
  -1  -9  -2    6.48    0.39
  -9   1  -2    6.10    0.45
   1   9  -2    6.44    0.31
   9  -1  -2    6.85    0.42
  -1  -9  -2    7.02    0.45
  -9   1  -2    7.09    0.43
  -9   1  -2    6.73    0.43
   9  -1  -2    7.22    0.45
   1   9   2    7.27    0.41
  -9   1   2    6.86    0.41
   9  -1   2    7.15    0.42
  -9   1   2    6.93    0.42
  -1  -9   2    7.10    0.44
   1   9   2    6.66    0.40
   9  -1   2    6.72    0.43
  -1  -9   2    6.68    0.41
   1   9   2    7.09    0.44
   9  -1   2    6.51    0.44
   9  -2  -2    6.34    0.42
  -2  -9  -2    6.01    0.43
  -9   2  -2    6.19    0.46
  -9   2  -2    6.40    0.42
  -2  -9  -2    6.00    0.39
  -9   2  -2    6.12    0.41
  -2  -9  -2    5.88    0.37
  -2  -9  -2    6.36    0.39
   2   9  -2    6.26    0.42
   9  -2  -2    6.41    0.44
   2   9  -2    5.96    0.40
   9  -2  -2    6.74    0.41
  -2  -9   2    6.69    0.34
   2   9   2    6.39    0.42
  -2  -9   2    6.58    0.41
   9  -2   2    6.16    0.45
   9  -2   2    6.26    0.40
   2   9   2    6.23    0.40
   9  -2   2    5.78    0.42
  -2  -9   2    6.59    0.42
  -9   2   2    5.75    0.40
  -9   2   2    6.16    0.40
  -9   3  -2    6.95    0.43
  -9   3  -2    6.48    0.43
  -3  -9  -2    7.10    0.42
  -3  -9  -2    6.18    0.38
   3   9  -2    6.29    0.41
  -3  -9  -2    6.99    0.40
   3   9  -2    6.34    0.43
  -3  -9  -2    6.41    0.44
   9  -3  -2    6.34    0.43
   9  -3  -2    5.84    0.41
  -9   3  -2    6.61    0.48
   9  -3  -2    6.71    0.46
  -3  -9   2    5.84    0.42
  -3  -9   2    6.68    0.35
  -3  -9   2    6.77    0.29
   9  -3   2    6.78    0.42
  -9   3   2    6.36    0.42
   9  -3   2    6.73    0.44
  -3  -9   2    6.42    0.40
   3   9   2    5.86    0.40
  -9   3   2    6.64    0.42
   9  -3   2    6.20    0.43
   3   9   2    6.93    0.44
   4   9  -2   14.24    0.69
  -4  -9  -2   14.32    0.69
  -9   4  -2   15.11    0.75
  -4  -9  -2   14.22    0.67
   9  -4  -2   15.70    0.74
  -9   4  -2   15.32    0.71
   9  -4  -2   15.04    0.73
   9  -4  -2   15.00    0.70
  -4  -9  -2   14.16    0.67
   4   9  -2   14.02    0.71
  -4  -9  -2   13.44    0.70
  -9   4  -2   15.06    0.73
   4   9   2   15.76    0.73
   9  -4   2   13.65    0.72
  -4  -9   2   14.86    0.71
  -9   4   2   13.92    0.70
   9  -4   2   13.62    0.69
  -9   4   2   14.12    0.69
   9  -4   2   13.80    0.71
  -4  -9   2   15.36    0.63
   4   9   2   14.87    0.70
  -4  -9   2   15.07    0.69
  -4  -9   2   15.22    0.59
   5   9  -2   16.92    0.85
  -5  -9  -2   18.16    0.81
  -5  -9  -2   18.44    0.81
  -5  -9  -2   17.99    0.83
   9  -5  -2   19.35    0.89
  -9   5  -2   17.77    0.86
  -5  -9  -2   18.11    0.85
  -9   5  -2   18.11    0.84
   5   9  -2   18.40    0.83
   9  -5  -2   19.28    0.85
   9  -5  -2   19.80    0.88
   5   9   2   17.21    0.84
   9  -5   2   17.34    0.83
  -9   5   2   18.01    0.84
  -5  -9   2   18.70    0.73
  -5  -9   2   18.89    0.77
  -5  -9   2   18.64    0.82
   5   9   2   18.02    0.83
   9  -5   2   18.61    0.86
  -9   5   2   18.97    0.85
   9  -5   2   17.16    0.86
  -5  -9   2   18.85    0.85
   6   9  -2   18.63    0.85
  -9   6  -2   17.24    0.87
  -6  -9  -2   18.14    0.84
   6   9  -2   19.11    0.88
   9  -6  -2   18.23    0.90
   9  -6  -2   18.56    0.86
   9  -6  -2   18.45    0.88
  -6  -9  -2   18.81    0.87
  -6  -9  -2   19.35    0.84
  -9   6  -2   18.01    0.85
  -6  -9   2   17.30    0.78
   6   9   2   18.34    0.85
   6   9   2   18.48    0.87
  -9   6   2   18.77    0.87
   9  -6   2   19.31    0.87
   9  -6   2   18.92    0.88
   9  -6   2   19.02    0.89
  -6  -9   2   18.84    0.86
  -6  -9   2   18.35    0.83
  -9   6   2   19.39    0.86
   9  -7  -2    8.19    0.56
  -7  -9  -2    8.05    0.49
   7   9  -2    7.62    0.51
  -7  -9  -2    7.82    0.49
  -9   7  -2    8.44    0.54
   9  -7  -2    8.04    0.49
  -7  -9  -2    8.59    0.53
  -9   7  -2    7.58    0.49
   9  -7  -2    8.02    0.52
   7   9  -2    7.86    0.49
   7   9  -2    7.69    0.44
   7   9   2    8.00    0.49
   9  -7   2    7.07    0.48
  -7  -9   2    8.12    0.51
  -7  -9   2    8.12    0.45
   9  -7   2    8.14    0.56
  -9   7   2    8.20    0.50
   7   9   2    7.61    0.48
   9  -7   2    8.53    0.53
  -9   7   2    8.19    0.52
   7   9   2    7.71    0.51
   9  -8  -2    1.42    0.24
   8   9  -2    1.66    0.26
   8   9  -2    1.20    0.22
   8   9  -2    1.39    0.21
  -8  -9  -2    1.42    0.26
   9  -8  -2    1.27    0.25
  -9   8  -2    1.18    0.26
   9  -8  -2    1.49    0.29
  -9   8  -2    1.46    0.24
  -8  -9  -2    1.17    0.23
  -8  -9  -2    1.32    0.25
  -9   8   2    1.12    0.24
   8   9   2    1.49    0.24
  -9   8   2    1.59    0.25
   8   9   2    1.02    0.23
   9  -8   2    1.47    0.26
  -8  -9   2    1.26    0.22
  -8  -9   2    1.33    0.23
   9  -8   2    1.52    0.28
   9  -8   2    1.31    0.26
   8   9   2    1.26    0.23
  -8  -9   2    0.89    0.23
   9   9  -2   15.98    0.81
   9   9  -2   17.70    0.77
  -9  -9  -2   16.40    0.81
   9   9  -2   16.53    0.81
  -9  -9  -2   17.67    0.85
  -9  -9  -2   17.65    0.83
   9  -9  -2   15.54    0.85
  -9   9  -2   15.04    0.84
  -9   9  -2   15.62    0.82
   9  -9  -2   15.67    0.81
  -9  -9   2   15.78    0.80
   9   9   2   15.38    0.83
   9  -9   2   18.06    0.87
   9   9   2   14.74    0.80
  -9   9   2   17.23    0.86
   9  -9   2   16.88    0.82
  -9  -9   2   15.87    0.78
  -9   9   2   17.79    0.82
   9   9   2   15.39    0.79
   9  -9   2   16.80    0.86
  -9   9   2   16.91    0.84
  -9  -9   2   16.46    0.83
  10   9  -2    4.32    0.40
 -10  -9  -2    4.04    0.43
  10   9  -2    4.23    0.42
 -10  -9  -2    4.19    0.45
  -9  10  -2    3.26    0.41
   9 -10  -2    3.97    0.46
   9 -10   2    4.13    0.45
  -9  10   2    4.21    0.44
   9 -10   2    4.38    0.43
   9 -10   2    3.57    0.49
  -9  10   2    3.86    0.46
 -10  -9   2    3.93    0.43
 -10  -9   2    4.30    0.43
 -10  -9   2    3.58    0.41
  10   9   2    3.39    0.42
  10   9   2    3.92    0.44
  -9  10   2    4.25    0.45
  10   9   2    4.00    0.40
  10   8  -2   14.67    0.76
   8 -10  -2   14.01    0.78
 -10  -8  -2   14.56    0.76
  -8  10  -2   13.50    0.77
   8 -10  -2   13.67    0.73
  10   8  -2   14.84    0.70
  10   8  -2   13.99    0.74
  -8  10  -2   13.06    0.72
 -10  -8  -2   14.80    0.76
 -10  -8  -2   13.33    0.72
  10   8   2   13.94    0.73
  10   8   2   12.63    0.71
 -10  -8   2   13.97    0.72
 -10  -8   2   13.43    0.74
   8 -10   2   13.18    0.75
   8 -10   2   14.46    0.79
  -8  10   2   14.43    0.73
  -8  10   2   14.08    0.77
  -8  10   2   13.49    0.75
 -10  -8   2   14.05    0.73
  10   8   2   13.97    0.75
   8 -10   2   14.38    0.73
 -10  -7  -2    0.52    0.20
  10   7  -2    0.56    0.19
 -10  -7  -2    0.49    0.22
   7 -10  -2    0.16    0.18
  10   7  -2    0.54    0.19
  10   7  -2    0.52    0.20
 -10  -7  -2    0.78    0.23
  -7  10  -2    0.27    0.19
   7 -10  -2    0.63    0.22
  -7  10  -2    0.68    0.24
   7 -10   2    0.76    0.21
 -10  -7   2    0.97    0.22
 -10  -7   2    0.57    0.21
   7 -10   2    0.51    0.24
  10   7   2    0.51    0.19
   7 -10   2    0.35    0.23
 -10  -7   2    0.48    0.20
  10   7   2    0.34    0.20
  10   7   2    0.63    0.21
  -7  10   2    0.49    0.21
  -7  10   2    0.37    0.22
  10   6  -2   10.88    0.61
 -10  -6  -2   11.61    0.62
  10   6  -2   11.42    0.60
 -10  -6  -2   10.98    0.61
   6 -10  -2   11.58    0.62
 -10  -6  -2   11.61    0.63
  10   6  -2   10.87    0.60
   6 -10  -2   10.91    0.64
  -6  10  -2   10.80    0.61
  -6  10  -2   11.44    0.66
   6 -10   2   11.90    0.61
   6 -10   2   11.73    0.67
  -6  10   2   11.61    0.65
 -10  -6   2   11.05    0.62
  10   6   2   11.48    0.61
  10   6   2   10.95    0.61
  -6  10   2   11.49    0.65
 -10  -6   2   11.37    0.61
  -6  10   2   11.90    0.62
  10   6   2   11.06    0.63
   6 -10   2   12.02    0.65
 -10  -6   2   11.47    0.60
   5 -10  -2    2.50    0.32
 -10  -5  -2    2.08    0.27
  10   5  -2    2.62    0.29
 -10  -5  -2    2.26    0.30
  -5  10  -2    1.81    0.28
   5 -10  -2    2.03    0.29
 -10  -5  -2    2.30    0.31
  -5  10  -2    2.57    0.30
  10   5  -2    2.02    0.25
  10   5  -2    2.18    0.27
 -10  -5   2    1.87    0.26
  -5  10   2    2.08    0.28
  10   5   2    2.27    0.28
   5 -10   2    2.30    0.30
  -5  10   2    2.79    0.36
  -5  10   2    2.12    0.30
  10   5   2    1.82    0.26
 -10  -5   2    2.37    0.32
 -10  -5   2    1.93    0.26
  10   5   2    2.09    0.27
   5 -10   2    2.46    0.31
 -10  -4  -2   11.20    0.60
  10   4  -2   11.26    0.59
   4 -10  -2   11.27    0.61
 -10  -4  -2   11.17    0.58
  -4  10  -2   11.15    0.61
  -4  10  -2   11.43    0.59
 -10  -4  -2   11.90    0.62
   4 -10  -2   11.55    0.59
  -4  10  -2   10.75    0.56
  10   4  -2   11.25    0.59
  10   4  -2   11.08    0.58
  10   4   2   10.48    0.60
   4 -10   2   11.86    0.60
  -4  10   2   11.91    0.60
 -10  -4   2   10.18    0.58
  -4  10   2   10.78    0.58
  10   4   2   10.84    0.59
   4 -10   2   10.91    0.62
 -10  -4   2   10.02    0.60
  10   4   2   11.08    0.59
  -4  10   2   11.60    0.63
 -10  -4   2   11.05    0.57
  -3  10  -2    7.68    0.51
   3 -10  -2    8.30    0.48
 -10  -3  -2    7.54    0.48
   3 -10  -2    7.98    0.51
  -3  10  -2    8.14    0.48
  10   3  -2    7.83    0.48
  10   3  -2    8.26    0.48
  10   3  -2    7.77    0.47
  -3  10  -2    8.33    0.45
 -10  -3  -2    7.78    0.48
 -10  -3  -2    7.86    0.51
 -10  -3   2    8.18    0.49
  -3  10   2    8.54    0.50
   3 -10   2    7.57    0.51
  10   3   2    7.72    0.48
 -10  -3   2    8.11    0.52
  10   3   2    8.40    0.48
   3 -10   2    7.96    0.47
  -3  10   2    8.25    0.47
  -3  10   2    8.39    0.52
 -10  -3   2    8.13    0.46
  10   3   2    8.36    0.49
 -10  -2  -2    3.21    0.32
   2 -10  -2    2.86    0.35
   2 -10  -2    3.01    0.31
 -10  -2  -2    3.82    0.33
  -2  10  -2    3.22    0.32
 -10  -2  -2    3.12    0.36
  10   2  -2    3.65    0.32
  -2  10  -2    2.70    0.27
  10   2  -2    3.35    0.31
  10   2  -2    3.54    0.33
  -2  10  -2    3.83    0.37
  10   2   2    3.20    0.32
  10   2   2    3.41    0.32
  -2  10   2    3.79    0.32
 -10  -2   2    2.99    0.30
   2 -10   2    3.54    0.32
  -2  10   2    3.61    0.31
 -10  -2   2    3.42    0.33
  10   2   2    2.89    0.31
  -2  10   2    3.19    0.35
 -10  -2   2    3.96    0.36
   2 -10   2    3.58    0.36
  10   1  -2    1.18    0.21
  -1  10  -2    0.86    0.15
   1 -10  -2    0.69    0.17
 -10  -1  -2    1.03    0.22
  -1  10  -2    0.83    0.19
   1 -10  -2    0.77    0.21
   1 -10  -2    1.11    0.21
  -1  10  -2    0.81    0.21
 -10  -1  -2    0.44    0.20
  10   1  -2    1.06    0.21
  10   1  -2    0.70    0.19
 -10  -1  -2    1.02    0.21
   1 -10   2    1.19    0.20
  -1  10   2    1.00    0.19
   1 -10   2    1.04    0.22
  10   1   2    0.71    0.19
  10   1   2    0.64    0.20
 -10  -1   2    0.81    0.22
  10   1   2    0.72    0.18
 -10  -1   2    0.77    0.18
  -1  10   2    1.10    0.20
 -10  -1   2    1.02    0.21
  -1  10   2    1.17    0.22
   0  10  -2    8.48    0.51
   0 -10  -2    8.66    0.49
   0  10  -2    8.14    0.40
 -10   0  -2    8.95    0.50
   0 -10  -2    8.19    0.47
 -10   0  -2    8.81    0.50
   0  10  -2    8.54    0.48
 -10   0  -2    7.93    0.51
  10   0  -2    8.34    0.51
  10   0  -2    9.05    0.49
 -10   0   2    8.62    0.49
  10   0   2    7.83    0.49
   0  10   2    8.45    0.47
   0 -10   2    8.63    0.48
   0  10   2    8.35    0.51
 -10   0   2    8.25    0.53
  10   0   2    8.57    0.50
   0 -10   2    8.71    0.51
 -10   0   2    9.05    0.48
   0  10   2    8.68    0.48
  10   0   2    8.62    0.49
 -10   1  -2    0.81    0.18
  -1 -10  -2    1.12    0.22
  10  -1  -2    0.69    0.20
  10  -1  -2    0.90    0.19
  -1 -10  -2    1.22    0.19
 -10   1  -2    0.54    0.19
  -1 -10  -2    0.89    0.19
   1  10  -2    1.18    0.22
  10  -1  -2    0.72    0.19
   1  10  -2    0.78    0.17
 -10   1  -2    0.46    0.21
   1  10   2    0.79    0.20
  10  -1   2    0.99    0.21
   1  10   2    0.70    0.17
  -1 -10   2    0.83    0.20
  10  -1   2    1.22    0.22
   1  10   2    0.81    0.18
  -1 -10   2    0.73    0.18
  10  -1   2    0.70    0.21
 -10   1   2    1.02    0.19
 -10   1   2    0.86    0.20
   2  10  -2    3.40    0.35
  10  -2  -2    2.55    0.34
  10  -2  -2    3.32    0.32
  -2 -10  -2    3.56    0.37
  -2 -10  -2    3.18    0.32
  -2 -10  -2    3.53    0.30
 -10   2  -2    2.96    0.33
 -10   2  -2    3.10    0.34
 -10   2  -2    3.33    0.38
   2  10  -2    3.46    0.32
  -2 -10  -2    3.87    0.34
  10  -2  -2    3.47    0.34
 -10   2   2    3.82    0.34
  10  -2   2    3.48    0.35
   2  10   2    3.00    0.32
  10  -2   2    3.53    0.33
  -2 -10   2    3.40    0.31
 -10   2   2    3.83    0.33
  -2 -10   2    3.27    0.34
   2  10   2    3.11    0.34
  10  -2   2    3.62    0.37
  -2 -10   2    3.59    0.27
  10  -3  -2    7.67    0.52
  10  -3  -2    8.03    0.51
  -3 -10  -2    7.47    0.51
   3  10  -2    7.86    0.48
  10  -3  -2    8.26    0.49
  -3 -10  -2    8.07    0.47
 -10   3  -2    8.56    0.54
  -3 -10  -2    8.60    0.46
 -10   3  -2    7.64    0.49
 -10   3  -2    7.91    0.49
   3  10  -2    8.44    0.51
  -3 -10  -2    8.70    0.48
 -10   3   2    7.85    0.48
 -10   3   2    7.36    0.48
  10  -3   2    8.17    0.52
  -3 -10   2    8.71    0.42
  -3 -10   2    8.27    0.50
  -3 -10   2    8.23    0.47
   3  10   2    8.38    0.48
  10  -3   2    8.33    0.50
  -3 -10   2    8.13    0.35
  10  -3   2    8.20    0.49
   3  10   2    7.65    0.50
  -4 -10  -2   11.24    0.56
  -4 -10  -2   10.56    0.60
   4  10  -2   11.22    0.58
  -4 -10  -2   12.13    0.58
 -10   4  -2   10.37    0.60
  -4 -10  -2   11.26    0.58
  10  -4  -2   10.92    0.64
 -10   4  -2   10.29    0.59
  10  -4  -2   10.67    0.58
   4  10  -2   10.76    0.60
  10  -4  -2   10.89    0.61
  -4 -10   2   10.83    0.60
  -4 -10   2   10.96    0.51
 -10   4   2   10.82    0.59
  -4 -10   2   10.54    0.57
 -10   4   2   11.23    0.58
  -4 -10   2   10.37    0.46
  10  -4   2   10.75    0.61
  10  -4   2   11.13    0.60
  10  -4   2   11.73    0.63
   4  10   2   10.80    0.61
   4  10   2   10.66    0.58
  10  -5  -2    2.02    0.28
  10  -5  -2    2.20    0.35
   5  10  -2    2.33    0.33
 -10   5  -2    1.85    0.25
  -5 -10  -2    2.53    0.30
   5  10  -2    2.34    0.28
 -10   5  -2    1.94    0.29
  10  -5  -2    2.05    0.27
  -5 -10  -2    2.03    0.27
  -5 -10  -2    2.61    0.30
  -5 -10  -2    2.28    0.30
  10  -5   2    2.95    0.36
  10  -5   2    2.59    0.32
   5  10   2    2.04    0.29
  -5 -10   2    2.09    0.19
  -5 -10   2    2.35    0.32
   5  10   2    2.59    0.30
 -10   5   2    2.03    0.28
  -5 -10   2    2.24    0.26
  10  -5   2    2.46    0.29
 -10   5   2    2.41    0.28
  -5 -10   2    2.07    0.26
  10  -6  -2   11.19    0.65
  -6 -10  -2   11.49    0.60
  10  -6  -2   11.08    0.67
  -6 -10  -2   12.38    0.63
  10  -6  -2   11.31    0.62
  -6 -10  -2   11.88    0.60
 -10   6  -2   11.37    0.64
  -6 -10  -2   11.88    0.65
 -10   6  -2   11.40    0.62
   6  10  -2   11.28    0.64
   6  10  -2   11.80    0.61
  -6 -10   2   11.69    0.63
   6  10   2   10.65    0.60
  -6 -10   2   11.22    0.56
  -6 -10   2   12.38    0.61
  10  -6   2   12.41    0.66
  10  -6   2   11.42    0.65
 -10   6   2   11.54    0.64
   6  10   2   11.20    0.63
 -10   6   2   11.72    0.62
  -6 -10   2   11.03    0.51
  10  -6   2   12.17    0.63
  10  -7  -2    0.70    0.21
  -7 -10  -2    0.84    0.24
  -7 -10  -2    0.44    0.20
  10  -7  -2    0.85    0.26
 -10   7  -2    0.60    0.20
  -7 -10  -2    0.64    0.20
   7  10  -2    0.68    0.19
 -10   7  -2    0.39    0.21
  10  -7  -2    0.45    0.20
   7  10  -2    0.65    0.21
  -7 -10   2    0.93    0.20
 -10   7   2    0.62    0.20
  -7 -10   2    0.77    0.20
   7  10   2    0.72    0.22
  10  -7   2    0.71    0.23
 -10   7   2    0.33    0.19
  -7 -10   2    0.71    0.19
   7  10   2    1.01    0.23
  10  -7   2    0.49    0.20
  10  -7   2    0.36    0.21
  10  -8  -2   14.69    0.78
  -8 -10  -2   13.88    0.73
  -8 -10  -2   13.90    0.73
 -10   8  -2   13.89    0.73
  -8 -10  -2   13.45    0.75
  10  -8  -2   13.31    0.77
   8  10  -2   12.92    0.71
   8  10  -2   13.90    0.76
  10  -8  -2   13.43    0.73
 -10   8  -2   12.80    0.75
   8  10  -2   13.64    0.67
  -8 -10   2   13.92    0.71
  10  -8   2   14.77    0.79
   8  10   2   13.87    0.71
  10  -8   2   14.07    0.73
  10  -8   2   14.53    0.79
   8  10   2   13.73    0.72
  -8 -10   2   13.17    0.68
 -10   8   2   13.93    0.72
   8  10   2   13.89    0.75
  -8 -10   2   13.33    0.73
 -10   8   2   13.79    0.74
   9  10  -2    3.83    0.38
  10  -9  -2    3.42    0.47
  -9 -10  -2    3.67    0.43
  10  -9  -2    3.54    0.44
 -10   9  -2    3.07    0.40
   9  10  -2    4.34    0.42
  -9 -10  -2    3.78    0.43
   9  10   2    3.28    0.42
  -9 -10   2    3.30    0.45
   9  10   2    3.77    0.39
   9  10   2    3.47    0.40
 -10   9   2    4.10    0.42
  10  -9   2    3.55    0.48
 -10   9   2    3.41    0.44
  10  -9   2    4.33    0.40
  -9 -10   2    3.12    0.39
  10  -9   2    4.42    0.47
 -10 -10  -2    8.00    0.58
  10  10  -2    7.24    0.53
  10  10  -2    7.80    0.51
 -10 -10  -2    7.42    0.53
 -10  10  -2    8.90    0.60
  10 -10  -2    8.49    0.62
 -10 -10  -2    7.29    0.54
  10  10  -2    6.85    0.56
 -10  10  -2    9.16    0.58
  10 -10  -2    8.24    0.56
  10 -10  -2    8.46    0.61
  10 -10   2    7.26    0.61
 -10 -10   2    7.83    0.54
  10  10   2    8.25    0.58
  10  10   2    7.94    0.57
  10 -10   2    6.61    0.56
 -10 -10   2    8.43    0.56
 -10  10   2    7.83    0.59
 -10  10   2    7.41    0.55
  10  10   2    8.46    0.56
 -11 -10  -2    0.75    0.27
  11  10  -2    0.78    0.24
 -10  11  -2    1.40    0.28
 -11 -10  -2    1.08    0.30
  10 -11  -2    0.81    0.30
  10 -11  -2    0.76    0.28
  11  10  -2    0.96    0.25
  11  10   2    0.75    0.29
 -11 -10   2    1.07    0.28
 -11 -10   2    0.68    0.26
 -10  11   2    0.16    0.27
  10 -11   2    0.42    0.24
 -10  11   2    0.66    0.26
  10 -11   2    0.73    0.28
  11  10   2    0.37    0.21
 -10  11   2    1.11    0.31
 -11 -10   2    0.70    0.25
  11  10   2    0.76    0.30
  -9  11  -2    2.29    0.32
   9 -11  -2    1.98    0.34
 -11  -9  -2    1.62    0.28
 -11  -9  -2    0.86    0.25
  -9  11  -2    1.34    0.29
   9 -11  -2    1.92    0.30
  11   9  -2    1.17    0.27
 -11  -9  -2    1.16    0.30
  11   9  -2    1.58    0.27
  11   9  -2    1.43    0.29
  11   9   2    1.41    0.28
 -11  -9   2    1.41    0.31
   9 -11   2    1.35    0.35
  -9  11   2    1.18    0.28
  11   9   2    1.36    0.30
 -11  -9   2    1.69    0.29
  -9  11   2    0.83    0.29
   9 -11   2    1.55    0.30
  11   9   2    1.95    0.31
  11   8  -2    7.48    0.49
   8 -11  -2    6.73    0.55
 -11  -8  -2    7.38    0.54
  -8  11  -2    6.76    0.53
  11   8  -2    7.68    0.50
 -11  -8  -2    6.42    0.54
   8 -11   2    7.92    0.54
  11   8   2    6.66    0.53
 -11  -8   2    7.36    0.53
  11   8   2    7.36    0.53
   8 -11   2    7.24    0.62
  -8  11   2    7.35    0.55
 -11  -8   2    6.90    0.50
  -8  11   2    8.60    0.55
   8 -11   2    7.59    0.57
  11   8   2    6.64    0.51
 -11  -8   2    7.38    0.55
  -8  11   2    7.61    0.56
  11   7  -2   15.98    0.81
   7 -11  -2   18.00    0.83
   7 -11  -2   16.52    0.85
  11   7  -2   14.61    0.79
 -11  -7  -2   14.72    0.79
 -11  -7  -2   15.24    0.82
  -7  11  -2   16.64    0.87
  -7  11  -2   17.07    0.82
 -11  -7  -2   16.21    0.82
  11   7  -2   15.42    0.78
  11   7   2   16.31    0.80
   7 -11   2   15.90    0.85
  -7  11   2   14.90    0.83
  11   7   2   16.25    0.81
  -7  11   2   15.07    0.79
 -11  -7   2   16.81    0.80
 -11  -7   2   17.34    0.84
 -11  -7   2   15.79    0.81
   7 -11   2   15.57    0.84
  -7  11   2   16.25    0.84
   7 -11   2   16.18    0.80
  11   7   2   16.90    0.83
  11   6  -2    8.22    0.53
 -11  -6  -2    8.29    0.56
 -11  -6  -2    8.17    0.54
   6 -11  -2    8.13    0.57
  11   6  -2    8.29    0.54
  -6  11  -2    8.45    0.54
  -6  11  -2    8.39    0.58
   6 -11  -2    8.84    0.55
 -11  -6  -2    8.40    0.54
  11   6  -2    8.17    0.52
  -6  11   2    7.80    0.52
  -6  11   2    8.45    0.57
   6 -11   2    8.28    0.53
 -11  -6   2    9.26    0.56
  11   6   2    8.52    0.54
 -11  -6   2    8.49    0.52
   6 -11   2    7.72    0.56
  11   6   2    8.38    0.53
  -6  11   2    8.24    0.57
  11   6   2    8.88    0.53
 -11  -6   2    8.31    0.55
  -5  11  -2    7.08    0.54
  -5  11  -2    7.57    0.48
 -11  -5  -2    6.95    0.50
  -5  11  -2    6.82    0.46
 -11  -5  -2    6.46    0.48
  11   5  -2    7.06    0.48
 -11  -5  -2    7.63    0.51
  11   5  -2    7.60    0.49
   5 -11  -2    6.66    0.48
   5 -11  -2    6.44    0.49
  11   5  -2    6.90    0.48
  -5  11   2    7.15    0.52
  11   5   2    6.87    0.48
  -5  11   2    6.98    0.50
  11   5   2    7.50    0.49
 -11  -5   2    7.12    0.51
 -11  -5   2    6.08    0.47
   5 -11   2    6.45    0.51
 -11  -5   2    7.02    0.46
   5 -11   2    6.69    0.48
  11   5   2    6.79    0.47
  -5  11   2    7.23    0.48
 -11  -4  -2    5.82    0.44
  -4  11  -2    5.47    0.41
  11   4  -2    5.86    0.44
   4 -11  -2    5.49    0.42
 -11  -4  -2    6.30    0.47
  11   4  -2    4.93    0.41
  11   4  -2    5.58    0.42
 -11  -4  -2    5.04    0.41
   4 -11  -2    5.20    0.45
  -4  11  -2    5.79    0.48
  -4  11  -2    5.56    0.43
  11   4   2    6.61    0.44
   4 -11   2    5.47    0.47
 -11  -4   2    5.94    0.47
  11   4   2    5.67    0.43
   4 -11   2    5.53    0.44
 -11  -4   2    5.44    0.43
  -4  11   2    5.74    0.42
 -11  -4   2    5.90    0.42
  -4  11   2    5.62    0.47
  -4  11   2    6.31    0.45
  11   4   2    5.23    0.42
  -3  11  -2    2.42    0.29
 -11  -3  -2    2.14    0.30
   3 -11  -2    2.89    0.35
  11   3  -2    2.54    0.32
  11   3  -2    2.41    0.29
  -3  11  -2    2.36    0.32
 -11  -3  -2    2.25    0.32
 -11  -3  -2    2.20    0.29
   3 -11  -2    2.63    0.31
  -3  11  -2    2.70    0.32
  11   3  -2    2.40    0.33
  11   3   2    2.42    0.33
  -3  11   2    2.49    0.31
 -11  -3   2    2.64    0.30
   3 -11   2    2.30    0.27
  -3  11   2    2.23    0.28
 -11  -3   2    3.03    0.38
  11   3   2    3.46    0.33
  -3  11   2    2.72    0.36
   3 -11   2    2.09    0.30
  11   3   2    2.97    0.34
 -11  -3   2    3.06    0.34
  -2  11  -2    6.76    0.45
  11   2  -2    6.67    0.46
  -2  11  -2    6.49    0.49
  11   2  -2    7.78    0.48
   2 -11  -2    7.18    0.46
   2 -11  -2    6.95    0.49
 -11  -2  -2    6.96    0.46
  -2  11  -2    7.00    0.40
  11   2  -2    6.86    0.46
 -11  -2  -2    6.45    0.49
 -11  -2  -2    6.31    0.46
  11   2   2    7.26    0.48
   2 -11   2    7.00    0.45
  -2  11   2    7.08    0.45
   2 -11   2    6.78    0.49
 -11  -2   2    7.20    0.45
  -2  11   2    6.79    0.44
  -2  11   2    6.46    0.47
 -11  -2   2    7.20    0.53
  11   2   2    7.52    0.46
  11   2   2    6.64    0.45
 -11  -2   2    7.16    0.46
 -11  -1  -2   11.29    0.60
  -1  11  -2   10.49    0.52
  11   1  -2   11.11    0.60
  -1  11  -2   10.87    0.58
  11   1  -2   10.90    0.61
   1 -11  -2   10.90    0.59
  -1  11  -2   11.28    0.62
 -11  -1  -2   11.13    0.63
  11   1  -2   11.19    0.60
 -11  -1  -2   10.52    0.59
  11   1   2   10.90    0.60
  -1  11   2   10.50    0.57
  11   1   2   11.22    0.59
   1 -11   2   11.50    0.61
  -1  11   2   11.54    0.59
   1 -11   2   10.27    0.57
 -11  -1   2   11.53    0.59
  -1  11   2   10.03    0.61
  11   1   2   11.12    0.59
 -11  -1   2   10.97    0.59
 -11  -1   2   11.74    0.64
   0  11  -2    0.22    0.15
 -11   0  -2    0.30    0.20
   0  11  -2    0.31    0.12
  11   0  -2    0.05    0.18
   0 -11  -2    0.23    0.16
 -11   0  -2    0.15    0.17
   0 -11  -2    0.12    0.17
   0  11  -2    0.24    0.20
  11   0  -2    0.19    0.17
 -11   0  -2    0.27    0.19
   0 -11  -2    0.24    0.19
  11   0  -2    0.16    0.18
   0 -11   2    0.25    0.17
   0  11   2    0.19    0.18
   0  11   2    0.11    0.19
   0 -11   2    0.10    0.17
 -11   0   2    0.13    0.17
 -11   0   2   -0.25    0.22
 -11   0   2    0.24    0.16
  11   0   2    0.29    0.17
   0  11   2    0.17    0.17
  11   0   2    0.26    0.17
  11   0   2    0.15    0.16
  11  -1  -2    9.75    0.63
  11  -1  -2   10.54    0.61
   1  11  -2   11.19    0.59
 -11   1  -2   10.71    0.61
 -11   1  -2   10.15    0.62
  -1 -11  -2   11.47    0.59
   1  11  -2   10.85    0.63
  -1 -11  -2   11.26    0.57
 -11   1  -2   11.30    0.61
  11  -1  -2   11.02    0.59
  -1 -11  -2   11.25    0.62
  11  -1   2   11.20    0.61
  -1 -11   2   11.65    0.62
  11  -1   2   11.80    0.63
 -11   1   2   11.64    0.60
   1  11   2   11.17    0.59
 -11   1   2   11.05    0.60
  -1 -11   2   11.42    0.60
  11  -1   2   11.38    0.60
   1  11   2   10.91    0.62
  -2 -11  -2    6.65    0.43
  -2 -11  -2    7.17    0.49
  11  -2  -2    7.23    0.51
  11  -2  -2    7.51    0.47
 -11   2  -2    7.01    0.47
 -11   2  -2    7.52    0.54
   2  11  -2    6.92    0.49
 -11   2  -2    7.08    0.48
  -2 -11  -2    7.08    0.46
  -2 -11  -2    7.46    0.46
   2  11  -2    6.75    0.46
  11  -2  -2    7.33    0.49
 -11   2   2    7.00    0.47
 -11   2   2    7.20    0.47
   2  11   2    7.24    0.49
  11  -2   2    7.03    0.46
  -2 -11   2    7.60    0.46
  11  -2   2    6.76    0.50
   2  11   2    7.07    0.45
  -2 -11   2    7.30    0.48
  -2 -11   2    7.53    0.41
  11  -2   2    6.85    0.48
 -11   3  -2    3.02    0.35
  -3 -11  -2    2.35    0.31
  11  -3  -2    2.28    0.32
  -3 -11  -2    2.32    0.30
   3  11  -2    2.40    0.33
 -11   3  -2    2.80    0.38
  -3 -11  -2    2.20    0.30
 -11   3  -2    2.83    0.34
   3  11  -2    2.66    0.32
  11  -3  -2    2.82    0.32
  -3 -11  -2    2.40    0.32
  11  -3  -2    1.69    0.29
 -11   3   2    2.59    0.33
 -11   3   2    2.46    0.33
  -3 -11   2    2.84    0.27
  11  -3   2    2.66    0.36
  -3 -11   2    2.14    0.29
  11  -3   2    2.55    0.36
   3  11   2    2.93    0.37
  -3 -11   2    2.78    0.33
  11  -3   2    2.20    0.30
   3  11   2    2.55    0.32
  -4 -11  -2    5.69    0.40
  -4 -11  -2    6.36    0.42
   4  11  -2    5.35    0.41
  -4 -11  -2    5.76    0.47
  11  -4  -2    5.46    0.48
  11  -4  -2    5.83    0.44
  11  -4  -2    5.67    0.45
 -11   4  -2    5.34    0.44
   4  11  -2    6.28    0.45
  -4 -11  -2    6.44    0.42
 -11   4  -2    5.70    0.44
 -11   4   2    6.34    0.44
  -4 -11   2    5.44    0.44
   4  11   2    5.58    0.42
  -4 -11   2    5.78    0.41
  11  -4   2    5.74    0.43
   4  11   2    5.71    0.45
  11  -4   2    5.90    0.46
  11  -4   2    5.51    0.44
 -11   4   2    5.97    0.44
  -4 -11   2    5.70    0.36
  -4 -11   2    5.68    0.29
   5  11  -2    7.41    0.48
  -5 -11  -2    7.04    0.47
  11  -5  -2    7.48    0.49
 -11   5  -2    6.70    0.47
  -5 -11  -2    7.74    0.48
  -5 -11  -2    7.48    0.46
 -11   5  -2    7.42    0.50
   5  11  -2    7.05    0.50
  11  -5  -2    7.25    0.56
  11  -5  -2    7.31    0.50
  -5 -11  -2    6.94    0.50
  -5 -11   2    7.22    0.46
  -5 -11   2    7.22    0.35
  11  -5   2    7.54    0.51
  11  -5   2    6.84    0.51
 -11   5   2    7.12    0.49
   5  11   2    7.30    0.50
  -5 -11   2    7.29    0.49
 -11   5   2    6.83    0.49
  -5 -11   2    7.36    0.42
  11  -5   2    6.75    0.47
   5  11   2    7.05    0.46
  -6 -11  -2    7.87    0.56
  11  -6  -2    8.85    0.55
  -6 -11  -2    8.35    0.51
 -11   6  -2    8.50    0.55
  -6 -11  -2    8.04    0.51
  11  -6  -2    8.18    0.56
   6  11  -2    8.08    0.55
 -11   6  -2    8.31    0.56
[truncated: 2,330,916 more chars]
